# Supplementary material for: Correlation of Aquaporins and Transmembrane Solute Transporters Revealed by Genome-Wide Analysis in Developing Maize Leaf
Source: Comp Funct Genomics. 2012 Sep 26;2012:546930. doi: 10.1155/2012/546930 (PMC3463914; doi:10.1155/2012/546930)
Supplement: Supplementary file 1 — Supplemental file1: 812 maize transmembrane transport genes and expression along the leaf developmental gradient. Supplemental file2: 33 identified aquaporins in maize from the MaizeGDB and Affymetrix GeneChip Maize Genome Array. Supplemental file3: Simiar pattern of maize aquaporins and transmembrane solutes(ions) transporters in developing maize leaf. [file 546930.f1.zip]

Archive with 3 entries (3 files):
- Supplementary_1_transmembrane_transport_EXP_CFG_376808.xls
- Supplementary_2-_maize_aquaporins_33_gene_CFG_376809.xls
- Supplementary_3_simiar_pattern_expr_CFG_376810.xls
