# Supplementary material for: Correlation of Aquaporins and Transmembrane Solute Transporters Revealed by Genome-Wide Analysis in Developing Maize Leaf
Source: Comp Funct Genomics. 2012 Sep 26;2012:546930. doi: 10.1155/2012/546930 (PMC3463914; doi:10.1155/2012/546930)
Supplement: Supplementary file 1 — Supplemental file1: 812 maize transmembrane transport genes and expression along the leaf developmental gradient. Supplemental file2: 33 identified aquaporins in maize from the MaizeGDB and Affymetrix GeneChip Maize Genome Array. Supplemental file3: Simiar pattern of maize aquaporins and transmembrane solutes(ions) transporters in developing maize leaf. [file 546930.f1.zip › Supplementary_1_transmembrane_transport_EXP_CFG_376808.xls]

## Sheet: data_transmembrane_transport_EX
Col001	Mapman_ANN	kdescription	At_homolog	At_Tair9_short_description	RPKM_base	RPKM_1cm	RPKM_4cm	RPKMtip	Col002
GRMZM2G081886_T01	amino acid metabolism.synthesis.serine-glycine-cysteine group.serine.phosphoglycerate dehydrogenase	D-3-phosphoglycerate dehydrogenase, chloroplast precursor, putative, expressed	AT4G34200.1	EDA9 (embryo sac development arrest 9); ATP binding	37.85691551	11.37060234	1.452644367	1.388887111	GO:0055114; oxidation reduction | GO:0051287; NAD or NADH binding | GO:0048037; cofactor binding | GO:0016616; oxidoreductase activity acting on the CH-OH group of donors NAD or NADP as acceptor | GO:0016597; amino acid binding | GO:0008324; cation transmembrane transporter activity | GO:0008152; metabolic process | GO:0006813; potassium ion transport | GO:0006564; L-serine biosynthetic process |…
GRMZM2G105844_T01	cell wall.modification	alpha-expansin 15 precursor, putative, expressed	AT1G69530.2	ATEXPA1 (ARABIDOPSIS THALIANA EXPANSIN A1)	25.15363225	1.162505591	1.011492497	0.614459803	RefSeq_dna:NM_001112172; alpha expansin2 (expa2) mRNA | RefSeq_peptide:NP_001105642; alpha expansin2 | UniGene:Zm.11756; Alpha expansin2 | Uniprot/SPTREMBL:B6TP92; Alpha-expansin 15 | Uniprot/SPTREMBL:B8A1G1; Putative uncharacterized protein | MaizeGDB_GenBank:AY104768; | GO:0016021; integral to membrane | GO:0015450; P-P-bond-hydrolysis-driven protein transmembrane transporter activity | GO:0009…
GRMZM2G145460_T02	cell wall.precursor synthesis.MUR4	UDP-arabinose 4-epimerase 2, putative, expressed	AT1G30620.2	MUR4 (MURUS 4); UDP-arabinose 4-epimerase/ catalytic	12.30106973	3.748499569	2.00538295	1.762715821	UniGene:Zm.146586; TSA: Zea mays contig29983 mRNA sequence | GO:0008324; cation transmembrane transporter activity | GO:0006813; potassium ion transport
GRMZM2G347717_T01	cell wall.precursor synthesis.UXS	UDP-glucuronic acid decarboxylase 1, putative, expressed	AT3G62830.2	AUD1; UDP-glucuronate decarboxylase/ catalytic/ dTDP-glucose 4,6-dehydratase	3.0185776	1.218382157	0.232474054	0.01109554	GO:0050662; coenzyme binding | GO:0044237; cellular metabolic process | GO:0008324; cation transmembrane transporter activity | GO:0006813; potassium ion transport | GO:0006694; steroid biosynthetic process | GO:0003854; 3-beta-hydroxy-delta5-steroid dehydrogenase activity | GO:0003824; catalytic activity
GRMZM2G347717_T03	cell wall.precursor synthesis.UXS	UDP-glucuronic acid decarboxylase 1, putative, expressed	AT3G62830.2	AUD1; UDP-glucuronate decarboxylase/ catalytic/ dTDP-glucose 4,6-dehydratase	3.0185776	1.218382157	0.232474054	0.01109554	Uniprot/SPTREMBL:B4FXG1; Putative uncharacterized protein | RefSeq_peptide:NP_001141656; hypothetical protein LOC100273781 | RefSeq_dna:NM_001148184; hypothetical protein LOC100273781 (LOC100273781) mRNA | GO:0050662; coenzyme binding | GO:0044237; cellular metabolic process | GO:0008324; cation transmembrane transporter activity | GO:0006813; potassium ion transport | GO:0006694; steroid biosynt…
GRMZM2G069098_T01	development.unspecified	transparent testa 12 protein, putative, expressed	AT1G47530.1	ripening-responsive protein, putative	8.226249108	1.494445963	0.506656688	0.094866867	Uniprot/SPTREMBL:B6UF91; Transparent testa 12 protein | UniGene:Zm.35225; Transparent testa 12 protein | RefSeq_peptide:NP_001152524; transparent testa 12 protein | RefSeq_dna:NM_001159052; transparent testa 12 protein (LOC100286164) mRNA | GO:0055085; transmembrane transport | GO:0016020; membrane | GO:0015297; antiporter activity | GO:0015238; drug transmembrane transporter activity | GO:000685…
GRMZM2G003002_T02	DNA.synthesis/chromatin structure.histone	histone H1, putative, expressed	AT1G06760.1	histone H1, putative	307.1338864	77.44764593	59.86405371	30.88726694	Uniprot/SWISSPROT:P23444; Histone H1 | RefSeq_peptide:NP_001105430; histone H1 | RefSeq_dna:NM_001111960; H1 histone (H1) mRNA | GO:0030288; outer membrane-bounded periplasmic space | GO:0006826; iron ion transport | GO:0006334; nucleosome assembly | GO:0005634; nucleus | GO:0005381; iron ion transmembrane transporter activity | GO:0003677; DNA binding | GO:0000786; nucleosome | GO:0000785; chrom…
GRMZM2G176307_T01	glycolysis.glyceraldehyde 3-phosphate dehydrogenase	glyceraldehyde-3-phosphate dehydrogenase, cytosolic 3, putative, expressed	AT1G13440.1	GAPC2 (GLYCERALDEHYDE-3-PHOSPHATE DEHYDROGENASE C2); NAD or NADH binding / binding / catalytic/ glyceraldehyde-3-phosphate dehydrogenase (phosphorylating)/ glyceraldehyde-3-phosphate dehydrogenase	199.0179924	98.17769693	16.35783941	6.732564355	RefSeq_dna:NM_001112481; cytosolic glyceroldehyde-3-phosphate dehydrogenase GAPC4 (gpc4) mRNA | RefSeq_peptide:NP_001105951; cytosolic glyceroldehyde-3-phosphate dehydrogenase GAPC4 | UniGene:Zm.131490; Transcribed locus moderately similar to NP_001053139.1 Os04g0486600 [Oryza sativa Japonica Group] | Uniprot/SPTREMBL:B4G0L9; Putative uncharacterized protein | Uniprot/SPTREMBL:Q43359; Cytosolic g…
GRMZM2G176307_T02	glycolysis.glyceraldehyde 3-phosphate dehydrogenase	glyceraldehyde-3-phosphate dehydrogenase, cytosolic 3, putative, expressed	AT1G13440.1	GAPC2 (GLYCERALDEHYDE-3-PHOSPHATE DEHYDROGENASE C2); NAD or NADH binding / binding / catalytic/ glyceraldehyde-3-phosphate dehydrogenase (phosphorylating)/ glyceraldehyde-3-phosphate dehydrogenase	199.0179924	98.17769693	16.35783941	6.732564355	RefSeq_dna:NM_001112481; cytosolic glyceroldehyde-3-phosphate dehydrogenase GAPC4 (gpc4) mRNA | RefSeq_peptide:NP_001105951; cytosolic glyceroldehyde-3-phosphate dehydrogenase GAPC4 | UniGene:Zm.131490; Transcribed locus moderately similar to NP_001053139.1 Os04g0486600 [Oryza sativa Japonica Group] | Uniprot/SPTREMBL:B4G0L9; Putative uncharacterized protein | Uniprot/SPTREMBL:Q43359; Cytosolic g…
GRMZM2G074267_T01	hormone metabolism.auxin.signal transduction	auxin efflux carrier component 1, putative, expressed	AT1G73590.1	PIN1 (PIN-FORMED 1); transporter	38.56945677	23.90104753	8.577457263	1.365979212	Uniprot/SPTREMBL:Q0MWY1; Putative auxin efflux carrier | UniGene:Zm.7858; TSA: Zea mays contig23606 mRNA sequence | UniGene:Zm.155629; Transcribed locus strongly similar to NP_001048095.1 Os02g0743400 [Oryza sativa Japonica Group] | GO:0055085; transmembrane transport | GO:0016021; integral to membrane
GRMZM2G098643_T01	hormone metabolism.auxin.signal transduction	auxin efflux carrier component 1c, putative, expressed	AT1G73590.1	PIN1 (PIN-FORMED 1); transporter	11.023017	1.71517668	0.701555022	0.351468311	Uniprot/SPTREMBL:Q0MWY2; Putative auxin efflux carrier | UniGene:Zm.14578; TSA: Zea mays contig32751 mRNA sequence | UniGene:Zm.138753; Full-length cDNA clone ZM_BFb0174A15 | GO:0055085; transmembrane transport | GO:0050826; response to freezing | GO:0050825; ice binding | GO:0042309; homoiothermy | GO:0016021; integral to membrane
GRMZM2G149184_T01	hormone metabolism.auxin.signal transduction	auxin efflux carrier component 1, putative, expressed	AT1G73590.1	PIN1 (PIN-FORMED 1); transporter	6.586784611	2.93971818	1.342715661	0.213199427	GO:0016021; integral to membrane | GO:0055085; transmembrane transport | Uniprot/SPTREMBL:B2D1S1; Putative auxin efflux carrier
GRMZM2G125552_T01	hormone metabolism.auxin.synthesis-degradation	IAA-amino acid hydrolase ILR1 precursor, putative, expressed	AT3G02875.1	ILR1 (IAA-LEUCINE RESISTANT 1); IAA-Leu conjugate hydrolase/ IAA-Phe conjugate hydrolase/ metallopeptidase	6.573198632	4.49448123	2.519560344	1.149091634	RefSeq_dna:NM_001147161; hypothetical protein LOC100272708 (LOC100272708) mRNA | RefSeq_peptide:NP_001140633; hypothetical protein LOC100272708 | UniGene:Zm.111415; Transcribed locus | UniGene:Zm.94046; Hypothetical protein LOC100272708 | Uniprot/SPTREMBL:B4FQ26; Putative uncharacterized protein | Uniprot/SPTREMBL:B7ZXV5; Putative uncharacterized protein | GO:0055085; transmembrane transport | GO…
GRMZM2G125552_T03	hormone metabolism.auxin.synthesis-degradation	IAA-amino acid hydrolase ILR1 precursor, putative, expressed	AT3G02875.1	ILR1 (IAA-LEUCINE RESISTANT 1); IAA-Leu conjugate hydrolase/ IAA-Phe conjugate hydrolase/ metallopeptidase	6.573198632	4.49448123	2.519560344	1.149091634	Uniprot/SPTREMBL:B7ZXV5; Putative uncharacterized protein | Uniprot/SPTREMBL:B4FQ26; Putative uncharacterized protein | RefSeq_peptide:NP_001140633; hypothetical protein LOC100272708 | GO:0055085; transmembrane transport | GO:0016787; hydrolase activity | GO:0016020; membrane | GO:0008152; metabolic process | GO:0006821; chloride transport | GO:0005515; protein binding | GO:0005247; voltage-gated…
GRMZM2G155348_T01	lipid metabolism.glyceral metabolism.Glycerol-3-phosphate dehydrogenase (NAD+)	glycerol-3-phosphate dehydrogenase, putative, expressed	AT2G41540.3	GPDHC1; NAD or NADH binding / glycerol-3-phosphate dehydrogenase (NAD+)	76.2210101	57.50833686	1.048517745	0.351598809	GO:0046168; glycerol-3-phosphate catabolic process | GO:0051287; NAD or NADH binding | GO:0055114; oxidation reduction | RefSeq_dna:NM_001147906; hypothetical protein LOC100273469 (LOC100273469) mRNA | RefSeq_peptide:NP_001141378; hypothetical protein LOC100273469 | UniGene:Zm.95931; Hypothetical protein LOC100273469 | Uniprot/SPTREMBL:B4FVR2; Putative uncharacterized protein | Uniprot/SPTREMBL:C…
GRMZM2G155348_T03	lipid metabolism.glyceral metabolism.Glycerol-3-phosphate dehydrogenase (NAD+)	glycerol-3-phosphate dehydrogenase, putative, expressed	AT2G41540.3	GPDHC1; NAD or NADH binding / glycerol-3-phosphate dehydrogenase (NAD+)	76.2210101	57.50833686	1.048517745	0.351598809	GO:0016616; oxidoreductase activity acting on the CH-OH group of donors NAD or NADP as acceptor | GO:0046168; glycerol-3-phosphate catabolic process | GO:0051287; NAD or NADH binding | GO:0055114; oxidation reduction | RefSeq_peptide:NP_001141378; hypothetical protein LOC100273469 | Uniprot/SPTREMBL:B4FVR2; Putative uncharacterized protein | Uniprot/SPTREMBL:C4JAS5; Putative uncharacterized prote…
GRMZM2G153704_T01	major CHO metabolism.degradation.starch.transporter	arabinose-proton symporter, putative, expressed	AT5G16150.3	PGLCT (PLASTIDIC GLC TRANSLOCATOR); carbohydrate transmembrane transporter/ sugar:hydrogen symporter	19.21903822	12.29075834	6.440883559	3.797366225	Uniprot/SPTREMBL:Q9LLD9; Hexose transporter Fragment | Uniprot/SPTREMBL:C0P7D9; Putative uncharacterized protein | Uniprot/SPTREMBL:B4FUK4; Putative uncharacterized protein | UniGene:Zm.122257; Transcribed locus moderately similar to XP_002457425.1 hypothetical protein SORBIDRAFT_03g007100 [Sorghum bicolor] | GO:0055085; transmembrane transport | GO:0022891; substrate-specific transmembrane trans…
GRMZM2G153704_T02	major CHO metabolism.degradation.starch.transporter	arabinose-proton symporter, putative, expressed	AT5G16150.3	PGLCT (PLASTIDIC GLC TRANSLOCATOR); carbohydrate transmembrane transporter/ sugar:hydrogen symporter	19.21903822	12.29075834	6.440883559	3.797366225	Uniprot/SPTREMBL:C0P7D9; Putative uncharacterized protein | Uniprot/SPTREMBL:B4FUK4; Putative uncharacterized protein | GO:0055085; transmembrane transport | GO:0022891; substrate-specific transmembrane transporter activity | GO:0016021; integral to membrane | GO:0016020; membrane | GO:0006810; transport | GO:0005576; extracellular region | GO:0005215; transporter activity
GRMZM2G153704_T03	major CHO metabolism.degradation.starch.transporter	arabinose-proton symporter, putative, expressed	AT5G16150.3	PGLCT (PLASTIDIC GLC TRANSLOCATOR); carbohydrate transmembrane transporter/ sugar:hydrogen symporter	19.21903822	12.29075834	6.440883559	3.797366225	GO:0055085; transmembrane transport | GO:0022891; substrate-specific transmembrane transporter activity | GO:0016021; integral to membrane | GO:0016020; membrane | GO:0006810; transport | GO:0005576; extracellular region | GO:0005215; transporter activity
GRMZM2G153704_T04	major CHO metabolism.degradation.starch.transporter	arabinose-proton symporter, putative, expressed	AT5G16150.3	PGLCT (PLASTIDIC GLC TRANSLOCATOR); carbohydrate transmembrane transporter/ sugar:hydrogen symporter	19.21903822	12.29075834	6.440883559	3.797366225	Uniprot/SPTREMBL:C0P7D9; Putative uncharacterized protein | Uniprot/SPTREMBL:B4FUK4; Putative uncharacterized protein | GO:0055085; transmembrane transport | GO:0022891; substrate-specific transmembrane transporter activity | GO:0016021; integral to membrane | GO:0016020; membrane | GO:0006810; transport | GO:0005576; extracellular region | GO:0005215; transporter activity
GRMZM2G153704_T05	major CHO metabolism.degradation.starch.transporter	arabinose-proton symporter, putative, expressed	AT5G16150.3	PGLCT (PLASTIDIC GLC TRANSLOCATOR); carbohydrate transmembrane transporter/ sugar:hydrogen symporter	19.21903822	12.29075834	6.440883559	3.797366225	GO:0055085; transmembrane transport | GO:0022891; substrate-specific transmembrane transporter activity | GO:0016021; integral to membrane | GO:0016020; membrane | GO:0006810; transport | GO:0005576; extracellular region | GO:0005215; transporter activity
GRMZM2G153704_T06	major CHO metabolism.degradation.starch.transporter	arabinose-proton symporter, putative, expressed	AT5G16150.3	PGLCT (PLASTIDIC GLC TRANSLOCATOR); carbohydrate transmembrane transporter/ sugar:hydrogen symporter	19.21903822	12.29075834	6.440883559	3.797366225	Uniprot/SPTREMBL:C0P7D9; Putative uncharacterized protein | Uniprot/SPTREMBL:B4FUK4; Putative uncharacterized protein | GO:0055085; transmembrane transport | GO:0022891; substrate-specific transmembrane transporter activity | GO:0016021; integral to membrane | GO:0016020; membrane | GO:0006810; transport | GO:0005576; extracellular region | GO:0005215; transporter activity
GRMZM2G153704_T07	major CHO metabolism.degradation.starch.transporter	arabinose-proton symporter, putative, expressed	AT5G16150.3	PGLCT (PLASTIDIC GLC TRANSLOCATOR); carbohydrate transmembrane transporter/ sugar:hydrogen symporter	19.21903822	12.29075834	6.440883559	3.797366225	GO:0055085; transmembrane transport | GO:0022891; substrate-specific transmembrane transporter activity | GO:0016021; integral to membrane | GO:0016020; membrane | GO:0006810; transport | GO:0005576; extracellular region | GO:0005215; transporter activity
GRMZM2G153704_T08	major CHO metabolism.degradation.starch.transporter	arabinose-proton symporter, putative, expressed	AT5G16150.3	PGLCT (PLASTIDIC GLC TRANSLOCATOR); carbohydrate transmembrane transporter/ sugar:hydrogen symporter	19.21903822	12.29075834	6.440883559	3.797366225	Uniprot/SPTREMBL:C0P7D9; Putative uncharacterized protein | Uniprot/SPTREMBL:B4FUK4; Putative uncharacterized protein | UniGene:Zm.505; Glucose translocator1 | MaizeGDB_GenBank:AF215854; product:hexose transporter | GO:0055085; transmembrane transport | GO:0022891; substrate-specific transmembrane transporter activity | GO:0016021; integral to membrane | GO:0016020; membrane | GO:0006810; transpo…
GRMZM2G043301_T01	misc.oxidases - copper, flavone etc.	L-ascorbate oxidase homolog precursor, putative, expressed	AT5G66920.1	sks17 (SKU5 Similar 17); copper ion binding / oxidoreductase	7.735536803	0.166243756	0.20473023	0.013289078	Uniprot/SPTREMBL:C0P3W5; Putative uncharacterized protein | UniGene:Zm.21175; Hypothetical protein LOC100382502 | RefSeq_dna:NM_001175239; hypothetical protein LOC100382502 (LOC100382502) mRNA | GO:0055114; oxidation reduction | GO:0055085; transmembrane transport | GO:0016491; oxidoreductase activity | GO:0016020; membrane | GO:0006810; transport | GO:0005507; copper ion binding | GO:0005215; tr…
GRMZM2G043301_T02	misc.oxidases - copper, flavone etc.	L-ascorbate oxidase homolog precursor, putative, expressed	AT5G66920.1	sks17 (SKU5 Similar 17); copper ion binding / oxidoreductase	7.735536803	0.166243756	0.20473023	0.013289078	Uniprot/SPTREMBL:C4JA95; Putative uncharacterized protein | GO:0055114; oxidation reduction | GO:0055085; transmembrane transport | GO:0016491; oxidoreductase activity | GO:0016020; membrane | GO:0006810; transport | GO:0005507; copper ion binding | GO:0005215; transporter activity
GRMZM2G162222_T01	misc.oxidases - copper, flavone etc.	disulfide oxidoreductase/ monooxygenase/ oxidoreductase, putative, expressed	AT5G61290.1	flavin-containing monooxygenase family protein / FMO family protein	3.856665828	0.288418616	0.114044577	0.078513006	GO:0055114; oxidation reduction | GO:0050661; NADP or NADPH binding | GO:0050660; FAD binding | GO:0016491; oxidoreductase activity | GO:0008324; cation transmembrane transporter activity | GO:0006813; potassium ion transport | GO:0004499; flavin-containing monooxygenase activity
GRMZM2G165629_T01	mitochondrial electron transport / ATP synthesis.uncoupling protein	mitochondrial uncoupling protein 2, putative, expressed	AT3G54110.1	PUMP1 (PLANT UNCOUPLING MITOCHONDRIAL PROTEIN 1); binding / oxidative phosphorylation uncoupler	7.705400981	2.906093654	1.381655908	0.74736287	GO:0055085; transmembrane transport | GO:0016020; membrane | GO:0006839; mitochondrial transport | GO:0006810; transport | GO:0005743; mitochondrial inner membrane | GO:0005739; mitochondrion | GO:0005488; binding | GO:0005215; transporter activity
GRMZM2G165629_T02	mitochondrial electron transport / ATP synthesis.uncoupling protein	mitochondrial uncoupling protein 2, putative, expressed	AT3G54110.1	PUMP1 (PLANT UNCOUPLING MITOCHONDRIAL PROTEIN 1); binding / oxidative phosphorylation uncoupler	7.705400981	2.906093654	1.381655908	0.74736287	GO:0055085; transmembrane transport | RefSeq_dna:NM_001155652; mitochondrial uncoupling protein 2 (LOC100282746) nuclear gene encoding mitochondrial protein mRNA | RefSeq_peptide:NP_001149124; mitochondrial uncoupling protein 2 | UniGene:Zm.32210; Mitochondrial uncoupling protein 2 | Uniprot/SPTREMBL:B6TAZ9; Mitochondrial uncoupling protein 2 | GO:0016020; membrane | GO:0006839; mitochondrial tra…
GRMZM2G050394_T05	not assigned	mitochondrial uncoupling protein 2, putative, expressed	AT4G03115.1	binding	9.986040762	5.562915141	2.576376961	1.250674984	Uniprot/SPTREMBL:B4G1G8; Putative uncharacterized protein | UniGene:Zm.146914; TSA: Zea mays contig28397 mRNA sequence | GO:0055085; transmembrane transport | GO:0016020; membrane | GO:0006839; mitochondrial transport | GO:0006810; transport | GO:0005743; mitochondrial inner membrane | GO:0005739; mitochondrion | GO:0005488; binding
GRMZM2G050394_T06	not assigned	mitochondrial uncoupling protein 2, putative, expressed	AT4G03115.1	binding	9.986040762	5.562915141	2.576376961	1.250674984	Uniprot/SPTREMBL:C0P4P8; Putative uncharacterized protein | GO:0055085; transmembrane transport | GO:0016020; membrane | GO:0006839; mitochondrial transport | GO:0006810; transport | GO:0005743; mitochondrial inner membrane | GO:0005739; mitochondrion | GO:0005488; binding | GO:0005215; transporter activity
GRMZM2G050394_T03	not assigned	mitochondrial uncoupling protein 2, putative, expressed	AT4G03115.1	binding	9.986040762	5.562915141	2.576376961	1.250674984	Uniprot/SPTREMBL:B4G1G8; Putative uncharacterized protein | Uniprot/SPTREMBL:B4FFM7; Putative uncharacterized protein | UniGene:Zm.21708; Hypothetical protein LOC100193603 | RefSeq_peptide:NP_001132178; hypothetical protein LOC100193603 | RefSeq_dna:NM_001138706; hypothetical protein LOC100193603 (LOC100193603) mRNA | GO:0055085; transmembrane transport | GO:0016020; membrane | GO:0006839; mitoch…
GRMZM2G050394_T04	not assigned	mitochondrial uncoupling protein 2, putative, expressed	AT4G03115.1	binding	9.986040762	5.562915141	2.576376961	1.250674984	Uniprot/SPTREMBL:B4G1G8; Putative uncharacterized protein | UniGene:Zm.146914; TSA: Zea mays contig28397 mRNA sequence | GO:0055085; transmembrane transport | GO:0016020; membrane | GO:0006839; mitochondrial transport | GO:0006810; transport | GO:0005743; mitochondrial inner membrane | GO:0005739; mitochondrion | GO:0005488; binding
GRMZM2G051894_T01	not assigned	HEAT repeat family protein, expressed	AT1G64960.1	binding	1.733904993	0.176523947	0.179214483	0.173116018	Uniprot/SPTREMBL:B7ZX04; Putative uncharacterized protein | UniGene:Zm.21867; Hypothetical protein LOC100279225 | RefSeq_peptide:NP_001145721; hypothetical protein LOC100279225 | RefSeq_dna:NM_001152249; hypothetical protein LOC100279225 (LOC100279225) mRNA | GO:0055085; transmembrane transport | GO:0016020; membrane | GO:0006810; transport | GO:0005488; binding | GO:0005215; transporter activity…
GRMZM2G055279_T01	not assigned	NA	0	NA	4.050162184	0.279027253	0.123704573	0.066914059	Uniprot/SPTREMBL:B6TTV1; Copper transporter 1 | Uniprot/SPTREMBL:B6SJM6; Copper transporter 1 | UniGene:Zm.41058; Full-length cDNA clone ZM_BFc0093C01 | UniGene:Zm.131507; Copper transporter 1 | RefSeq_peptide:NP_001150814; copper transporter 1 | RefSeq_peptide:NP_001147012; copper transporter 1 | RefSeq_dna:NM_001157342; copper transporter 1 (LOC100284447) mRNA | RefSeq_dna:NM_001153540; copper …
GRMZM2G064563_T01	not assigned	major Facilitator Superfamily protein, expressed	AT1G64650.1	0	36.30210976	8.663039286	0.665274551	0.455243482	Uniprot/SPTREMBL:C0PCT4; Putative uncharacterized protein | UniGene:Zm.85207; Major Facilitator superfamily protein | GO:0055085; transmembrane transport | GO:0016020; membrane | GO:0006821; chloride transport | GO:0006810; transport | GO:0005247; voltage-gated chloride channel activity
GRMZM2G064563_T03	not assigned	major Facilitator Superfamily protein, expressed	AT1G64650.1	0	36.30210976	8.663039286	0.665274551	0.455243482	GO:0055085; transmembrane transport | GO:0016020; membrane | GO:0006821; chloride transport | GO:0006810; transport | GO:0005247; voltage-gated chloride channel activity
GRMZM2G064563_T02	not assigned	major Facilitator Superfamily protein, expressed	AT1G64650.1	0	36.30210976	8.663039286	0.665274551	0.455243482	Uniprot/SPTREMBL:B6TJS0; Major Facilitator superfamily protein | Uniprot/SPTREMBL:B6TBQ0; Major Facilitator superfamily protein | RefSeq_peptide:NP_001149961; major Facilitator superfamily protein | RefSeq_dna:NM_001156489; major Facilitator superfamily protein (LOC100283588) mRNA | GO:0055085; transmembrane transport | GO:0016020; membrane | GO:0006821; chloride transport | GO:0006810; transport…
GRMZM2G067638_T01	not assigned	major Facilitator Superfamily protein, expressed	AT1G64650.1	0	40.23543585	16.03990799	3.874027879	1.040638493	Uniprot/SPTREMBL:B6TJU8; Major Facilitator superfamily protein | GO:0055085; transmembrane transport | GO:0016020; membrane | GO:0006821; chloride transport | GO:0006810; transport | GO:0005247; voltage-gated chloride channel activity
GRMZM2G077669_T01	not assigned	major Facilitator Superfamily protein, expressed	AT1G64650.1	0	95.78729111	32.24874984	3.28079366	0.328130867	Uniprot/SPTREMBL:C0HII2; Putative uncharacterized protein | Uniprot/SPTREMBL:B4FNJ7; Putative uncharacterized protein | GO:0055085; transmembrane transport | GO:0016020; membrane | GO:0006821; chloride transport | GO:0006810; transport | GO:0005247; voltage-gated chloride channel activity
GRMZM2G115049_T01	not assigned	outer mitochondrial membrane protein porin, putative, expressed	AT5G15090.1	VDAC3 (VOLTAGE DEPENDENT ANION CHANNEL 3); voltage-gated anion channel	95.5929341	33.08280325	16.19701612	10.33800296	Uniprot/SPTREMBL:Q9SPD7; Outer mitochondrial membrane protein porinPutative uncharacterized proteinVoltage-dependent anion channel protein 2 ;; | UniGene:Zm.469; Voltage-dependent anion channel protein 2 | RefSeq_peptide:NP_001104949; voltage-dependent anion channel protein 2 | RefSeq_dna:NM_001111479; voltage-dependent anion channel protein 2 (vdac2) nuclear gene encoding mitochondrial protein m…
GRMZM2G303244_T01	not assigned	mechanosensitive ion channel family protein, expressed	AT3G14810.1	MSL5 (MECHANOSENSITIVE CHANNEL OF SMALL CONDUCTANCE-LIKE 5)	2.635542226	0.881424509	0.208073794	0.093883929	UniGene:Zm.37453; Transcribed locus moderately similar to NP_001159287.1 hypothetical protein LOC100304377 [Zea mays] | UniGene:Zm.104228; TSA: Zea mays contig13589 mRNA sequence | GO:0055085; transmembrane transport | GO:0016020; membrane
GRMZM2G034152_T01	polyamine metabolism.degradation.polyamin oxidase	polyamine oxidase precursor, putative, expressed	AT5G13700.1	ATPAO1 (ARABIDOPSIS THALIANA POLYAMINE OXIDASE 1); FAD binding / polyamine oxidase	758.7866479	587.571492	51.07159871	16.45585385	UniGene:Zm.136604; Clone 1538519 mRNA sequence | UniGene:Zm.154876; TSA: Zea mays contig31775 mRNA sequence | UniGene:Zm.300; Polyamine oxidase1 | Uniprot/SPTREMBL:Q546R6; Flavin containing polyamine oxidasePolyamine oxidase Precursor ; | Uniprot/SPTREMBL:Q9FXZ9; Polyamine oxidase Precursor | Uniprot/SWISSPROT:O64411; Polyamine oxidase Precursor (EC 1.5.3.14)(EC 1.5.3.15) | RefSeq_peptide:NP_0011…
GRMZM2G034152_T05	polyamine metabolism.degradation.polyamin oxidase	polyamine oxidase precursor, putative, expressed	AT5G13700.1	ATPAO1 (ARABIDOPSIS THALIANA POLYAMINE OXIDASE 1); FAD binding / polyamine oxidase	758.7866479	587.571492	51.07159871	16.45585385	UniGene:Zm.136604; Clone 1538519 mRNA sequence | GO:0008324; cation transmembrane transporter activity | GO:0006813; potassium ion transport
GRMZM2G093855_T03	protein.degradation.ubiquitin.E2	rhomboid family protein, expressed	AT3G58460.1	ATRBL15 (ARABIDOPSIS RHOMBOID-LIKE PROTEIN 15)	22.73800924	10.83385902	6.865174686	5.37301014	UniGene:Zm.143866; TSA: Zea mays contig59599 mRNA sequence | GO:0033179; proton-transporting V-type ATPase V0 domain | GO:0016021; integral to membrane | GO:0015986; ATP synthesis coupled proton transport | GO:0015078; hydrogen ion transmembrane transporter activity | GO:0004252; serine-type endopeptidase activity
GRMZM2G093855_T01	protein.degradation.ubiquitin.E2	rhomboid family protein, expressed	AT3G58460.1	ATRBL15 (ARABIDOPSIS RHOMBOID-LIKE PROTEIN 15)	22.73800924	10.83385902	6.865174686	5.37301014	UniGene:Zm.143866; TSA: Zea mays contig59599 mRNA sequence | GO:0033179; proton-transporting V-type ATPase V0 domain | GO:0016021; integral to membrane | GO:0015986; ATP synthesis coupled proton transport | GO:0015078; hydrogen ion transmembrane transporter activity | GO:0004252; serine-type endopeptidase activity
GRMZM2G093855_T02	protein.degradation.ubiquitin.E2	rhomboid family protein, expressed	AT3G58460.1	ATRBL15 (ARABIDOPSIS RHOMBOID-LIKE PROTEIN 15)	22.73800924	10.83385902	6.865174686	5.37301014	Uniprot/SPTREMBL:C0HEG2; Putative uncharacterized protein | Uniprot/SPTREMBL:B6TE56; Rhomboid family protein | UniGene:Zm.16625; LOC100192896 | UniGene:Zm.143866; TSA: Zea mays contig59599 mRNA sequence | GO:0033179; proton-transporting V-type ATPase V0 domain | GO:0016021; integral to membrane | GO:0015986; ATP synthesis coupled proton transport | GO:0015078; hydrogen ion transmembrane transport…
GRMZM2G093855_T04	protein.degradation.ubiquitin.E2	rhomboid family protein, expressed	AT3G58460.1	ATRBL15 (ARABIDOPSIS RHOMBOID-LIKE PROTEIN 15)	22.73800924	10.83385902	6.865174686	5.37301014	Uniprot/SPTREMBL:B4FD10; Putative uncharacterized protein | UniGene:Zm.143866; TSA: Zea mays contig59599 mRNA sequence | RefSeq_peptide:NP_001131556; hypothetical protein LOC100192896 | RefSeq_dna:NM_001138084; LOC100192896 (pco089119) mRNA | GO:0033179; proton-transporting V-type ATPase V0 domain | GO:0016021; integral to membrane | GO:0015986; ATP synthesis coupled proton transport | GO:0015078…
GRMZM2G051262_T01	protein.postranslational modification	alpha-1,2-mannosyltransferase ALG9, putative, expressed	AT1G16900.1	sugar binding / transferase, transferring glycosyl groups	32.16733029	13.88011352	4.800829783	4.444104689	Uniprot/SPTREMBL:C0PK01; Putative uncharacterized protein | Uniprot/SPTREMBL:B6T9G4; Alpha-12-mannosyltransferase ALG9Putative uncharacterized protein ; | UniGene:Zm.81114; Alpha-12-mannosyltransferase ALG9 | RefSeq_peptide:NP_001148995; alpha-12-mannosyltransferase ALG9 | RefSeq_dna:NM_001155523; alpha-12-mannosyltransferase ALG9 (LOC100282615) mRNA | GO:0031227; intrinsic to endoplasmic reticul…
GRMZM2G159777_T01	protein.targeting.chloroplast	translocase of chloroplast 34, putative, expressed	AT5G05000.3	TOC34 (TRANSLOCON AT THE OUTER ENVELOPE MEMBRANE OF CHLOROPLASTS 34); GTP binding	65.42775807	63.13211948	9.374437586	9.101319364	Uniprot/SPTREMBL:Q9SBX0; Putative uncharacterized proteinToc34-1 proteinTranslocase of chloroplast 34 ;; | UniGene:Zm.58821; Transcribed locus | UniGene:Zm.261; Translocon at outer membrane of chloroplast34 | RefSeq_peptide:NP_001105522; translocon at outer membrane of chloroplast34 | RefSeq_dna:NM_001112052; translocon at outer membrane of chloroplast34 (toc34) mRNA | MaizeGDB_GenBank:AJ245968; …
GRMZM2G130987_T01	protein.targeting.secretory pathway.unspecified	protein transport protein Sec61 alpha subunit isoform 2, putative, expressed	AT2G34250.2	protein transport protein sec61, putative	181.5545058	61.48684599	40.25926444	36.17311844	Uniprot/SPTREMBL:C4J7M6; Putative uncharacterized protein | Uniprot/SPTREMBL:B8A2Y6; Putative uncharacterized protein | RefSeq_peptide:NP_001146689; hypothetical protein LOC100280289 | GO:0016020; membrane | GO:0015450; P-P-bond-hydrolysis-driven protein transmembrane transporter activity | GO:0015031; protein transport | EntrezGene:100280289; LOC100280289
GRMZM2G130987_T02	protein.targeting.secretory pathway.unspecified	protein transport protein Sec61 alpha subunit isoform 2, putative, expressed	AT2G34250.2	protein transport protein sec61, putative	181.5545058	61.48684599	40.25926444	36.17311844	Uniprot/SPTREMBL:C4J7M6; Putative uncharacterized protein | Uniprot/SPTREMBL:B8A2Y6; Putative uncharacterized protein | UniGene:Zm.93916; LOC100280289 | RefSeq_peptide:NP_001146689; hypothetical protein LOC100280289 | RefSeq_dna:NM_001153217; LOC100280289 (pco109407) mRNA | GO:0016020; membrane | GO:0015450; P-P-bond-hydrolysis-driven protein transmembrane transporter activity | GO:0015031; prote…
GRMZM2G130987_T03	protein.targeting.secretory pathway.unspecified	protein transport protein Sec61 alpha subunit isoform 2, putative, expressed	AT2G34250.2	protein transport protein sec61, putative	181.5545058	61.48684599	40.25926444	36.17311844	GO:0015031; protein transport | GO:0015450; P-P-bond-hydrolysis-driven protein transmembrane transporter activity | GO:0016020; membrane
GRMZM2G130987_T04	protein.targeting.secretory pathway.unspecified	protein transport protein Sec61 alpha subunit isoform 2, putative, expressed	AT2G34250.2	protein transport protein sec61, putative	181.5545058	61.48684599	40.25926444	36.17311844	Uniprot/SPTREMBL:C4J7M6; Putative uncharacterized protein | GO:0016020; membrane | GO:0015450; P-P-bond-hydrolysis-driven protein transmembrane transporter activity | GO:0015031; protein transport
GRMZM2G000816_T02	protein.targeting.unknown	solute carrier family 35, member F1, putative, expressed	AT3G59340.1	unknown protein	11.52133514	5.027005551	1.270740884	1.110361933	Uniprot/SPTREMBL:B6TXS8; Solute carrier family 35 member F1 | UniGene:Zm.19309; LOC100284820 | RefSeq_peptide:NP_001151187; LOC100284820 | RefSeq_dna:NM_001157715; LOC100284820 (pco089834b) mRNA | GO:0055085; transmembrane transport | EntrezGene:100284820; LOC100284820
GRMZM2G000816_T01	protein.targeting.unknown	solute carrier family 35, member F1, putative, expressed	AT3G59340.1	unknown protein	11.52133514	5.027005551	1.270740884	1.110361933	GO:0055085; transmembrane transport | Uniprot/SPTREMBL:B4FJM1; Putative uncharacterized protein
GRMZM2G174773_T02	PS.photorespiration.hydroxypyruvate reductase	glyoxylate reductase, putative, expressed	AT2G45630.2	oxidoreductase family protein	2.227842653	0.141444611	0.125416747	0.050880154	GO:0051287; NAD or NADH binding | GO:0048037; cofactor binding | GO:0016616; oxidoreductase activity acting on the CH-OH group of donors NAD or NADP as acceptor | GO:0008324; cation transmembrane transporter activity | GO:0008152; metabolic process | GO:0006813; potassium ion transport
GRMZM2G174773_T01	PS.photorespiration.hydroxypyruvate reductase	glyoxylate reductase, putative, expressed	AT2G45630.2	oxidoreductase family protein	2.227842653	0.141444611	0.125416747	0.050880154	UniGene:Zm.133422; Clone 371552 mRNA sequence | GO:0051287; NAD or NADH binding | GO:0048037; cofactor binding | GO:0016616; oxidoreductase activity acting on the CH-OH group of donors NAD or NADP as acceptor | GO:0008324; cation transmembrane transporter activity | GO:0008152; metabolic process | GO:0006813; potassium ion transport
GRMZM2G152175_T01	secondary metabolism.flavonoids.flavonols.dihydrokaempferol 4-reductase	dihydroflavonol-4-reductase, putative, expressed	AT4G27250.1	dihydroflavonol 4-reductase family / dihydrokaempferol 4-reductase family	1.352618754	0	0	0.245072741	GO:0044237; cellular metabolic process | GO:0050662; coenzyme binding | GO:0055085; transmembrane transport | RefSeq_dna:NM_001157399; dihydroflavonol-4-reductase (LOC100284504) mRNA | RefSeq_peptide:NP_001150871; dihydroflavonol-4-reductase | UniGene:Zm.133415; Dihydroflavonol-4-reductase | Uniprot/SPTREMBL:B6TUD3; Dihydroflavonol-4-reductase | GO:0016491; oxidoreductase activity | GO:0016020; m…
GRMZM2G357620_T01	signalling.calcium	calcium-transporting ATPase 4, plasma membrane-type, putative, expressed	AT3G57330.1	ACA11 (autoinhibited Ca2+-ATPase 11); calcium-transporting ATPase/ calmodulin binding	37.12191474	26.66660231	7.872676999	3.788213527	GO:0016020; membrane | GO:0016820; hydrolase activity acting on acid anhydrides catalyzing transmembrane movement of substances | UniGene:Zm.123491; Clone 461971 mRNA sequence | UniGene:Zm.144809; TSA: Zea mays contig52239 mRNA sequence | UniGene:Zm.156487; TSA: Zea mays contig56435 mRNA sequence | UniGene:Zm.25864; Transcribed locus moderately similar to XP_002448955.1 hypothetical protein SORBI…
GRMZM2G115420_T01	signalling.receptor kinases.leucine rich repeat II	BRASSINOSTEROID INSENSITIVE 1-associated receptor kinase 1 precursor, putative, expressed	AT1G71830.1	SERK1 (SOMATIC EMBRYOGENESIS RECEPTOR-LIKE KINASE 1); kinase/ transmembrane receptor protein serine/threonine kinase	25.49106657	12.01297739	11.06595474	9.886934578	Uniprot/SPTREMBL:Q94IJ5; SERK2 protein Precursor | Uniprot/SPTREMBL:Q94IJ4; Somatic embryogenesis receptor-like kinase 2 Precursor | Uniprot/SPTREMBL:B7ZZU3; Putative uncharacterized protein | Uniprot/SPTREMBL:B6TCP3; Putative uncharacterized protein | RefSeq_peptide:NP_001105133; somatic embryogenesis receptor-like kinase2 | RefSeq_dna:NM_001111663; somatic embryogenesis receptor-like kinase2 (s…
GRMZM2G056766_T01	stress.abiotic.heat	heat shock protein Hsp88, putative, expressed	AT1G11660.1	heat shock protein, putative	11.40976124	6.015186573	4.062736315	3.787197153	UniGene:Zm.138231; Transcribed locus moderately similar to NP_001058371.2 Os06g0679800 [Oryza sativa Japonica Group] | GO:0055085; transmembrane transport | GO:0016020; membrane | GO:0006810; transport | GO:0005524; ATP binding | GO:0005215; transporter activity
GRMZM2G072850_T01	transport.ABC transporters and multidrug resistance systems	multidrug resistance protein 11, putative, expressed	AT3G28860.1	ABCB19; ATPase, coupled to transmembrane movement of substances / auxin efflux transmembrane transporter	8.558756912	1.292863436	0.148238192	0.047785771	GO:0055085; transmembrane transport | GO:0046677; response to antibiotic | GO:0042626; ATPase activity coupled to transmembrane movement of substances | GO:0019001; guanyl nucleotide binding | GO:0017111; nucleoside-triphosphatase activity | GO:0016887; ATPase activity | GO:0016021; integral to membrane | GO:0015904; tetracycline transport | GO:0000166; nucleotide binding | GO:0004871; signal tra…
GRMZM2G072850_T02	transport.ABC transporters and multidrug resistance systems	multidrug resistance protein 11, putative, expressed	AT3G28860.1	ABCB19; ATPase, coupled to transmembrane movement of substances / auxin efflux transmembrane transporter	8.558756912	1.292863436	0.148238192	0.047785771	GO:0055085; transmembrane transport | GO:0042626; ATPase activity coupled to transmembrane movement of substances | GO:0019001; guanyl nucleotide binding | GO:0017111; nucleoside-triphosphatase activity | GO:0016887; ATPase activity | GO:0016021; integral to membrane | GO:0007186; G-protein coupled receptor protein signaling pathway | GO:0006810; transport | GO:0005524; ATP binding | GO:0004871; …
GRMZM2G315375_T01	transport.ABC transporters and multidrug resistance systems	multidrug resistance protein 1, putative, expressed	AT2G36910.1	ABCB1 (ATP BINDING CASSETTE SUBFAMILY B1); ATPase, coupled to transmembrane movement of substances / auxin efflux transmembrane transporter/ calmodulin binding	105.1217156	9.921891375	1.489538629	0.062946766	Uniprot/SPTREMBL:Q6UNK5; PGP1 | Uniprot/SPTREMBL:C0PL79; Putative uncharacterized protein | UniGene:Zm.72702; Hypothetical protein LOC100384057 | UniGene:Zm.140698; Transcribed locus strongly similar to XP_002445666.1 hypothetical protein SORBIDRAFT_07g023730 [Sorghum bicolor] | UniGene:Zm.139803; Transcribed locus moderately similar to XP_002445666.1 hypothetical protein SORBIDRAFT_07g023730 [So…
GRMZM2G315375_T02	transport.ABC transporters and multidrug resistance systems	multidrug resistance protein 1, putative, expressed	AT2G36910.1	ABCB1 (ATP BINDING CASSETTE SUBFAMILY B1); ATPase, coupled to transmembrane movement of substances / auxin efflux transmembrane transporter/ calmodulin binding	105.1217156	9.921891375	1.489538629	0.062946766	UniGene:Zm.29709; Transcribed locus weakly similar to XP_001634268.1 predicted protein [Nematostella vectensis] | GO:0055085; transmembrane transport | GO:0042626; ATPase activity coupled to transmembrane movement of substances | GO:0017111; nucleoside-triphosphatase activity | GO:0016021; integral to membrane | GO:0006810; transport | GO:0005524; ATP binding | GO:0000166; nucleotide binding
GRMZM2G022642_T02	transport.amino acids	amino-acid permease C584.13, putative, expressed	AT2G01170.1	BAT1 (BIDIRECTIONAL AMINO ACID TRANSPORTER 1); amino acid transmembrane transporter	27.6965496	20.98571434	5.193002232	2.794712633	UniGene:Zm.134707; Transcribed locus moderately similar to NP_001132503.1 hypothetical protein LOC100193963 [Zea mays] | GO:0055085; transmembrane transport | GO:0045156; electron transporter transferring electrons within the cyclic electron transport pathway of photosynthesis activity | GO:0030077; plasma membrane light-harvesting complex | GO:0019684; photosynthesis light reaction | GO:0016021;…
GRMZM2G022642_T03	transport.amino acids	amino-acid permease C584.13, putative, expressed	AT2G01170.1	BAT1 (BIDIRECTIONAL AMINO ACID TRANSPORTER 1); amino acid transmembrane transporter	27.6965496	20.98571434	5.193002232	2.794712633	GO:0045156; electron transporter transferring electrons within the cyclic electron transport pathway of photosynthesis activity | GO:0055085; transmembrane transport | RefSeq_dna:NM_001139031; LOC100193963 (si486073c04) mRNA | RefSeq_peptide:NP_001132503; hypothetical protein LOC100193963 | UniGene:Zm.134707; Transcribed locus moderately similar to NP_001132503.1 hypothetical protein LOC100193963…
GRMZM2G022642_T05	transport.amino acids	amino-acid permease C584.13, putative, expressed	AT2G01170.1	BAT1 (BIDIRECTIONAL AMINO ACID TRANSPORTER 1); amino acid transmembrane transporter	27.6965496	20.98571434	5.193002232	2.794712633	Uniprot/SPTREMBL:B4FG82; Putative uncharacterized protein | GO:0055085; transmembrane transport | GO:0016020; membrane | GO:0006810; transport
GRMZM2G022642_T06	transport.amino acids	amino-acid permease C584.13, putative, expressed	AT2G01170.1	BAT1 (BIDIRECTIONAL AMINO ACID TRANSPORTER 1); amino acid transmembrane transporter	27.6965496	20.98571434	5.193002232	2.794712633	Uniprot/SPTREMBL:B4FZP4; Putative uncharacterized protein | UniGene:Zm.134707; Transcribed locus moderately similar to NP_001132503.1 hypothetical protein LOC100193963 [Zea mays] | GO:0055085; transmembrane transport | GO:0045156; electron transporter transferring electrons within the cyclic electron transport pathway of photosynthesis activity | GO:0030077; plasma membrane light-harvesting compl…
GRMZM2G022642_T07	transport.amino acids	amino-acid permease C584.13, putative, expressed	AT2G01170.1	BAT1 (BIDIRECTIONAL AMINO ACID TRANSPORTER 1); amino acid transmembrane transporter	27.6965496	20.98571434	5.193002232	2.794712633	GO:0030077; plasma membrane light-harvesting complex | GO:0045156; electron transporter transferring electrons within the cyclic electron transport pathway of photosynthesis activity | GO:0055085; transmembrane transport | UniGene:Zm.134707; Transcribed locus moderately similar to NP_001132503.1 hypothetical protein LOC100193963 [Zea mays] | Uniprot/SPTREMBL:B4FK32; Putative uncharacterized prote…
GRMZM2G092433_T01	transport.amino acids	high-affinity cationic amino acid transporter 1, putative, expressed	AT1G58030.1	CAT2 (CATIONIC AMINO ACID TRANSPORTER 2); amino acid transmembrane transporter	4.889175891	2.734491414	1.495635104	1.093158603	GO:0055085; transmembrane transport | GO:0016020; membrane | GO:0015171; amino acid transmembrane transporter activity | GO:0006865; amino acid transport | GO:0006810; transport | GO:0006412; translation | GO:0005840; ribosome | GO:0005622; intracellular | GO:0003735; structural constituent of ribosome
GRMZM2G404888_T01	transport.amino acids	cationic amino acid transporter 4, putative, expressed	AT1G17120.1	CAT8 (CATIONIC AMINO ACID TRANSPORTER 8); basic amino acid transmembrane transporter/ cationic amino acid transmembrane transporter	4.82053353	2.636138677	0.322933492	0.124771866	Uniprot/SPTREMBL:C4J266; Putative uncharacterized protein | UniGene:Zm.33914; Hypothetical protein LOC100275710 | RefSeq_dna:NM_001149735; hypothetical protein LOC100275710 (LOC100275710) mRNA | GO:0055085; transmembrane transport | GO:0016020; membrane | GO:0006810; transport
GRMZM2G404888_T02	transport.amino acids	cationic amino acid transporter 4, putative, expressed	AT1G17120.1	CAT8 (CATIONIC AMINO ACID TRANSPORTER 8); basic amino acid transmembrane transporter/ cationic amino acid transmembrane transporter	4.82053353	2.636138677	0.322933492	0.124771866	Uniprot/SPTREMBL:C4J266; Putative uncharacterized protein | RefSeq_dna:NM_001149735; hypothetical protein LOC100275710 (LOC100275710) mRNA | GO:0055085; transmembrane transport | GO:0016020; membrane | GO:0006810; transport
GRMZM2G040017_T01	transport.calcium	vacuolar cation/proton exchanger 3, putative, expressed	AT3G13320.1	CAX2 (CATION EXCHANGER 2); calcium:cation antiporter/ calcium:hydrogen antiporter	13.20188253	8.108285885	4.667480799	3.279359009	Uniprot/SPTREMBL:Q94IH5; Ca2+/H+ antiporter | Uniprot/SPTREMBL:B6U9R1; Vacuolar cation/proton exchanger 3 | Uniprot/SPTREMBL:B4FFP3; Putative uncharacterized protein | RefSeq_peptide:NP_001104860; LOC541635 | GO:0055085; transmembrane transport | GO:0016021; integral to membrane | GO:0008324; cation transmembrane transporter activity | GO:0006812; cation transport | EntrezGene:541635; LOC541635
GRMZM2G040017_T02	transport.calcium	vacuolar cation/proton exchanger 3, putative, expressed	AT3G13320.1	CAX2 (CATION EXCHANGER 2); calcium:cation antiporter/ calcium:hydrogen antiporter	13.20188253	8.108285885	4.667480799	3.279359009	RefSeq_peptide:NP_001104860; LOC541635 | UniGene:Zm.7306; LOC541635 | Uniprot/SPTREMBL:B4FFP3; Putative uncharacterized protein | Uniprot/SPTREMBL:B6U9R1; Vacuolar cation/proton exchanger 3 | Uniprot/SPTREMBL:Q94IH5; Ca2+/H+ antiporter | RefSeq_dna:NM_001111390; LOC541635 (pco139871a) mRNA | GO:0055085; transmembrane transport | EntrezGene:541635; LOC541635 | GenBank:AB044567; product:Ca2+/H+ ant…
GRMZM2G140328_T01	transport.calcium	calcium-transporting ATPase 9, plasma membrane-type, putative, expressed	AT5G57110.2	ACA8 (AUTOINHIBITED CA2+ -ATPASE, ISOFORM 8); calcium-transporting ATPase/ calmodulin binding / protein self-association	21.70019631	11.85207613	4.582377079	3.276217524	GO:0015085; calcium ion transmembrane transporter activity | GO:0015662; ATPase activity coupled to transmembrane movement of ions phosphorylative mechanism | GO:0016020; membrane | GO:0016820; hydrolase activity acting on acid anhydrides catalyzing transmembrane movement of substances | GO:0008152; metabolic process | GO:0006816; calcium ion transport | GO:0006812; cation transport | GO:0006754;…
GRMZM2G140328_T02	transport.calcium	calcium-transporting ATPase 9, plasma membrane-type, putative, expressed	AT5G57110.2	ACA8 (AUTOINHIBITED CA2+ -ATPASE, ISOFORM 8); calcium-transporting ATPase/ calmodulin binding / protein self-association	21.70019631	11.85207613	4.582377079	3.276217524	GO:0015085; calcium ion transmembrane transporter activity | GO:0015662; ATPase activity coupled to transmembrane movement of ions phosphorylative mechanism | GO:0016020; membrane | GO:0016820; hydrolase activity acting on acid anhydrides catalyzing transmembrane movement of substances | UniGene:Zm.97315; TSA: Zea mays contig23190 mRNA sequence | GO:0008152; metabolic process | GO:0006816; calciu…
GRMZM2G140328_T03	transport.calcium	calcium-transporting ATPase 9, plasma membrane-type, putative, expressed	AT5G57110.2	ACA8 (AUTOINHIBITED CA2+ -ATPASE, ISOFORM 8); calcium-transporting ATPase/ calmodulin binding / protein self-association	21.70019631	11.85207613	4.582377079	3.276217524	GO:0016820; hydrolase activity acting on acid anhydrides catalyzing transmembrane movement of substances | GO:0016020; membrane | GO:0015662; ATPase activity coupled to transmembrane movement of ions phosphorylative mechanism | GO:0015085; calcium ion transmembrane transporter activity | GO:0008152; metabolic process | GO:0006816; calcium ion transport | GO:0006812; cation transport | GO:0006754;…
GRMZM2G140328_T04	transport.calcium	calcium-transporting ATPase 9, plasma membrane-type, putative, expressed	AT5G57110.2	ACA8 (AUTOINHIBITED CA2+ -ATPASE, ISOFORM 8); calcium-transporting ATPase/ calmodulin binding / protein self-association	21.70019631	11.85207613	4.582377079	3.276217524	GO:0015085; calcium ion transmembrane transporter activity | GO:0015662; ATPase activity coupled to transmembrane movement of ions phosphorylative mechanism | GO:0016020; membrane | GO:0016820; hydrolase activity acting on acid anhydrides catalyzing transmembrane movement of substances | GO:0008152; metabolic process | GO:0006816; calcium ion transport | GO:0006812; cation transport | GO:0006754;…
GRMZM2G168108_T01	transport.calcium	K-exchanger-like protein, putative, expressed	AT5G17860.1	CAX7 (calcium exchanger 7); calcium:sodium antiporter/ cation:cation antiporter	5.68604005	1.609440296	0.129502413	0.024723606	Uniprot/SPTREMBL:B6ST67; K-exchanger-like protein | UniGene:Zm.21595; K-exchanger-like protein | RefSeq_peptide:NP_001147600; K-exchanger-like protein | RefSeq_dna:NM_001154128; K-exchanger-like protein (LOC100281209) mRNA | GO:0055085; transmembrane transport | GO:0016021; integral to membrane | EntrezGene:100281209; K-exchanger-like protein
GRMZM2G391042_T01	transport.calcium	calcium-transporting ATPase 9, plasma membrane-type, putative, expressed	AT5G57110.2	ACA8 (AUTOINHIBITED CA2+ -ATPASE, ISOFORM 8); calcium-transporting ATPase/ calmodulin binding / protein self-association	3.012203634	2.763957925	0.795394424	0.680273419	UniGene:Zm.7379; TSA: Zea mays contig24615 mRNA sequence | UniGene:Zm.145813; TSA: Zea mays contig44396 mRNA sequence | GO:0016820; hydrolase activity acting on acid anhydrides catalyzing transmembrane movement of substances | GO:0016020; membrane | GO:0015662; ATPase activity coupled to transmembrane movement of ions phosphorylative mechanism | GO:0015085; calcium ion transmembrane transporter a…
GRMZM2G391042_T02	transport.calcium	calcium-transporting ATPase 9, plasma membrane-type, putative, expressed	AT5G57110.2	ACA8 (AUTOINHIBITED CA2+ -ATPASE, ISOFORM 8); calcium-transporting ATPase/ calmodulin binding / protein self-association	3.012203634	2.763957925	0.795394424	0.680273419	GO:0016820; hydrolase activity acting on acid anhydrides catalyzing transmembrane movement of substances | GO:0016020; membrane | GO:0015662; ATPase activity coupled to transmembrane movement of ions phosphorylative mechanism | GO:0015085; calcium ion transmembrane transporter activity | GO:0006816; calcium ion transport | GO:0006812; cation transport | GO:0006754; ATP biosynthetic process | GO:0…
GRMZM2G005791_T01	transport.cyclic nucleotide or calcium regulated channels	cyclic nucleotide-gated ion channel 14, putative, expressed	AT4G30360.1	ATCNGC17; calmodulin binding / cyclic nucleotide binding / ion channel	6.733756147	5.774645774	3.641094427	3.533411779	GO:0055085; transmembrane transport | GO:0016020; membrane | GO:0006813; potassium ion transport | GO:0006811; ion transport | GO:0005249; voltage-gated potassium channel activity | GO:0005216; ion channel activity
GRMZM2G090528_T02	transport.cyclic nucleotide or calcium regulated channels	cyclic nucleotide-gated ion channel 2, putative, expressed	AT5G54250.2	ATCNGC4 (CYCLIC NUCLEOTIDE-GATED CATION CHANNEL 4); calmodulin binding / cation channel/ cation transmembrane transporter/ cyclic nucleotide binding	4.817309579	0.217549188	0.366505247	0.046953798	GO:0055085; transmembrane transport | GO:0016020; membrane | GO:0006811; ion transport | GO:0005216; ion channel activity
GRMZM2G090528_T01	transport.cyclic nucleotide or calcium regulated channels	cyclic nucleotide-gated ion channel 2, putative, expressed	AT5G54250.2	ATCNGC4 (CYCLIC NUCLEOTIDE-GATED CATION CHANNEL 4); calmodulin binding / cation channel/ cation transmembrane transporter/ cyclic nucleotide binding	4.817309579	0.217549188	0.366505247	0.046953798	Uniprot/SPTREMBL:C4J8L1; Putative uncharacterized protein | Uniprot/SPTREMBL:B8A147; Putative uncharacterized protein | Uniprot/SPTREMBL:B6U115; Cyclic nucleotide-gated ion channel 2 | UniGene:Zm.43548; Cyclic nucleotide-gated ion channel 2 | RefSeq_peptide:NP_001151488; cyclic nucleotide-gated ion channel 2 | RefSeq_dna:NM_001158016; cyclic nucleotide-gated ion channel 2 (LOC100285121) mRNA | GO…
GRMZM2G041980_T02	transport.Major Intrinsic Proteins.NIP	aquaporin NIP1.2, putative, expressed	AT4G18910.1	NIP1;2 (NOD26-LIKE INTRINSIC PROTEIN 1;2); arsenite transmembrane transporter/ water channel	284.4250592	55.78293182	1.329619955	0.604141166	Uniprot/SWISSPROT:Q9ATN4; Aquaporin NIP1-1 (NOD26-like intrinsic protein 1-1)(ZmNIP1-1)(ZmNIP1;1) | Uniprot/SPTREMBL:B6TH33; Aquaporin NIP1.2Putative uncharacterized protein ; | Uniprot/SPTREMBL:B4FUJ5; Putative uncharacterized protein | UniGene:Zm.67014; NOD26-like membrane intrinsic protein1 | UniGene:Zm.100657; Transcribed locus moderately similar to NP_001105721.1 aquaporin NIP1-1 [Zea mays] …
GRMZM2G041980_T03	transport.Major Intrinsic Proteins.NIP	aquaporin NIP1.2, putative, expressed	AT4G18910.1	NIP1;2 (NOD26-LIKE INTRINSIC PROTEIN 1;2); arsenite transmembrane transporter/ water channel	284.4250592	55.78293182	1.329619955	0.604141166	UniGene:Zm.100657; Transcribed locus moderately similar to NP_001105721.1 aquaporin NIP1-1 [Zea mays] | GO:0055085; transmembrane transport | GO:0016021; integral to membrane | GO:0016020; membrane | GO:0006810; transport | GO:0005215; transporter activity
GRMZM2G063253_T01	transport.Major Intrinsic Proteins.unspecified	integral membrane protein like, putative, expressed	AT1G06890.2	transporter-related	64.61786969	13.19022629	4.108017004	3.627293445	UniGene:Zm.118218; Hypothetical protein LOC100274586 | RefSeq_peptide:NP_001142411; hypothetical protein LOC100274586 | RefSeq_dna:NM_001148939; hypothetical protein LOC100274586 (LOC100274586) mRNA | GO:0055085; transmembrane transport | GO:0009405; pathogenesis | GO:0009289; pilus | EntrezGene:100274586; hypothetical protein LOC100274586 | Uniprot/SPTREMBL:B4G114; Integral membrane protein like…
GRMZM2G063511_T01	transport.Major Intrinsic Proteins.unspecified	integral membrane protein like, putative, expressed	AT1G06890.2	transporter-related	38.37748521	14.23395615	5.041695712	3.782558227	Uniprot/SPTREMBL:C0PCW8; Putative uncharacterized protein | Uniprot/SPTREMBL:B6T4J2; Integral membrane protein like | UniGene:Zm.8700; Integral membrane protein like | RefSeq_peptide:NP_001148556; integral membrane protein like | RefSeq_dna:NM_001155084; integral membrane protein like (LOC100282172) mRNA | GO:0055085; transmembrane transport | GO:0009405; pathogenesis | GO:0009289; pilus | Entrez…
GRMZM2G078757_T01	transport.membrane system unknown	sugar porter/ transporter, putative, expressed	AT2G13100.1	glycerol-3-phosphate transporter, putative / glycerol 3-phosphate permease, putative	6.677793486	1.683500335	0.676394955	0.643434223	UniGene:Zm.2023; TSA: Zea mays contig33552 mRNA sequence | GO:0055085; transmembrane transport | GO:0006412; translation | GO:0005840; ribosome | GO:0005622; intracellular | GO:0003735; structural constituent of ribosome
GRMZM2G005499_T01	transport.metabolite transporters at the envelope membrane	solute carrier family 35 member C2, putative, expressed	AT1G06470.2	phosphate translocator-related	5.00398855	3.221934564	2.122711432	1.062020357	Uniprot/SPTREMBL:B4FA18; Putative uncharacterized proteinSolute carrier family 35 member C2 ; | UniGene:Zm.118517; Hypothetical protein LOC100191756 | RefSeq_peptide:NP_001130655; hypothetical protein LOC100191756 | RefSeq_dna:NM_001137183; hypothetical protein LOC100191756 (LOC100191756) mRNA | GO:0055085; transmembrane transport | EntrezGene:100191756; hypothetical protein LOC100191756
GRMZM2G047404_T01	transport.metabolite transporters at the envelope membrane	triose phosphate/phosphate translocator, non-green plastid,chloroplast precursor, putative, expressed	AT5G33320.1	CUE1 (CAB UNDEREXPRESSED 1); antiporter/ triose-phosphate transmembrane transporter	108.8637029	11.77043868	2.361051453	1.971518821	RefSeq_dna:NM_001112482; plastid phosphate/phosphoenolpyruvate translocator1 (ppt1) mRNA | RefSeq_peptide:NP_001105952; plastid phosphate/phosphoenolpyruvate translocator1 | UniGene:Zm.66289; Plastid phosphate/phosphoenolpyruvate translocator1 | Uniprot/SPTREMBL:B6T9N3; Triose phosphate/phosphate translocator non-green plastidchloroplast | Uniprot/SPTREMBL:P93642; Phosphate/phosphoenolpyruvate tr…
GRMZM2G102521_T02	transport.metabolite transporters at the envelope membrane	solute carrier family 35 member C2, putative, expressed	AT1G06470.2	phosphate translocator-related	7.724308186	1.139401372	0.156230345	0.088733234	GO:0055085; transmembrane transport | UniGene:Zm.139601; Transcribed locus moderately similar to NP_001130655.1 hypothetical protein LOC100191756 [Zea mays]
GRMZM2G127591_T01	transport.metabolite transporters at the envelope membrane	organic anion transporter, putative, expressed	AT1G77610.1	glucose-6-phosphate/phosphate translocator-related	34.41532585	15.08150966	12.17936834	10.10125906	Uniprot/SPTREMBL:B8A1S4; Putative uncharacterized protein | Uniprot/SPTREMBL:B4G1R1; Organic anion transporterPutative uncharacterized protein ; | RefSeq_peptide:NP_001146487; hypothetical protein LOC100280075 | GO:0055085; transmembrane transport | GO:0016020; membrane | GO:0006096; glycolysis | GO:0004618; phosphoglycerate kinase activity | EntrezGene:100280075; LOC100280075
GRMZM2G135186_T01	transport.metabolite transporters at the envelope membrane	ADP,ATP carrier protein, mitochondrial precursor, putative, expressed	AT3G08580.2	AAC1 (ADP/ATP CARRIER 1); ATP:ADP antiporter/ binding	394.9671963	160.1396905	108.3007263	91.87556508	RefSeq_peptide:NP_001105431; ADPATP carrier protein 1 mitochondrial precursor | RefSeq_peptide:NP_001105434; ADPATP carrier protein 2 mitochondrial precursor | Uniprot/SPTREMBL:B4G178; ADPATP carrier proteinPutative uncharacterized protein ; | Uniprot/SPTREMBL:B8A090; Putative uncharacterized protein | Uniprot/SWISSPROT:P04709; ADPATP carrier protein 1 mitochondrial Precursor (ADP/ATP translocase…
GRMZM2G135186_T02	transport.metabolite transporters at the envelope membrane	ADP,ATP carrier protein, mitochondrial precursor, putative, expressed	AT3G08580.2	AAC1 (ADP/ATP CARRIER 1); ATP:ADP antiporter/ binding	394.9671963	160.1396905	108.3007263	91.87556508	RefSeq_peptide:NP_001105431; ADPATP carrier protein 1 mitochondrial precursor | RefSeq_peptide:NP_001105434; ADPATP carrier protein 2 mitochondrial precursor | Uniprot/SPTREMBL:B4G178; ADPATP carrier proteinPutative uncharacterized protein ; | Uniprot/SPTREMBL:B8A090; Putative uncharacterized protein | Uniprot/SWISSPROT:P04709; ADPATP carrier protein 1 mitochondrial Precursor (ADP/ATP translocase…
GRMZM2G135186_T03	transport.metabolite transporters at the envelope membrane	ADP,ATP carrier protein, mitochondrial precursor, putative, expressed	AT3G08580.2	AAC1 (ADP/ATP CARRIER 1); ATP:ADP antiporter/ binding	394.9671963	160.1396905	108.3007263	91.87556508	RefSeq_peptide:NP_001105431; ADPATP carrier protein 1 mitochondrial precursor | RefSeq_peptide:NP_001105434; ADPATP carrier protein 2 mitochondrial precursor | UniGene:Zm.75; Adenine nucleotide translocator | Uniprot/SPTREMBL:B4G178; ADPATP carrier proteinPutative uncharacterized protein ; | Uniprot/SPTREMBL:B8A090; Putative uncharacterized protein | Uniprot/SWISSPROT:P04709; ADPATP carrier prote…
GRMZM2G135186_T04	transport.metabolite transporters at the envelope membrane	ADP,ATP carrier protein, mitochondrial precursor, putative, expressed	AT3G08580.2	AAC1 (ADP/ATP CARRIER 1); ATP:ADP antiporter/ binding	394.9671963	160.1396905	108.3007263	91.87556508	UniGene:Zm.147806; TSA: Zea mays contig24575 mRNA sequence | GO:0055085; transmembrane transport | GO:0016020; membrane | GO:0006810; transport | GO:0005743; mitochondrial inner membrane | GO:0005488; binding | GO:0005215; transporter activity
GRMZM2G167283_T01	transport.metabolite transporters at the envelope membrane	solute carrier family 35 member C2, putative, expressed	AT1G06470.2	phosphate translocator-related	4.14898172	3.110113849	1.071225804	0.712390709	Uniprot/SPTREMBL:B4FT30; Putative uncharacterized protein | UniGene:Zm.4263; LOC100273124 | RefSeq_peptide:NP_001141043; hypothetical protein LOC100273124 | RefSeq_dna:NM_001147571; LOC100273124 (cl2967_1) mRNA | GO:0055085; transmembrane transport | EntrezGene:100273124; LOC100273124
GRMZM2G443265_T01	transport.metabolite transporters at the envelope membrane	organic anion transporter, putative, expressed	AT3G11320.1	organic anion transmembrane transporter	46.06929772	23.11397482	8.360277459	6.518165048	Uniprot/SPTREMBL:B7ZX65; Putative uncharacterized protein | Uniprot/SPTREMBL:B6SZ48; Putative uncharacterized protein | Uniprot/SPTREMBL:B4F896; Putative uncharacterized protein | RefSeq_peptide:NP_001130193; hypothetical protein LOC100191287 | GO:0055085; transmembrane transport | EntrezGene:100191287; LOC100191287
GRMZM2G443265_T02	transport.metabolite transporters at the envelope membrane	organic anion transporter, putative, expressed	AT3G11320.1	organic anion transmembrane transporter	46.06929772	23.11397482	8.360277459	6.518165048	Uniprot/SPTREMBL:B6SZ48; Putative uncharacterized protein | UniGene:Zm.68055; LOC100191287 | RefSeq_dna:NM_001136721; LOC100191287 (pco085840) mRNA | GO:0055085; transmembrane transport
GRMZM2G447617_T01	transport.metabolite transporters at the envelope membrane	organic anion transporter, putative, expressed	AT3G11320.1	organic anion transmembrane transporter	39.84255482	14.23545084	5.840030081	5.316330077	Uniprot/SPTREMBL:B6TX95; Organic anion transporterPutative uncharacterized protein ; | RefSeq_peptide:NP_001151135; organic anion transporter | GO:0055085; transmembrane transport | EntrezGene:100284768; organic anion transporter
GRMZM2G447617_T02	transport.metabolite transporters at the envelope membrane	organic anion transporter, putative, expressed	AT3G11320.1	organic anion transmembrane transporter	39.84255482	14.23545084	5.840030081	5.316330077	Uniprot/SPTREMBL:B6TX95; Organic anion transporterPutative uncharacterized protein ; | UniGene:Zm.118555; Organic anion transporter | RefSeq_peptide:NP_001151135; organic anion transporter | RefSeq_dna:NM_001157663; organic anion transporter (LOC100284768) mRNA | GO:0055085; transmembrane transport | EntrezGene:100284768; organic anion transporter
GRMZM2G447617_T03	transport.metabolite transporters at the envelope membrane	organic anion transporter, putative, expressed	AT3G11320.1	organic anion transmembrane transporter	39.84255482	14.23545084	5.840030081	5.316330077	GO:0055085; transmembrane transport
GRMZM2G000741_T01	transport.metabolite transporters at the mitochondrial membrane	mitochondrial carrier-like protein, putative, expressed	AT1G72820.1	mitochondrial substrate carrier family protein	11.58621115	2.229247914	0.943924698	0.377364851	GO:0016020; membrane | GO:0055085; transmembrane transport | RefSeq_dna:NM_001176788; hypothetical protein LOC100384216 (LOC100384216) mRNA | RefSeq_peptide:NP_001170259; hypothetical protein LOC100384216 | UniGene:Zm.141450; Transcribed locus moderately similar to NP_001049133.2 Os03g0175200 [Oryza sativa Japonica Group] | UniGene:Zm.64756; Hypothetical protein LOC100384216 | Uniprot/SPTREMBL:C0…
GRMZM2G015571_T01	transport.metabolite transporters at the mitochondrial membrane	protein brittle-1, chloroplast precursor, putative, expressed	AT5G64970.1	mitochondrial substrate carrier family protein	13.51579235	10.34432319	5.888969727	5.815158396	Uniprot/SPTREMBL:B4FH19; Putative uncharacterized protein | RefSeq_peptide:NP_001132533; hypothetical protein LOC100193996 | GO:0055085; transmembrane transport | GO:0016020; membrane | GO:0006810; transport | GO:0005743; mitochondrial inner membrane | GO:0005488; binding | EntrezGene:100193996; hypothetical protein LOC100193996
GRMZM2G015571_T02	transport.metabolite transporters at the mitochondrial membrane	protein brittle-1, chloroplast precursor, putative, expressed	AT5G64970.1	mitochondrial substrate carrier family protein	13.51579235	10.34432319	5.888969727	5.815158396	Uniprot/SPTREMBL:B4FH19; Putative uncharacterized protein | UniGene:Zm.75280; Hypothetical protein LOC100193996 | RefSeq_peptide:NP_001132533; hypothetical protein LOC100193996 | RefSeq_dna:NM_001139061; hypothetical protein LOC100193996 (LOC100193996) mRNA | GO:0055085; transmembrane transport | GO:0016020; membrane | GO:0006810; transport | GO:0005743; mitochondrial inner membrane | GO:0005488;…
GRMZM2G032182_T02	transport.metabolite transporters at the mitochondrial membrane	mitochondrial RNA-splicing protein MRS3, putative, expressed	AT1G07030.1	mitochondrial substrate carrier family protein	15.35277201	9.855535358	5.139109853	4.702457591	UniGene:Zm.64413; Transcribed locus | UniGene:Zm.149547; TSA: Zea mays contig16592 mRNA sequence | GO:0055085; transmembrane transport | GO:0016020; membrane | GO:0006810; transport | GO:0005488; binding
GRMZM2G032182_T01	transport.metabolite transporters at the mitochondrial membrane	mitochondrial RNA-splicing protein MRS3, putative, expressed	AT1G07030.1	mitochondrial substrate carrier family protein	15.35277201	9.855535358	5.139109853	4.702457591	Uniprot/SPTREMBL:B6TZ46; Mitochondrial RNA-splicing protein MRS3 | Uniprot/SPTREMBL:B4FYW8; Putative uncharacterized protein | UniGene:Zm.19461; Mitochondrial RNA-splicing protein MRS3 | UniGene:Zm.149547; TSA: Zea mays contig16592 mRNA sequence | RefSeq_peptide:NP_001151324; mitochondrial RNA-splicing protein MRS3 | RefSeq_dna:NM_001157852; mitochondrial RNA-splicing protein MRS3 (LOC100284957) …
GRMZM2G047457_T01	transport.metabolite transporters at the mitochondrial membrane	mitochondrial RNA-splicing protein MRS3, putative, expressed	AT5G42130.1	mitochondrial substrate carrier family protein	32.00238413	8.747037911	5.794863656	4.791209331	GO:0042309; homoiothermy | GO:0050825; ice binding | GO:0050826; response to freezing | GO:0055085; transmembrane transport | UniGene:Zm.26367; Clone 312268 mRNA sequence | GO:0016020; membrane | GO:0006810; transport | GO:0006412; translation | GO:0005840; ribosome | GO:0005743; mitochondrial inner membrane | GO:0005622; intracellular | GO:0005488; binding | GO:0003735; structural constituent of…
GRMZM2G061469_T02	transport.metabolite transporters at the mitochondrial membrane	C4-dicarboxylate transporter/malic acid transport protein, expressed	AT5G24030.1	SLAH3 (SLAC1 HOMOLOGUE 3); transporter	12.6891569	2.033665998	0.178654574	0.115965019	Uniprot/SPTREMBL:B6SWN8; C4-dicarboxylate transporter/malic acid transport protein | RefSeq_peptide:NP_001147966; LOC100281575 | GO:0055085; transmembrane transport | GO:0016021; integral to membrane | EntrezGene:100281575; LOC100281575
GRMZM2G061469_T01	transport.metabolite transporters at the mitochondrial membrane	C4-dicarboxylate transporter/malic acid transport protein, expressed	AT5G24030.1	SLAH3 (SLAC1 HOMOLOGUE 3); transporter	12.6891569	2.033665998	0.178654574	0.115965019	Uniprot/SPTREMBL:B6SWN8; C4-dicarboxylate transporter/malic acid transport protein | UniGene:Zm.85911; LOC100281575 | RefSeq_peptide:NP_001147966; LOC100281575 | RefSeq_dna:NM_001154494; LOC100281575 (umc2631) mRNA | GO:0055085; transmembrane transport | GO:0016021; integral to membrane | EntrezGene:100281575; LOC100281575
GRMZM2G094444_T01	transport.metabolite transporters at the mitochondrial membrane	mitochondrial carrier YMR166C, putative, expressed	AT1G74240.1	mitochondrial substrate carrier family protein	3.959093622	0.880580904	0.873260317	0.800237522	Uniprot/SPTREMBL:B7ZYC8; Putative uncharacterized protein | Uniprot/SPTREMBL:B6T2V1; Mitochondrial carrier YMR166C | UniGene:Zm.15510; LOC100282042 | RefSeq_peptide:NP_001148427; LOC100282042 | RefSeq_dna:NM_001154955; LOC100282042 (si606074b10b) nuclear gene encoding mitochondrial protein mRNA | GO:0055085; transmembrane transport | GO:0016020; membrane | GO:0006810; transport | GO:0005743; mito…
GRMZM2G094444_T02	transport.metabolite transporters at the mitochondrial membrane	mitochondrial carrier YMR166C, putative, expressed	AT1G74240.1	mitochondrial substrate carrier family protein	3.959093622	0.880580904	0.873260317	0.800237522	Uniprot/SPTREMBL:B4FIM7; Putative uncharacterized protein | GO:0055085; transmembrane transport | GO:0016020; membrane | GO:0006810; transport | GO:0005743; mitochondrial inner membrane | GO:0005488; binding | GO:0005215; transporter activity
GRMZM2G128016_T01	transport.metabolite transporters at the mitochondrial membrane	mitochondrial aspartate-glutamate transporter AGC1, putative, expressed	AT5G15640.1	mitochondrial substrate carrier family protein	11.21136499	8.31485359	4.630217663	2.840615861	GO:0050662; coenzyme binding | GO:0055085; transmembrane transport | GO:0055114; oxidation reduction | RefSeq_dna:NM_001157465; LOC100284570 (cl31562_-1b) nuclear gene encoding mitochondrial protein mRNA | RefSeq_peptide:NP_001150937; LOC100284570 | UniGene:Zm.50288; Transcribed locus | Uniprot/SPTREMBL:B4FUV3; Putative uncharacterized protein | Uniprot/SPTREMBL:B6TV90; Mitochondrial aspartate-gl…
GRMZM2G128016_T02	transport.metabolite transporters at the mitochondrial membrane	mitochondrial aspartate-glutamate transporter AGC1, putative, expressed	AT5G15640.1	mitochondrial substrate carrier family protein	11.21136499	8.31485359	4.630217663	2.840615861	UniGene:Zm.84922; LOC100284570 | GO:0055114; oxidation reduction | GO:0055085; transmembrane transport | GO:0050662; coenzyme binding | GO:0016020; membrane | GO:0015936; coenzyme A metabolic process | GO:0006810; transport | GO:0005743; mitochondrial inner membrane | GO:0005488; binding | GO:0004420; hydroxymethylglutaryl-CoA reductase (NADPH) activity
GRMZM2G169363_T01	transport.metabolite transporters at the mitochondrial membrane	mitochondrial carrier-like protein, putative, expressed	AT1G72820.1	mitochondrial substrate carrier family protein	4.907912921	2.28901585	1.097099961	0.239231053	UniGene:Zm.126525; Clone 297919 mRNA sequence | GO:0055085; transmembrane transport | GO:0016020; membrane | GO:0006810; transport | GO:0006412; translation | GO:0005840; ribosome | GO:0005743; mitochondrial inner membrane | GO:0005737; cytoplasm | GO:0005622; intracellular | GO:0005525; GTP binding | GO:0005488; binding | GO:0005215; transporter activity | GO:0003735; structural constituent of r…
GRMZM2G180971_T01	transport.metabolite transporters at the mitochondrial membrane	calcium-binding mitochondrial carrier F55A11.4, putative, expressed	AT5G07320.1	mitochondrial substrate carrier family protein	6.892907502	0.955366558	0.72094361	0.67270091	GO:0055085; transmembrane transport | RefSeq_dna:NM_001157708; LOC100284813 (pco141217) nuclear gene encoding mitochondrial protein mRNA | RefSeq_peptide:NP_001151180; LOC100284813 | UniGene:Zm.148530; TSA: Zea mays contig21252 mRNA sequence | UniGene:Zm.85253; LOC100284813 | Uniprot/SPTREMBL:B6TXR3; Calcium-binding mitochondrial carrier F55A11.4Putative uncharacterized protein ; | GO:0016020; me…
GRMZM2G180971_T03	transport.metabolite transporters at the mitochondrial membrane	calcium-binding mitochondrial carrier F55A11.4, putative, expressed	AT5G07320.1	mitochondrial substrate carrier family protein	6.892907502	0.955366558	0.72094361	0.67270091	UniGene:Zm.148530; TSA: Zea mays contig21252 mRNA sequence | GO:0055085; transmembrane transport | GO:0016020; membrane | GO:0006839; mitochondrial transport | GO:0006810; transport | GO:0005743; mitochondrial inner membrane | GO:0005739; mitochondrion | GO:0005509; calcium ion binding | GO:0005488; binding
GRMZM2G001803_T01	transport.metal	zinc transporter SLC39A7, putative, expressed	AT1G68100.1	IAR1 (IAA-ALANINE RESISTANT 1); metal ion transmembrane transporter	19.92388192	6.608420327	3.419681234	3.246987973	Uniprot/SPTREMBL:B4FBL3; Putative uncharacterized proteinZinc transporter SLC39A7 ; | UniGene:Zm.82730; Hypothetical protein LOC100192506 | RefSeq_peptide:NP_001131198; hypothetical protein LOC100192506 | RefSeq_dna:NM_001137726; hypothetical protein LOC100192506 (LOC100192506) mRNA | GO:0055085; transmembrane transport | GO:0046873; metal ion transmembrane transporter activity | GO:0030001; meta…
GRMZM2G001803_T02	transport.metal	zinc transporter SLC39A7, putative, expressed	AT1G68100.1	IAR1 (IAA-ALANINE RESISTANT 1); metal ion transmembrane transporter	19.92388192	6.608420327	3.419681234	3.246987973	Uniprot/SPTREMBL:B4FBL3; Putative uncharacterized proteinZinc transporter SLC39A7 ; | RefSeq_peptide:NP_001131198; hypothetical protein LOC100192506 | GO:0055085; transmembrane transport | GO:0046873; metal ion transmembrane transporter activity | GO:0030001; metal ion transport | GO:0016020; membrane | EntrezGene:100192506; hypothetical protein LOC100192506
GRMZM2G141636_T01	transport.metal	nickel ion transporter, putative, expressed	AT2G16800.1	high-affinity nickel-transport family protein	44.99877686	35.55533772	12.73655372	12.02810999	UniGene:Zm.23542; Hypothetical protein LOC100193940 | Uniprot/SPTREMBL:B4FGU1; Putative uncharacterized protein | Uniprot/SPTREMBL:B4FQK9; Putative uncharacterized protein | Uniprot/SPTREMBL:B6SQM7; Nickel ion transporter | Uniprot/SPTREMBL:C0PJA9; Putative uncharacterized protein | RefSeq_peptide:NP_001132481; hypothetical protein LOC100193940 | RefSeq_dna:NM_001139009; hypothetical protein LOC1…
GRMZM2G477741_T01	transport.metal	metal tolerance protein A2, putative, expressed	AT2G46800.2	ZAT (ZINC TRANSPORTER OF ARABIDOPSIS THALIANA); inorganic anion transmembrane transporter/ metal ion transmembrane transporter/ zinc ion transmembrane transporter	50.5217499	43.05546832	26.63513849	15.56567552	Uniprot/SPTREMBL:B6TAC6; Metal tolerance protein A2Putative uncharacterized protein ; | RefSeq_peptide:NP_001149065; metal tolerance protein A2 | GO:0055085; transmembrane transport | GO:0016020; membrane | GO:0008324; cation transmembrane transporter activity | GO:0006812; cation transport | EntrezGene:100282686; metal tolerance protein A2
GRMZM2G477741_T02	transport.metal	metal tolerance protein A2, putative, expressed	AT2G46800.2	ZAT (ZINC TRANSPORTER OF ARABIDOPSIS THALIANA); inorganic anion transmembrane transporter/ metal ion transmembrane transporter/ zinc ion transmembrane transporter	50.5217499	43.05546832	26.63513849	15.56567552	Uniprot/SPTREMBL:B6TAC6; Metal tolerance protein A2Putative uncharacterized protein ; | RefSeq_peptide:NP_001149065; metal tolerance protein A2 | GO:0055085; transmembrane transport | GO:0016020; membrane | GO:0008324; cation transmembrane transporter activity | GO:0006812; cation transport | EntrezGene:100282686; metal tolerance protein A2
GRMZM2G477741_T03	transport.metal	metal tolerance protein A2, putative, expressed	AT2G46800.2	ZAT (ZINC TRANSPORTER OF ARABIDOPSIS THALIANA); inorganic anion transmembrane transporter/ metal ion transmembrane transporter/ zinc ion transmembrane transporter	50.5217499	43.05546832	26.63513849	15.56567552	Uniprot/SPTREMBL:B6TAC6; Metal tolerance protein A2Putative uncharacterized protein ; | UniGene:Zm.73536; Metal tolerance protein A2 | RefSeq_peptide:NP_001149065; metal tolerance protein A2 | RefSeq_dna:NM_001155593; metal tolerance protein A2 (LOC100282686) mRNA | GO:0055085; transmembrane transport | GO:0016020; membrane | GO:0008324; cation transmembrane transporter activity | GO:0006812; cat…
GRMZM2G019974_T01	transport.misc	carbohydrate transporter/ sugar porter, putative	AT1G79360.1	ATOCT2 (ARABIDOPSIS THALIANA ORGANIC CATION/CARNITINE TRANSPORTER 2); carbohydrate transmembrane transporter/ sugar:hydrogen symporter	4.674882705	1.669712723	0	0.052609533	Uniprot/SPTREMBL:B6SX05; Carbohydrate transporter/ sugar porter | Uniprot/SPTREMBL:B6SVW2; Carbohydrate transporter/ sugar porter | Uniprot/SPTREMBL:B4FWK6; Putative uncharacterized protein | UniGene:Zm.84734; Carbohydrate transporter/ sugar porter | RefSeq_peptide:NP_001147880; carbohydrate transporter/ sugar porter | RefSeq_dna:NM_001154408; carbohydrate transporter/ sugar porter (LOC100281490)…
GRMZM2G030125_T01	transport.misc	auxin Efflux Carrier family protein, expressed	AT1G71090.1	auxin efflux carrier family protein	51.72941965	19.07012067	11.74963043	7.798855828	Uniprot/SPTREMBL:B6T254; Auxin Efflux Carrier family proteinPutative uncharacterized protein ; | RefSeq_peptide:NP_001148375; LOC100281987 | GO:0055085; transmembrane transport | GO:0017153; sodium:dicarboxylate symporter activity | GO:0016021; integral to membrane | GO:0016020; membrane | GO:0006835; dicarboxylic acid transport | EntrezGene:100281987; LOC100281987
GRMZM2G030125_T02	transport.misc	auxin Efflux Carrier family protein, expressed	AT1G71090.1	auxin efflux carrier family protein	51.72941965	19.07012067	11.74963043	7.798855828	Uniprot/SPTREMBL:B6T254; Auxin Efflux Carrier family proteinPutative uncharacterized protein ; | UniGene:Zm.6178; LOC100281987 | RefSeq_peptide:NP_001148375; LOC100281987 | RefSeq_dna:NM_001154903; LOC100281987 (umc1142) mRNA | GO:0055085; transmembrane transport | GO:0017153; sodium:dicarboxylate symporter activity | GO:0016021; integral to membrane | GO:0016020; membrane | GO:0006835; dicarboxy…
GRMZM2G045781_T01	transport.misc	permease I, putative, expressed	AT5G62890.3	permease, putative	14.00275178	0.115573598	0.015765742	0.008527977	GO:0055085; transmembrane transport | GO:0016020; membrane | GO:0006810; transport | GO:0005215; transporter activity
GRMZM2G045781_T02	transport.misc	permease I, putative, expressed	AT5G62890.3	permease, putative	14.00275178	0.115573598	0.015765742	0.008527977	UniGene:Zm.100042; Transcribed locus strongly similar to NP_001150400.1 permease I [Zea mays] | UniGene:Zm.101260; Transcribed locus strongly similar to NP_001150400.1 permease I [Zea mays] | UniGene:Zm.106311; Permease I | UniGene:Zm.118848; Transcribed locus moderately similar to NP_001150400.1 permease I [Zea mays] | Uniprot/SPTREMBL:B4FIZ3; Putative uncharacterized protein | Uniprot/SPTREMBL:…
GRMZM2G081774_T02	transport.misc	major Facilitator Superfamily protein, expressed	AT3G13050.1	transporter-related	3.297216594	3.074063876	1.02333421	0.868638614	UniGene:Zm.21552; TSA: Zea mays contig02839 mRNA sequence | UniGene:Zm.149285; TSA: Zea mays contig17742 mRNA sequence | GO:0055085; transmembrane transport | GO:0022891; substrate-specific transmembrane transporter activity | GO:0016021; integral to membrane | GO:0016020; membrane | GO:0006810; transport | GO:0005215; transporter activity
GRMZM2G081774_T01	transport.misc	major Facilitator Superfamily protein, expressed	AT3G13050.1	transporter-related	3.297216594	3.074063876	1.02333421	0.868638614	UniGene:Zm.21552; TSA: Zea mays contig02839 mRNA sequence | UniGene:Zm.149285; TSA: Zea mays contig17742 mRNA sequence | UniGene:Zm.138673; Clone 1625118 mRNA sequence | GO:0055085; transmembrane transport | GO:0022891; substrate-specific transmembrane transporter activity | GO:0016021; integral to membrane | GO:0016020; membrane | GO:0006810; transport | GO:0005215; transporter activity
GRMZM2G081774_T03	transport.misc	major Facilitator Superfamily protein, expressed	AT3G13050.1	transporter-related	3.297216594	3.074063876	1.02333421	0.868638614	UniGene:Zm.21552; TSA: Zea mays contig02839 mRNA sequence | UniGene:Zm.149285; TSA: Zea mays contig17742 mRNA sequence | GO:0055085; transmembrane transport | GO:0022891; substrate-specific transmembrane transporter activity | GO:0016021; integral to membrane | GO:0016020; membrane | GO:0006810; transport | GO:0005215; transporter activity
GRMZM2G081774_T04	transport.misc	major Facilitator Superfamily protein, expressed	AT3G13050.1	transporter-related	3.297216594	3.074063876	1.02333421	0.868638614	GO:0055085; transmembrane transport | GO:0022891; substrate-specific transmembrane transporter activity | GO:0016021; integral to membrane | GO:0016020; membrane | GO:0006810; transport | GO:0005215; transporter activity
GRMZM2G081774_T05	transport.misc	major Facilitator Superfamily protein, expressed	AT3G13050.1	transporter-related	3.297216594	3.074063876	1.02333421	0.868638614	GO:0055085; transmembrane transport | GO:0022891; substrate-specific transmembrane transporter activity | GO:0016021; integral to membrane | GO:0016020; membrane | GO:0006810; transport | GO:0005215; transporter activity
GRMZM2G100484_T01	transport.misc	permease, putative, expressed	AT2G34190.1	xanthine/uracil permease family protein	11.11337086	2.396895673	1.880419895	1.46200182	Uniprot/SPTREMBL:C0PE84; Putative uncharacterized protein | Uniprot/SPTREMBL:B7ZWX4; Putative uncharacterized protein | Uniprot/SPTREMBL:B6U234; Permease | RefSeq_peptide:NP_001145705; hypothetical protein LOC100279209 | RefSeq_dna:NM_001152233; LOC100279209 (AY109981) mRNA | GO:0055085; transmembrane transport | GO:0016020; membrane | GO:0006810; transport | GO:0005215; transporter activity | En…
GRMZM2G100484_T02	transport.misc	permease, putative, expressed	AT2G34190.1	xanthine/uracil permease family protein	11.11337086	2.396895673	1.880419895	1.46200182	Uniprot/SPTREMBL:B7ZWX4; Putative uncharacterized protein | RefSeq_peptide:NP_001145705; hypothetical protein LOC100279209 | GO:0055085; transmembrane transport | GO:0016020; membrane | GO:0006810; transport | GO:0005215; transporter activity | EntrezGene:100279209; LOC100279209
GRMZM2G100484_T03	transport.misc	permease, putative, expressed	AT2G34190.1	xanthine/uracil permease family protein	11.11337086	2.396895673	1.880419895	1.46200182	Uniprot/SPTREMBL:C0PE84; Putative uncharacterized protein | Uniprot/SPTREMBL:B7ZWX4; Putative uncharacterized protein | Uniprot/SPTREMBL:B6U234; Permease | UniGene:Zm.19012; LOC100279209 | RefSeq_peptide:NP_001145705; hypothetical protein LOC100279209 | GO:0055085; transmembrane transport | GO:0016020; membrane | GO:0006810; transport | GO:0005215; transporter activity | EntrezGene:100279209; LOC…
GRMZM2G115635_T01	transport.misc	permease, putative, expressed	AT5G62890.3	permease, putative	27.56248801	3.374211801	0.686206739	0.489959891	Uniprot/SPTREMBL:B4FW56; PermeasePutative uncharacterized protein ; | UniGene:Zm.4991; LOC100273531 | RefSeq_peptide:NP_001141421; hypothetical protein LOC100273531 | RefSeq_dna:NM_001147949; LOC100273531 (TIDP3490) mRNA | GO:0055085; transmembrane transport | GO:0016020; membrane | GO:0006810; transport | GO:0005215; transporter activity | EntrezGene:100273531; LOC100273531
GRMZM2G125424_T03	transport.misc	NA	0	NA	24.23836273	4.39321498	0.831829297	0.469156885	UniGene:Zm.59342; Transcribed locus | GO:0055085; transmembrane transport | GO:0042626; ATPase activity coupled to transmembrane movement of substances | GO:0017111; nucleoside-triphosphatase activity | GO:0016887; ATPase activity | GO:0016021; integral to membrane | GO:0006810; transport | GO:0005524; ATP binding | GO:0000166; nucleotide binding
GRMZM2G125424_T04	transport.misc	NA	0	NA	24.23836273	4.39321498	0.831829297	0.469156885	GO:0055085; transmembrane transport | RefSeq_dna:NM_001176189; hypothetical protein LOC100383541 (LOC100383541) mRNA | RefSeq_peptide:NP_001169660; hypothetical protein LOC100383541 | UniGene:Zm.24228; Hypothetical protein LOC100383541 | UniGene:Zm.59342; Transcribed locus | Uniprot/SPTREMBL:C0PGU4; Putative uncharacterized protein | GO:0042626; ATPase activity coupled to transmembrane movement o…
GRMZM2G169539_T03	transport.misc	transparent testa 12 protein, putative, expressed	AT3G21690.1	MATE efflux family protein	24.58171984	14.37076616	1.296322675	0.235043074	GO:0055085; transmembrane transport | GO:0016020; membrane | GO:0015297; antiporter activity | GO:0015238; drug transmembrane transporter activity | GO:0006855; drug transmembrane transport
GRMZM2G169539_T01	transport.misc	transparent testa 12 protein, putative, expressed	AT3G21690.1	MATE efflux family protein	24.58171984	14.37076616	1.296322675	0.235043074	Uniprot/SPTREMBL:B4FPW3; Putative uncharacterized protein | UniGene:Zm.67851; Hypothetical protein LOC100272673 | RefSeq_peptide:NP_001140602; hypothetical protein LOC100272673 | RefSeq_dna:NM_001147130; hypothetical protein LOC100272673 (LOC100272673) mRNA | GO:0055085; transmembrane transport | GO:0016020; membrane | GO:0015297; antiporter activity | GO:0015238; drug transmembrane transporter a…
GRMZM2G169539_T02	transport.misc	transparent testa 12 protein, putative, expressed	AT3G21690.1	MATE efflux family protein	24.58171984	14.37076616	1.296322675	0.235043074	Uniprot/SPTREMBL:B4FPW3; Putative uncharacterized protein | UniGene:Zm.120109; Transcribed locus moderately similar to NP_001140602.1 hypothetical protein LOC100272673 [Zea mays] | RefSeq_peptide:NP_001140602; hypothetical protein LOC100272673 | GO:0055085; transmembrane transport | GO:0016020; membrane | GO:0015297; antiporter activity | GO:0015238; drug transmembrane transporter activity | GO:0…
GRMZM2G169539_T04	transport.misc	transparent testa 12 protein, putative, expressed	AT3G21690.1	MATE efflux family protein	24.58171984	14.37076616	1.296322675	0.235043074	GO:0055085; transmembrane transport | GO:0016020; membrane | GO:0015297; antiporter activity | GO:0015238; drug transmembrane transporter activity | GO:0006855; drug transmembrane transport
GRMZM2G171880_T01	transport.misc	permease, putative, expressed	AT4G38050.1	transmembrane transporter	11.06984384	4.712810393	0.188639219	0.080185923	GO:0055085; transmembrane transport | RefSeq_dna:NM_001152867; hypothetical protein LOC100279915 (LOC100279915) mRNA | RefSeq_dna:NM_001176099; hypothetical protein LOC100383449 (LOC100383449) mRNA | RefSeq_peptide:NP_001146339; hypothetical protein LOC100279915 | RefSeq_peptide:NP_001169570; hypothetical protein LOC100383449 | UniGene:Zm.21835; Hypothetical protein LOC100279915 | Uniprot/SPTREMB…
GRMZM2G171880_T02	transport.misc	permease, putative, expressed	AT4G38050.1	transmembrane transporter	11.06984384	4.712810393	0.188639219	0.080185923	UniGene:Zm.103270; Transcribed locus strongly similar to NP_001146339.1 hypothetical protein LOC100279915 [Zea mays] | GO:0055085; transmembrane transport | GO:0016020; membrane | GO:0006810; transport | GO:0005215; transporter activity
GRMZM2G381453_T01	transport.misc	transporter-like protein, putative, expressed	AT3G13050.1	transporter-related	9.505030234	4.555146937	2.019489146	0.740917589	Uniprot/SPTREMBL:C0PIJ5; Putative uncharacterized protein | Uniprot/SPTREMBL:B4FGP2; Putative uncharacterized protein | RefSeq_peptide:NP_001132445; hypothetical protein LOC100193898 | GO:0055085; transmembrane transport | GO:0016021; integral to membrane | GO:0016020; membrane | GO:0006810; transport | GO:0005215; transporter activity | EntrezGene:100193898; hypothetical protein LOC100193898
GRMZM2G381453_T02	transport.misc	transporter-like protein, putative, expressed	AT3G13050.1	transporter-related	9.505030234	4.555146937	2.019489146	0.740917589	Uniprot/SPTREMBL:C0PIJ5; Putative uncharacterized protein | Uniprot/SPTREMBL:B4FGP2; Putative uncharacterized protein | UniGene:Zm.34518; Hypothetical protein LOC100193898 | RefSeq_peptide:NP_001132445; hypothetical protein LOC100193898 | RefSeq_dna:NM_001138973; hypothetical protein LOC100193898 (LOC100193898) mRNA | GO:0055085; transmembrane transport | GO:0016021; integral to membrane | GO:001…
GRMZM2G381453_T03	transport.misc	transporter-like protein, putative, expressed	AT3G13050.1	transporter-related	9.505030234	4.555146937	2.019489146	0.740917589	Uniprot/SPTREMBL:C0PP16; Putative uncharacterized protein | Uniprot/SPTREMBL:B4FGP2; Putative uncharacterized protein | RefSeq_peptide:NP_001132445; hypothetical protein LOC100193898 | GO:0055085; transmembrane transport | GO:0016021; integral to membrane | GO:0016020; membrane | GO:0006810; transport | GO:0005215; transporter activity | EntrezGene:100193898; hypothetical protein LOC100193898
GRMZM2G381453_T06	transport.misc	transporter-like protein, putative, expressed	AT3G13050.1	transporter-related	9.505030234	4.555146937	2.019489146	0.740917589	Uniprot/SPTREMBL:B4FGP2; Putative uncharacterized protein | RefSeq_peptide:NP_001132445; hypothetical protein LOC100193898 | GO:0055085; transmembrane transport | GO:0016021; integral to membrane | GO:0016020; membrane | GO:0006810; transport | GO:0005215; transporter activity | EntrezGene:100193898; hypothetical protein LOC100193898
GRMZM2G420823_T01	transport.misc	permease I, putative, expressed	AT5G62890.4	permease, putative	2.610148951	0.030995976	0	0.005946563	Uniprot/SPTREMBL:B4FDS4; Putative uncharacterized protein | UniGene:Zm.99864; Transcribed locus strongly similar to NP_001149779.1 permease I [Zea mays] | GO:0055085; transmembrane transport | GO:0016020; membrane | GO:0006810; transport | GO:0005215; transporter activity
GRMZM2G420823_T02	transport.misc	permease I, putative, expressed	AT5G62890.4	permease, putative	2.610148951	0.030995976	0	0.005946563	Uniprot/SPTREMBL:C0P7N0; Putative uncharacterized protein | Uniprot/SPTREMBL:B4FMN7; Putative uncharacterized protein | UniGene:Zm.99864; Transcribed locus strongly similar to NP_001149779.1 permease I [Zea mays] | GO:0055085; transmembrane transport | GO:0016020; membrane | GO:0006810; transport | GO:0005215; transporter activity
GRMZM2G420823_T03	transport.misc	permease I, putative, expressed	AT5G62890.4	permease, putative	2.610148951	0.030995976	0	0.005946563	GO:0055085; transmembrane transport | GO:0016020; membrane | GO:0006810; transport | GO:0005215; transporter activity
GRMZM2G420823_T04	transport.misc	permease I, putative, expressed	AT5G62890.4	permease, putative	2.610148951	0.030995976	0	0.005946563	GO:0005215; transporter activity | GO:0006810; transport | GO:0016020; membrane | GO:0055085; transmembrane transport
GRMZM2G045686_T02	transport.NDP-sugars at the ER	solute carrier family 35 member B1, putative, expressed	AT1G14360.1	UTR3 (UDP-GALACTOSE TRANSPORTER 3); pyrimidine nucleotide sugar transmembrane transporter	2.985043276	0.650462337	1.106948834	0.326601167	GO:0055085; transmembrane transport | Uniprot/SPTREMBL:C0HG76; Putative uncharacterized protein
GRMZM2G045686_T01	transport.NDP-sugars at the ER	solute carrier family 35 member B1, putative, expressed	AT1G14360.1	UTR3 (UDP-GALACTOSE TRANSPORTER 3); pyrimidine nucleotide sugar transmembrane transporter	2.985043276	0.650462337	1.106948834	0.326601167	GO:0055085; transmembrane transport | Uniprot/SPTREMBL:C0HG76; Putative uncharacterized protein
GRMZM2G176029_T02	transport.NDP-sugars at the ER	solute carrier family 35 member B1, putative, expressed	AT1G14360.1	UTR3 (UDP-GALACTOSE TRANSPORTER 3); pyrimidine nucleotide sugar transmembrane transporter	63.0672829	27.39758757	33.76680825	16.10852956	GO:0055085; transmembrane transport
GRMZM2G176029_T01	transport.NDP-sugars at the ER	solute carrier family 35 member B1, putative, expressed	AT1G14360.1	UTR3 (UDP-GALACTOSE TRANSPORTER 3); pyrimidine nucleotide sugar transmembrane transporter	63.0672829	27.39758757	33.76680825	16.10852956	Uniprot/SPTREMBL:B6TKZ4; Solute carrier family 35 member B1 | Uniprot/SPTREMBL:B4FKQ7; Putative uncharacterized protein | UniGene:Zm.118302; Hypothetical protein LOC100216965 | RefSeq_peptide:NP_001136818; hypothetical protein LOC100216965 | RefSeq_dna:NM_001143346; hypothetical protein LOC100216965 (LOC100216965) mRNA | GO:0055085; transmembrane transport | EntrezGene:100216965; hypothetical pro…
GRMZM2G131431_T01	transport.p- and v-ATPases	expressed protein	AT5G55290.1	ATP synthase subunit H family protein	132.7147068	48.79366802	29.58934916	28.47589778	Uniprot/SPTREMBL:B6T2R2; Putative uncharacterized protein | Uniprot/SPTREMBL:B6SQV1; Putative uncharacterized protein | Uniprot/SPTREMBL:B6SGK0; Putative uncharacterized protein | UniGene:Zm.136567; Hypothetical protein LOC100276001 | GO:0033179; proton-transporting V-type ATPase V0 domain | GO:0015991; ATP hydrolysis coupled proton transport | GO:0015078; hydrogen ion transmembrane transporter a…
GRMZM2G052088_T01	transport.p- and v-ATPases.H+-transporting two-sector ATPase	vacuolar ATP synthase subunit d, putative, expressed	AT3G28715.1	H+-transporting two-sector ATPase, putative	154.3922463	91.5453968	77.86057477	64.93519959	Uniprot/SPTREMBL:C4J6R6; Putative uncharacterized protein | UniGene:Zm.5094; Hypothetical protein LOC100280083 | GO:0033179; proton-transporting V-type ATPase V0 domain | GO:0033177; proton-transporting two-sector ATPase complex proton-transporting domain | GO:0015986; ATP synthesis coupled proton transport | GO:0015078; hydrogen ion transmembrane transporter activity
GRMZM2G052088_T02	transport.p- and v-ATPases.H+-transporting two-sector ATPase	vacuolar ATP synthase subunit d, putative, expressed	AT3G28715.1	H+-transporting two-sector ATPase, putative	154.3922463	91.5453968	77.86057477	64.93519959	Uniprot/SPTREMBL:B8A1U5; Putative uncharacterized protein | RefSeq_peptide:NP_001146493; hypothetical protein LOC100280083 | RefSeq_dna:NM_001153021; hypothetical protein LOC100280083 (LOC100280083) mRNA | GO:0033177; proton-transporting two-sector ATPase complex proton-transporting domain | GO:0015986; ATP synthesis coupled proton transport | GO:0015078; hydrogen ion transmembrane transporter ac…
GRMZM2G052088_T03	transport.p- and v-ATPases.H+-transporting two-sector ATPase	vacuolar ATP synthase subunit d, putative, expressed	AT3G28715.1	H+-transporting two-sector ATPase, putative	154.3922463	91.5453968	77.86057477	64.93519959	GO:0015078; hydrogen ion transmembrane transporter activity | GO:0015986; ATP synthesis coupled proton transport | GO:0033177; proton-transporting two-sector ATPase complex proton-transporting domain
GRMZM2G143128_T01	transport.p- and v-ATPases.H+-transporting two-sector ATPase	vacuolar ATP synthase 21 kDa proteolipid subunit, putative, expressed	AT4G32530.1	vacuolar ATP synthase, putative / V-ATPase, putative	139.9219528	68.44412314	54.10709565	53.02438159	Uniprot/SPTREMBL:B4FZS8; Putative uncharacterized proteinVacuolar ATP synthase 21 kDa proteolipid subunit ; | UniGene:Zm.94308; Vacuolar ATP synthase 21 kDa proteolipid subunit | RefSeq_peptide:NP_001152133; LOC100285771 | RefSeq_peptide:NP_001149665; vacuolar ATP synthase 21 kDa proteolipid subunit | RefSeq_dna:NM_001156193; vacuolar ATP synthase 21 kDa proteolipid subunit (LOC100283291) mRNA | …
GRMZM2G112039_T02	transport.peptides and oligopeptides	peptide transporter PTR2, putative, expressed	AT1G33440.1	proton-dependent oligopeptide transport (POT) family protein	4.54112199	1.825596753	1.425184776	1.184914806	UniGene:Zm.84888; Transcribed locus moderately similar to XP_002447891.1 hypothetical protein SORBIDRAFT_06g017470 [Sorghum bicolor] | UniGene:Zm.41153; TSA: Zea mays contig13537 mRNA sequence | UniGene:Zm.144044; TSA: Zea mays contig58178 mRNA sequence | GO:0046873; metal ion transmembrane transporter activity | GO:0030001; metal ion transport | GO:0016020; membrane | GO:0006754; ATP biosyntheti…
GRMZM2G378604_T02	transport.peptides and oligopeptides	peptide transporter PTR2-B, putative, expressed	AT1G22540.1	proton-dependent oligopeptide transport (POT) family protein	16.98465296	3.456138514	0.817051565	0.210355051	GO:0055085; transmembrane transport | GO:0016020; membrane | GO:0006857; oligopeptide transport | GO:0005215; transporter activity
GRMZM2G378604_T01	transport.peptides and oligopeptides	peptide transporter PTR2-B, putative, expressed	AT1G22540.1	proton-dependent oligopeptide transport (POT) family protein	16.98465296	3.456138514	0.817051565	0.210355051	Uniprot/SPTREMBL:B7ZYK0; Putative uncharacterized protein | Uniprot/SPTREMBL:B6SWT0; Peptide transporter PTR2-B | UniGene:Zm.80422; Transcribed locus strongly similar to NP_001147980.1 LOC100281589 [Zea mays] | UniGene:Zm.139342; LOC100281589 | RefSeq_peptide:NP_001147980; LOC100281589 | RefSeq_dna:NM_001154508; LOC100281589 (pco137042) mRNA | GO:0055085; transmembrane transport | GO:0016020; mem…
GRMZM2G017047_T01	transport.phosphate	inorganic phosphate cotransporter, putative, expressed	AT5G44370.1	PHT4;6 (PHOSPHATE TRANSPORTER 4;6); carbohydrate transmembrane transporter/ inorganic phosphate transmembrane transporter/ organic anion transmembrane transporter/ sugar:hydrogen symporter	16.820735	11.38044745	6.883230268	4.57008886	Uniprot/SPTREMBL:C0HIJ3; Putative uncharacterized protein | UniGene:Zm.12250; Hypothetical protein LOC100381743 | RefSeq_peptide:NP_001168019; hypothetical protein LOC100381743 | RefSeq_dna:NM_001174548; hypothetical protein LOC100381743 (LOC100381743) mRNA | GO:0055085; transmembrane transport | EntrezGene:100381743; hypothetical protein LOC100381743
GRMZM2G017047_T02	transport.phosphate	inorganic phosphate cotransporter, putative, expressed	AT5G44370.1	PHT4;6 (PHOSPHATE TRANSPORTER 4;6); carbohydrate transmembrane transporter/ inorganic phosphate transmembrane transporter/ organic anion transmembrane transporter/ sugar:hydrogen symporter	16.820735	11.38044745	6.883230268	4.57008886	EntrezGene:100381743; hypothetical protein LOC100381743 | GO:0055085; transmembrane transport | RefSeq_peptide:NP_001168019; hypothetical protein LOC100381743 | Uniprot/SPTREMBL:C0HIJ3; Putative uncharacterized protein
GRMZM2G142919_T01	transport.phosphate	sialin, putative, expressed	AT2G38060.1	PHT4;2 (PHOSPHATE TRANSPORTER 4;2); carbohydrate transmembrane transporter/ inorganic phosphate transmembrane transporter/ organic anion transmembrane transporter/ sugar:hydrogen symporter	11.06761403	3.752877137	1.668075216	1.407008957	Uniprot/SPTREMBL:B4G0R5; Putative uncharacterized proteinSialin ; | UniGene:Zm.98716; Transcribed locus strongly similar to NP_001148061.1 sialin [Zea mays] | UniGene:Zm.119199; Sialin | RefSeq_peptide:NP_001148061; sialin | RefSeq_dna:NM_001154589; sialin (LOC100281669) mRNA | GO:0055085; transmembrane transport | GO:0016020; membrane | GO:0006955; immune response | GO:0005164; tumor necrosis fa…
GRMZM2G146670_T01	transport.porins	isochorismate synthase 1, chloroplast precursor, putative, expressed	AT3G01280.1	VDAC1 (VOLTAGE DEPENDENT ANION CHANNEL 1); voltage-gated anion channel	118.7106193	62.59635728	38.36889732	34.47919942	Uniprot/SPTREMBL:Q9SPD8; Voltage-dependent anion channel protein 1b | Uniprot/SPTREMBL:O82577; Voltage-dependent anion-selective channel protein Fragment | UniGene:Zm.468; Voltage-dependent anion channel protein 1b | RefSeq_peptide:NP_001104948; voltage-dependent anion channel protein 1b | RefSeq_dna:NM_001111478; voltage-dependent anion channel protein 1b (vdac1b) mRNA | GO:0055085; transmembran…
GRMZM2G155021_T01	transport.porins	outer plastidial membrane protein porin, putative, expressed	AT3G01280.1	VDAC1 (VOLTAGE DEPENDENT ANION CHANNEL 1); voltage-gated anion channel	27.11816769	13.9767106	7.252976991	6.163632027	RefSeq_peptide:NP_001105453; outer plastidial membrane protein porin | Uniprot/SPTREMBL:B4FH98; Putative uncharacterized protein | Uniprot/SPTREMBL:B6U9C1; Outer plastidial membrane protein porin | Uniprot/SWISSPROT:P42057; Outer plastidial membrane protein porin (Voltage-dependent anion-selective channel protein)(VDAC) | RefSeq_dna:NM_001111983; porin (por1) mRNA | MaizeGDB_GenBank:AY106124; | G…
GRMZM2G009353_T01	transport.potassium	potassium transporter 11, putative, expressed	AT1G31120.1	KUP10; potassium ion transmembrane transporter	11.91258011	7.833235508	1.533039757	1.421569978	GO:0016020; membrane | GO:0015079; potassium ion transmembrane transporter activity | GO:0006813; potassium ion transport
GRMZM2G009353_T02	transport.potassium	potassium transporter 11, putative, expressed	AT1G31120.1	KUP10; potassium ion transmembrane transporter	11.91258011	7.833235508	1.533039757	1.421569978	UniGene:Zm.64434; Transcribed locus strongly similar to XP_002444020.1 hypothetical protein SORBIDRAFT_07g006005 [Sorghum bicolor] | GO:0016020; membrane | GO:0015079; potassium ion transmembrane transporter activity | GO:0006813; potassium ion transport
GRMZM2G121063_T01	transport.potassium	potassium transporter 15, putative, expressed	AT5G09400.1	KUP7; potassium ion transmembrane transporter	7.113329519	3.755332759	3.317462863	3.06195	Uniprot/SPTREMBL:B4FIR3; Putative uncharacterized protein | UniGene:Zm.1780; Hypothetical protein LOC100274241 | RefSeq_peptide:NP_001142081; hypothetical protein LOC100274241 | RefSeq_dna:NM_001148609; hypothetical protein LOC100274241 (LOC100274241) mRNA | GO:0016020; membrane | GO:0015079; potassium ion transmembrane transporter activity | GO:0006813; potassium ion transport | EntrezGene:10027…
GRMZM2G121063_T02	transport.potassium	potassium transporter 15, putative, expressed	AT5G09400.1	KUP7; potassium ion transmembrane transporter	7.113329519	3.755332759	3.317462863	3.06195	Uniprot/SPTREMBL:B4FIR3; Putative uncharacterized protein | RefSeq_peptide:NP_001142081; hypothetical protein LOC100274241 | GO:0016020; membrane | GO:0015079; potassium ion transmembrane transporter activity | GO:0008076; voltage-gated potassium channel complex | GO:0006813; potassium ion transport | GO:0005249; voltage-gated potassium channel activity | EntrezGene:100274241; hypothetical protei…
GRMZM2G121063_T03	transport.potassium	potassium transporter 15, putative, expressed	AT5G09400.1	KUP7; potassium ion transmembrane transporter	7.113329519	3.755332759	3.317462863	3.06195	Uniprot/SPTREMBL:B4FIR3; Putative uncharacterized protein | UniGene:Zm.107296; Transcribed locus | RefSeq_peptide:NP_001142081; hypothetical protein LOC100274241 | GO:0016020; membrane | GO:0015079; potassium ion transmembrane transporter activity | GO:0006813; potassium ion transport | EntrezGene:100274241; hypothetical protein LOC100274241
GRMZM2G125387_T01	transport.potassium	potassium transporter 8, putative, expressed	AT2G40540.2	KT2 (POTASSIUM TRANSPORTER 2); potassium ion transmembrane transporter	4.851194409	0.91509112	0.214134494	0.124652383	UniGene:Zm.119075; Clone 348489 mRNA sequence | GO:0016020; membrane | GO:0015079; potassium ion transmembrane transporter activity | GO:0006813; potassium ion transport
GRMZM2G125387_T02	transport.potassium	potassium transporter 8, putative, expressed	AT2G40540.2	KT2 (POTASSIUM TRANSPORTER 2); potassium ion transmembrane transporter	4.851194409	0.91509112	0.214134494	0.124652383	GO:0006813; potassium ion transport | GO:0015079; potassium ion transmembrane transporter activity | GO:0016020; membrane | UniGene:Zm.124122; Clone 319857 mRNA sequence
GRMZM2G142661_T03	transport.potassium	voltage-gated potassium channel beta subunit, putative, expressed	AT1G04690.1	KAB1 (POTASSIUM CHANNEL BETA SUBUNIT); oxidoreductase/ potassium channel	110.2745719	24.1258293	9.780347719	5.428775863	Uniprot/SPTREMBL:B4FMY9; Putative uncharacterized protein | GO:0055114; oxidation reduction | GO:0055085; transmembrane transport | GO:0016491; oxidoreductase activity | GO:0006813; potassium ion transport
GRMZM2G142661_T01	transport.potassium	voltage-gated potassium channel beta subunit, putative, expressed	AT1G04690.1	KAB1 (POTASSIUM CHANNEL BETA SUBUNIT); oxidoreductase/ potassium channel	110.2745719	24.1258293	9.780347719	5.428775863	Uniprot/SPTREMBL:B6SGM5; Putative uncharacterized proteinVoltage-gated potassium channel beta subunit ; | UniGene:Zm.94073; LOC100280467 | RefSeq_peptide:NP_001146859; LOC100280467 | RefSeq_dna:NM_001153387; LOC100280467 (si614064h02) mRNA | GO:0055114; oxidation reduction | GO:0055085; transmembrane transport | GO:0016491; oxidoreductase activity | GO:0006813; potassium ion transport | EntrezGen…
GRMZM2G142661_T02	transport.potassium	voltage-gated potassium channel beta subunit, putative, expressed	AT1G04690.1	KAB1 (POTASSIUM CHANNEL BETA SUBUNIT); oxidoreductase/ potassium channel	110.2745719	24.1258293	9.780347719	5.428775863	GO:0055114; oxidation reduction | GO:0055085; transmembrane transport | GO:0016491; oxidoreductase activity | GO:0006813; potassium ion transport
GRMZM2G166738_T03	transport.potassium	potassium transporter 9, putative, expressed	AT1G31120.1	KUP10; potassium ion transmembrane transporter	7.862291759	7.814592865	4.544835073	2.062796648	Uniprot/SPTREMBL:B7ZYN0; Putative uncharacterized protein | UniGene:Zm.54420; Transcribed locus | RefSeq_peptide:NP_001152920; hypothetical protein LOC100279538 | GO:0016020; membrane | GO:0015079; potassium ion transmembrane transporter activity | GO:0006813; potassium ion transport | EntrezGene:100279538; hypothetical protein LOC100279538
GRMZM2G166738_T01	transport.potassium	potassium transporter 9, putative, expressed	AT1G31120.1	KUP10; potassium ion transmembrane transporter	7.862291759	7.814592865	4.544835073	2.062796648	Uniprot/SPTREMBL:B7ZYN0; Putative uncharacterized protein | Uniprot/SPTREMBL:B4FW58; Putative uncharacterized protein | UniGene:Zm.54420; Transcribed locus | UniGene:Zm.118540; LOC100273533 | RefSeq_peptide:NP_001152920; hypothetical protein LOC100279538 | RefSeq_peptide:NP_001141423; hypothetical protein LOC100273533 | RefSeq_dna:NM_001147951; LOC100273533 (si603031f07b) mRNA | EntrezGene:100273…
GRMZM2G166738_T02	transport.potassium	potassium transporter 9, putative, expressed	AT1G31120.1	KUP10; potassium ion transmembrane transporter	7.862291759	7.814592865	4.544835073	2.062796648	Uniprot/SPTREMBL:B7ZYN0; Putative uncharacterized protein | UniGene:Zm.54420; Transcribed locus | UniGene:Zm.127233; Hypothetical protein LOC100279538 | RefSeq_peptide:NP_001152920; hypothetical protein LOC100279538 | RefSeq_dna:NM_001159448; hypothetical protein LOC100279538 (LOC100279538) mRNA | GO:0016020; membrane | GO:0015079; potassium ion transmembrane transporter activity | GO:0006813; po…
GRMZM2G166738_T04	transport.potassium	potassium transporter 9, putative, expressed	AT1G31120.1	KUP10; potassium ion transmembrane transporter	7.862291759	7.814592865	4.544835073	2.062796648	GO:0006813; potassium ion transport | GO:0015079; potassium ion transmembrane transporter activity | GO:0016020; membrane
GRMZM2G169114_T01	transport.potassium	inner membrane protein ybaL, putative, expressed	AT2G19600.1	ATKEA4; potassium ion transmembrane transporter/ potassium:hydrogen antiporter	14.2708857	5.971303751	5.392530694	3.613061067	GO:0006812; cation transport | GO:0015299; solute:hydrogen antiporter activity | GO:0016021; integral to membrane | GO:0055085; transmembrane transport
GRMZM2G169114_T02	transport.potassium	inner membrane protein ybaL, putative, expressed	AT2G19600.1	ATKEA4; potassium ion transmembrane transporter/ potassium:hydrogen antiporter	14.2708857	5.971303751	5.392530694	3.613061067	UniGene:Zm.104076; Clone 240044 mRNA sequence | GO:0055085; transmembrane transport | GO:0016021; integral to membrane | GO:0015299; solute:hydrogen antiporter activity | GO:0006812; cation transport
GRMZM2G171031_T01	transport.potassium	inner membrane protein ybaL, putative, expressed	AT2G19600.1	ATKEA4; potassium ion transmembrane transporter/ potassium:hydrogen antiporter	13.20868119	6.205980029	2.961046035	1.829775652	GO:0055085; transmembrane transport | GO:0046677; response to antibiotic | GO:0016021; integral to membrane | GO:0015904; tetracycline transport | GO:0015520; tetracycline:hydrogen antiporter activity | GO:0015299; solute:hydrogen antiporter activity | GO:0006812; cation transport
GRMZM2G171031_T02	transport.potassium	inner membrane protein ybaL, putative, expressed	AT2G19600.1	ATKEA4; potassium ion transmembrane transporter/ potassium:hydrogen antiporter	13.20868119	6.205980029	2.961046035	1.829775652	GO:0055085; transmembrane transport | GO:0016021; integral to membrane | GO:0015299; solute:hydrogen antiporter activity | GO:0006812; cation transport
GRMZM2G171031_T03	transport.potassium	inner membrane protein ybaL, putative, expressed	AT2G19600.1	ATKEA4; potassium ion transmembrane transporter/ potassium:hydrogen antiporter	13.20868119	6.205980029	2.961046035	1.829775652	Uniprot/SPTREMBL:B7ZXE5; Putative uncharacterized protein | UniGene:Zm.7610; Hypothetical protein LOC100279299 | RefSeq_peptide:NP_001145792; hypothetical protein LOC100279299 | RefSeq_dna:NM_001152320; hypothetical protein LOC100279299 (LOC100279299) mRNA | GO:0055085; transmembrane transport | GO:0016021; integral to membrane | GO:0015299; solute:hydrogen antiporter activity | GO:0006812; catio…
GRMZM2G173387_T02	transport.potassium	potassium transporter 8, putative, expressed	AT2G40540.2	KT2 (POTASSIUM TRANSPORTER 2); potassium ion transmembrane transporter	52.89171748	20.10884876	15.3523198	8.660614951	Uniprot/SPTREMBL:B7ZYN4; Putative uncharacterized protein | Uniprot/SPTREMBL:B4G092; Putative uncharacterized protein | RefSeq_peptide:NP_001146010; hypothetical protein LOC100279541 | GO:0016020; membrane | GO:0015079; potassium ion transmembrane transporter activity | GO:0006813; potassium ion transport | EntrezGene:100279541; LOC100279541
GRMZM2G173387_T04	transport.potassium	potassium transporter 8, putative, expressed	AT2G40540.2	KT2 (POTASSIUM TRANSPORTER 2); potassium ion transmembrane transporter	52.89171748	20.10884876	15.3523198	8.660614951	Uniprot/SPTREMBL:B7ZYN4; Putative uncharacterized protein | Uniprot/SPTREMBL:B4G092; Putative uncharacterized protein | RefSeq_peptide:NP_001146010; hypothetical protein LOC100279541 | GO:0016020; membrane | GO:0015079; potassium ion transmembrane transporter activity | GO:0006813; potassium ion transport | EntrezGene:100279541; LOC100279541
GRMZM2G173387_T01	transport.potassium	potassium transporter 8, putative, expressed	AT2G40540.2	KT2 (POTASSIUM TRANSPORTER 2); potassium ion transmembrane transporter	52.89171748	20.10884876	15.3523198	8.660614951	Uniprot/SPTREMBL:B7ZYN4; Putative uncharacterized protein | Uniprot/SPTREMBL:B4G092; Putative uncharacterized protein | UniGene:Zm.85758; LOC100279541 | RefSeq_peptide:NP_001146010; hypothetical protein LOC100279541 | RefSeq_dna:NM_001152538; LOC100279541 (si660001f06) mRNA | GO:0016020; membrane | GO:0015079; potassium ion transmembrane transporter activity | GO:0006813; potassium ion transport …
GRMZM2G173387_T03	transport.potassium	potassium transporter 8, putative, expressed	AT2G40540.2	KT2 (POTASSIUM TRANSPORTER 2); potassium ion transmembrane transporter	52.89171748	20.10884876	15.3523198	8.660614951	Uniprot/SPTREMBL:B4G092; Putative uncharacterized protein | GO:0016020; membrane | GO:0015079; potassium ion transmembrane transporter activity | GO:0006813; potassium ion transport
GRMZM2G173387_T05	transport.potassium	potassium transporter 8, putative, expressed	AT2G40540.2	KT2 (POTASSIUM TRANSPORTER 2); potassium ion transmembrane transporter	52.89171748	20.10884876	15.3523198	8.660614951	Uniprot/SPTREMBL:B7ZYN4; Putative uncharacterized protein | Uniprot/SPTREMBL:B4G092; Putative uncharacterized protein | RefSeq_peptide:NP_001146010; hypothetical protein LOC100279541 | GO:0016020; membrane | GO:0015079; potassium ion transmembrane transporter activity | GO:0006813; potassium ion transport | EntrezGene:100279541; LOC100279541
GRMZM2G173387_T06	transport.potassium	potassium transporter 8, putative, expressed	AT2G40540.2	KT2 (POTASSIUM TRANSPORTER 2); potassium ion transmembrane transporter	52.89171748	20.10884876	15.3523198	8.660614951	Uniprot/SPTREMBL:B4G092; Putative uncharacterized protein | GO:0016020; membrane | GO:0015079; potassium ion transmembrane transporter activity | GO:0006813; potassium ion transport
GRMZM2G173387_T07	transport.potassium	potassium transporter 8, putative, expressed	AT2G40540.2	KT2 (POTASSIUM TRANSPORTER 2); potassium ion transmembrane transporter	52.89171748	20.10884876	15.3523198	8.660614951	Uniprot/SPTREMBL:B7ZYN4; Putative uncharacterized protein | Uniprot/SPTREMBL:B4G092; Putative uncharacterized protein | RefSeq_peptide:NP_001146010; hypothetical protein LOC100279541 | GO:0016020; membrane | GO:0015079; potassium ion transmembrane transporter activity | GO:0006813; potassium ion transport | EntrezGene:100279541; LOC100279541
GRMZM2G173387_T08	transport.potassium	potassium transporter 8, putative, expressed	AT2G40540.2	KT2 (POTASSIUM TRANSPORTER 2); potassium ion transmembrane transporter	52.89171748	20.10884876	15.3523198	8.660614951	GO:0006813; potassium ion transport | GO:0015079; potassium ion transmembrane transporter activity | GO:0016020; membrane | Uniprot/SPTREMBL:B4G092; Putative uncharacterized protein
GRMZM2G356938_T01	transport.potassium	voltage-gated potassium channel beta subunit, putative, expressed	AT1G04690.1	KAB1 (POTASSIUM CHANNEL BETA SUBUNIT); oxidoreductase/ potassium channel	127.1103534	13.33068649	3.772840623	3.326619156	Uniprot/SPTREMBL:C4J2K0; Putative uncharacterized protein | Uniprot/SPTREMBL:B6T7A1; Voltage-gated potassium channel beta subunit | UniGene:Zm.117944; Voltage-gated potassium channel beta subunit | RefSeq_peptide:NP_001148812; voltage-gated potassium channel beta subunit | RefSeq_dna:NM_001155340; voltage-gated potassium channel beta subunit (LOC100282429) mRNA | GO:0055114; oxidation reduction |…
GRMZM2G375116_T02	transport.potassium	potassium transporter 8, putative, expressed	AT5G14880.1	potassium transporter, putative	17.67207562	6.60245704	1.530989613	0.86104765	GO:0016020; membrane | GO:0015079; potassium ion transmembrane transporter activity | GO:0006813; potassium ion transport
GRMZM2G375116_T01	transport.potassium	potassium transporter 8, putative, expressed	AT5G14880.1	potassium transporter, putative	17.67207562	6.60245704	1.530989613	0.86104765	Uniprot/SPTREMBL:B4FAH1; Putative uncharacterized protein | UniGene:Zm.14368; Hypothetical protein LOC100191870 | RefSeq_peptide:NP_001130766; hypothetical protein LOC100191870 | RefSeq_dna:NM_001137294; hypothetical protein LOC100191870 (LOC100191870) mRNA | GO:0016020; membrane | GO:0015079; potassium ion transmembrane transporter activity | GO:0006813; potassium ion transport | EntrezGene:1001…
GRMZM2G145107_T01	transport.sugars.sucrose	sucrose transport protein SUC3, putative, expressed	AT2G02860.1	SUT2 (SUCROSE TRANSPORTER 2); carbohydrate transmembrane transporter/ sucrose transmembrane transporter/ sucrose:hydrogen symporter/ sugar:hydrogen symporter	10.7423094	5.194565078	2.588959998	2.296030331	Uniprot/SPTREMBL:Q6PST5; Putative uncharacterized proteinSucrose transporter 2 ; | UniGene:Zm.8220; Sucrose transporter2 | RefSeq_peptide:NP_001146651; sucrose transporter2 | RefSeq_dna:NM_001153179; sucrose transporter2 (sut2) mRNA | MaizeGDB_GenBank:AY581895; product:sucrose transporter 2 | GO:0055085; transmembrane transport | GO:0015770; sucrose transport | GO:0008515; sucrose transmembrane t…
GRMZM2G060183_T01	transport.sugars	major myo-inositol transporter iolT, putative, expressed	AT3G18830.1	ATPLT5 (POLYOL TRANSPORTER 5); D-ribose transmembrane transporter/ D-xylose transmembrane transporter/ carbohydrate transmembrane transporter/ galactose transmembrane transporter/ glucose transmembrane transporter/ glycerol transmembrane transporter/ mann	19.20393379	18.33397207	8.402954851	6.733415194	RefSeq_dna:NM_001152530; hypothetical protein LOC100279532 (LOC100279532) mRNA | RefSeq_peptide:NP_001146002; hypothetical protein LOC100279532 | UniGene:Zm.137502; Transcribed locus moderately similar to NP_001146002.1 hypothetical protein LOC100279532 [Zea mays] | UniGene:Zm.28705; Hypothetical protein LOC100279532 | Uniprot/SPTREMBL:B6TI70; Major myo-inositol transporter iolTPutative uncharact…
GRMZM2G060183_T02	transport.sugars	major myo-inositol transporter iolT, putative, expressed	AT3G18830.1	ATPLT5 (POLYOL TRANSPORTER 5); D-ribose transmembrane transporter/ D-xylose transmembrane transporter/ carbohydrate transmembrane transporter/ galactose transmembrane transporter/ glucose transmembrane transporter/ glycerol transmembrane transporter/ mann	19.20393379	18.33397207	8.402954851	6.733415194	GO:0055085; transmembrane transport | GO:0022891; substrate-specific transmembrane transporter activity | GO:0016020; membrane | GO:0006810; transport | GO:0005215; transporter activity
GRMZM2G102683_T01	transport.sugars	carbohydrate transporter/ sugar porter, putative, expressed	AT3G18830.1	ATPLT5 (POLYOL TRANSPORTER 5); D-ribose transmembrane transporter/ D-xylose transmembrane transporter/ carbohydrate transmembrane transporter/ galactose transmembrane transporter/ glucose transmembrane transporter/ glycerol transmembrane transporter/ mann	8.309469333	0.481783683	1.067975339	0.359943645	Uniprot/SPTREMBL:C4J5A0; Putative uncharacterized protein | Uniprot/SPTREMBL:B6U7I8; Carbohydrate transporter/ sugar porter | Uniprot/SPTREMBL:B4FL25; Putative uncharacterized protein | UniGene:Zm.19048; Carbohydrate transporter/ sugar porter | RefSeq_peptide:NP_001151999; carbohydrate transporter/ sugar porter | RefSeq_dna:NM_001158527; carbohydrate transporter/ sugar porter (LOC100285636) mRNA …
GRMZM2G442523_T01	transport.sugars	sugar transport protein 5, putative, expressed	AT1G34580.1	monosaccharide transporter, putative	52.4132526	15.33062276	14.24759571	10.1387695	RefSeq_dna:NM_001158287; sugar transport protein 5 (LOC100285394) mRNA | RefSeq_peptide:NP_001151759; sugar transport protein 5 | UniGene:Zm.95139; Sugar transport protein 5 | Uniprot/SPTREMBL:B6U4F9; Sugar transport protein 5 | Uniprot/SPTREMBL:C0PI42; Putative uncharacterized protein | GO:0055085; transmembrane transport | GO:0022891; substrate-specific transmembrane transporter activity | Entr…
GRMZM2G442523_T02	transport.sugars	sugar transport protein 5, putative, expressed	AT1G34580.1	monosaccharide transporter, putative	52.4132526	15.33062276	14.24759571	10.1387695	Uniprot/SPTREMBL:B4FYT1; Putative uncharacterized protein | Uniprot/SPTREMBL:B4FF36; Putative uncharacterized protein | GO:0055085; transmembrane transport | GO:0022891; substrate-specific transmembrane transporter activity | GO:0016021; integral to membrane | GO:0016020; membrane | GO:0006810; transport | GO:0005215; transporter activity
GRMZM2G442523_T03	transport.sugars	sugar transport protein 5, putative, expressed	AT1G34580.1	monosaccharide transporter, putative	52.4132526	15.33062276	14.24759571	10.1387695	Uniprot/SPTREMBL:B4FF36; Putative uncharacterized protein | GO:0055085; transmembrane transport | GO:0016021; integral to membrane | GO:0016020; membrane | GO:0006810; transport | GO:0005215; transporter activity
GRMZM2G154211_T01	transport.sulphate	sulfate transporter 3.1, putative, expressed	AT3G51895.1	SULTR3;1 (SULFATE TRANSPORTER 3;1); secondary active sulfate transmembrane transporter/ sulfate transmembrane transporter/ transporter	44.31121038	30.8146182	11.19834229	6.744191662	Uniprot/SPTREMBL:C0P5B8; Putative uncharacterized protein | Uniprot/SPTREMBL:B4FTI7; Putative uncharacterized protein | UniGene:Zm.41882; Hypothetical protein LOC100273198 | RefSeq_peptide:NP_001141114; hypothetical protein LOC100273198 | RefSeq_dna:NM_001147642; hypothetical protein LOC100273198 (LOC100273198) mRNA | GO:0055085; transmembrane transport | GO:0016021; integral to membrane | GO:001…
GRMZM2G154211_T02	transport.sulphate	sulfate transporter 3.1, putative, expressed	AT3G51895.1	SULTR3;1 (SULFATE TRANSPORTER 3;1); secondary active sulfate transmembrane transporter/ sulfate transmembrane transporter/ transporter	44.31121038	30.8146182	11.19834229	6.744191662	GO:0055085; transmembrane transport | GO:0016021; integral to membrane | GO:0016020; membrane | GO:0006955; immune response | GO:0006810; transport | GO:0005215; transporter activity | GO:0005164; tumor necrosis factor receptor binding
GRMZM2G154211_T03	transport.sulphate	sulfate transporter 3.1, putative, expressed	AT3G51895.1	SULTR3;1 (SULFATE TRANSPORTER 3;1); secondary active sulfate transmembrane transporter/ sulfate transmembrane transporter/ transporter	44.31121038	30.8146182	11.19834229	6.744191662	Uniprot/SPTREMBL:B4FTI7; Putative uncharacterized protein | GO:0055085; transmembrane transport | GO:0016021; integral to membrane | GO:0006810; transport | GO:0005215; transporter activity
GRMZM2G057616_T01	transport.unspecified anions	chloride channel protein CLC-a, putative, expressed	AT5G40890.1	ATCLC-A (CHLORIDE CHANNEL A); anion channel/ nitrate transmembrane transporter/ voltage-gated chloride channel	10.3612837	10.24394549	6.691316865	3.881355086	Uniprot/SPTREMBL:C9DQ40; Chloride channel protein | UniGene:Zm.26990; TSA: Zea mays contig56451 mRNA sequence | GO:0055085; transmembrane transport | GO:0016020; membrane | GO:0006821; chloride transport | GO:0005247; voltage-gated chloride channel activity | GO:0005216; ion channel activity
GRMZM2G057616_T02	transport.unspecified anions	chloride channel protein CLC-a, putative, expressed	AT5G40890.1	ATCLC-A (CHLORIDE CHANNEL A); anion channel/ nitrate transmembrane transporter/ voltage-gated chloride channel	10.3612837	10.24394549	6.691316865	3.881355086	GO:0055085; transmembrane transport | GO:0005216; ion channel activity
GRMZM2G113276_T01	transport.unspecified anions	CCC1, putative, expressed	AT1G30450.3	CCC1 (CATION-CHLORIDE CO-TRANSPORTER 1); cation:chloride symporter/ sodium:potassium:chloride symporter	9.509319723	3.247433886	0.684876396	0.474833812	UniGene:Zm.66845; Transcribed locus strongly similar to NP_001061543.1 Os08g0323700 [Oryza sativa Japonica Group] | UniGene:Zm.122174; TSA: Zea mays contig26726 mRNA sequence | GO:0055085; transmembrane transport | GO:0016020; membrane | GO:0006810; transport
GRMZM2G113276_T02	transport.unspecified anions	CCC1, putative, expressed	AT1G30450.3	CCC1 (CATION-CHLORIDE CO-TRANSPORTER 1); cation:chloride symporter/ sodium:potassium:chloride symporter	9.509319723	3.247433886	0.684876396	0.474833812	UniGene:Zm.66845; Transcribed locus strongly similar to NP_001061543.1 Os08g0323700 [Oryza sativa Japonica Group] | UniGene:Zm.122174; TSA: Zea mays contig26726 mRNA sequence | GO:0055085; transmembrane transport | GO:0016020; membrane | GO:0006814; sodium ion transport | GO:0006810; transport | GO:0005283; sodium:amino acid symporter activity
GRMZM2G128969_T01	transport.unspecified anions	chloride channel protein CLC-f, putative, expressed	AT1G55620.2	CLC-F (CHLORIDE CHANNEL F); ion channel/ voltage-gated chloride channel	10.99186094	2.175526164	0.739736551	0.315437284	Uniprot/SPTREMBL:C0PFB5; Putative uncharacterized protein | GO:0055085; transmembrane transport | GO:0016020; membrane | GO:0006821; chloride transport | GO:0005247; voltage-gated chloride channel activity | GO:0005216; ion channel activity
GRMZM2G128969_T02	transport.unspecified anions	chloride channel protein CLC-f, putative, expressed	AT1G55620.2	CLC-F (CHLORIDE CHANNEL F); ion channel/ voltage-gated chloride channel	10.99186094	2.175526164	0.739736551	0.315437284	Uniprot/SPTREMBL:B6SQ08; Putative uncharacterized protein | RefSeq_peptide:NP_001142822; hypothetical protein LOC100275204 | RefSeq_dna:NM_001149350; hypothetical protein LOC100275204 (LOC100275204) mRNA | GO:0055085; transmembrane transport | GO:0005216; ion channel activity | EntrezGene:100275204; hypothetical protein LOC100275204
GRMZM2G128969_T03	transport.unspecified anions	chloride channel protein CLC-f, putative, expressed	AT1G55620.2	CLC-F (CHLORIDE CHANNEL F); ion channel/ voltage-gated chloride channel	10.99186094	2.175526164	0.739736551	0.315437284	Uniprot/SPTREMBL:B6SQ08; Putative uncharacterized protein | Uniprot/SPTREMBL:B4FLR2; Putative uncharacterized protein | RefSeq_peptide:NP_001142822; hypothetical protein LOC100275204 | RefSeq_dna:NM_001149350; hypothetical protein LOC100275204 (LOC100275204) mRNA | GO:0055085; transmembrane transport | GO:0016020; membrane | GO:0006821; chloride transport | GO:0005247; voltage-gated chloride chan…
GRMZM2G344163_T01	transport.unspecified anions	chloride channel-like protein CLC-g, putative, expressed	AT5G33280.1	chloride channel-like (CLC) protein, putative	22.90015006	9.25045224	10.48783527	7.181201248	Uniprot/SPTREMBL:C0PHC1; Putative uncharacterized protein | UniGene:Zm.31711; Hypothetical protein LOC100383583 | RefSeq_peptide:NP_001169702; hypothetical protein LOC100383583 | RefSeq_dna:NM_001176231; hypothetical protein LOC100383583 (LOC100383583) mRNA | GO:0055085; transmembrane transport | GO:0016020; membrane | GO:0006821; chloride transport | GO:0005247; voltage-gated chloride channel ac…
GRMZM2G063492_T01	transport.unspecified cations	sodium/hydrogen exchanger 2, putative, expressed	AT3G05030.1	NHX2 (SODIUM HYDROGEN EXCHANGER 2); sodium ion transmembrane transporter/ sodium:hydrogen antiporter	22.56184627	13.5989542	13.1298275	10.31688788	GO:0017153; sodium:dicarboxylate symporter activity | GO:0055085; transmembrane transport | RefSeq_dna:NM_001176080; hypothetical protein LOC100383429 (LOC100383429) mRNA | RefSeq_peptide:NP_001169551; hypothetical protein LOC100383429 | UniGene:Zm.95531; Hypothetical protein LOC100383429 | Uniprot/SPTREMBL:C0PDW9; Putative uncharacterized protein | Uniprot/SPTREMBL:C0PFZ2; Sodium/hydrogen exchan…
GRMZM2G064467_T01	transport.unspecified cations	MRS2-5, putative, expressed	AT1G80900.1	magnesium transporter CorA-like family protein (MGT1) (MRS2)	10.08302381	9.321763158	6.110115086	3.048367973	Uniprot/SPTREMBL:C0HG11; Putative uncharacterized protein | UniGene:Zm.79546; Hypothetical protein LOC100381441 | RefSeq_peptide:NP_001167751; hypothetical protein LOC100381441 | RefSeq_dna:NM_001174280; hypothetical protein LOC100381441 (LOC100381441) mRNA | GO:0055085; transmembrane transport | GO:0046873; metal ion transmembrane transporter activity | GO:0030001; metal ion transport | GO:00160…
GRMZM2G073814_T02	amino acid metabolism.synthesis.serine-glycine-cysteine group.serine.phosphoglycerate dehydrogenase	D-3-phosphoglycerate dehydrogenase, chloroplast precursor, putative, expressed	AT4G34200.1	EDA9 (embryo sac development arrest 9); ATP binding	339.5858023	33.41709228	4.58783744	5.367278533	GO:0055114; oxidation reduction | RefSeq_dna:NM_001153607; LOC100280688 (umc2594) mRNA | RefSeq_peptide:NP_001147079; LOC100280688 | UniGene:Zm.142987; Hypothetical protein LOC100383999 | UniGene:Zm.21677; LOC100280688 | Uniprot/SPTREMBL:B4FWI4; Putative uncharacterized protein | Uniprot/SPTREMBL:B6SKK1; D-3-phosphoglycerate dehydrogenase | GO:0051287; NAD or NADH binding | GO:0048037; cofactor b…
GRMZM2G106250_T01	Biodegradation of Xenobiotics.3-hydroxybutyryl-CoA dehydrogenase	3-hydroxybutyryl-CoA dehydrogenase, putative, expressed	AT3G15290.1	3-hydroxybutyryl-CoA dehydrogenase, putative	15.26238474	9.517744525	3.408153311	5.530596782	Uniprot/SPTREMBL:B6U310; 3-hydroxybutyryl-CoA dehydrogenase | Uniprot/SPTREMBL:B4F890; Putative uncharacterized protein | UniGene:Zm.84841; Hypothetical protein LOC100191282 | RefSeq_peptide:NP_001130188; hypothetical protein LOC100191282 | RefSeq_dna:NM_001136716; hypothetical protein LOC100191282 (LOC100191282) mRNA | GO:0016491; oxidoreductase activity | GO:0008324; cation transmembrane transp…
GRMZM2G026346_T01	cell.cycle	cyclin-A2, putative, expressed	AT1G47230.1	cyclin, putative	12.92783282	0.145536244	0.016130592	0	GO:0030288; outer membrane-bounded periplasmic space | GO:0005381; iron ion transmembrane transporter activity | GO:0005634; nucleus | GO:0006826; iron ion transport
GRMZM2G026346_T02	cell.cycle	cyclin-A2, putative, expressed	AT1G47230.1	cyclin, putative	12.92783282	0.145536244	0.016130592	0	RefSeq_dna:NM_001152993; hypothetical protein LOC100280053 (LOC100280053) mRNA | RefSeq_peptide:NP_001146465; hypothetical protein LOC100280053 | UniGene:Zm.100040; Hypothetical protein LOC100280053 | Uniprot/SPTREMBL:B8A1M4; Putative uncharacterized protein | GO:0030288; outer membrane-bounded periplasmic space | GO:0006826; iron ion transport | GO:0005634; nucleus | GO:0005381; iron ion transme…
GRMZM2G154245_T02	development.unspecified	nodulin-like protein, putative, expressed	AT5G64700.1	nodulin MtN21 family protein	9.191016133	1.539319802	0.454963682	0.4921963	Uniprot/SPTREMBL:B6U9R3; Putative uncharacterized protein | RefSeq_peptide:NP_001145229; hypothetical protein LOC100278497 | GO:0055085; transmembrane transport | GO:0016020; membrane | EntrezGene:100278497; hypothetical protein LOC100278497
GRMZM2G083344_T03	major CHO metabolism.degradation.starch.transporter	triose phosphate/phosphate translocator, chloroplast precursor, putative, expressed	AT5G46110.4	APE2 (ACCLIMATION OF PHOTOSYNTHESIS TO ENVIRONMENT 2); antiporter/ triose-phosphate transmembrane transporter	27.33925607	7.072756843	0.556325358	0.738637843	Uniprot/SPTREMBL:B6T5Y2; Triose phosphate/phosphate translocator | Uniprot/SPTREMBL:B4FWC0; Putative uncharacterized proteinTriose phosphate/phosphate translocator ; | Uniprot/SPTREMBL:B4FCM2; Putative uncharacterized protein | UniGene:Zm.4404; Hypothetical protein LOC100273570 | RefSeq_peptide:NP_001141460; hypothetical protein LOC100273570 | RefSeq_dna:NM_001147988; hypothetical protein LOC1002…
GRMZM2G136859_T01	metal handling.binding, chelation and storage	metal ion binding protein, putative, expressed	AT2G18196.1	metal ion binding	4.165586958	0.826851934	0.710245663	1.67306296	RefSeq_peptide:NP_001148571; LOC100282187 | RefSeq_dna:NM_001155099; LOC100282187 (cl15090_1) mRNA | GO:0046872; metal ion binding | GO:0030001; metal ion transport | GO:0015694; mercury ion transport | GO:0015097; mercury ion transmembrane transporter activity | EntrezGene:100282187; LOC100282187 | Uniprot/SPTREMBL:B6T4Q0; Metal ion binding protein
GRMZM2G150450_T01	metal handling.binding, chelation and storage	metal ion binding protein, putative, expressed	AT3G24450.1	copper-binding family protein	78.3464293	18.74129106	2.349810304	2.641801072	GO:0030001; metal ion transport | GO:0046872; metal ion binding | GO:0046873; metal ion transmembrane transporter activity | RefSeq_dna:NM_001154719; metal ion binding protein (LOC100281799) mRNA | RefSeq_peptide:NP_001148191; metal ion binding protein | UniGene:Zm.2581; Transcribed locus strongly similar to NP_001044085.1 Os01g0719600 [Oryza sativa Japonica Group] | Uniprot/SPTREMBL:B6SZ51; Meta…
GRMZM2G462325_T03	misc.misc2	dolichyl-diphosphooligosaccharide--protein glycosyltransferase 48 kDasubunit precursor, putative, expressed	AT5G66680.1	DGL1; dolichyl-diphosphooligosaccharide-protein glycotransferase	24.77312643	3.216795949	2.399178467	3.262869754	Uniprot/SPTREMBL:C0PEP7; Putative uncharacterized protein | Uniprot/SPTREMBL:B4FN66; Putative uncharacterized protein | UniGene:Zm.79871; Transcribed locus strongly similar to XP_002461678.1 hypothetical protein SORBIDRAFT_02g006340 [Sorghum bicolor] | RefSeq_peptide:NP_001140313; hypothetical protein LOC100272358 | GO:0055085; transmembrane transport | EntrezGene:100272358; hypothetical protein …
GRMZM2G423886_T01	misc.oxidases - copper, flavone etc.	disulfide oxidoreductase/ monooxygenase, putative, expressed	AT1G12200.1	flavin-containing monooxygenase family protein / FMO family protein	4.675719148	0.524846817	0.340080671	0.697095797	Uniprot/SPTREMBL:B4FMY2; Putative uncharacterized protein | UniGene:Zm.103559; Hypothetical protein LOC100272315 | RefSeq_peptide:NP_001140271; hypothetical protein LOC100272315 | RefSeq_dna:NM_001146799; hypothetical protein LOC100272315 (LOC100272315) mRNA | GO:0055114; oxidation reduction | GO:0050661; NADP or NADPH binding | GO:0050660; FAD binding | GO:0008324; cation transmembrane transport…
GRMZM2G139193_T01	misc.plastocyanin-like	early nodulin-like protein 3 precursor, putative, expressed	AT3G20570.1	plastocyanin-like domain-containing protein	19.54209759	2.904262345	0.096568668	0.104471506	Uniprot/SPTREMBL:C0P5C5; Putative uncharacterized protein | Uniprot/SPTREMBL:B6U9I7; Putative uncharacterized protein | Uniprot/SPTREMBL:B6TWI8; Early nodulin-like protein 3 | UniGene:Zm.127291; Early nodulin-like protein 3 | RefSeq_peptide:NP_001151061; early nodulin-like protein 3 | RefSeq_dna:NM_001157589; early nodulin-like protein 3 (LOC100284694) mRNA | GO:0055085; transmembrane transport |…
GRMZM2G042078_T01	mitochondrial electron transport / ATP synthesis.F1-ATPase	hydrogen-transporting ATP synthase, rotational mechanism, putative, expressed	AT4G29480.1	mitochondrial ATP synthase g subunit family protein	164.5729571	43.4317636	15.92418173	25.37998554	Uniprot/SPTREMBL:B4FJB5; Hydrogen-transporting ATP synthase rotational mechanismPutative uncharacterized protein ; | RefSeq_peptide:NP_001149611; LOC100283237 | GO:0015986; ATP synthesis coupled proton transport | GO:0015078; hydrogen ion transmembrane transporter activity | GO:0000276; mitochondrial proton-transporting ATP synthase complex coupling factor F(o) | EntrezGene:100283237; LOC100283237
GRMZM2G042078_T02	mitochondrial electron transport / ATP synthesis.F1-ATPase	hydrogen-transporting ATP synthase, rotational mechanism, putative, expressed	AT4G29480.1	mitochondrial ATP synthase g subunit family protein	164.5729571	43.4317636	15.92418173	25.37998554	Uniprot/SPTREMBL:B4FJB5; Hydrogen-transporting ATP synthase rotational mechanismPutative uncharacterized protein ; | UniGene:Zm.2123; LOC100283237 | RefSeq_peptide:NP_001149611; LOC100283237 | RefSeq_dna:NM_001156139; LOC100283237 (pco141739) mRNA | GO:0015986; ATP synthesis coupled proton transport | GO:0015078; hydrogen ion transmembrane transporter activity | GO:0000276; mitochondrial proton-t…
GRMZM2G066111_T01	mitochondrial electron transport / ATP synthesis.F1-ATPase	hypothetical protein	ATMG00640.1	0	5.868687725	1.233567742	0.884310465	2.179193327	Uniprot/SPTREMBL:D2JSQ1; ATP synthase subunit 4 | Uniprot/SPTREMBL:Q36279; Putative uncharacterized protein Fragment | Uniprot/SPTREMBL:Q36280; Putative uncharacterized protein Fragment | Uniprot/SPTREMBL:Q36565; Mitochondrial DNA sequence T Fragment | Uniprot/SPTREMBL:Q6R9J5; ATPase subunit 4 | Uniprot/SWISSPROT:P09004; ATP synthase protein MI25 (ORF 25) | UniGene:Zm.109675; Transcribed locus | …
GRMZM2G069229_T01	mitochondrial electron transport / ATP synthesis.F1-ATPase	hydrogen-transporting ATP synthase, rotational mechanism, putative, expressed	AT4G29480.1	mitochondrial ATP synthase g subunit family protein	3.927604084	0.10093208	0.089494914	0	GO:0015986; ATP synthesis coupled proton transport | GO:0015078; hydrogen ion transmembrane transporter activity | GO:0000276; mitochondrial proton-transporting ATP synthase complex coupling factor F(o)
GRMZM2G069229_T02	mitochondrial electron transport / ATP synthesis.F1-ATPase	hydrogen-transporting ATP synthase, rotational mechanism, putative, expressed	AT4G29480.1	mitochondrial ATP synthase g subunit family protein	3.927604084	0.10093208	0.089494914	0	GO:0000276; mitochondrial proton-transporting ATP synthase complex coupling factor F(o) | GO:0015078; hydrogen ion transmembrane transporter activity | GO:0015986; ATP synthesis coupled proton transport
GRMZM2G004180_T01	not assigned	NA	0	NA	9.680308841	1.271066309	0.090162786	0	RefSeq_dna:NM_001174368; hypothetical protein LOC100381539 (LOC100381539) mRNA | RefSeq_peptide:NP_001143766; hypothetical protein LOC100276528 | RefSeq_peptide:NP_001167839; hypothetical protein LOC100381539 | UniGene:Zm.123632; Hypothetical protein LOC100276528 | UniGene:Zm.4410; Hypothetical protein LOC100381539 | Uniprot/SPTREMBL:B6TDE8; Putative uncharacterized protein | Uniprot/SPTREMBL:C0H…
GRMZM2G023037_T01	not assigned	NA	0	NA	4.104833439	1.403378984	0.28938475	0.633960623	Uniprot/SPTREMBL:B6ST31; Cyclic nucleotide-gated ion channel 9 | UniGene:Zm.77304; LOC100281197 | RefSeq_peptide:NP_001147588; LOC100281197 | RefSeq_dna:NM_001154116; LOC100281197 (si660042c08) mRNA | GO:0055085; transmembrane transport | GO:0016020; membrane | GO:0006813; potassium ion transport | GO:0005249; voltage-gated potassium channel activity | GO:0005216; ion channel activity | EntrezGen…
GRMZM2G023285_T01	not assigned	plant-specific domain TIGR01568 family protein, expressed	AT2G18500.1	OFP7 (ARABIDOPSIS THALIANA OVATE FAMILY PROTEIN 7)	4.654548363	3.754595043	0.093778629	0	UniGene:Zm.32020; TSA: Zea mays contig16071 mRNA sequence | GO:0005215; transporter activity | GO:0006810; transport | GO:0016020; membrane | GO:0055085; transmembrane transport
GRMZM2G074805_T01	not assigned	expressed protein	AT2G37230.1	pentatricopeptide (PPR) repeat-containing protein	27.18900323	4.984340717	1.046044444	3.458602319	Uniprot/SPTREMBL:B6SVM0; Putative uncharacterized protein | Uniprot/SPTREMBL:B4FC78; Putative uncharacterized protein | Uniprot/SPTREMBL:B4FB26; Putative uncharacterized protein | UniGene:Zm.79216; Hypothetical protein LOC100192035 | RefSeq_peptide:NP_001130930; hypothetical protein LOC100192035 | RefSeq_dna:NM_001137458; hypothetical protein LOC100192035 (LOC100192035) mRNA | GO:0055085; transme…
GRMZM2G086430_T01	not assigned	beta-lactamase, class A, putative, expressed	AT1G63010.4	SPX (SYG1/Pho81/XPR1) domain-containing protein	32.72632735	7.900821504	0.095778815	0.099916406	Uniprot/SPTREMBL:B4FG02; Putative uncharacterized protein | UniGene:Zm.96383; LOC100193704 | RefSeq_peptide:NP_001132268; hypothetical protein LOC100193704 | RefSeq_dna:NM_001138796; LOC100193704 (cl35113_1) mRNA | GO:0055085; transmembrane transport | EntrezGene:100193704; LOC100193704
GRMZM2G087101_T01	not assigned	metal ion binding protein, putative, expressed	AT5G02600.2	heavy-metal-associated domain-containing protein	68.34651663	17.06682406	8.33895664	12.52393233	GO:0046872; metal ion binding | GO:0030001; metal ion transport | GO:0015694; mercury ion transport | GO:0015097; mercury ion transmembrane transporter activity
GRMZM2G100864_T01	not assigned	phosphoribosylanthranilate transferase, putative, expressed	AT1G22610.1	C2 domain-containing protein	57.57035077	1.641352472	0.005775245	0.018743613	Uniprot/SPTREMBL:C0P6C6; Putative uncharacterized protein | Uniprot/SPTREMBL:B6U8U3; Phosphoribosylanthranilate transferase | UniGene:Zm.122785; Phosphoribosylanthranilate transferase | RefSeq_peptide:NP_001152102; phosphoribosylanthranilate transferase | RefSeq_dna:NM_001158630; phosphoribosylanthranilate transferase (LOC100285739) mRNA | GO:0055085; transmembrane transport | GO:0016020; membran…
GRMZM2G100864_T02	not assigned	phosphoribosylanthranilate transferase, putative, expressed	AT1G22610.1	C2 domain-containing protein	57.57035077	1.641352472	0.005775245	0.018743613	Uniprot/SPTREMBL:C0P6C6; Putative uncharacterized protein | Uniprot/SPTREMBL:B6U8U3; Phosphoribosylanthranilate transferase | RefSeq_peptide:NP_001152102; phosphoribosylanthranilate transferase | GO:0055085; transmembrane transport | GO:0016020; membrane | GO:0008021; synaptic vesicle | GO:0006810; transport | GO:0005215; transporter activity | EntrezGene:100285739; phosphoribosylanthranilate tra…
GRMZM2G100864_T03	not assigned	phosphoribosylanthranilate transferase, putative, expressed	AT1G22610.1	C2 domain-containing protein	57.57035077	1.641352472	0.005775245	0.018743613	Uniprot/SPTREMBL:C0P6C6; Putative uncharacterized protein | Uniprot/SPTREMBL:B6U8U3; Phosphoribosylanthranilate transferase | RefSeq_peptide:NP_001152102; phosphoribosylanthranilate transferase | GO:0055085; transmembrane transport | GO:0016020; membrane | GO:0008021; synaptic vesicle | GO:0006810; transport | GO:0005215; transporter activity | EntrezGene:100285739; phosphoribosylanthranilate tra…
GRMZM2G106216_T01	not assigned	expressed protein	AT1G09290.1	unknown protein	16.58210398	9.516453283	8.773697772	10.19191399	Uniprot/SPTREMBL:B4FL57; Putative uncharacterized protein | UniGene:Zm.79590; Hypothetical protein LOC100217057 | RefSeq_peptide:NP_001136900; hypothetical protein LOC100217057 | RefSeq_dna:NM_001143428; hypothetical protein LOC100217057 (LOC100217057) mRNA | GO:0055085; transmembrane transport | GO:0016020; membrane | GO:0006810; transport | GO:0005215; transporter activity | EntrezGene:10021705…
GRMZM2G106216_T02	not assigned	expressed protein	AT1G09290.1	unknown protein	16.58210398	9.516453283	8.773697772	10.19191399	GO:0055085; transmembrane transport | GO:0016020; membrane | GO:0006810; transport | GO:0005215; transporter activity
GRMZM2G106216_T03	not assigned	expressed protein	AT1G09290.1	unknown protein	16.58210398	9.516453283	8.773697772	10.19191399	GO:0005215; transporter activity | GO:0006810; transport | GO:0016020; membrane | GO:0055085; transmembrane transport
GRMZM2G106216_T04	not assigned	expressed protein	AT1G09290.1	unknown protein	16.58210398	9.516453283	8.773697772	10.19191399	Uniprot/SPTREMBL:B6TF05; Putative uncharacterized protein | GO:0055085; transmembrane transport | GO:0016020; membrane | GO:0006810; transport | GO:0005215; transporter activity
GRMZM2G108149_T01	not assigned	phosphoribosylanthranilate transferase, putative, expressed	AT3G57880.1	C2 domain-containing protein	34.61894058	0.856713915	0.005425964	0.035220035	Uniprot/SPTREMBL:B4FXX0; Putative uncharacterized protein | UniGene:Zm.123941; Transcribed locus strongly similar to XP_002438680.1 hypothetical protein SORBIDRAFT_10g024200 [Sorghum bicolor] | UniGene:Zm.118147; Transcribed locus strongly similar to XP_002438680.1 hypothetical protein SORBIDRAFT_10g024200 [Sorghum bicolor] | RefSeq_peptide:NP_001141740; hypothetical protein LOC100273873 | RefSeq…
GRMZM2G108149_T02	not assigned	phosphoribosylanthranilate transferase, putative, expressed	AT3G57880.1	C2 domain-containing protein	34.61894058	0.856713915	0.005425964	0.035220035	RefSeq_dna:NM_001148268; LOC100273873 (pco099302) mRNA | RefSeq_peptide:NP_001141740; hypothetical protein LOC100273873 | UniGene:Zm.118147; Transcribed locus strongly similar to XP_002438680.1 hypothetical protein SORBIDRAFT_10g024200 [Sorghum bicolor] | Uniprot/SPTREMBL:B4FXX0; Putative uncharacterized protein | GO:0055085; transmembrane transport | GO:0016020; membrane | GO:0008021; synaptic v…
GRMZM2G125494_T01	not assigned	mechanosensitive ion channel family protein, expressed	AT4G00290.1	mechanosensitive ion channel domain-containing protein / MS ion channel domain-containing protein	9.02573816	5.049974033	3.668413687	4.541414733	Uniprot/SPTREMBL:B4FE51; Putative uncharacterized protein | UniGene:Zm.26335; LOC100193189 | RefSeq_peptide:NP_001131816; hypothetical protein LOC100193189 | GO:0055085; transmembrane transport | GO:0016020; membrane | EntrezGene:100193189; LOC100193189
GRMZM2G125494_T02	not assigned	mechanosensitive ion channel family protein, expressed	AT4G00290.1	mechanosensitive ion channel domain-containing protein / MS ion channel domain-containing protein	9.02573816	5.049974033	3.668413687	4.541414733	GO:0016020; membrane | GO:0055085; transmembrane transport
GRMZM2G125494_T04	not assigned	mechanosensitive ion channel family protein, expressed	AT4G00290.1	mechanosensitive ion channel domain-containing protein / MS ion channel domain-containing protein	9.02573816	5.049974033	3.668413687	4.541414733	Uniprot/SPTREMBL:B4FE51; Putative uncharacterized protein | RefSeq_peptide:NP_001131816; hypothetical protein LOC100193189 | RefSeq_dna:NM_001138344; LOC100193189 (cl61573_1) mRNA | GO:0055085; transmembrane transport | GO:0016020; membrane | EntrezGene:100193189; LOC100193189
GRMZM2G126260_T02	not assigned	NA	0	NA	15.08909414	4.209650322	0.129705352	0.140319979	Uniprot/SPTREMBL:C0PGY4; Putative uncharacterized protein | UniGene:Zm.86586; Hypothetical protein LOC100383548 | UniGene:Zm.140251; Transcribed locus moderately similar to NP_001066091.1 Os12g0133800 [Oryza sativa Japonica Group] | RefSeq_peptide:NP_001169667; hypothetical protein LOC100383548 | RefSeq_dna:NM_001176196; hypothetical protein LOC100383548 (LOC100383548) mRNA | GO:0055085; transmem…
GRMZM2G129169_T01	not assigned	protein GPR89A, putative, expressed	AT1G64990.2	GTG1 (GPCR-TYPE G PROTEIN 1)	6.945430588	4.143527507	2.152225856	2.557664234	Uniprot/SPTREMBL:C4IZZ7; Putative uncharacterized protein | Uniprot/SPTREMBL:C0PMR5; Putative uncharacterized protein | Uniprot/SPTREMBL:B4FPW8; Putative uncharacterized protein | UniGene:Zm.19341; Hypothetical protein LOC100272676 | RefSeq_peptide:NP_001140605; hypothetical protein LOC100272676 | GO:0016021; integral to membrane | GO:0016020; membrane | GO:0015450; P-P-bond-hydrolysis-driven pro…
GRMZM2G129169_T02	not assigned	protein GPR89A, putative, expressed	AT1G64990.2	GTG1 (GPCR-TYPE G PROTEIN 1)	6.945430588	4.143527507	2.152225856	2.557664234	Uniprot/SPTREMBL:C4IZZ7; Putative uncharacterized protein | GO:0016020; membrane | GO:0015450; P-P-bond-hydrolysis-driven protein transmembrane transporter activity | GO:0015031; protein transport
GRMZM2G129169_T04	not assigned	protein GPR89A, putative, expressed	AT1G64990.2	GTG1 (GPCR-TYPE G PROTEIN 1)	6.945430588	4.143527507	2.152225856	2.557664234	Uniprot/SPTREMBL:C0PMR5; Putative uncharacterized protein | Uniprot/SPTREMBL:B4FPW8; Putative uncharacterized protein | RefSeq_peptide:NP_001140605; hypothetical protein LOC100272676 | RefSeq_dna:NM_001147133; hypothetical protein LOC100272676 (LOC100272676) mRNA | GO:0016021; integral to membrane | GO:0016020; membrane | GO:0015450; P-P-bond-hydrolysis-driven protein transmembrane transporter ac…
GRMZM2G155525_T01	not assigned	metal ion binding protein, putative, expressed	AT5G02600.2	heavy-metal-associated domain-containing protein	72.36283866	18.497532	8.648978467	13.30480141	Uniprot/SPTREMBL:B6T8A4; Metal ion binding protein | UniGene:Zm.4874; LOC100282516 | RefSeq_peptide:NP_001148896; LOC100282516 | RefSeq_dna:NM_001155424; LOC100282516 (cl21246_1a) mRNA | GO:0046872; metal ion binding | GO:0030001; metal ion transport | GO:0015694; mercury ion transport | GO:0015097; mercury ion transmembrane transporter activity | EntrezGene:100282516; LOC100282516
GRMZM2G111713_T02	protein.targeting	tim44-like domain containing protein, expressed	AT5G27395.2	P-P-bond-hydrolysis-driven protein transmembrane transporter	9.644521904	2.728473408	0.428875048	0.7138041	GO:0015450; P-P-bond-hydrolysis-driven protein transmembrane transporter activity | GO:0006886; intracellular protein transport | GO:0005744; mitochondrial inner membrane presequence translocase complex
GRMZM2G111713_T01	protein.targeting	tim44-like domain containing protein, expressed	AT5G27395.2	P-P-bond-hydrolysis-driven protein transmembrane transporter	9.644521904	2.728473408	0.428875048	0.7138041	Uniprot/SPTREMBL:B7ZXE0; Putative uncharacterized protein | Uniprot/SPTREMBL:B4G030; Putative uncharacterized proteinTim44-like domain containing protein ; | UniGene:Zm.66773; LOC100280627 | RefSeq_peptide:NP_001147017; LOC100280627 | RefSeq_dna:NM_001153545; LOC100280627 (pco063756) mRNA | GO:0015450; P-P-bond-hydrolysis-driven protein transmembrane transporter activity | GO:0006886; intracellul…
GRMZM2G043983_T01	protein.targeting.mitochondria	mitochondrial import receptor subunit TOM40 homolog 1, putative, expressed	AT3G20000.1	TOM40; P-P-bond-hydrolysis-driven protein transmembrane transporter/ voltage-gated anion channel	16.13608865	3.321338656	1.196755028	1.980099916	Uniprot/SPTREMBL:B4FM49; Mitochondrial import receptor subunit TOM40Putative uncharacterized protein ; | UniGene:Zm.19874; Mitochondrial import receptor subunit TOM40 | RefSeq_peptide:NP_001148659; mitochondrial import receptor subunit TOM40 | RefSeq_dna:NM_001155187; mitochondrial import receptor subunit TOM40 (LOC100282275) nuclear gene encoding mitochondrial protein mRNA | GO:0055085; transmem…
GRMZM2G043983_T02	protein.targeting.mitochondria	mitochondrial import receptor subunit TOM40 homolog 1, putative, expressed	AT3G20000.1	TOM40; P-P-bond-hydrolysis-driven protein transmembrane transporter/ voltage-gated anion channel	16.13608865	3.321338656	1.196755028	1.980099916	Uniprot/SPTREMBL:B4FUG9; Putative uncharacterized protein | GO:0055085; transmembrane transport | GO:0008308; voltage-gated anion channel activity | GO:0006820; anion transport | GO:0005741; mitochondrial outer membrane
GRMZM2G174696_T01	protein.targeting.mitochondria	mitochondrial import receptor subunit TOM40 homolog 1, putative, expressed	AT3G20000.1	TOM40; P-P-bond-hydrolysis-driven protein transmembrane transporter/ voltage-gated anion channel	17.9016432	7.568101512	2.944851996	3.499370008	Uniprot/SPTREMBL:B6TEP3; Mitochondrial import receptor subunit TOM40Putative uncharacterized protein ; | UniGene:Zm.118583; LOC100283111 | RefSeq_peptide:NP_001149485; LOC100283111 | RefSeq_dna:NM_001156013; LOC100283111 (cl3204_1) nuclear gene encoding mitochondrial protein mRNA | GO:0055085; transmembrane transport | GO:0008308; voltage-gated anion channel activity | GO:0006820; anion transport…
GRMZM2G073498_T04	protein.targeting.secretory pathway.unspecified	protein transport protein Sec61 alpha subunit isoform 2, putative, expressed	AT2G34250.2	protein transport protein sec61, putative	91.24844658	29.80154261	8.60240272	8.638512036	GO:0015031; protein transport | GO:0015450; P-P-bond-hydrolysis-driven protein transmembrane transporter activity | GO:0016020; membrane
GRMZM2G073498_T01	protein.targeting.secretory pathway.unspecified	protein transport protein Sec61 alpha subunit isoform 2, putative, expressed	AT2G34250.2	protein transport protein sec61, putative	91.24844658	29.80154261	8.60240272	8.638512036	Uniprot/SPTREMBL:C4J7M6; Putative uncharacterized protein | Uniprot/SPTREMBL:B8A1R6; Putative uncharacterized protein | Uniprot/SPTREMBL:B4FL58; Putative uncharacterized protein | UniGene:Zm.77879; Hypothetical protein LOC100217058 | RefSeq_peptide:NP_001136901; hypothetical protein LOC100217058 | RefSeq_dna:NM_001143429; hypothetical protein LOC100217058 (LOC100217058) mRNA | GO:0016020; membran…
GRMZM2G073498_T02	protein.targeting.secretory pathway.unspecified	protein transport protein Sec61 alpha subunit isoform 2, putative, expressed	AT2G34250.2	protein transport protein sec61, putative	91.24844658	29.80154261	8.60240272	8.638512036	Uniprot/SPTREMBL:C4J7M6; Putative uncharacterized protein | Uniprot/SPTREMBL:B8A1R6; Putative uncharacterized protein | Uniprot/SPTREMBL:B4FL58; Putative uncharacterized protein | RefSeq_peptide:NP_001136901; hypothetical protein LOC100217058 | GO:0016020; membrane | GO:0015450; P-P-bond-hydrolysis-driven protein transmembrane transporter activity | GO:0015031; protein transport | EntrezGene:1002…
GRMZM2G073498_T03	protein.targeting.secretory pathway.unspecified	protein transport protein Sec61 alpha subunit isoform 2, putative, expressed	AT2G34250.2	protein transport protein sec61, putative	91.24844658	29.80154261	8.60240272	8.638512036	Uniprot/SPTREMBL:C4J7M6; Putative uncharacterized protein | Uniprot/SPTREMBL:B4FL58; Putative uncharacterized protein | RefSeq_peptide:NP_001136901; hypothetical protein LOC100217058 | GO:0016020; membrane | GO:0015450; P-P-bond-hydrolysis-driven protein transmembrane transporter activity | GO:0015031; protein transport | EntrezGene:100217058; hypothetical protein LOC100217058
GRMZM2G089491_T01	protein.targeting.secretory pathway.unspecified	protein transport protein SEC61 gamma subunit, putative, expressed	AT5G50460.1	protein transport protein SEC61 gamma subunit, putative	154.3641127	25.5773011	5.964115477	11.71364626	Uniprot/SPTREMBL:B6SPB6; Protein transport protein SEC61 gamma subunit | RefSeq_peptide:NP_001147308; protein transport protein SEC61 gamma subunit | RefSeq_dna:NM_001153836; protein transport protein SEC61 gamma subunit (LOC100280916) mRNA | GO:0016020; membrane | GO:0015450; P-P-bond-hydrolysis-driven protein transmembrane transporter activity | GO:0015031; protein transport | GO:0006886; intra…
GRMZM2G307252_T01	protein.targeting.secretory pathway.unspecified	protein transport protein Sec61 alpha subunit isoform 2, putative, expressed	AT2G34250.2	protein transport protein sec61, putative	66.56697785	11.75305368	4.41086919	5.696486148	Uniprot/SPTREMBL:B6TIE9; Putative uncharacterized protein | UniGene:Zm.144404; TSA: Zea mays contig55411 mRNA sequence | UniGene:Zm.141256; TSA: Zea mays contig52613 mRNA sequence | RefSeq_peptide:NP_001143980; hypothetical protein LOC100276798 | RefSeq_dna:NM_001150508; hypothetical protein LOC100276798 (LOC100276798) mRNA | GO:0016020; membrane | GO:0015450; P-P-bond-hydrolysis-driven protein t…
GRMZM2G307252_T02	protein.targeting.secretory pathway.unspecified	protein transport protein Sec61 alpha subunit isoform 2, putative, expressed	AT2G34250.2	protein transport protein sec61, putative	66.56697785	11.75305368	4.41086919	5.696486148	GO:0016020; membrane | GO:0015450; P-P-bond-hydrolysis-driven protein transmembrane transporter activity | GO:0015031; protein transport
GRMZM2G307252_T03	protein.targeting.secretory pathway.unspecified	protein transport protein Sec61 alpha subunit isoform 2, putative, expressed	AT2G34250.2	protein transport protein sec61, putative	66.56697785	11.75305368	4.41086919	5.696486148	GO:0015031; protein transport | GO:0015450; P-P-bond-hydrolysis-driven protein transmembrane transporter activity | GO:0016020; membrane
GRMZM2G363447_T01	protein.targeting.secretory pathway.unspecified	protein transport protein SEC61 gamma subunit, putative, expressed	AT5G50460.1	protein transport protein SEC61 gamma subunit, putative	35.07691165	6.11609473	1.62055883	3.214162658	Uniprot/SPTREMBL:B6STC0; Protein transport protein SEC61 gamma subunit | UniGene:Zm.97121; Protein transport protein SEC61 gamma subunit | RefSeq_peptide:NP_001150911; protein transport protein SEC61 gamma subunit | RefSeq_dna:NM_001157439; protein transport protein SEC61 gamma subunit (LOC100284544) mRNA | GO:0016020; membrane | GO:0015450; P-P-bond-hydrolysis-driven protein transmembrane transp…
GRMZM2G431703_T01	protein.targeting.secretory pathway.unspecified	protein transport protein SEC61 gamma subunit, putative, expressed	AT5G50460.1	protein transport protein SEC61 gamma subunit, putative	78.78652993	21.24291474	7.872003017	17.6896698	Uniprot/SPTREMBL:B6TB44; Protein transport protein SEC61 gamma subunit | UniGene:Zm.92288; LOC100192024 | GO:0016020; membrane | GO:0015450; P-P-bond-hydrolysis-driven protein transmembrane transporter activity | GO:0015031; protein transport | GO:0006886; intracellular protein transport | GO:0006605; protein targeting
GRMZM2G431703_T02	protein.targeting.secretory pathway.unspecified	protein transport protein SEC61 gamma subunit, putative, expressed	AT5G50460.1	protein transport protein SEC61 gamma subunit, putative	78.78652993	21.24291474	7.872003017	17.6896698	Uniprot/SPTREMBL:B6TB44; Protein transport protein SEC61 gamma subunit | GO:0016020; membrane | GO:0015450; P-P-bond-hydrolysis-driven protein transmembrane transporter activity | GO:0015031; protein transport | GO:0006886; intracellular protein transport | GO:0006605; protein targeting
GRMZM2G091648_T01	PS.lightreaction.ATP synthase	NA	0	NA	8.283351784	1.490066556	0	0	GO:0015078; hydrogen ion transmembrane transporter activity | GO:0015986; ATP synthesis coupled proton transport | GO:0033179; proton-transporting V-type ATPase V0 domain
GRMZM2G136072_T01	PS.photorespiration.hydroxypyruvate reductase	glyoxylate reductase, putative	AT2G45630.2	oxidoreductase family protein	5.737075442	1.699349062	0.866918268	0.937863792	Uniprot/SPTREMBL:B6SLR7; Glyoxylate reductase | UniGene:Zm.33788; Glyoxylate reductase | RefSeq_peptide:NP_001147169; glyoxylate reductase | RefSeq_dna:NM_001153697; glyoxylate reductase (LOC100280775) mRNA | GO:0051287; NAD or NADH binding | GO:0048037; cofactor binding | GO:0016616; oxidoreductase activity acting on the CH-OH group of donors NAD or NADP as acceptor | GO:0008324; cation transmem…
GRMZM2G004748_T01	transport.ABC transporters and multidrug resistance systems	multidrug resistance protein 2, putative, expressed	AT1G10680.1	PGP10 (P-GLYCOPROTEIN 10); ATPase, coupled to transmembrane movement of substances	45.65931799	3.074675159	0.166914299	0.35211925	GO:0055085; transmembrane transport | RefSeq_dna:NM_001137368; hypothetical protein LOC100191944 (LOC100191944) mRNA | RefSeq_peptide:NP_001130840; hypothetical protein LOC100191944 | UniGene:Zm.101271; Transcribed locus weakly similar to NP_001042789.1 Os01g0290700 [Oryza sativa Japonica Group] | UniGene:Zm.915; Hypothetical protein LOC100191944 | Uniprot/SPTREMBL:B4FAR5; Putative uncharacterize…
GRMZM2G004748_T02	transport.ABC transporters and multidrug resistance systems	multidrug resistance protein 2, putative, expressed	AT1G10680.1	PGP10 (P-GLYCOPROTEIN 10); ATPase, coupled to transmembrane movement of substances	45.65931799	3.074675159	0.166914299	0.35211925	GO:0055085; transmembrane transport | GO:0042626; ATPase activity coupled to transmembrane movement of substances | GO:0016021; integral to membrane | GO:0006810; transport | GO:0005524; ATP binding
GRMZM2G075594_T01	transport.ABC transporters and multidrug resistance systems	major facilitator superfamily antiporter, putative	AT3G43790.1	ZIFL2 (ZINC INDUCED FACILITATOR-like 2); carbohydrate transmembrane transporter/ sugar:hydrogen symporter	34.18618657	14.32514597	0.805454222	0	Uniprot/SPTREMBL:C0PPA4; Putative uncharacterized protein | Uniprot/SPTREMBL:B8A1V4; Putative uncharacterized protein | Uniprot/SPTREMBL:B6TZM4; Major facilitator superfamily antiporter | UniGene:Zm.137517; Transcribed locus strongly similar to NP_001146500.1 hypothetical protein LOC100280090 [Zea mays] | RefSeq_peptide:NP_001146500; hypothetical protein LOC100280090 | GO:0055085; transmembrane t…
GRMZM2G075594_T02	transport.ABC transporters and multidrug resistance systems	major facilitator superfamily antiporter, putative	AT3G43790.1	ZIFL2 (ZINC INDUCED FACILITATOR-like 2); carbohydrate transmembrane transporter/ sugar:hydrogen symporter	34.18618657	14.32514597	0.805454222	0	Uniprot/SPTREMBL:B8A1V4; Putative uncharacterized protein | UniGene:Zm.137517; Transcribed locus strongly similar to NP_001146500.1 hypothetical protein LOC100280090 [Zea mays] | RefSeq_peptide:NP_001146500; hypothetical protein LOC100280090 | GO:0055085; transmembrane transport | EntrezGene:100280090; hypothetical protein LOC100280090
GRMZM2G075594_T04	transport.ABC transporters and multidrug resistance systems	major facilitator superfamily antiporter, putative	AT3G43790.1	ZIFL2 (ZINC INDUCED FACILITATOR-like 2); carbohydrate transmembrane transporter/ sugar:hydrogen symporter	34.18618657	14.32514597	0.805454222	0	GO:0055085; transmembrane transport | GO:0046677; response to antibiotic | GO:0016021; integral to membrane | GO:0015904; tetracycline transport | GO:0015520; tetracycline:hydrogen antiporter activity
GRMZM2G075594_T05	transport.ABC transporters and multidrug resistance systems	major facilitator superfamily antiporter, putative	AT3G43790.1	ZIFL2 (ZINC INDUCED FACILITATOR-like 2); carbohydrate transmembrane transporter/ sugar:hydrogen symporter	34.18618657	14.32514597	0.805454222	0	GO:0055085; transmembrane transport
GRMZM2G085236_T01	transport.ABC transporters and multidrug resistance systems	multidrug resistance protein 11, putative, expressed	AT3G28860.1	ABCB19; ATPase, coupled to transmembrane movement of substances / auxin efflux transmembrane transporter	18.51360316	1.549617247	0.216283714	0.492474754	GO:0019001; guanyl nucleotide binding | GO:0042626; ATPase activity coupled to transmembrane movement of substances | GO:0055085; transmembrane transport | UniGene:Zm.138662; Transcribed locus strongly similar to XP_002448624.1 hypothetical protein SORBIDRAFT_06g030350 [Sorghum bicolor] | UniGene:Zm.2959; Full-length cDNA clone ZM_BFb0231P04 | UniGene:Zm.37669; Transcribed locus strongly similar …
GRMZM2G085236_T02	transport.ABC transporters and multidrug resistance systems	multidrug resistance protein 11, putative, expressed	AT3G28860.1	ABCB19; ATPase, coupled to transmembrane movement of substances / auxin efflux transmembrane transporter	18.51360316	1.549617247	0.216283714	0.492474754	UniGene:Zm.138662; Transcribed locus strongly similar to XP_002448624.1 hypothetical protein SORBIDRAFT_06g030350 [Sorghum bicolor] | GO:0055085; transmembrane transport | GO:0042626; ATPase activity coupled to transmembrane movement of substances | GO:0019001; guanyl nucleotide binding | GO:0017111; nucleoside-triphosphatase activity | GO:0016887; ATPase activity | GO:0016021; integral to membra…
GRMZM2G085236_T03	transport.ABC transporters and multidrug resistance systems	multidrug resistance protein 11, putative, expressed	AT3G28860.1	ABCB19; ATPase, coupled to transmembrane movement of substances / auxin efflux transmembrane transporter	18.51360316	1.549617247	0.216283714	0.492474754	UniGene:Zm.138662; Transcribed locus strongly similar to XP_002448624.1 hypothetical protein SORBIDRAFT_06g030350 [Sorghum bicolor] | GO:0055085; transmembrane transport | GO:0042626; ATPase activity coupled to transmembrane movement of substances | GO:0017111; nucleoside-triphosphatase activity | GO:0016887; ATPase activity | GO:0016021; integral to membrane | GO:0006810; transport | GO:0005524;…
GRMZM2G123973_T01	transport.ABC transporters and multidrug resistance systems	antiporter/ drug transporter/ transporter, putative, expressed	AT4G23030.1	MATE efflux protein-related	5.077092029	0.634504823	0.034097309	0	Uniprot/SPTREMBL:C0P4P2; Putative uncharacterized protein | UniGene:Zm.78129; Hypothetical protein LOC100382128 | RefSeq_peptide:NP_001168360; hypothetical protein LOC100382128 | RefSeq_dna:NM_001174889; hypothetical protein LOC100382128 (LOC100382128) mRNA | GO:0055085; transmembrane transport | GO:0016020; membrane | GO:0015297; antiporter activity | GO:0015238; drug transmembrane transporter a…
GRMZM2G143400_T01	transport.ABC transporters and multidrug resistance systems	antiporter/ drug transporter/ transporter, putative, expressed	AT4G23030.1	MATE efflux protein-related	3.402041107	2.831341472	0.490333333	0	GO:0055085; transmembrane transport | GO:0016020; membrane | GO:0015297; antiporter activity | GO:0015238; drug transmembrane transporter activity | GO:0009401; phosphoenolpyruvate-dependent sugar phosphotransferase system | GO:0006855; drug transmembrane transport | GO:0005351; sugar:hydrogen symporter activity
GRMZM2G423884_T01	transport.ABC transporters and multidrug resistance systems	antiporter/ drug transporter/ transporter, putative, expressed	AT4G29140.1	MATE efflux protein-related	2.553699307	0.169616151	0.037599004	0.213548861	GO:0006855; drug transmembrane transport | UniGene:Zm.39601; Transcribed locus moderately similar to XP_002438571.1 hypothetical protein SORBIDRAFT_10g022080 [Sorghum bicolor] | GO:0055085; transmembrane transport | GO:0016020; membrane | GO:0015297; antiporter activity | GO:0015238; drug transmembrane transporter activity
GRMZM2G078292_T01	transport.amino acids	cationic amino acid transporter, putative, expressed	AT1G31830.2	amino acid permease family protein	17.98140064	10.4663016	6.80658326	7.280499232	Uniprot/SPTREMBL:C0P3V5; Putative uncharacterized protein | Uniprot/SPTREMBL:B6U8S8; Putative uncharacterized protein | UniGene:Zm.16278; LOC100193038 | GO:0055085; transmembrane transport | GO:0016020; membrane | GO:0015171; amino acid transmembrane transporter activity | GO:0006865; amino acid transport | GO:0006810; transport
GRMZM2G014914_T02	transport.Major Intrinsic Proteins.PIP	aquaporin PIP2.1, putative, expressed	AT3G53420.2	PIP2A (PLASMA MEMBRANE INTRINSIC PROTEIN 2A); water channel	863.1961783	222.7150455	133.0945044	270.8236443	GO:0055085; transmembrane transport | GO:0016021; integral to membrane | GO:0016020; membrane | GO:0008483; transaminase activity | GO:0006810; transport | GO:0006520; cellular amino acid metabolic process | GO:0005215; transporter activity
GRMZM2G014914_T01	transport.Major Intrinsic Proteins.PIP	aquaporin PIP2.1, putative, expressed	AT3G53420.2	PIP2A (PLASMA MEMBRANE INTRINSIC PROTEIN 2A); water channel	863.1961783	222.7150455	133.0945044	270.8236443	MaizeGDB_GenBank:AY243801; product:aquaporin | RefSeq_dna:NM_001111554; plasma membrane integral protein ZmPIP2-1 (PIP2-1) mRNA | RefSeq_peptide:NP_001105024; aquaporin PIP2-1 | UniGene:Zm.96175; Transcribed locus strongly similar to NP_001105024.1 aquaporin PIP2-1 [Zea mays] | Uniprot/SPTREMBL:B4FA22; Aquaporin PIP2.1Putative uncharacterized protein ; | Uniprot/SPTREMBL:B6T634; Aquaporin PIP2.1 …
GRMZM2G018649_T01	transport.Major Intrinsic Proteins.PIP	aquaporin PIP2.4, putative, expressed	AT2G37170.1	PIP2B (PLASMA MEMBRANE INTRINSIC PROTEIN 2); water channel	49.9338202	20.48042337	19.13954029	31.78560038	GO:0055085; transmembrane transport | GO:0016021; integral to membrane | GO:0016020; membrane | GO:0006810; transport | GO:0005215; transporter activity
GRMZM2G081192_T01	transport.Major Intrinsic Proteins.PIP	aquaporin PIP2.2, putative, expressed	AT2G37170.1	PIP2B (PLASMA MEMBRANE INTRINSIC PROTEIN 2); water channel	99.4106108	97.24696989	32.2351238	64.37030408	Uniprot/SWISSPROT:Q9ATM7; Aquaporin PIP2-3 (Plasma membrane intrinsic protein 2-3)(ZmPIP2-3)(ZmPIP2;3) | Uniprot/SPTREMBL:C4JAU6; Putative uncharacterized protein | RefSeq_peptide:NP_001105025; aquaporin PIP2-3 | RefSeq_dna:NM_001111555; plasma membrane intrinsic protein2 (pip2c) mRNA | MaizeGDB_GenBank:AF326493; product:plasma membrane integral protein ZmPIP2-3 | GO:0055085; transmembrane transp…
GRMZM2G174807_T01	transport.Major Intrinsic Proteins.PIP	aquaporin PIP1.1, putative, expressed	AT4G23400.1	PIP1;5 (PLASMA MEMBRANE INTRINSIC PROTEIN 1;5); water channel	1373.240018	624.1622028	551.390284	696.9543872	RefSeq_dna:NM_001111996; transmembrane protein (inra1(tmp)) mRNA | RefSeq_peptide:NP_001105466; aquaporin PIP1-1 | UniGene:Zm.181; Transmembrane protein | Uniprot/SPTREMBL:B6TC46; Aquaporin PIP1.1 | Uniprot/SPTREMBL:Q84RL8; Plasma membrane intrinsic proteinPutative uncharacterized protein ; | Uniprot/SWISSPROT:Q41870; Aquaporin PIP1-1 (Plasma membrane intrinsic protein 1-1)(ZmPIP1-1)(ZmPIP1;1)(Zm…
GRMZM2G174807_T02	transport.Major Intrinsic Proteins.PIP	aquaporin PIP1.1, putative, expressed	AT4G23400.1	PIP1;5 (PLASMA MEMBRANE INTRINSIC PROTEIN 1;5); water channel	1373.240018	624.1622028	551.390284	696.9543872	Uniprot/SPTREMBL:C4JBG0; Putative uncharacterized protein | GO:0045263; proton-transporting ATP synthase complex coupling factor F(o) | GO:0016020; membrane | GO:0015986; ATP synthesis coupled proton transport | GO:0015078; hydrogen ion transmembrane transporter activity | GO:0006810; transport | GO:0005215; transporter activity
GRMZM2G392975_T03	transport.Major Intrinsic Proteins.PIP	aquaporin PIP1.1, putative, expressed	AT4G23400.1	PIP1;5 (PLASMA MEMBRANE INTRINSIC PROTEIN 1;5); water channel	320.3078778	208.3986988	120.4038584	143.3139713	GO:0055085; transmembrane transport | GO:0016021; integral to membrane | GO:0016020; membrane | GO:0006810; transport | GO:0005215; transporter activity
GRMZM2G392975_T01	transport.Major Intrinsic Proteins.PIP	aquaporin PIP1.1, putative, expressed	AT4G23400.1	PIP1;5 (PLASMA MEMBRANE INTRINSIC PROTEIN 1;5); water channel	320.3078778	208.3986988	120.4038584	143.3139713	Uniprot/SWISSPROT:Q9AQU5; Aquaporin PIP1-3/PIP1-4 (Plasma membrane intrinsic protein 1-3)(ZmPIP1-3)(ZmPIP1;3)(Plasma membrane intrinsic protein 1-4)(ZmPIP1-4)(ZmPIP1;4) | Uniprot/SPTREMBL:B6TRG6; Aquaporin PIP1.1 | Uniprot/SPTREMBL:B4FUM4; Putative uncharacterized protein | RefSeq_peptide:NP_001105022; aquaporin PIP1-3/PIP1-4 | RefSeq_dna:NM_001111552; plasma membrane integral protein ZmPIP1-3 (P…
GRMZM2G392975_T02	transport.Major Intrinsic Proteins.PIP	aquaporin PIP1.1, putative, expressed	AT4G23400.1	PIP1;5 (PLASMA MEMBRANE INTRINSIC PROTEIN 1;5); water channel	320.3078778	208.3986988	120.4038584	143.3139713	Uniprot/SWISSPROT:Q9AQU5; Aquaporin PIP1-3/PIP1-4 (Plasma membrane intrinsic protein 1-3)(ZmPIP1-3)(ZmPIP1;3)(Plasma membrane intrinsic protein 1-4)(ZmPIP1-4)(ZmPIP1;4) | Uniprot/SPTREMBL:B6TRG6; Aquaporin PIP1.1 | Uniprot/SPTREMBL:B4FUM4; Putative uncharacterized protein | RefSeq_peptide:NP_001105022; aquaporin PIP1-3/PIP1-4 | RefSeq_dna:NM_001111552; plasma membrane integral protein ZmPIP1-3 (P…
GRMZM2G432926_T01	transport.Major Intrinsic Proteins.PIP	aquaporin PIP2.1, putative, expressed	AT5G60660.1	PIP2;4 (PLASMA MEMBRANE INTRINSIC PROTEIN 2;4); water channel	48.73887921	6.9870295	5.513012099	6.715760849	UniGene:Zm.13608; Transcribed locus moderately similar to NP_001077441.1 PIP1C (PLASMA MEMBRANE INTRINSIC PROTEIN 1C); water channel [Arabidopsis thaliana] | UniGene:Zm.101218; Full-length cDNA clone ZM_BFb0203K02 | GO:0055085; transmembrane transport | GO:0016021; integral to membrane | GO:0016020; membrane | GO:0006810; transport | GO:0005215; transporter activity
GRMZM2G093090_T01	transport.Major Intrinsic Proteins.TIP	aquaporin TIP4.1, putative, expressed	AT2G25810.1	TIP4;1 (tonoplast intrinsic protein 4;1); water channel	10.02318623	0.695458285	0.03425845	0	Uniprot/SWISSPROT:Q9ATL3; Aquaporin TIP4-4 (Tonoplast intrinsic protein 4-4)(ZmTIP4-4)(ZmTIP4;4) | Uniprot/SPTREMBL:B6TR46; Aquaporin TIP4.1 | Uniprot/SPTREMBL:B4FQJ8; Putative uncharacterized protein | UniGene:Zm.85735; Tonoplast intrinsic protein4 | RefSeq_peptide:NP_001105641; aquaporin TIP4-4 | RefSeq_dna:NM_001112171; tonoplast intrinsic protein4 (tip4d) mRNA | GO:0055085; transmembrane tran…
GRMZM2G103983_T01	transport.Major Intrinsic Proteins.TIP	aquaporin TIP3.1, putative, expressed	AT1G17810.1	BETA-TIP (BETA-TONOPLAST INTRINSIC PROTEIN); water channel	15.56035837	0.915430495	0.686821429	1.139873214	Uniprot/SWISSPROT:Q9AT75; Aquaporin TIP3-2 (Tonoplast intrinsic protein 3-2)(ZmTIP3-2)(ZmTIP3;2) | Uniprot/SPTREMBL:B6SGY3; Aquaporin TIP3.1 | UniGene:Zm.622; Tonoplast intrinsic protein3 | RefSeq_peptide:NP_001105045; aquaporin TIP3-2 | RefSeq_dna:NM_001111575; tonoplast intrinsic protein3 (tip3b) mRNA | GO:0055085; transmembrane transport | GO:0016021; integral to membrane | GO:0016020; membran…
GRMZM2G121275_T01	transport.Major Intrinsic Proteins.TIP	aquaporin TIP2.1, putative, expressed	AT5G47450.1	AtTIP2;3; ammonia transporter/ methylammonium transmembrane transporter/ water channel	30.19798129	3.406457709	3.135750206	4.302388119	GO:0055085; transmembrane transport | GO:0019861; flagellum | GO:0016021; integral to membrane | GO:0016020; membrane | GO:0006810; transport | GO:0005215; transporter activity
GRMZM2G125023_T01	transport.Major Intrinsic Proteins.TIP	aquaporin TIP2.1, putative, expressed	AT4G17340.1	TIP2;2 (TONOPLAST INTRINSIC PROTEIN 2;2); water channel	16.41429406	1.501289146	0.660279539	0.912981564	MaizeGDB_GenBank:AY106931; | RefSeq_dna:NM_001111437; porin2 (por2) mRNA | RefSeq_dna:NM_001111566; tonoplast intrinsic protein5 (tip5) mRNA | RefSeq_peptide:NP_001104907; aquaporin TIP2-3 | RefSeq_peptide:NP_001105036; aquaporin TIP5-1 | UniGene:Zm.621; Tonoplast intrinsic protein5 | Uniprot/SPTREMBL:B6U3T7; Aquaporin TIP2.1 | Uniprot/SPTREMBL:C0P4C5; Putative uncharacterized protein | Uniprot/S…
GRMZM2G022793_T01	transport.metabolite transporters at the envelope membrane	phosphate/phosphoenolpyruvate translocator, putative, expressed	AT3G14410.1	transporter-related	12.95364182	8.626663064	3.945455716	4.280227374	GO:0055085; transmembrane transport | UniGene:Zm.77978; TSA: Zea mays contig16448 mRNA sequence
GRMZM2G015401_T01	transport.metabolite transporters at the mitochondrial membrane	phosphate carrier protein, mitochondrial precursor, putative, expressed	AT5G14040.1	mitochondrial phosphate transporter	108.7341816	51.16960139	37.75387516	50.25299408	Uniprot/SPTREMBL:B4FTJ6; Putative uncharacterized protein | UniGene:Zm.198; Mitochondrial phosphate transporter | GO:0055085; transmembrane transport | GO:0016020; membrane | GO:0006810; transport | GO:0005743; mitochondrial inner membrane | GO:0005488; binding | GO:0005215; transporter activity
GRMZM2G024823_T01	transport.metabolite transporters at the mitochondrial membrane	mitochondrial carnitine/acylcarnitine carrier-like protein, putative, expressed	AT5G46800.1	BOU (A BOUT DE SOUFFLE); binding / transporter	43.44500607	23.49631165	15.77160362	24.06002776	Uniprot/SPTREMBL:B4FEA2; Putative uncharacterized protein | RefSeq_peptide:NP_001141073; hypothetical protein LOC100273155 | GO:0055085; transmembrane transport | GO:0016020; membrane | GO:0006839; mitochondrial transport | GO:0006810; transport | GO:0005743; mitochondrial inner membrane | GO:0005739; mitochondrion | GO:0005488; binding | GO:0005215; transporter activity | EntrezGene:100273155; h…
GRMZM2G024823_T02	transport.metabolite transporters at the mitochondrial membrane	mitochondrial carnitine/acylcarnitine carrier-like protein, putative, expressed	AT5G46800.1	BOU (A BOUT DE SOUFFLE); binding / transporter	43.44500607	23.49631165	15.77160362	24.06002776	GO:0006839; mitochondrial transport | GO:0016020; membrane | GO:0055085; transmembrane transport | RefSeq_peptide:NP_001141073; hypothetical protein LOC100273155 | Uniprot/SPTREMBL:B4FEA2; Putative uncharacterized protein | GO:0006810; transport | GO:0005743; mitochondrial inner membrane | GO:0005739; mitochondrion | GO:0005488; binding | GO:0005215; transporter activity | EntrezGene:100273155; h…
GRMZM2G024823_T03	transport.metabolite transporters at the mitochondrial membrane	mitochondrial carnitine/acylcarnitine carrier-like protein, putative, expressed	AT5G46800.1	BOU (A BOUT DE SOUFFLE); binding / transporter	43.44500607	23.49631165	15.77160362	24.06002776	GO:0016020; membrane | GO:0055085; transmembrane transport | RefSeq_dna:NM_001147601; hypothetical protein LOC100273155 (LOC100273155) mRNA | RefSeq_peptide:NP_001141073; hypothetical protein LOC100273155 | UniGene:Zm.94025; Hypothetical protein LOC100273155 | Uniprot/SPTREMBL:B4FEA2; Putative uncharacterized protein | GO:0006839; mitochondrial transport | GO:0006810; transport | GO:0005743; mito…
GRMZM2G061428_T01	transport.metabolite transporters at the mitochondrial membrane	protein brittle-1, chloroplast precursor, putative, expressed	AT5G64970.1	mitochondrial substrate carrier family protein	5.954396893	4.750644783	2.333941426	2.99950955	UniGene:Zm.119315; Clone 456515 mRNA sequence | GO:0055085; transmembrane transport | GO:0016020; membrane | GO:0006810; transport | GO:0005743; mitochondrial inner membrane | GO:0005488; binding
GRMZM2G067877_T01	transport.metabolite transporters at the mitochondrial membrane	Grave disease carrier protein, putative, expressed	AT4G01100.1	ADNT1 (ADENINE NUCLEOTIDE TRANSPORTER 1); ADP transmembrane transporter/ AMP transmembrane transporter/ ATP transmembrane transporter/ binding	58.91676072	23.36156259	16.28684866	18.98386373	GO:0055085; transmembrane transport | RefSeq_dna:NM_001136736; hypothetical protein LOC100191302 (LOC100191302) mRNA | RefSeq_peptide:NP_001130208; hypothetical protein LOC100191302 | UniGene:Zm.49233; Transcribed locus | Uniprot/SPTREMBL:B4F8B5; Grave disease carrier proteinPutative uncharacterized protein ; | GO:0016020; membrane | GO:0006839; mitochondrial transport | GO:0006810; transport | G…
GRMZM2G067877_T02	transport.metabolite transporters at the mitochondrial membrane	Grave disease carrier protein, putative, expressed	AT4G01100.1	ADNT1 (ADENINE NUCLEOTIDE TRANSPORTER 1); ADP transmembrane transporter/ AMP transmembrane transporter/ ATP transmembrane transporter/ binding	58.91676072	23.36156259	16.28684866	18.98386373	GO:0055085; transmembrane transport | MaizeGDB_GenBank:AY108334; | RefSeq_peptide:NP_001130208; hypothetical protein LOC100191302 | UniGene:Zm.84655; Hypothetical protein LOC100191302 | Uniprot/SPTREMBL:B4F8B5; Grave disease carrier proteinPutative uncharacterized protein ; | GO:0016020; membrane | GO:0006839; mitochondrial transport | GO:0006810; transport | GO:0005743; mitochondrial inner membr…
GRMZM2G080243_T01	transport.metabolite transporters at the mitochondrial membrane	protein brittle-1, chloroplast precursor, putative, expressed	AT3G20240.1	mitochondrial substrate carrier family protein	6.570918426	1.786994208	1.039828196	1.205275775	UniGene:Zm.24452; Protein brittle-1 | RefSeq_peptide:NP_001151333; protein brittle-1 | RefSeq_dna:NM_001157861; protein brittle-1 (LOC100284966) mRNA | GO:0055085; transmembrane transport | GO:0016020; membrane | GO:0006810; transport | GO:0005743; mitochondrial inner membrane | GO:0005488; binding
GRMZM2G105571_T01	transport.metabolite transporters at the mitochondrial membrane	ADP,ATP carrier protein, mitochondrial precursor, putative, expressed	AT4G28390.1	AAC3 (ADP/ATP CARRIER 3); ATP:ADP antiporter/ binding	251.0723264	152.3744588	41.42335998	59.56585811	RefSeq_dna:NM_001157200; ADPATP carrier protein (LOC100284305) mRNA | RefSeq_peptide:NP_001150672; ADPATP carrier protein | UniGene:Zm.155691; TSA: Zea mays contig36784 mRNA sequence | UniGene:Zm.93696; ADPATP carrier protein | Uniprot/SPTREMBL:B4FSA7; ADPATP carrier proteinPutative uncharacterized protein ; | GO:0055085; transmembrane transport | GO:0016020; membrane | EntrezGene:100284305; ADPA…
GRMZM2G105571_T02	transport.metabolite transporters at the mitochondrial membrane	ADP,ATP carrier protein, mitochondrial precursor, putative, expressed	AT4G28390.1	AAC3 (ADP/ATP CARRIER 3); ATP:ADP antiporter/ binding	251.0723264	152.3744588	41.42335998	59.56585811	Uniprot/SPTREMBL:B4FSA7; ADPATP carrier proteinPutative uncharacterized protein ; | RefSeq_peptide:NP_001150672; ADPATP carrier protein | GO:0055085; transmembrane transport | GO:0016020; membrane | GO:0006810; transport | GO:0005743; mitochondrial inner membrane | GO:0005488; binding | GO:0005215; transporter activity | EntrezGene:100284305; ADPATP carrier protein
GRMZM2G111017_T01	transport.metabolite transporters at the mitochondrial membrane	ADP/ATP translocase 2, putative, expressed	AT5G56450.1	mitochondrial substrate carrier family protein	8.097409155	3.81670769	1.863770933	2.825466513	GO:0055085; transmembrane transport | GO:0016020; membrane | GO:0006810; transport | GO:0005743; mitochondrial inner membrane | GO:0005488; binding | GO:0005215; transporter activity
GRMZM2G127173_T01	transport.metabolite transporters at the mitochondrial membrane	mitochondrial uncoupling protein 4, putative, expressed	AT1G14140.1	mitochondrial substrate carrier family protein	8.941075181	7.021310478	2.530073849	3.106176858	GO:0055085; transmembrane transport | GO:0016020; membrane | GO:0006839; mitochondrial transport | GO:0006810; transport | GO:0005743; mitochondrial inner membrane | GO:0005739; mitochondrion | GO:0005488; binding | GO:0005215; transporter activity
GRMZM2G149211_T01	transport.metabolite transporters at the mitochondrial membrane	peroxisomal carrier protein, putative, expressed	AT3G05290.1	PNC1 (PEROXISOMAL ADENINE NUCLEOTIDE CARRIER 1); ADP transmembrane transporter/ ATP transmembrane transporter/ binding	15.12604292	10.99206208	5.203486398	5.717907329	Uniprot/SPTREMBL:B6T9S9; Peroxisomal carrier protein | Uniprot/SPTREMBL:B4FBM4; Putative uncharacterized protein | UniGene:Zm.85203; Peroxisomal carrier protein | RefSeq_peptide:NP_001149024; peroxisomal carrier protein | RefSeq_dna:NM_001155552; peroxisomal carrier protein (LOC100282644) mRNA | GO:0055085; transmembrane transport | GO:0016020; membrane | GO:0006810; transport | GO:0005743; mitoc…
GRMZM2G149211_T02	transport.metabolite transporters at the mitochondrial membrane	peroxisomal carrier protein, putative, expressed	AT3G05290.1	PNC1 (PEROXISOMAL ADENINE NUCLEOTIDE CARRIER 1); ADP transmembrane transporter/ ATP transmembrane transporter/ binding	15.12604292	10.99206208	5.203486398	5.717907329	GO:0055085; transmembrane transport | GO:0016020; membrane | GO:0006810; transport | GO:0005743; mitochondrial inner membrane | GO:0005488; binding
GRMZM2G149480_T01	transport.metabolite transporters at the mitochondrial membrane	protein brittle-1, chloroplast precursor, putative, expressed	AT3G20240.1	mitochondrial substrate carrier family protein	13.31760614	9.264291527	3.736752428	5.06750878	UniGene:Zm.155870; Transcribed locus strongly similar to XP_002445859.1 hypothetical protein SORBIDRAFT_07g027010 [Sorghum bicolor] | GO:0055085; transmembrane transport | GO:0016020; membrane | GO:0006810; transport | GO:0005743; mitochondrial inner membrane | GO:0005488; binding | GO:0005215; transporter activity
GRMZM2G149480_T02	transport.metabolite transporters at the mitochondrial membrane	protein brittle-1, chloroplast precursor, putative, expressed	AT3G20240.1	mitochondrial substrate carrier family protein	13.31760614	9.264291527	3.736752428	5.06750878	UniGene:Zm.155870; Transcribed locus strongly similar to XP_002445859.1 hypothetical protein SORBIDRAFT_07g027010 [Sorghum bicolor] | GO:0055085; transmembrane transport | GO:0016020; membrane | GO:0006810; transport | GO:0005743; mitochondrial inner membrane | GO:0005488; binding
GRMZM2G151893_T01	transport.metabolite transporters at the mitochondrial membrane	protein brittle-1, chloroplast precursor, putative, expressed	AT3G53940.1	mitochondrial substrate carrier family protein	5.890527599	3.157551613	1.607965761	3.008408595	GO:0055085; transmembrane transport | RefSeq_peptide:NP_001132148; hypothetical protein LOC100193567 | UniGene:Zm.108892; Transcribed locus | Uniprot/SPTREMBL:B4FFH6; Putative uncharacterized protein | Uniprot/SPTREMBL:B4FRA0; Putative uncharacterized protein | GO:0016020; membrane | GO:0006839; mitochondrial transport | GO:0006810; transport | EntrezGene:100193567; LOC100193567 | GO:0005215; tra…
GRMZM2G151893_T02	transport.metabolite transporters at the mitochondrial membrane	protein brittle-1, chloroplast precursor, putative, expressed	AT3G53940.1	mitochondrial substrate carrier family protein	5.890527599	3.157551613	1.607965761	3.008408595	Uniprot/SPTREMBL:B4FFH6; Putative uncharacterized protein | UniGene:Zm.29532; LOC100193567 | RefSeq_peptide:NP_001132148; hypothetical protein LOC100193567 | RefSeq_dna:NM_001138676; LOC100193567 (si606070a01a) mRNA | GO:0055085; transmembrane transport | GO:0016020; membrane | GO:0006810; transport | GO:0005743; mitochondrial inner membrane | GO:0005488; binding | GO:0005215; transporter activit…
GRMZM2G152827_T01	transport.metabolite transporters at the mitochondrial membrane	phosphate carrier protein, mitochondrial precursor, putative, expressed	AT5G14040.1	mitochondrial phosphate transporter	120.3064234	59.7582944	43.02821236	54.87968892	Uniprot/SPTREMBL:O80413; Mitochondrial phosphate transporter | RefSeq_peptide:NP_001104842; mitochondrial phosphate transporter | RefSeq_dna:NM_001111372; mitochondrial phosphate transporter (LOC541617) nuclear gene encoding mitochondrial protein mRNA | MaizeGDB_GenBank:AB016064; product:mitochondrial phosphate transporter | GO:0055085; transmembrane transport | GO:0016020; membrane | GO:0006810;…
GRMZM2G339503_T01	transport.metabolite transporters at the mitochondrial membrane	mitochondrial import receptor subunit TOM7-1, putative, expressed	AT5G41685.1	mitochondrial import receptor subunit TOM7 / translocase of outer membrane 7 kDa subunit (TOM7.1)	177.2144651	31.76092943	11.73413524	29.45104364	Uniprot/SPTREMBL:B6SJR3; Mitochondrial import receptor subunit TOM7-1Putative uncharacterized protein ; | UniGene:Zm.139481; TSA: Zea mays contig38822 mRNA sequence | RefSeq_peptide:NP_001150221; mitochondrial import receptor subunit TOM7-1 | RefSeq_dna:NM_001156749; mitochondrial import receptor subunit TOM7-1 (LOC100283851) nuclear gene encoding mitochondrial protein mRNA | GO:0015450; P-P-bond…
GRMZM2G436593_T01	transport.metabolite transporters at the mitochondrial membrane	mitochondrial 2-oxoglutarate/malate carrier protein, putative, expressed	AT2G22500.1	UCP5 (UNCOUPLING PROTEIN 5); binding	66.12912098	30.12547327	15.93701012	24.09733424	Uniprot/SPTREMBL:B6TRY7; Mitochondrial 2-oxoglutarate/malate carrier protein | RefSeq_peptide:NP_001150641; mitochondrial 2-oxoglutarate/malate carrier protein | GO:0055085; transmembrane transport | GO:0016020; membrane | GO:0006839; mitochondrial transport | GO:0006810; transport | GO:0005743; mitochondrial inner membrane | GO:0005739; mitochondrion | GO:0005488; binding | GO:0005215; transport…
GRMZM2G050089_T01	transport.misc	auxin hydrogen symporter, putative, expressed	AT5G01990.1	auxin efflux carrier family protein	24.89507739	13.99034351	2.89347886	3.796286026	GO:0016021; integral to membrane | GO:0055085; transmembrane transport | UniGene:Zm.138567; TSA: Zea mays contig39255 mRNA sequence
GRMZM2G050089_T02	transport.misc	auxin hydrogen symporter, putative, expressed	AT5G01990.1	auxin efflux carrier family protein	24.89507739	13.99034351	2.89347886	3.796286026	UniGene:Zm.138567; TSA: Zea mays contig39255 mRNA sequence | GO:0055085; transmembrane transport | GO:0016021; integral to membrane
GRMZM2G079127_T01	transport.misc	transparent testa 12 protein, putative, expressed	AT1G33110.1	MATE efflux family protein	65.62194855	25.11278623	20.72199457	22.85913551	RefSeq_dna:NM_001147579; hypothetical protein LOC100273132 (LOC100273132) mRNA | RefSeq_peptide:NP_001141051; hypothetical protein LOC100273132 | UniGene:Zm.98738; Hypothetical protein LOC100273132 | Uniprot/SPTREMBL:B4FT42; Putative uncharacterized protein | GO:0055085; transmembrane transport | GO:0016020; membrane | GO:0015297; antiporter activity | GO:0015238; drug transmembrane transporter a…
GRMZM2G080387_T01	transport.misc	permease, putative, expressed	AT2G34190.1	xanthine/uracil permease family protein	3.843580023	1.590804508	1.196219141	2.45072741	GO:0055085; transmembrane transport | GO:0016020; membrane | GO:0006810; transport | GO:0005215; transporter activity
GRMZM2G437859_T02	transport.misc	solute carrier family 23 member 2, putative, expressed	AT2G34190.1	xanthine/uracil permease family protein	51.47864207	1.270415672	0.124241682	0.188172854	GO:0055085; transmembrane transport | GO:0016020; membrane | GO:0006810; transport | GO:0005215; transporter activity
GRMZM2G437859_T03	transport.misc	solute carrier family 23 member 2, putative, expressed	AT2G34190.1	xanthine/uracil permease family protein	51.47864207	1.270415672	0.124241682	0.188172854	GO:0055085; transmembrane transport | GO:0016020; membrane | GO:0006810; transport | GO:0005215; transporter activity
GRMZM2G437859_T05	transport.misc	solute carrier family 23 member 2, putative, expressed	AT2G34190.1	xanthine/uracil permease family protein	51.47864207	1.270415672	0.124241682	0.188172854	Uniprot/SPTREMBL:C0HGJ4; Putative uncharacterized protein | GO:0055085; transmembrane transport | GO:0016020; membrane | GO:0006810; transport | GO:0005215; transporter activity
GRMZM2G437859_T06	transport.misc	solute carrier family 23 member 2, putative, expressed	AT2G34190.1	xanthine/uracil permease family protein	51.47864207	1.270415672	0.124241682	0.188172854	GO:0055085; transmembrane transport | GO:0016020; membrane | GO:0006810; transport | GO:0005215; transporter activity
GRMZM2G437859_T04	transport.misc	solute carrier family 23 member 2, putative, expressed	AT2G34190.1	xanthine/uracil permease family protein	51.47864207	1.270415672	0.124241682	0.188172854	Uniprot/SPTREMBL:C0HGJ4; Putative uncharacterized protein | Uniprot/SPTREMBL:C0HFN8; Putative uncharacterized protein | Uniprot/SPTREMBL:B6U820; Solute carrier family 23 member 2 | RefSeq_peptide:NP_001152037; solute carrier family 23 member 2 | RefSeq_dna:NM_001158565; solute carrier family 23 member 2 (LOC100285674) mRNA | GO:0055085; transmembrane transport | GO:0016020; membrane | GO:0006810;…
GRMZM2G455124_T01	transport.nitrate	nitrate transporter, putative, expressed	AT1G12940.1	ATNRT2.5 (nitrate transporter2.5); nitrate transmembrane transporter	1.78004628	0.081754985	0.03624544	0.058817458	UniGene:Zm.87600; Clone 4643 mRNA sequence | UniGene:Zm.36935; Transcribed locus strongly similar to XP_002456219.1 hypothetical protein SORBIDRAFT_03g032310 [Sorghum bicolor] | GO:0055085; transmembrane transport | GO:0046677; response to antibiotic | GO:0016021; integral to membrane | GO:0015904; tetracycline transport | GO:0015520; tetracycline:hydrogen antiporter activity | GO:0008152; metabo…
GRMZM2G467992_T01	transport.p- and v-ATPases	expressed protein	AT5G55290.1	ATP synthase subunit H family protein	73.88814486	51.66611454	40.42760613	43.05999566	GO:0015078; hydrogen ion transmembrane transporter activity | GO:0015991; ATP hydrolysis coupled proton transport | GO:0033179; proton-transporting V-type ATPase V0 domain
GRMZM2G028432_T01	transport.p- and v-ATPases.H+-transporting two-sector ATPase	vacuolar ATP synthase 16 kDa proteolipid subunit, putative, expressed	AT4G38920.1	ATVHA-C3 (VACUOLAR-TYPE H(+)-ATPASE C3); ATPase	293.5292156	53.59756002	23.07766019	32.33260255	Uniprot/SWISSPROT:Q41773; V-type proton ATPase 16 kDa proteolipid subunit Fragment (V-ATPase 16 kDa proteolipid subunit)(Vacuolar proton pump 16 kDa proteolipid subunit) | UniGene:Zm.98581; V-type H+-ATPase | GO:0033179; proton-transporting V-type ATPase V0 domain | GO:0033177; proton-transporting two-sector ATPase complex proton-transporting domain | GO:0015986; ATP synthesis coupled proton tran…
GRMZM2G101020_T01	transport.p- and v-ATPases.H+-transporting two-sector ATPase	vacuolar ATP synthase 16 kDa proteolipid subunit, putative, expressed	AT1G19910.1	AVA-P2; ATPase/ proton-transporting ATPase, rotational mechanism	307.3789537	54.73470538	31.17791714	45.49289913	Uniprot/SWISSPROT:Q41773; V-type proton ATPase 16 kDa proteolipid subunit Fragment (V-ATPase 16 kDa proteolipid subunit)(Vacuolar proton pump 16 kDa proteolipid subunit) | Uniprot/SPTREMBL:C0HF03; Putative uncharacterized protein | UniGene:Zm.84683; ATPase1 | GO:0033179; proton-transporting V-type ATPase V0 domain | GO:0033177; proton-transporting two-sector ATPase complex proton-transporting dom…
GRMZM2G141975_T01	transport.peptides and oligopeptides	oligopeptide transporter 4, putative	AT5G64410.1	OPT4 (OLIGOPEPTIDE TRANSPORTER 4); oligopeptide transporter	6.458201906	2.176435514	0.033529547	0.196481383	UniGene:Zm.17879; Transcribed locus moderately similar to NP_201246.1 OPT4 (OLIGOPEPTIDE TRANSPORTER 4); oligopeptide transporter [Arabidopsis thaliana] | UniGene:Zm.156042; Hypothetical protein LOC100304174 | UniGene:Zm.142161; Hypothetical protein LOC100275659 | UniGene:Zm.126119; Transcribed locus strongly similar to XP_002452706.1 hypothetical protein SORBIDRAFT_04g031070 [Sorghum bicolor] | …
GRMZM2G316889_T01	transport.peptides and oligopeptides	peptide transporter PTR2-B, putative, expressed	AT1G22540.1	proton-dependent oligopeptide transport (POT) family protein	7.347530713	1.076256931	0.384753237	0.587901136	Uniprot/SPTREMBL:C0HIH4; Putative uncharacterized protein | Uniprot/SPTREMBL:C0HHN2; Putative uncharacterized protein | RefSeq_peptide:NP_001168010; hypothetical protein LOC100381733 | RefSeq_dna:NM_001174539; hypothetical protein LOC100381733 (LOC100381733) mRNA | GO:0055085; transmembrane transport | GO:0016020; membrane | GO:0006857; oligopeptide transport | GO:0005215; transporter activity | …
GRMZM2G048363_T01	transport.phosphate	inorganic phosphate cotransporter, putative, expressed	AT5G44370.1	PHT4;6 (PHOSPHATE TRANSPORTER 4;6); carbohydrate transmembrane transporter/ inorganic phosphate transmembrane transporter/ organic anion transmembrane transporter/ sugar:hydrogen symporter	7.296412019	2.152325116	0.584365257	0.612181704	Uniprot/SPTREMBL:B6T9A5; Inorganic phosphate cotransporterPutative uncharacterized protein ; | UniGene:Zm.123140; Inorganic phosphate cotransporter | RefSeq_peptide:NP_001148973; inorganic phosphate cotransporter | RefSeq_dna:NM_001155501; inorganic phosphate cotransporter (LOC100282593) mRNA | GO:0055085; transmembrane transport | EntrezGene:100282593; inorganic phosphate cotransporter
GRMZM2G055025_T01	transport.porins	outer mitochondrial membrane protein porin, putative, expressed	AT5G67500.1	VDAC2 (VOLTAGE DEPENDENT ANION CHANNEL 2); voltage-gated anion channel	25.65669542	13.4057507	10.88338907	11.03171538	Uniprot/SPTREMBL:B6SS48; Outer mitochondrial membrane protein porin | RefSeq_peptide:NP_001147486; outer mitochondrial membrane protein porin | RefSeq_dna:NM_001154014; outer mitochondrial membrane protein porin (LOC100281095) nuclear gene encoding mitochondrial protein mRNA | GO:0055085; transmembrane transport | GO:0019867; outer membrane | GO:0009405; pathogenesis | GO:0008308; voltage-gated a…
GRMZM2G150616_T01	transport.porins	isochorismate synthase 1, chloroplast precursor, putative, expressed	AT3G01280.1	VDAC1 (VOLTAGE DEPENDENT ANION CHANNEL 1); voltage-gated anion channel	121.2895213	83.40487685	75.42305281	78.79165368	Uniprot/SPTREMBL:Q9SPD9; Voltage-dependent anion channel protein 1a | Uniprot/SPTREMBL:B4FT85; Isochorismate synthase 1Putative uncharacterized protein ; | UniGene:Zm.93822; Voltage-dependent anion channel protein 1a | RefSeq_peptide:NP_001105619; voltage-dependent anion channel protein 1a | RefSeq_dna:NM_001112149; voltage-dependent anion channel protein 1a (vdac1a) mRNA | GO:0055085; transmembr…
GRMZM2G062024_T01	transport.sugars	carbohydrate transporter/ sugar porter/ transporter, putative, expressed	AT5G64500.1	membrane protein-related	24.05225386	16.98116477	5.735521177	7.497367503	Uniprot/SPTREMBL:B6U8S7; Carbohydrate transporter/ sugar porter/ transporter | UniGene:Zm.138348; Carbohydrate transporter/ sugar porter/ transporter | UniGene:Zm.103727; Transcribed locus strongly similar to NP_001168011.1 hypothetical protein LOC100381734 [Zea mays] | RefSeq_peptide:NP_001152095; carbohydrate transporter/ sugar porter/ transporter | RefSeq_dna:NM_001158623; carbohydrate transpo…
GRMZM2G083173_T01	transport.sugars	hexose transporter, putative, expressed	AT4G35300.1	TMT2 (TONOPLAST MONOSACCHARIDE TRANSPORTER2); carbohydrate transmembrane transporter/ nucleoside transmembrane transporter/ sugar:hydrogen symporter	102.5839528	64.24110601	37.00342446	39.54371085	RefSeq_dna:NM_001158464; LOC100285573 (gpm305) mRNA | RefSeq_peptide:NP_001151936; LOC100285573 | UniGene:Zm.8068; LOC100285573 | Uniprot/SPTREMBL:B6U6U2; Hexose transporter | GO:0055085; transmembrane transport | GO:0022891; substrate-specific transmembrane transporter activity | GO:0016021; integral to membrane | GO:0016020; membrane | GO:0006810; transport | GO:0005215; transporter activity | …
GRMZM2G083173_T02	transport.sugars	hexose transporter, putative, expressed	AT4G35300.1	TMT2 (TONOPLAST MONOSACCHARIDE TRANSPORTER2); carbohydrate transmembrane transporter/ nucleoside transmembrane transporter/ sugar:hydrogen symporter	102.5839528	64.24110601	37.00342446	39.54371085	Uniprot/SPTREMBL:B6U6U2; Hexose transporter | RefSeq_peptide:NP_001151936; LOC100285573 | GO:0055085; transmembrane transport | GO:0022891; substrate-specific transmembrane transporter activity | GO:0016021; integral to membrane | GO:0016020; membrane | GO:0006810; transport | GO:0005215; transporter activity | EntrezGene:100285573; LOC100285573
GRMZM2G083173_T03	transport.sugars	hexose transporter, putative, expressed	AT4G35300.1	TMT2 (TONOPLAST MONOSACCHARIDE TRANSPORTER2); carbohydrate transmembrane transporter/ nucleoside transmembrane transporter/ sugar:hydrogen symporter	102.5839528	64.24110601	37.00342446	39.54371085	GO:0055085; transmembrane transport | GO:0022891; substrate-specific transmembrane transporter activity | GO:0016021; integral to membrane | GO:0016020; membrane | GO:0006810; transport | GO:0005215; transporter activity
GRMZM2G083173_T04	transport.sugars	hexose transporter, putative, expressed	AT4G35300.1	TMT2 (TONOPLAST MONOSACCHARIDE TRANSPORTER2); carbohydrate transmembrane transporter/ nucleoside transmembrane transporter/ sugar:hydrogen symporter	102.5839528	64.24110601	37.00342446	39.54371085	GO:0055085; transmembrane transport | GO:0022891; substrate-specific transmembrane transporter activity | GO:0016021; integral to membrane | GO:0016020; membrane | GO:0006810; transport | GO:0005215; transporter activity
GRMZM2G444801_T01	transport.sulphate	sulfate transporter 3.4, putative, expressed	AT3G15990.1	SULTR3;4 (SULFATE TRANSPORTER 3;4); sulfate transmembrane transporter	22.88747704	2.290749296	1.502792759	5.177985213	Uniprot/SPTREMBL:B6SYY9; Putative uncharacterized proteinSulfate transporter 3.4 ; | UniGene:Zm.86828; Sulfate transporter 3.4 | RefSeq_peptide:NP_001148179; sulfate transporter 3.4 | RefSeq_dna:NM_001154707; sulfate transporter 3.4 (LOC100281787) mRNA | GO:0055085; transmembrane transport | GO:0016021; integral to membrane | GO:0016020; membrane | EntrezGene:100281787; sulfate transporter 3.4 | …
GRMZM2G059937_T01	transport.unspecified anions	outer mitochondrial membrane protein porin, putative, expressed	AT5G57490.1	VDAC4 (VOLTAGE DEPENDENT ANION CHANNEL 4); voltage-gated anion channel	10.61462362	8.921115983	2.868493928	3.540127258	Uniprot/SPTREMBL:B6TAR9; Outer mitochondrial membrane protein porin | Uniprot/SPTREMBL:B6T1E3; Outer mitochondrial membrane protein porinPutative uncharacterized protein ; | UniGene:Zm.154666; TSA: Zea mays contig32601 mRNA sequence | UniGene:Zm.123287; Outer mitochondrial membrane protein porin | RefSeq_peptide:NP_001149101; outer mitochondrial membrane protein porin | RefSeq_dna:NM_001155629; o…
GRMZM2G002391_T02	transport.unspecified cations	nucleoside transporter, putative, expressed	AT1G70330.1	ENT1,AT (EQUILIBRATIVE NUCLEOTIDE TRANSPORTER 1); nucleoside transmembrane transporter/ nucleoside transmembrane transporter, against a concentration gradient	45.59967302	31.46390224	19.98262367	20.53826125	Uniprot/SPTREMBL:B6T345; Nucleoside transporter | Uniprot/SPTREMBL:B4FVE5; Putative uncharacterized protein | UniGene:Zm.79412; Nucleoside transporter | UniGene:Zm.120107; Transcribed locus moderately similar to NP_001148456.1 nucleoside transporter [Zea mays] | RefSeq_peptide:NP_001148456; nucleoside transporter | RefSeq_dna:NM_001154984; nucleoside transporter (LOC100282071) mRNA | GO:0051260; …
GRMZM2G311165_T03	transport.unspecified cations	sodium/hydrogen exchanger 2, putative, expressed	AT3G05030.1	NHX2 (SODIUM HYDROGEN EXCHANGER 2); sodium ion transmembrane transporter/ sodium:hydrogen antiporter	20.40017035	4.592349401	3.052513438	3.820515987	GO:0055085; transmembrane transport | GO:0016021; integral to membrane | GO:0015385; sodium:hydrogen antiporter activity | GO:0015299; solute:hydrogen antiporter activity | GO:0006885; regulation of pH | GO:0006814; sodium ion transport | GO:0006812; cation transport
GRMZM2G311165_T05	transport.unspecified cations	sodium/hydrogen exchanger 2, putative, expressed	AT3G05030.1	NHX2 (SODIUM HYDROGEN EXCHANGER 2); sodium ion transmembrane transporter/ sodium:hydrogen antiporter	20.40017035	4.592349401	3.052513438	3.820515987	GO:0055085; transmembrane transport | GO:0016021; integral to membrane | GO:0015385; sodium:hydrogen antiporter activity | GO:0006885; regulation of pH | GO:0006814; sodium ion transport
GRMZM2G311165_T06	transport.unspecified cations	sodium/hydrogen exchanger 2, putative, expressed	AT3G05030.1	NHX2 (SODIUM HYDROGEN EXCHANGER 2); sodium ion transmembrane transporter/ sodium:hydrogen antiporter	20.40017035	4.592349401	3.052513438	3.820515987	GO:0006814; sodium ion transport | GO:0006885; regulation of pH | GO:0015385; sodium:hydrogen antiporter activity | GO:0016021; integral to membrane | GO:0055085; transmembrane transport
GRMZM2G311165_T01	transport.unspecified cations	sodium/hydrogen exchanger 2, putative, expressed	AT3G05030.1	NHX2 (SODIUM HYDROGEN EXCHANGER 2); sodium ion transmembrane transporter/ sodium:hydrogen antiporter	20.40017035	4.592349401	3.052513438	3.820515987	UniGene:Zm.98853; LOC100193668 | GO:0055085; transmembrane transport | GO:0016021; integral to membrane | GO:0015385; sodium:hydrogen antiporter activity | GO:0015299; solute:hydrogen antiporter activity | GO:0006885; regulation of pH | GO:0006814; sodium ion transport | GO:0006812; cation transport
GRMZM2G311165_T02	transport.unspecified cations	sodium/hydrogen exchanger 2, putative, expressed	AT3G05030.1	NHX2 (SODIUM HYDROGEN EXCHANGER 2); sodium ion transmembrane transporter/ sodium:hydrogen antiporter	20.40017035	4.592349401	3.052513438	3.820515987	GO:0055085; transmembrane transport | GO:0016021; integral to membrane | GO:0015385; sodium:hydrogen antiporter activity | GO:0015299; solute:hydrogen antiporter activity | GO:0006885; regulation of pH | GO:0006814; sodium ion transport | GO:0006812; cation transport
GRMZM2G000632_T01	cell wall.precursor synthesis.MUR4	UDP-arabinose 4-epimerase 3, putative, expressed	AT1G30620.2	MUR4 (MURUS 4); UDP-arabinose 4-epimerase/ catalytic	8.613631218	13.50681961	1.707593047	0.934962236	GO:0050662; coenzyme binding | GO:0044237; cellular metabolic process | GO:0016857; racemase and epimerase activity acting on carbohydrates and derivatives | GO:0008324; cation transmembrane transporter activity | GO:0006813; potassium ion transport | GO:0006694; steroid biosynthetic process | GO:0006012; galactose metabolic process | GO:0005975; carbohydrate metabolic process | GO:0003978; UDP-g…
GRMZM2G000632_T02	cell wall.precursor synthesis.MUR4	UDP-arabinose 4-epimerase 3, putative, expressed	AT1G30620.2	MUR4 (MURUS 4); UDP-arabinose 4-epimerase/ catalytic	8.613631218	13.50681961	1.707593047	0.934962236	GO:0009058; biosynthetic process | GO:0016857; racemase and epimerase activity acting on carbohydrates and derivatives | GO:0044237; cellular metabolic process | GO:0050662; coenzyme binding | RefSeq_dna:NM_001165764; hypothetical protein LOC100304323 (LOC100304323) mRNA | RefSeq_peptide:NP_001159236; hypothetical protein LOC100304323 | UniGene:Zm.3057; Hypothetical protein LOC100304323 | Uniprot…
GRMZM2G000632_T03	cell wall.precursor synthesis.MUR4	UDP-arabinose 4-epimerase 3, putative, expressed	AT1G30620.2	MUR4 (MURUS 4); UDP-arabinose 4-epimerase/ catalytic	8.613631218	13.50681961	1.707593047	0.934962236	GO:0008324; cation transmembrane transporter activity | GO:0009058; biosynthetic process | GO:0016857; racemase and epimerase activity acting on carbohydrates and derivatives | GO:0044237; cellular metabolic process | GO:0050662; coenzyme binding | RefSeq_peptide:NP_001159236; hypothetical protein LOC100304323 | Uniprot/SPTREMBL:C0HET8; Putative uncharacterized protein | GO:0006813; potassium ion…
GRMZM2G176542_T02	lipid metabolism.lipid degradation.lipases.triacylglycerol lipase	triacylglycerol lipase, putative, expressed	AT1G05790.1	lipase class 3 family protein	3.825588394	29.78224092	2.341877087	0.348274742	GO:0050825; ice binding | GO:0050826; response to freezing | GO:0055085; transmembrane transport | UniGene:Zm.153014; TSA: Zea mays contig39911 mRNA sequence | GO:0042626; ATPase activity coupled to transmembrane movement of substances | GO:0042309; homoiothermy | GO:0016021; integral to membrane | GO:0006810; transport | GO:0006629; lipid metabolic process | GO:0005524; ATP binding | GO:0004806;…
GRMZM2G166176_T01	lipid metabolism.Phospholipid synthesis	glycerol-3-phosphate acyltransferase 8, putative, expressed	AT3G11430.1	GPAT5 (GLYCEROL-3-PHOSPHATE ACYLTRANSFERASE 5); 1-acylglycerol-3-phosphate O-acyltransferase/ acyltransferase/ organic anion transmembrane transporter	0	30.23212131	0.097477651	0.052727439	Uniprot/SPTREMBL:B8A2X2; Putative uncharacterized protein | UniGene:Zm.119405; Hypothetical protein LOC100280283 | RefSeq_peptide:NP_001146683; hypothetical protein LOC100280283 | RefSeq_dna:NM_001153211; hypothetical protein LOC100280283 (LOC100280283) mRNA | GO:0055085; transmembrane transport | GO:0016020; membrane | GO:0008415; acyltransferase activity | GO:0008152; metabolic process | GO:000…
GRMZM2G025977_T01	misc.oxidases - copper, flavone etc.	D-amino acid oxidase, putative, expressed	AT5G67290.1	FAD-dependent oxidoreductase family protein	28.3781206	35.44391853	20.78026171	18.64129458	RefSeq_peptide:NP_001105990; LOC100037820 | UniGene:Zm.150541; TSA: Zea mays contig11727 mRNA sequence | Uniprot/SPTREMBL:A0PFJ3; D-amino acid oxidase | Uniprot/SPTREMBL:B6TFA0; D-amino acid oxidase | Uniprot/SPTREMBL:C0PBF8; Putative uncharacterized protein | RefSeq_dna:NM_001112520; LOC100037820 (pco075778) mRNA | GO:0016491; oxidoreductase activity | GO:0008324; cation transmembrane transporte…
GRMZM2G025977_T02	misc.oxidases - copper, flavone etc.	D-amino acid oxidase, putative, expressed	AT5G67290.1	FAD-dependent oxidoreductase family protein	28.3781206	35.44391853	20.78026171	18.64129458	RefSeq_peptide:NP_001105990; LOC100037820 | UniGene:Zm.150541; TSA: Zea mays contig11727 mRNA sequence | Uniprot/SPTREMBL:A0PFJ3; D-amino acid oxidase | Uniprot/SPTREMBL:B6TFA0; D-amino acid oxidase | Uniprot/SPTREMBL:C0PBF8; Putative uncharacterized protein | RefSeq_dna:NM_001112520; LOC100037820 (pco075778) mRNA | GO:0016491; oxidoreductase activity | GO:0008324; cation transmembrane transporte…
GRMZM2G025977_T03	misc.oxidases - copper, flavone etc.	D-amino acid oxidase, putative, expressed	AT5G67290.1	FAD-dependent oxidoreductase family protein	28.3781206	35.44391853	20.78026171	18.64129458	UniGene:Zm.150541; TSA: Zea mays contig11727 mRNA sequence | UniGene:Zm.87115; LOC100037820 | Uniprot/SPTREMBL:A0PFJ3; D-amino acid oxidase | Uniprot/SPTREMBL:B6TFA0; D-amino acid oxidase | Uniprot/SPTREMBL:C0PBF8; Putative uncharacterized protein | RefSeq_peptide:NP_001105990; LOC100037820 | RefSeq_dna:NM_001112520; LOC100037820 (pco075778) mRNA | GO:0016491; oxidoreductase activity | GO:0008324…
GRMZM2G017365_T08	not assigned	NA	0	NA	4.004603554	4.524572849	1.626763842	1.257066028	GO:0055085; transmembrane transport | GO:0016020; membrane | GO:0008324; cation transmembrane transporter activity | GO:0006812; cation transport
GRMZM2G017365_T09	not assigned	NA	0	NA	4.004603554	4.524572849	1.626763842	1.257066028	GO:0006812; cation transport | GO:0008324; cation transmembrane transporter activity | GO:0016020; membrane | GO:0055085; transmembrane transport
GRMZM2G063262_T01	not assigned	steroid nuclear receptor, ligand-binding, putative, expressed	AT5G40640.1	unknown protein	5.979032322	15.47805445	5.420529763	4.66185905	UniGene:Zm.5288; TSA: Zea mays contig47081 mRNA sequence | UniGene:Zm.139979; TSA: Zea mays contig43777 mRNA sequence | GO:0016020; membrane | GO:0006810; transport | GO:0006355; regulation of transcription DNA-dependent | GO:0005634; nucleus | GO:0005337; nucleoside transmembrane transporter activity | GO:0003707; steroid hormone receptor activity | GO:0003700; transcription factor activity
GRMZM2G073954_T01	not assigned	arsenite transport subunit B, putative, expressed	AT1G02260.1	transmembrane protein, putative	26.92096315	28.90124043	14.46149496	9.828951524	Uniprot/SPTREMBL:B6SY85; Arsenite transport subunit BPutative uncharacterized protein ; | UniGene:Zm.86504; Arsenite transport subunit B | RefSeq_peptide:NP_001148124; arsenite transport subunit B | RefSeq_dna:NM_001154652; arsenite transport subunit B (LOC100281732) mRNA | GO:0055085; transmembrane transport | GO:0016021; integral to membrane | GO:0015746; citrate transport | GO:0015137; citrate…
GRMZM2G412085_T01	not assigned	NA	0	NA	4.561773051	10.47700438	3.401182743	2.718453934	Uniprot/SPTREMBL:B6THR2; Peptidase C45 acyl-coenzyme A/6-aminopenicillanic acid acyl-transferase | UniGene:Zm.132569; Peptidase C45 acyl-coenzyme A/6-aminopenicillanic acid acyl-transferase | RefSeq_peptide:NP_001149746; peptidase C45 acyl-coenzyme A/6-aminopenicillanic acid acyl-transferase | RefSeq_dna:NM_001156274; peptidase C45 acyl-coenzyme A/6-aminopenicillanic acid acyl-transferase (LOC100…
GRMZM2G473356_T01	not assigned	NA	0	NA	54.30239307	341.0190813	5.751274152	0.872861817	GO:0051260; protein homooligomerization | GO:0016021; integral to membrane | GO:0016020; membrane | GO:0015450; P-P-bond-hydrolysis-driven protein transmembrane transporter activity | GO:0009306; protein secretion | GO:0007017; microtubule-based process | GO:0005874; microtubule | GO:0005737; cytoplasm | GO:0005525; GTP binding
GRMZM2G080079_T01	protein.degradation.ubiquitin.E3.RING	RING-H2 finger protein ATL1Q, putative, expressed	AT1G74410.1	zinc finger (C3HC4-type RING finger) family protein	9.797346648	27.7461899	1.049578378	0.06812833	Uniprot/SPTREMBL:B6SUG0; Putative uncharacterized proteinRING-H2 finger protein ATL1Q ; | UniGene:Zm.138485; RING-H2 finger protein ATL1Q | RefSeq_peptide:NP_001147722; RING-H2 finger protein ATL1Q | RefSeq_dna:NM_001154250; RING-H2 finger protein ATL1Q (LOC100281332) mRNA | GO:0055085; transmembrane transport | GO:0016020; membrane | GO:0008270; zinc ion binding | GO:0006821; chloride transport …
GRMZM2G080079_T03	protein.degradation.ubiquitin.E3.RING	RING-H2 finger protein ATL1Q, putative, expressed	AT1G74410.1	zinc finger (C3HC4-type RING finger) family protein	9.797346648	27.7461899	1.049578378	0.06812833	GO:0055085; transmembrane transport | GO:0016020; membrane | GO:0006821; chloride transport | GO:0005247; voltage-gated chloride channel activity
GRMZM2G080079_T06	protein.degradation.ubiquitin.E3.RING	RING-H2 finger protein ATL1Q, putative, expressed	AT1G74410.1	zinc finger (C3HC4-type RING finger) family protein	9.797346648	27.7461899	1.049578378	0.06812833	GO:0055085; transmembrane transport | GO:0016020; membrane | GO:0006821; chloride transport | GO:0005247; voltage-gated chloride channel activity
GRMZM2G065154_T01	stress.biotic	enhanced disease susceptibility 5, putative, expressed	AT2G21340.1	antiporter/ drug transporter	9.873601392	15.68109028	4.428404312	2.793441269	UniGene:Zm.125442; TSA: Zea mays contig17251 mRNA sequence | GO:0055085; transmembrane transport | GO:0016020; membrane | GO:0015297; antiporter activity | GO:0015238; drug transmembrane transporter activity | GO:0006855; drug transmembrane transport
GRMZM2G025860_T01	transport.ABC transporters and multidrug resistance systems	multidrug resistance protein 22, putative, expressed	AT3G28345.1	ABC transporter family protein	3.340669216	8.758027879	2.204114593	2.001527742	Uniprot/SPTREMBL:C0PJV4; Putative uncharacterized protein | RefSeq_peptide:NP_001169993; hypothetical protein LOC100383898 | RefSeq_dna:NM_001176522; hypothetical protein LOC100383898 (LOC100383898) mRNA | GO:0055085; transmembrane transport | GO:0042626; ATPase activity coupled to transmembrane movement of substances | GO:0017111; nucleoside-triphosphatase activity | GO:0016887; ATPase activity …
GRMZM2G119894_T01	transport.ABC transporters and multidrug resistance systems	multidrug resistance protein 17, putative, expressed	AT2G47000.1	ABCB4 (ATP BINDING CASSETTE SUBFAMILY B4); ATPase, coupled to transmembrane movement of substances / xenobiotic-transporting ATPase	6.315047007	11.69649616	3.960330235	1.643693602	UniGene:Zm.96214; TSA: Zea mays contig05621 mRNA sequence | GO:0055085; transmembrane transport | GO:0042626; ATPase activity coupled to transmembrane movement of substances | GO:0017111; nucleoside-triphosphatase activity | GO:0016887; ATPase activity | GO:0016021; integral to membrane | GO:0006810; transport | GO:0005524; ATP binding | GO:0000166; nucleotide binding
GRMZM2G119894_T02	transport.ABC transporters and multidrug resistance systems	multidrug resistance protein 17, putative, expressed	AT2G47000.1	ABCB4 (ATP BINDING CASSETTE SUBFAMILY B4); ATPase, coupled to transmembrane movement of substances / xenobiotic-transporting ATPase	6.315047007	11.69649616	3.960330235	1.643693602	UniGene:Zm.96214; TSA: Zea mays contig05621 mRNA sequence | UniGene:Zm.93145; Transcribed locus moderately similar to NP_192091.1 PGP3 (P-GLYCOPROTEIN 3); ATPase coupled to transmembrane movement of substances [Arabidopsis thaliana] | GO:0055085; transmembrane transport | GO:0042626; ATPase activity coupled to transmembrane movement of substances | GO:0016021; integral to membrane | GO:0006810; t…
GRMZM2G119894_T03	transport.ABC transporters and multidrug resistance systems	multidrug resistance protein 17, putative, expressed	AT2G47000.1	ABCB4 (ATP BINDING CASSETTE SUBFAMILY B4); ATPase, coupled to transmembrane movement of substances / xenobiotic-transporting ATPase	6.315047007	11.69649616	3.960330235	1.643693602	GO:0055085; transmembrane transport | GO:0042626; ATPase activity coupled to transmembrane movement of substances | GO:0017111; nucleoside-triphosphatase activity | GO:0016887; ATPase activity | GO:0016021; integral to membrane | GO:0006810; transport | GO:0005524; ATP binding | GO:0000166; nucleotide binding
GRMZM2G142870_T01	transport.ABC transporters and multidrug resistance systems	multidrug resistance-associated protein 4, putative, expressed	AT3G62700.1	ATMRP10; ATPase, coupled to transmembrane movement of substances	38.88732657	47.07661977	36.69523193	36.17325382	UniGene:Zm.25729; Transcribed locus moderately similar to NP_001043001.1 Os01g0356100 [Oryza sativa (japonica cultivar-group)] | UniGene:Zm.17901; TSA: Zea mays contig14719 mRNA sequence | GO:0055085; transmembrane transport | GO:0042626; ATPase activity coupled to transmembrane movement of substances | GO:0017111; nucleoside-triphosphatase activity | GO:0016887; ATPase activity | GO:0016021; int…
GRMZM2G142870_T02	transport.ABC transporters and multidrug resistance systems	multidrug resistance-associated protein 4, putative, expressed	AT3G62700.1	ATMRP10; ATPase, coupled to transmembrane movement of substances	38.88732657	47.07661977	36.69523193	36.17325382	UniGene:Zm.127234; Clone 1503562 mRNA sequence | GO:0055085; transmembrane transport | GO:0042626; ATPase activity coupled to transmembrane movement of substances | GO:0016021; integral to membrane | GO:0006810; transport | GO:0005524; ATP binding
GRMZM2G007810_T01	transport.amino acids	high-affinity cationic amino acid transporter 1, putative, expressed	AT1G58030.1	CAT2 (CATIONIC AMINO ACID TRANSPORTER 2); amino acid transmembrane transporter	5.101225771	10.1499605	4.730998413	3.746286883	Uniprot/SPTREMBL:C0HEZ5; Putative uncharacterized protein | GO:0055085; transmembrane transport | RefSeq_dna:NM_001158087; high-affinity cationic amino acid transporter 1 (LOC100285193) mRNA | RefSeq_peptide:NP_001151559; high-affinity cationic amino acid transporter 1 | UniGene:Zm.4746; High-affinity cationic amino acid transporter 1 | Uniprot/SPTREMBL:B4FYP2; Putative uncharacterized protein | …
GRMZM2G007810_T02	transport.amino acids	high-affinity cationic amino acid transporter 1, putative, expressed	AT1G58030.1	CAT2 (CATIONIC AMINO ACID TRANSPORTER 2); amino acid transmembrane transporter	5.101225771	10.1499605	4.730998413	3.746286883	GO:0016020; membrane | GO:0055085; transmembrane transport | RefSeq_peptide:NP_001151559; high-affinity cationic amino acid transporter 1 | Uniprot/SPTREMBL:B4FYP2; Putative uncharacterized protein | Uniprot/SPTREMBL:B6U1T8; High-affinity cationic amino acid transporter 1 | Uniprot/SPTREMBL:C0HEZ5; Putative uncharacterized protein | GO:0015171; amino acid transmembrane transporter activity | GO:0…
GRMZM2G177659_T03	transport.amino acids	amino acid transporter-like protein, putative, expressed	AT3G30390.2	amino acid transporter family protein	62.84905501	123.478484	58.35754518	27.36146087	Uniprot/SPTREMBL:B6TE03; Amino acid transporter-like protein | RefSeq_peptide:NP_001149404; LOC100283030 | GO:0016020; membrane | GO:0015450; P-P-bond-hydrolysis-driven protein transmembrane transporter activity | GO:0015031; protein transport | GO:0006865; amino acid transport | EntrezGene:100283030; LOC100283030
GRMZM2G177659_T04	transport.amino acids	amino acid transporter-like protein, putative, expressed	AT3G30390.2	amino acid transporter family protein	62.84905501	123.478484	58.35754518	27.36146087	GO:0017153; sodium:dicarboxylate symporter activity | GO:0016020; membrane | GO:0015450; P-P-bond-hydrolysis-driven protein transmembrane transporter activity | GO:0015031; protein transport | GO:0006865; amino acid transport | GO:0006835; dicarboxylic acid transport
GRMZM2G177659_T01	transport.amino acids	amino acid transporter-like protein, putative, expressed	AT3G30390.2	amino acid transporter family protein	62.84905501	123.478484	58.35754518	27.36146087	Uniprot/SPTREMBL:B6TE03; Amino acid transporter-like protein | UniGene:Zm.94640; LOC100283030 | RefSeq_peptide:NP_001149404; LOC100283030 | RefSeq_dna:NM_001155932; LOC100283030 (pco106241) mRNA | GO:0016020; membrane | GO:0015450; P-P-bond-hydrolysis-driven protein transmembrane transporter activity | GO:0015031; protein transport | GO:0006865; amino acid transport | EntrezGene:100283030; LOC100…
GRMZM2G331902_T01	transport.amino acids	cationic amino acid transporter, putative, expressed	AT3G19553.1	amino acid permease family protein	3.539182904	4.522429354	1.985518194	1.010826343	Uniprot/SPTREMBL:C0P7B1; Putative uncharacterized protein | UniGene:Zm.21079; Hypothetical protein LOC100277833 | RefSeq_peptide:NP_001144770; hypothetical protein LOC100277833 | RefSeq_dna:NM_001151298; hypothetical protein LOC100277833 (LOC100277833) mRNA | GO:0055085; transmembrane transport | GO:0016020; membrane | GO:0015171; amino acid transmembrane transporter activity | GO:0006865; amino …
GRMZM2G331902_T03	transport.amino acids	cationic amino acid transporter, putative, expressed	AT3G19553.1	amino acid permease family protein	3.539182904	4.522429354	1.985518194	1.010826343	Uniprot/SPTREMBL:B7ZXW6; Putative uncharacterized protein | GO:0055085; transmembrane transport | GO:0016020; membrane | GO:0015171; amino acid transmembrane transporter activity | GO:0006865; amino acid transport | GO:0006810; transport
GRMZM2G148118_T01	transport.cyclic nucleotide or calcium regulated channels	cyclic nucleotide-gated ion channel 1, putative, expressed	AT5G53130.1	CNGC1 (CYCLIC NUCLEOTIDE GATED CHANNEL 1); calmodulin binding / cation channel/ cyclic nucleotide binding / intracellular cyclic nucleotide activated cation channel/ inward rectifier potassium channel	5.43848921	8.804817165	5.158855051	2.619072165	Uniprot/SPTREMBL:B6U0R1; Cyclic nucleotide-gated ion channel 1 | UniGene:Zm.98987; LOC100285094 | UniGene:Zm.100453; TSA: Zea mays contig07051 mRNA sequence | RefSeq_peptide:NP_001151461; LOC100285094 | RefSeq_dna:NM_001157989; LOC100285094 (gpm871) mRNA | GO:0055085; transmembrane transport | GO:0016020; membrane | EntrezGene:100285094; LOC100285094 | GO:0005216; ion channel activity | GO:000524…
GRMZM2G148118_T02	transport.cyclic nucleotide or calcium regulated channels	cyclic nucleotide-gated ion channel 1, putative, expressed	AT5G53130.1	CNGC1 (CYCLIC NUCLEOTIDE GATED CHANNEL 1); calmodulin binding / cation channel/ cyclic nucleotide binding / intracellular cyclic nucleotide activated cation channel/ inward rectifier potassium channel	5.43848921	8.804817165	5.158855051	2.619072165	Uniprot/SPTREMBL:B6U0R1; Cyclic nucleotide-gated ion channel 1 | RefSeq_peptide:NP_001151461; LOC100285094 | GO:0055085; transmembrane transport | GO:0016020; membrane | GO:0006813; potassium ion transport | GO:0006811; ion transport | GO:0005249; voltage-gated potassium channel activity | GO:0005216; ion channel activity | EntrezGene:100285094; LOC100285094
GRMZM2G078154_T01	transport.metabolite transporters at the mitochondrial membrane	mitochondrial carnitine/acylcarnitine carrier-like protein, putative, expressed	AT2G33820.1	MBAC1; L-histidine transmembrane transporter/ L-lysine transmembrane transporter/ L-ornithine transmembrane transporter/ arginine transmembrane transporter/ binding	4.022345983	4.243844688	0.940737851	0.315845537	Uniprot/SPTREMBL:B4F8D5; Putative uncharacterized protein | UniGene:Zm.30403; Transcribed locus | UniGene:Zm.16101; Hypothetical protein LOC100191316 | RefSeq_peptide:NP_001130222; hypothetical protein LOC100191316 | RefSeq_dna:NM_001136750; hypothetical protein LOC100191316 (LOC100191316) mRNA | GO:0055085; transmembrane transport | GO:0016020; membrane | GO:0006810; transport | GO:0005743; mito…
GRMZM2G078154_T02	transport.metabolite transporters at the mitochondrial membrane	mitochondrial carnitine/acylcarnitine carrier-like protein, putative, expressed	AT2G33820.1	MBAC1; L-histidine transmembrane transporter/ L-lysine transmembrane transporter/ L-ornithine transmembrane transporter/ arginine transmembrane transporter/ binding	4.022345983	4.243844688	0.940737851	0.315845537	GO:0055085; transmembrane transport | GO:0016020; membrane | GO:0006810; transport | GO:0005743; mitochondrial inner membrane | GO:0005488; binding | GO:0005215; transporter activity
GRMZM2G078154_T03	transport.metabolite transporters at the mitochondrial membrane	mitochondrial carnitine/acylcarnitine carrier-like protein, putative, expressed	AT2G33820.1	MBAC1; L-histidine transmembrane transporter/ L-lysine transmembrane transporter/ L-ornithine transmembrane transporter/ arginine transmembrane transporter/ binding	4.022345983	4.243844688	0.940737851	0.315845537	Uniprot/SPTREMBL:C4JBR5; Putative uncharacterized protein | GO:0055085; transmembrane transport | GO:0016020; membrane | GO:0006810; transport | GO:0005743; mitochondrial inner membrane | GO:0005488; binding | GO:0005215; transporter activity
GRMZM2G078154_T04	transport.metabolite transporters at the mitochondrial membrane	mitochondrial carnitine/acylcarnitine carrier-like protein, putative, expressed	AT2G33820.1	MBAC1; L-histidine transmembrane transporter/ L-lysine transmembrane transporter/ L-ornithine transmembrane transporter/ arginine transmembrane transporter/ binding	4.022345983	4.243844688	0.940737851	0.315845537	GO:0055085; transmembrane transport | GO:0016020; membrane | GO:0006810; transport | GO:0005743; mitochondrial inner membrane | GO:0005488; binding
GRMZM2G178460_T01	transport.metabolite transporters at the mitochondrial membrane	protein brittle-1, chloroplast precursor, putative, expressed	AT5G01500.1	mitochondrial substrate carrier family protein	22.54312913	28.04032008	9.291572196	7.758062014	GO:0006839; mitochondrial transport | GO:0016020; membrane | GO:0055085; transmembrane transport | RefSeq_dna:NM_001156828; LOC100283930 (pco142634) mRNA | RefSeq_peptide:NP_001150300; LOC100283930 | UniGene:Zm.17507; LOC100283930 | Uniprot/SPTREMBL:B6TN88; Protein brittle-1Putative uncharacterized protein ; | GO:0006810; transport | GO:0006566; threonine metabolic process | EntrezGene:100283930;…
GRMZM2G045849_T01	transport.metal	zinc transporter 1 precursor, putative, expressed	AT3G12750.1	ZIP1 (ZINC TRANSPORTER 1 PRECURSOR); zinc ion transmembrane transporter	0.203346712	2.030157346	0.121628993	0.118424412	EntrezGene:100282628; zinc transporter 1 | Uniprot/SPTREMBL:B6T9K8; Zinc transporter 1 | UniGene:Zm.23274; Zinc transporter 1 | RefSeq_peptide:NP_001149008; zinc transporter 1 | RefSeq_dna:NM_001155536; zinc transporter 1 (LOC100282628) mRNA | GO:0055085; transmembrane transport | GO:0046873; metal ion transmembrane transporter activity | GO:0030001; metal ion transport | GO:0017153; sodium:dicar…
GRMZM2G084192_T01	transport.metal	cobalt ion transporter, putative, expressed	AT3G21580.2	NA	9.284767629	16.00332102	7.094948539	4.597987636	Uniprot/SPTREMBL:B4FJJ6; Putative uncharacterized protein | UniGene:Zm.18647; Hypothetical protein LOC100216748 | RefSeq_peptide:NP_001136623; hypothetical protein LOC100216748 | RefSeq_dna:NM_001143151; hypothetical protein LOC100216748 (LOC100216748) mRNA | GO:0015087; cobalt ion transmembrane transporter activity | GO:0009236; cobalamin biosynthetic process | GO:0006824; cobalt ion transport |…
GRMZM2G041050_T01	transport.misc	solute carrier family 23 member 2, putative, expressed	AT2G26510.1	PDE135 (pigment defective embryo 135); transmembrane transporter	32.10966926	50.76331944	25.74096131	20.39992049	UniGene:Zm.94512; TSA: Zea mays contig04678 mRNA sequence | UniGene:Zm.102894; Transcribed locus moderately similar to NP_001067149.1 Os12g0583900 [Oryza sativa Japonica Group] | GO:0055085; transmembrane transport | GO:0016020; membrane | GO:0006810; transport | GO:0005215; transporter activity
GRMZM2G041050_T02	transport.misc	solute carrier family 23 member 2, putative, expressed	AT2G26510.1	PDE135 (pigment defective embryo 135); transmembrane transporter	32.10966926	50.76331944	25.74096131	20.39992049	UniGene:Zm.94512; TSA: Zea mays contig04678 mRNA sequence | UniGene:Zm.102894; Transcribed locus moderately similar to NP_001067149.1 Os12g0583900 [Oryza sativa Japonica Group] | GO:0055085; transmembrane transport | GO:0016020; membrane | GO:0006810; transport | GO:0005215; transporter activity
GRMZM2G041050_T03	transport.misc	solute carrier family 23 member 2, putative, expressed	AT2G26510.1	PDE135 (pigment defective embryo 135); transmembrane transporter	32.10966926	50.76331944	25.74096131	20.39992049	UniGene:Zm.102894; Transcribed locus moderately similar to NP_001067149.1 Os12g0583900 [Oryza sativa Japonica Group] | GO:0055085; transmembrane transport | GO:0016020; membrane | GO:0006810; transport | GO:0005215; transporter activity
GRMZM2G041050_T04	transport.misc	solute carrier family 23 member 2, putative, expressed	AT2G26510.1	PDE135 (pigment defective embryo 135); transmembrane transporter	32.10966926	50.76331944	25.74096131	20.39992049	UniGene:Zm.102894; Transcribed locus moderately similar to NP_001067149.1 Os12g0583900 [Oryza sativa Japonica Group] | GO:0055085; transmembrane transport | GO:0016020; membrane | GO:0006810; transport | GO:0005215; transporter activity
GRMZM2G041050_T05	transport.misc	solute carrier family 23 member 2, putative, expressed	AT2G26510.1	PDE135 (pigment defective embryo 135); transmembrane transporter	32.10966926	50.76331944	25.74096131	20.39992049	GO:0005215; transporter activity | GO:0006810; transport | GO:0016020; membrane | GO:0055085; transmembrane transport | UniGene:Zm.102894; Transcribed locus moderately similar to NP_001067149.1 Os12g0583900 [Oryza sativa Japonica Group]
GRMZM2G041050_T06	transport.misc	solute carrier family 23 member 2, putative, expressed	AT2G26510.1	PDE135 (pigment defective embryo 135); transmembrane transporter	32.10966926	50.76331944	25.74096131	20.39992049	UniGene:Zm.102894; Transcribed locus moderately similar to NP_001067149.1 Os12g0583900 [Oryza sativa Japonica Group] | GO:0055085; transmembrane transport | GO:0016020; membrane | GO:0006810; transport | GO:0005215; transporter activity
GRMZM2G041050_T07	transport.misc	solute carrier family 23 member 2, putative, expressed	AT2G26510.1	PDE135 (pigment defective embryo 135); transmembrane transporter	32.10966926	50.76331944	25.74096131	20.39992049	UniGene:Zm.102894; Transcribed locus moderately similar to NP_001067149.1 Os12g0583900 [Oryza sativa Japonica Group] | GO:0055085; transmembrane transport | GO:0016020; membrane | GO:0006810; transport | GO:0005215; transporter activity
GRMZM2G119496_T01	transport.misc	transparent testa 12 protein, putative, expressed	AT5G52450.1	MATE efflux protein-related	0.495370483	7.096449354	0.323235196	0.034968762	Uniprot/SPTREMBL:Q5GAV3; Putative integral membrane protein | Uniprot/SPTREMBL:B4FTY7; Putative uncharacterized protein | GO:0055085; transmembrane transport | GO:0016020; membrane | GO:0015297; antiporter activity | GO:0015238; drug transmembrane transporter activity | GO:0006855; drug transmembrane transport
GRMZM2G481440_T02	transport.misc	transparent testa 12 protein, putative, expressed	AT5G38030.1	MATE efflux family protein	5.763063806	8.646564207	0.796202915	0.664387489	Uniprot/SPTREMBL:C4J6C8; Putative uncharacterized protein | UniGene:Zm.25624; Full-length cDNA clone ZM_BFc0158P24 | GO:0055085; transmembrane transport | GO:0016020; membrane | GO:0015297; antiporter activity | GO:0015238; drug transmembrane transporter activity | GO:0006855; drug transmembrane transport
GRMZM2G055834_T01	transport.peptides and oligopeptides	peptide transporter PTR2, putative, expressed	AT2G37900.1	proton-dependent oligopeptide transport (POT) family protein	4.939998926	12.61484055	2.94622669	1.223047327	Uniprot/SPTREMBL:B4F9V6; Putative uncharacterized protein | UniGene:Zm.42873; Hypothetical protein LOC100191709 | RefSeq_peptide:NP_001130610; hypothetical protein LOC100191709 | RefSeq_dna:NM_001137138; hypothetical protein LOC100191709 (LOC100191709) mRNA | GO:0055085; transmembrane transport | GO:0016020; membrane | GO:0006857; oligopeptide transport | GO:0006810; transport | GO:0005215; trans…
GRMZM2G085833_T01	transport.peptides and oligopeptides	transposon protein, putative, unclassified, expressed	AT3G27020.1	YSL6 (YELLOW STRIPE LIKE 6); oligopeptide transporter	42.12785293	49.35103801	13.52097803	8.277827894	Uniprot/SPTREMBL:B4FBI3; Putative uncharacterized protein | UniGene:Zm.96005; Transcribed locus strongly similar to XP_002446309.1 hypothetical protein SORBIDRAFT_06g013960 [Sorghum bicolor] | UniGene:Zm.5546; Hypothetical protein LOC100192483 | RefSeq_peptide:NP_001131175; hypothetical protein LOC100192483 | RefSeq_dna:NM_001137703; hypothetical protein LOC100192483 (LOC100192483) mRNA | MaizeGD…
GRMZM2G085833_T02	transport.peptides and oligopeptides	transposon protein, putative, unclassified, expressed	AT3G27020.1	YSL6 (YELLOW STRIPE LIKE 6); oligopeptide transporter	42.12785293	49.35103801	13.52097803	8.277827894	GO:0055085; transmembrane transport | UniGene:Zm.96005; Transcribed locus strongly similar to XP_002446309.1 hypothetical protein SORBIDRAFT_06g013960 [Sorghum bicolor]
GRMZM2G085833_T03	transport.peptides and oligopeptides	transposon protein, putative, unclassified, expressed	AT3G27020.1	YSL6 (YELLOW STRIPE LIKE 6); oligopeptide transporter	42.12785293	49.35103801	13.52097803	8.277827894	Uniprot/SPTREMBL:B4FBI3; Putative uncharacterized protein | RefSeq_peptide:NP_001131175; hypothetical protein LOC100192483 | GO:0055085; transmembrane transport | EntrezGene:100192483; hypothetical protein LOC100192483
GRMZM2G152555_T01	transport.peptides and oligopeptides	oligopeptide transporter 5, putative, expressed	AT5G55930.1	OPT1 (OLIGOPEPTIDE TRANSPORTER 1); oligopeptide transporter	4.243308357	8.554310054	1.19074461	0.089354285	UniGene:Zm.34342; Full-length cDNA clone ZM_BFc0166G09 | UniGene:Zm.122707; Transcribed locus weakly similar to XP_002329927.1 oligopeptide transporter OPT family [Populus trichocarpa] | GO:0055085; transmembrane transport | GO:0006364; rRNA processing
GRMZM2G152555_T02	transport.peptides and oligopeptides	oligopeptide transporter 5, putative, expressed	AT5G55930.1	OPT1 (OLIGOPEPTIDE TRANSPORTER 1); oligopeptide transporter	4.243308357	8.554310054	1.19074461	0.089354285	GO:0006364; rRNA processing | GO:0055085; transmembrane transport
GRMZM2G368398_T01	transport.peptides and oligopeptides	transposon protein, putative, unclassified, expressed	AT1G65730.1	YSL7 (YELLOW STRIPE LIKE 7); oligopeptide transporter	2.901329444	11.1913554	1.49968039	0.477481108	Uniprot/SPTREMBL:C0PHI2; Oligopeptide transporterPutative uncharacterized protein ; | Uniprot/SPTREMBL:B6UBR8; Transposon protein | Uniprot/SPTREMBL:B4FLT2; Putative uncharacterized protein | UniGene:Zm.96418; LOC100272237 | UniGene:Zm.77859; Transposon protein | UniGene:Zm.137816; Transcribed locus strongly similar to NP_001152285.1 transposon protein [Zea mays] | UniGene:Zm.119117; Transcribed …
GRMZM2G036916_T01	transport.potassium	potassium transporter 12, putative, expressed	AT1G60160.1	potassium transporter family protein	21.17561931	35.24566587	20.75249549	14.65646456	Uniprot/SPTREMBL:C0PFE3; Putative uncharacterized protein | UniGene:Zm.7389; Hypothetical protein LOC100383367 | UniGene:Zm.109999; Transcribed locus | RefSeq_peptide:NP_001169494; hypothetical protein LOC100383367 | RefSeq_dna:NM_001176023; hypothetical protein LOC100383367 (LOC100383367) mRNA | GO:0016020; membrane | GO:0015079; potassium ion transmembrane transporter activity | GO:0006813; pot…
GRMZM2G036916_T02	transport.potassium	potassium transporter 12, putative, expressed	AT1G60160.1	potassium transporter family protein	21.17561931	35.24566587	20.75249549	14.65646456	GO:0016020; membrane | GO:0015079; potassium ion transmembrane transporter activity | GO:0006813; potassium ion transport
GRMZM2G040158_T02	transport.potassium	inner membrane protein ybaL, putative, expressed	AT5G51710.1	KEA5; potassium ion transmembrane transporter/ potassium:hydrogen antiporter	3.983440342	8.929549335	2.873829383	2.52210782	Uniprot/SPTREMBL:C0HEL6; Putative uncharacterized protein | UniGene:Zm.145059; TSA: Zea mays contig50291 mRNA sequence | GO:0055085; transmembrane transport | GO:0016021; integral to membrane | GO:0016020; membrane | GO:0015299; solute:hydrogen antiporter activity | GO:0006812; cation transport | GO:0006810; transport | GO:0005337; nucleoside transmembrane transporter activity
GRMZM2G040158_T03	transport.potassium	inner membrane protein ybaL, putative, expressed	AT5G51710.1	KEA5; potassium ion transmembrane transporter/ potassium:hydrogen antiporter	3.983440342	8.929549335	2.873829383	2.52210782	RefSeq_dna:NM_001153818; inner membrane protein ybaL (LOC100280898) mRNA | RefSeq_peptide:NP_001147290; inner membrane protein ybaL | UniGene:Zm.139464; Full-length cDNA clone ZM_BFa0085A15 | UniGene:Zm.145059; TSA: Zea mays contig50291 mRNA sequence | UniGene:Zm.64562; Inner membrane protein ybaL | Uniprot/SPTREMBL:B6SP24; Inner membrane protein ybaL | GO:0055085; transmembrane transport | GO:00…
GRMZM2G066820_T01	transport.sugars	arabinose-proton symporter, putative, expressed	AT2G20780.1	mannitol transporter, putative	6.32410827	17.92399782	3.964700512	2.335344763	GO:0046677; response to antibiotic | GO:0055085; transmembrane transport | RefSeq_dna:NM_001155604; arabinose-proton symporter (LOC100282697) mRNA | RefSeq_peptide:NP_001149076; arabinose-proton symporter | Uniprot/SPTREMBL:B4FKF2; Putative uncharacterized protein | Uniprot/SPTREMBL:B6TAG3; Arabinose-proton symporterPutative uncharacterized protein ; | GO:0022891; substrate-specific transmembrane…
GRMZM2G066820_T02	transport.sugars	arabinose-proton symporter, putative, expressed	AT2G20780.1	mannitol transporter, putative	6.32410827	17.92399782	3.964700512	2.335344763	GO:0022891; substrate-specific transmembrane transporter activity | GO:0046677; response to antibiotic | GO:0055085; transmembrane transport | UniGene:Zm.86594; Arabinose-proton symporter | Uniprot/SPTREMBL:B4FKF2; Putative uncharacterized protein | Uniprot/SPTREMBL:C4J0N0; Putative uncharacterized protein | GO:0017153; sodium:dicarboxylate symporter activity | GO:0016021; integral to membrane | …
GRMZM2G093598_T02	transport.sugars	UDP-N-acetylglucosamine transporter, putative, expressed	AT5G41760.2	nucleotide-sugar transporter family protein	7.035092769	7.53739722	2.705436726	2.225200348	Uniprot/SPTREMBL:B4FZ94; Putative uncharacterized protein | UniGene:Zm.28172; LOC100274139 | RefSeq_peptide:NP_001141989; hypothetical protein LOC100274139 | RefSeq_dna:NM_001148517; LOC100274139 (pco112312a) mRNA | GO:0055085; transmembrane transport | GO:0016021; integral to membrane | GO:0015780; nucleotide-sugar transport | GO:0008643; carbohydrate transport | GO:0005351; sugar:hydrogen sympo…
GRMZM2G122869_T01	transport.sugars	sugar transporter, putative, expressed	AT4G35300.1	TMT2 (TONOPLAST MONOSACCHARIDE TRANSPORTER2); carbohydrate transmembrane transporter/ nucleoside transmembrane transporter/ sugar:hydrogen symporter	6.510589334	7.885649307	3.672135174	3.625190769	Uniprot/SPTREMBL:B4FNH7; Putative uncharacterized protein | UniGene:Zm.97015; Hypothetical protein LOC100272411 | RefSeq_peptide:NP_001140361; hypothetical protein LOC100272411 | RefSeq_dna:NM_001146889; hypothetical protein LOC100272411 (LOC100272411) mRNA | GO:0055085; transmembrane transport | GO:0022891; substrate-specific transmembrane transporter activity | GO:0016021; integral to membrane …
GRMZM2G160460_T01	transport.sugars	solute carrier family 2, facilitated glucose transporter member 8, putative, expressed	AT1G19450.1	integral membrane protein, putative / sugar transporter family protein	8.436374836	15.5997388	5.360051364	3.28051727	GO:0017153; sodium:dicarboxylate symporter activity | GO:0022891; substrate-specific transmembrane transporter activity | GO:0046677; response to antibiotic | GO:0055085; transmembrane transport | RefSeq_dna:NM_001154359; solute carrier family 2 facilitated glucose transporter member 8 (LOC100281441) mRNA | RefSeq_peptide:NP_001147831; solute carrier family 2 facilitated glucose transporter membe…
GRMZM2G160460_T02	transport.sugars	solute carrier family 2, facilitated glucose transporter member 8, putative, expressed	AT1G19450.1	integral membrane protein, putative / sugar transporter family protein	8.436374836	15.5997388	5.360051364	3.28051727	GO:0016021; integral to membrane | GO:0017153; sodium:dicarboxylate symporter activity | GO:0022891; substrate-specific transmembrane transporter activity | GO:0046677; response to antibiotic | GO:0055085; transmembrane transport | RefSeq_peptide:NP_001147831; solute carrier family 2 facilitated glucose transporter member 8 | Uniprot/SPTREMBL:B4FZA5; Putative uncharacterized proteinSolute carrier…
GRMZM2G160460_T03	transport.sugars	solute carrier family 2, facilitated glucose transporter member 8, putative, expressed	AT1G19450.1	integral membrane protein, putative / sugar transporter family protein	8.436374836	15.5997388	5.360051364	3.28051727	GO:0055085; transmembrane transport | GO:0022891; substrate-specific transmembrane transporter activity | GO:0016020; membrane | GO:0006810; transport | GO:0005215; transporter activity
GRMZM2G164743_T01	transport.sugars	carbohydrate transporter/ sugar porter/ transporter, putative, expressed	AT5G64500.1	membrane protein-related	12.51215315	15.1049924	7.134461727	5.790816635	Uniprot/SPTREMBL:C0HIH5; Putative uncharacterized protein | UniGene:Zm.96470; Hypothetical protein LOC100381734 | UniGene:Zm.103446; Transcribed locus | RefSeq_peptide:NP_001168011; hypothetical protein LOC100381734 | RefSeq_dna:NM_001174540; hypothetical protein LOC100381734 (LOC100381734) mRNA | GO:0055085; transmembrane transport | EntrezGene:100381734; hypothetical protein LOC100381734
GRMZM2G176780_T02	transport.sugars	carbohydrate transporter/ sugar porter/ transporter, putative, expressed	AT1G78130.1	UNE2 (unfertilized embryo sac 2); carbohydrate transmembrane transporter/ sugar:hydrogen symporter	1.225370848	3.528956806	0.970093048	0.520195617	Uniprot/SPTREMBL:C0P7V1; Putative uncharacterized protein | UniGene:Zm.153803; TSA: Zea mays contig36496 mRNA sequence | GO:0055085; transmembrane transport | GO:0016020; membrane | GO:0006810; transport | GO:0005215; transporter activity
GRMZM2G176780_T01	transport.sugars	carbohydrate transporter/ sugar porter/ transporter, putative, expressed	AT1G78130.1	UNE2 (unfertilized embryo sac 2); carbohydrate transmembrane transporter/ sugar:hydrogen symporter	1.225370848	3.528956806	0.970093048	0.520195617	RefSeq_peptide:NP_001151945; carbohydrate transporter/ sugar porter/ transporter | UniGene:Zm.153803; TSA: Zea mays contig36496 mRNA sequence | UniGene:Zm.75920; Carbohydrate transporter/ sugar porter/ transporter | Uniprot/SPTREMBL:B6U6X3; Carbohydrate transporter/ sugar porter/ transporter | RefSeq_dna:NM_001158473; carbohydrate transporter/ sugar porter/ transporter (LOC100285582) mRNA | GO:00…
GRMZM2G081589_T01	transport.sugars.sucrose	sucrose transporter BoSUT1, putative, expressed	AT2G02860.1	SUT2 (SUCROSE TRANSPORTER 2); carbohydrate transmembrane transporter/ sucrose transmembrane transporter/ sucrose:hydrogen symporter/ sugar:hydrogen symporter	1.559384422	5.803714033	0.621815996	0.160056972	Uniprot/SPTREMBL:B6T7Q1; Sucrose transporter BoSUT1 | Uniprot/SPTREMBL:B4FT41; Putative uncharacterized protein | Uniprot/SPTREMBL:B4FBG2; Putative uncharacterized protein | UniGene:Zm.34998; Hypothetical protein LOC100273131 | RefSeq_peptide:NP_001141050; hypothetical protein LOC100273131 | RefSeq_dna:NM_001147578; hypothetical protein LOC100273131 (LOC100273131) mRNA | GO:0055085; transmembrane…
GRMZM2G113911_T02	transport.unspecified anions	chloride channel protein CLC-f, putative, expressed	AT1G55620.2	CLC-F (CHLORIDE CHANNEL F); ion channel/ voltage-gated chloride channel	8.794378003	13.37742644	7.252675232	6.847483735	Uniprot/SPTREMBL:B7ZWZ3; Putative uncharacterized protein | UniGene:Zm.129380; Clone 404019 mRNA sequence | UniGene:Zm.1191; Hypothetical protein LOC100279218 | RefSeq_peptide:NP_001145714; hypothetical protein LOC100279218 | RefSeq_dna:NM_001152242; hypothetical protein LOC100279218 (LOC100279218) mRNA | GO:0055085; transmembrane transport | GO:0016020; membrane | GO:0006821; chloride transport …
GRMZM2G028914_T01	not assigned	retrotransposon protein, putative, unclassified	AT5G10490.2	MSL2 (MscS-LIKE 2); ion channel	10.79176994	38.69123561	34.29062973	22.62819951	UniGene:Zm.64786; TSA: Zea mays contig03439 mRNA sequence | UniGene:Zm.59859; Transcribed locus | UniGene:Zm.25268; Clone 1522265 mRNA sequence | GO:0055085; transmembrane transport | GO:0016020; membrane | GO:0005524; ATP binding
GRMZM2G028914_T02	not assigned	retrotransposon protein, putative, unclassified	AT5G10490.2	MSL2 (MscS-LIKE 2); ion channel	10.79176994	38.69123561	34.29062973	22.62819951	GO:0055085; transmembrane transport | GO:0016020; membrane | GO:0005524; ATP binding
GRMZM2G035709_T01	not assigned	L-2-hydroxyglutarate dehydrogenase, mitochondrial precursor, putative, expressed	AT3G56840.1	FAD-dependent oxidoreductase family protein	3.50441882	13.47840467	7.621178695	6.518127698	GO:0055114; oxidation reduction | GO:0016491; oxidoreductase activity | GO:0009331; glycerol-3-phosphate dehydrogenase complex | GO:0008324; cation transmembrane transporter activity | GO:0006813; potassium ion transport | GO:0006072; glycerol-3-phosphate metabolic process | GO:0004368; glycerol-3-phosphate dehydrogenase activity
GRMZM2G123652_T02	not assigned	saccharopine dehydrogenase and related proteins, putative, expressed	AT1G50450.1	binding / catalytic	18.82737634	93.27389634	115.7834433	74.25630897	UniGene:Zm.43450; TSA: Zea mays contig38204 mRNA sequence | GO:0008324; cation transmembrane transporter activity | GO:0006813; potassium ion transport
GRMZM2G160430_T04	not assigned	solute carrier family 2, facilitated glucose transporter member 8, putative, expressed	AT1G75220.1	integral membrane protein, putative	2.144227042	13.01157271	6.244365771	5.84835839	GO:0055085; transmembrane transport | GO:0046677; response to antibiotic | GO:0022891; substrate-specific transmembrane transporter activity | GO:0016021; integral to membrane | GO:0016020; membrane | GO:0015904; tetracycline transport | GO:0015520; tetracycline:hydrogen antiporter activity | GO:0006810; transport | GO:0005215; transporter activity
GRMZM2G160430_T01	not assigned	solute carrier family 2, facilitated glucose transporter member 8, putative, expressed	AT1G75220.1	integral membrane protein, putative	2.144227042	13.01157271	6.244365771	5.84835839	GO:0046677; response to antibiotic | GO:0055085; transmembrane transport | RefSeq_dna:NM_001148686; hypothetical protein LOC100274323 (LOC100274323) mRNA | RefSeq_peptide:NP_001142158; hypothetical protein LOC100274323 | UniGene:Zm.94635; Hypothetical protein LOC100274323 | Uniprot/SPTREMBL:B4G086; Putative uncharacterized protein | GO:0022891; substrate-specific transmembrane transporter activit…
GRMZM2G005195_T02	protein.degradation.ubiquitin.E3.RING	C2 domain containing protein, expressed	AT1G03370.1	protein binding / zinc ion binding	1.165284231	7.731356732	5.606374645	4.963092833	UniGene:Zm.147010; TSA: Zea mays contig28009 mRNA sequence | GO:0055085; transmembrane transport | GO:0016020; membrane | GO:0006810; transport | GO:0005215; transporter activity
GRMZM2G168200_T01	protein.degradation.ubiquitin.E3.RING	RING-H2 finger protein ATL1Q, putative, expressed	AT1G74410.1	zinc finger (C3HC4-type RING finger) family protein	2.954656568	13.55335301	4.016560281	4.015021501	Uniprot/SPTREMBL:C0P544; Putative uncharacterized protein | UniGene:Zm.85440; Hypothetical protein LOC100382173 | RefSeq_peptide:NP_001168404; hypothetical protein LOC100382173 | RefSeq_dna:NM_001174933; hypothetical protein LOC100382173 (LOC100382173) mRNA | GO:0055085; transmembrane transport | GO:0016020; membrane | GO:0008270; zinc ion binding | GO:0006821; chloride transport | GO:0005515; pr…
GRMZM2G072388_T01	PS.photorespiration.hydroxypyruvate reductase	glyoxylate reductase, putative, expressed	AT2G45630.2	oxidoreductase family protein	0.343782074	10.45128023	2.782838243	2.402528535	UniGene:Zm.131656; TSA: Zea mays contig18135 mRNA sequence | GO:0051287; NAD or NADH binding | GO:0048037; cofactor binding | GO:0016616; oxidoreductase activity acting on the CH-OH group of donors NAD or NADP as acceptor | GO:0008324; cation transmembrane transporter activity | GO:0008152; metabolic process | GO:0006813; potassium ion transport
GRMZM2G169947_T01	RNA.regulation of transcription.bHLH,Basic Helix-Loop-Helix family	NA	0	NA	0.24513479	8.466535665	0.879743689	0.57104328	GO:0055085; transmembrane transport | GO:0045449; regulation of transcription | GO:0030528; transcription regulator activity | GO:0016020; membrane | GO:0006810; transport | GO:0005634; nucleus | GO:0005215; transporter activity
GRMZM2G074103_T01	transport.ABC transporters and multidrug resistance systems	ATPase, coupled to transmembrane movement of substances, putative, expressed	AT1G54350.1	ABC transporter family protein	12.5948168	39.65788244	34.48359325	23.60190983	GO:0042626; ATPase activity coupled to transmembrane movement of substances | GO:0055085; transmembrane transport | MaizeGDB_GenBank:DQ207642; | RefSeq_dna:NM_001152811; LOC100279858 (IDP88) mRNA | RefSeq_peptide:NP_001146283; hypothetical protein LOC100279858 | UniGene:Zm.84802; LOC100279858 | Uniprot/SPTREMBL:B8A0C7; Putative uncharacterized protein | GO:0017111; nucleoside-triphosphatase activ…
GRMZM2G074103_T02	transport.ABC transporters and multidrug resistance systems	ATPase, coupled to transmembrane movement of substances, putative, expressed	AT1G54350.1	ABC transporter family protein	12.5948168	39.65788244	34.48359325	23.60190983	Uniprot/SPTREMBL:B8A0C7; Putative uncharacterized protein | RefSeq_peptide:NP_001146283; hypothetical protein LOC100279858 | GO:0055085; transmembrane transport | GO:0042626; ATPase activity coupled to transmembrane movement of substances | GO:0017111; nucleoside-triphosphatase activity | GO:0016887; ATPase activity | GO:0016021; integral to membrane | GO:0016020; membrane | GO:0006810; transport…
GRMZM2G074103_T03	transport.ABC transporters and multidrug resistance systems	ATPase, coupled to transmembrane movement of substances, putative, expressed	AT1G54350.1	ABC transporter family protein	12.5948168	39.65788244	34.48359325	23.60190983	GO:0017111; nucleoside-triphosphatase activity | GO:0042626; ATPase activity coupled to transmembrane movement of substances | GO:0055085; transmembrane transport | RefSeq_peptide:NP_001146283; hypothetical protein LOC100279858 | Uniprot/SPTREMBL:B8A0C7; Putative uncharacterized protein | GO:0016887; ATPase activity | GO:0016021; integral to membrane | GO:0016020; membrane | GO:0006810; transport…
GRMZM2G074103_T04	transport.ABC transporters and multidrug resistance systems	ATPase, coupled to transmembrane movement of substances, putative, expressed	AT1G54350.1	ABC transporter family protein	12.5948168	39.65788244	34.48359325	23.60190983	GO:0017111; nucleoside-triphosphatase activity | GO:0042626; ATPase activity coupled to transmembrane movement of substances | GO:0055085; transmembrane transport | RefSeq_peptide:NP_001146283; hypothetical protein LOC100279858 | Uniprot/SPTREMBL:B8A0C7; Putative uncharacterized protein | GO:0016887; ATPase activity | GO:0016021; integral to membrane | EntrezGene:100279858; LOC100279858 | GO:0000…
GRMZM2G042313_T01	transport.amino acids	high-affinity cationic amino acid transporter 1, putative, expressed	AT1G58030.1	CAT2 (CATIONIC AMINO ACID TRANSPORTER 2); amino acid transmembrane transporter	17.73719065	43.32107975	21.14317332	20.83991479	GO:0055085; transmembrane transport | GO:0016020; membrane | GO:0015171; amino acid transmembrane transporter activity | GO:0006865; amino acid transport | GO:0006810; transport | GO:0006412; translation | GO:0005840; ribosome | GO:0005622; intracellular | GO:0003735; structural constituent of ribosome
GRMZM2G139920_T01	transport.amino acids	yfnA, putative, expressed	AT1G05940.1	CAT9 (CATIONIC AMINO ACID TRANSPORTER 9); cationic amino acid transmembrane transporter	11.80198377	19.36792356	19.22081646	14.38951019	RefSeq_dna:NM_001174808; hypothetical protein LOC100382043 (LOC100382043) mRNA | RefSeq_peptide:NP_001152066; yfnA | RefSeq_peptide:NP_001168279; hypothetical protein LOC100382043 | UniGene:Zm.125562; YfnA | UniGene:Zm.17216; Hypothetical protein LOC100382043 | Uniprot/SPTREMBL:B6U8D2; YfnA | Uniprot/SPTREMBL:C0P3V4; Putative uncharacterized protein | RefSeq_dna:NM_001158594; yfnA (LOC100285703) …
GRMZM2G301271_T01	transport.amino acids	cationic amino acid transporter, putative	AT3G13620.1	amino acid permease family protein	0.048784876	4.335225698	2.132084705	1.287973529	Uniprot/SPTREMBL:B6TZ59; Cationic amino acid transporter | UniGene:Zm.21537; Cationic amino acid transporter | RefSeq_peptide:NP_001151329; cationic amino acid transporter | RefSeq_dna:NM_001157857; cationic amino acid transporter (LOC100284962) mRNA | GO:0055085; transmembrane transport | GO:0016020; membrane | GO:0015171; amino acid transmembrane transporter activity | GO:0006865; amino acid tr…
GRMZM2G074317_T01	transport.cyclic nucleotide or calcium regulated channels	cyclic nucleotide-gated ion channel 2, putative, expressed	AT5G15410.1	DND1 (DEFENSE NO DEATH 1); calcium channel/ calmodulin binding / cation channel/ cyclic nucleotide binding / intracellular cAMP activated cation channel/ intracellular cyclic nucleotide activated cation channel/ inward rectifier potassium channel	9.421184684	14.80128356	14.8325901	9.97697136	RefSeq_peptide:NP_001140335; hypothetical protein LOC100272382 | UniGene:Zm.145976; TSA: Zea mays contig42578 mRNA sequence | Uniprot/SPTREMBL:B4FNB1; Putative uncharacterized protein | Uniprot/SPTREMBL:C0PLG2; Putative uncharacterized protein | GO:0055085; transmembrane transport | GO:0016020; membrane | GO:0006811; ion transport | GO:0005576; extracellular region | GO:0005216; ion channel activ…
GRMZM2G126582_T01	transport.Major Intrinsic Proteins.NIP	aquaporin NIP-type, putative, expressed	AT4G18910.1	NIP1;2 (NOD26-LIKE INTRINSIC PROTEIN 1;2); arsenite transmembrane transporter/ water channel	0.881458303	8.054990766	1.996451698	1.642690832	Uniprot/SPTREMBL:B6U6X6; Aquaporin NIP-type | UniGene:Zm.81243; Aquaporin NIP-type | RefSeq_peptide:NP_001151947; aquaporin NIP-type | RefSeq_dna:NM_001158475; aquaporin NIP-type (LOC100285584) mRNA | GO:0055085; transmembrane transport | GO:0016021; integral to membrane | GO:0016020; membrane | GO:0006810; transport | GO:0005215; transporter activity | EntrezGene:100285584; aquaporin NIP-type
GRMZM2G040933_T01	transport.metabolite transporters at the envelope membrane	2-oxoglutarate/malate translocator, chloroplast precursor, putative, expressed	AT5G64290.1	DIT2.1 (DICARBOXYLATE TRANSPORT 2.1); oxoglutarate:malate antiporter	21.46759655	78.33814629	129.0444964	48.03724462	RefSeq_peptide:NP_001104868; plastidic general dicarboxylate transporter | UniGene:Zm.17832; Plastidic general dicarboxylate transporter | Uniprot/SPTREMBL:C0PHG6; Putative uncharacterized protein | Uniprot/SPTREMBL:Q768R4; Plastidic general dicarboxylate transporter | Uniprot/SPTREMBL:Q9ZTT4; 2-oxoglutarate/malate translocator Fragment | RefSeq_dna:NM_001111398; plastidic general dicarboxylate t…
GRMZM2G040933_T02	transport.metabolite transporters at the envelope membrane	2-oxoglutarate/malate translocator, chloroplast precursor, putative, expressed	AT5G64290.1	DIT2.1 (DICARBOXYLATE TRANSPORT 2.1); oxoglutarate:malate antiporter	21.46759655	78.33814629	129.0444964	48.03724462	Uniprot/SPTREMBL:Q9ZTT4; 2-oxoglutarate/malate translocator Fragment | Uniprot/SPTREMBL:B7ZXF5; Putative uncharacterized protein | GO:0055085; transmembrane transport | GO:0016020; membrane | GO:0006814; sodium ion transport | GO:0005215; transporter activity
GRMZM2G383088_T01	transport.metabolite transporters at the envelope membrane	2-oxoglutarate/malate translocator (IEP45)	AT5G12860.2	DiT1 (dicarboxylate transporter 1); oxoglutarate:malate antiporter	113.0100783	334.2747743	478.9969589	196.0350102	Uniprot/SPTREMBL:Q768R5; Plastidic 2-oxoglutarate/malate transporter | Uniprot/SPTREMBL:C4JBI8; Putative uncharacterized protein | UniGene:Zm.39040; Plastidic 2-oxoglutarate/malate transporter | UniGene:Zm.100883; Transcribed locus moderately similar to NP_001105570.1 plastidic 2-oxoglutarate/malate transporter [Zea mays] | RefSeq_peptide:NP_001105570; plastidic 2-oxoglutarate/malate transporter …
GRMZM2G102745_T01	transport.metabolite transporters at the mitochondrial membrane	mitochondrial carrier YEL006W, putative, expressed	AT2G47490.1	mitochondrial substrate carrier family protein	9.490715037	20.02320673	11.40488903	10.53986597	GO:0055085; transmembrane transport | GO:0016020; membrane | GO:0006810; transport | GO:0005488; binding
GRMZM2G102745_T02	transport.metabolite transporters at the mitochondrial membrane	mitochondrial carrier YEL006W, putative, expressed	AT2G47490.1	mitochondrial substrate carrier family protein	9.490715037	20.02320673	11.40488903	10.53986597	GO:0055085; transmembrane transport | GO:0016020; membrane | GO:0006810; transport | GO:0005743; mitochondrial inner membrane | GO:0005488; binding
GRMZM2G102745_T03	transport.metabolite transporters at the mitochondrial membrane	mitochondrial carrier YEL006W, putative, expressed	AT2G47490.1	mitochondrial substrate carrier family protein	9.490715037	20.02320673	11.40488903	10.53986597	GO:0055085; transmembrane transport | GO:0016020; membrane | GO:0006839; mitochondrial transport | GO:0006810; transport | GO:0005743; mitochondrial inner membrane | GO:0005739; mitochondrion | GO:0005488; binding
GRMZM2G102745_T04	transport.metabolite transporters at the mitochondrial membrane	mitochondrial carrier YEL006W, putative, expressed	AT2G47490.1	mitochondrial substrate carrier family protein	9.490715037	20.02320673	11.40488903	10.53986597	Uniprot/SPTREMBL:B8A1Q4; Putative uncharacterized protein | UniGene:Zm.9717; Hypothetical protein LOC100280066 | RefSeq_peptide:NP_001146478; hypothetical protein LOC100280066 | RefSeq_dna:NM_001153006; hypothetical protein LOC100280066 (LOC100280066) mRNA | GO:0055085; transmembrane transport | GO:0016020; membrane | GO:0006839; mitochondrial transport | GO:0006810; transport | EntrezGene:100280…
GRMZM2G124911_T01	transport.metabolite transporters at the mitochondrial membrane	mitochondrial deoxynucleotide carrier, putative, expressed	AT5G48970.1	mitochondrial substrate carrier family protein	5.489512497	12.28418671	9.149033939	6.472040512	GO:0055085; transmembrane transport | GO:0016020; membrane | GO:0006839; mitochondrial transport | GO:0006810; transport | GO:0005743; mitochondrial inner membrane | GO:0005739; mitochondrion | GO:0005488; binding | GO:0005215; transporter activity
GRMZM2G124911_T02	transport.metabolite transporters at the mitochondrial membrane	mitochondrial deoxynucleotide carrier, putative, expressed	AT5G48970.1	mitochondrial substrate carrier family protein	5.489512497	12.28418671	9.149033939	6.472040512	UniGene:Zm.82364; TSA: Zea mays contig20067 mRNA sequence | GO:0055085; transmembrane transport | GO:0016020; membrane | GO:0006839; mitochondrial transport | GO:0006810; transport | GO:0005743; mitochondrial inner membrane | GO:0005739; mitochondrion | GO:0005488; binding | GO:0005215; transporter activity
GRMZM2G010152_T01	transport.metal	copper-transporting ATPase 3, putative, expressed	AT5G44790.1	RAN1 (RESPONSIVE-TO-ANTAGONIST 1); ATPase, coupled to transmembrane movement of ions, phosphorylative mechanism / copper ion transmembrane transporter	3.439631609	8.095404435	4.722533749	4.078033062	GO:0015662; ATPase activity coupled to transmembrane movement of ions phosphorylative mechanism | GO:0015694; mercury ion transport | GO:0016020; membrane | GO:0016021; integral to membrane | GO:0016820; hydrolase activity acting on acid anhydrides catalyzing transmembrane movement of substances | GO:0030001; metal ion transport | GO:0046872; metal ion binding | GO:0046873; metal ion transmembran…
GRMZM2G067853_T01	transport.metal	cadmium/zinc-transporting ATPase HMA1, chloroplast precursor, putative, expressed	AT4G37270.1	HMA1; ATPase/ cadmium-transporting ATPase/ calcium-transporting ATPase/ copper-exporting ATPase/ zinc transporting ATPase	7.176848819	14.65094955	13.79315977	9.875812635	Uniprot/SPTREMBL:D2XBX8; ATPase cadmium transporter Fragment | GO:0046873; metal ion transmembrane transporter activity | GO:0046872; metal ion binding | GO:0030001; metal ion transport | GO:0016820; hydrolase activity acting on acid anhydrides catalyzing transmembrane movement of substances | GO:0016818; hydrolase activity acting on acid anhydrides in phosphorus-containing anhydrides | GO:001602…
GRMZM2G067853_T02	transport.metal	cadmium/zinc-transporting ATPase HMA1, chloroplast precursor, putative, expressed	AT4G37270.1	HMA1; ATPase/ cadmium-transporting ATPase/ calcium-transporting ATPase/ copper-exporting ATPase/ zinc transporting ATPase	7.176848819	14.65094955	13.79315977	9.875812635	GO:0016820; hydrolase activity acting on acid anhydrides catalyzing transmembrane movement of substances | GO:0030001; metal ion transport | GO:0046872; metal ion binding | GO:0046873; metal ion transmembrane transporter activity | RefSeq_dna:NM_001147972; hypothetical protein LOC100273554 (LOC100273554) mRNA | RefSeq_peptide:NP_001141444; hypothetical protein LOC100273554 | UniGene:Zm.25124; Hyp…
GRMZM2G315931_T01	transport.metal	copper-transporting ATPase PAA1, putative, expressed	AT4G33520.3	PAA1 (P-TYPE ATP-ASE 1); ATPase, coupled to transmembrane movement of ions, phosphorylative mechanism / copper ion transmembrane transporter	18.63456634	44.97468032	27.31532134	21.18613721	GO:0030001; metal ion transport | GO:0046872; metal ion binding | GO:0046873; metal ion transmembrane transporter activity | RefSeq_dna:NM_001174517; hypothetical protein LOC100381708 (LOC100381708) mRNA | RefSeq_peptide:NP_001167988; hypothetical protein LOC100381708 | UniGene:Zm.138052; Hypothetical protein LOC100381708 | UniGene:Zm.79117; Transcribed locus weakly similar to XP_002299685.1 heav…
GRMZM2G031938_T01	transport.misc	transparent testa 12 protein, putative, expressed	AT3G21690.1	MATE efflux family protein	4.309752398	13.76748099	7.013286005	6.173663415	Uniprot/SPTREMBL:B4G1S3; Putative uncharacterized protein | RefSeq_peptide:NP_001142368; hypothetical protein LOC100274540 | RefSeq_dna:NM_001148896; hypothetical protein LOC100274540 (LOC100274540) mRNA | GO:0055085; transmembrane transport | GO:0016020; membrane | GO:0015297; antiporter activity | GO:0015238; drug transmembrane transporter activity | GO:0006855; drug transmembrane transport | E…
GRMZM2G161809_T02	transport.misc	transparent testa 12 protein, putative, expressed	AT3G23560.1	ALF5 (ABERRANT LATERAL ROOT FORMATION 5); antiporter/ drug transporter/ transporter	2.509678169	8.550345655	10.06817777	7.755715659	GO:0055085; transmembrane transport | GO:0016020; membrane | GO:0015297; antiporter activity | GO:0015238; drug transmembrane transporter activity | GO:0006855; drug transmembrane transport
GRMZM2G161809_T01	transport.misc	transparent testa 12 protein, putative, expressed	AT3G23560.1	ALF5 (ABERRANT LATERAL ROOT FORMATION 5); antiporter/ drug transporter/ transporter	2.509678169	8.550345655	10.06817777	7.755715659	Uniprot/SPTREMBL:B6SSG0; Transparent testa 12 protein | UniGene:Zm.87628; Transparent testa 12 protein | RefSeq_peptide:NP_001147516; transparent testa 12 protein | RefSeq_dna:NM_001154044; transparent testa 12 protein (LOC100281125) mRNA | GO:0055085; transmembrane transport | GO:0016020; membrane | GO:0015297; antiporter activity | GO:0015238; drug transmembrane transporter activity | GO:000685…
GRMZM2G120922_T01	transport.peptides and oligopeptides	transposon protein, putative, unclassified, expressed	AT1G65730.1	YSL7 (YELLOW STRIPE LIKE 7); oligopeptide transporter	4.097369615	10.66320017	6.492817208	5.626628408	UniGene:Zm.131119; Transcribed locus strongly similar to XP_002452492.1 hypothetical protein SORBIDRAFT_04g026840 [Sorghum bicolor] | GO:0055085; transmembrane transport
GRMZM2G020766_T01	transport.potassium	potassium transporter 7, putative, expressed	AT2G35060.1	KUP11; potassium ion transmembrane transporter	1.328422487	6.996919097	7.545306428	5.467073422	UniGene:Zm.146490; TSA: Zea mays contig40310 mRNA sequence | UniGene:Zm.145295; TSA: Zea mays contig48421 mRNA sequence | UniGene:Zm.123414; TSA: Zea mays contig03340 mRNA sequence | GO:0016020; membrane | GO:0015079; potassium ion transmembrane transporter activity | GO:0006813; potassium ion transport
GRMZM2G029219_T01	transport.sugars	carbohydrate transporter/ sugar porter/ transporter, putative, expressed	AT3G43790.1	ZIFL2 (ZINC INDUCED FACILITATOR-like 2); carbohydrate transmembrane transporter/ sugar:hydrogen symporter	136.058921	267.964251	267.9401318	254.0433706	Uniprot/SPTREMBL:B6TU20; Carbohydrate transporter/ sugar porter/ transporter | UniGene:Zm.2272; Carbohydrate transporter/ sugar porter/ transporter | RefSeq_peptide:NP_001150835; carbohydrate transporter/ sugar porter/ transporter | RefSeq_dna:NM_001157363; carbohydrate transporter/ sugar porter/ transporter (LOC100284468) mRNA | GO:0055085; transmembrane transport | GO:0046677; response to antib…
GRMZM2G046681_T03	transport.sugars	sialin, putative, expressed	AT4G00370.1	ANTR2; inorganic phosphate transmembrane transporter/ organic anion transmembrane transporter	36.66045461	141.6244857	117.3336149	88.41678851	GO:0055085; transmembrane transport | UniGene:Zm.152862; TSA: Zea mays contig00607 mRNA sequence
GRMZM2G046681_T01	transport.sugars	sialin, putative, expressed	AT4G00370.1	ANTR2; inorganic phosphate transmembrane transporter/ organic anion transmembrane transporter	36.66045461	141.6244857	117.3336149	88.41678851	Uniprot/SPTREMBL:B4F9Q7; Putative uncharacterized protein | UniGene:Zm.152862; TSA: Zea mays contig00607 mRNA sequence | RefSeq_peptide:NP_001130577; hypothetical protein LOC100191676 | GO:0055085; transmembrane transport | EntrezGene:100191676; LOC100191676
GRMZM2G046681_T02	transport.sugars	sialin, putative, expressed	AT4G00370.1	ANTR2; inorganic phosphate transmembrane transporter/ organic anion transmembrane transporter	36.66045461	141.6244857	117.3336149	88.41678851	Uniprot/SPTREMBL:B4F9Q7; Putative uncharacterized protein | UniGene:Zm.85174; LOC100191676 | UniGene:Zm.152862; TSA: Zea mays contig00607 mRNA sequence | RefSeq_peptide:NP_001130577; hypothetical protein LOC100191676 | RefSeq_dna:NM_001137105; LOC100191676 (pco061977) mRNA | GO:0055085; transmembrane transport | EntrezGene:100191676; LOC100191676
GRMZM2G079342_T02	transport.sugars	sugar transport protein 5, putative, expressed	AT1G34580.1	monosaccharide transporter, putative	1.71040823	58.2614154	10.02920418	2.83019488	GO:0055085; transmembrane transport | GO:0022891; substrate-specific transmembrane transporter activity | GO:0016020; membrane
GRMZM2G079342_T01	transport.sugars	sugar transport protein 5, putative, expressed	AT1G34580.1	monosaccharide transporter, putative	1.71040823	58.2614154	10.02920418	2.83019488	Uniprot/SPTREMBL:B6TEX4; Sugar transport protein 5 | UniGene:Zm.30492; Sugar transport protein 5 | UniGene:Zm.146942; TSA: Zea mays contig28263 mRNA sequence | RefSeq_peptide:NP_001149506; sugar transport protein 5 | RefSeq_dna:NM_001156034; sugar transport protein 5 (LOC100283132) mRNA | GO:0055085; transmembrane transport | GO:0022891; substrate-specific transmembrane transporter activity | GO:…
GRMZM2G109221_T01	transport.sugars	solute carrier family 2, facilitated glucose transporter member 8, putative, expressed	AT2G48020.2	sugar transporter, putative	1.880333815	7.56814173	9.444581387	6.690682171	Uniprot/SPTREMBL:C0HEX0; Putative uncharacterized protein | UniGene:Zm.78792; Hypothetical protein LOC100304336 | RefSeq_peptide:NP_001159247; hypothetical protein LOC100304336 | RefSeq_dna:NM_001165775; hypothetical protein LOC100304336 (LOC100304336) mRNA | GO:0055085; transmembrane transport | GO:0022891; substrate-specific transmembrane transporter activity | GO:0016021; integral to membrane …
GRMZM2G080178_T01	transport.sulphate	sulfate transporter 1.2, putative, expressed	AT1G22150.1	SULTR1;3; sulfate transmembrane transporter	2.851439311	13.27033022	13.63087922	3.069118188	RefSeq_dna:NM_001176279; hypothetical protein LOC100383631 (LOC100383631) mRNA | RefSeq_peptide:NP_001132356; hypothetical protein LOC100193800 | RefSeq_peptide:NP_001169750; hypothetical protein LOC100383631 | UniGene:Zm.156849; Hypothetical protein LOC100193800 | Uniprot/SPTREMBL:B4FGC4; Putative uncharacterized protein | Uniprot/SPTREMBL:B6UC24; Sulfate transporter 1.2 | Uniprot/SPTREMBL:C0PHW…
GRMZM2G080178_T02	transport.sulphate	sulfate transporter 1.2, putative, expressed	AT1G22150.1	SULTR1;3; sulfate transmembrane transporter	2.851439311	13.27033022	13.63087922	3.069118188	RefSeq_dna:NM_001176279; hypothetical protein LOC100383631 (LOC100383631) mRNA | RefSeq_peptide:NP_001132356; hypothetical protein LOC100193800 | RefSeq_peptide:NP_001169750; hypothetical protein LOC100383631 | UniGene:Zm.156849; Hypothetical protein LOC100193800 | Uniprot/SPTREMBL:B4FGC4; Putative uncharacterized protein | Uniprot/SPTREMBL:B6UC24; Sulfate transporter 1.2 | Uniprot/SPTREMBL:C0PHW…
GRMZM2G113409_T01	transport.unspecified anions	chloride channel protein CLC-c, putative, expressed	AT5G49890.1	CLC-C (CHLORIDE CHANNEL C); anion channel/ voltage-gated chloride channel	34.51746085	79.49172567	47.63718369	39.79878412	Uniprot/SPTREMBL:Q84QC8; Chloride channel | UniGene:Zm.8903; LOC542114 | RefSeq_peptide:NP_001105216; LOC542114 | RefSeq_dna:NM_001111746; LOC542114 (pco116691) mRNA | GO:0055085; transmembrane transport | GO:0016020; membrane | GO:0006821; chloride transport | GO:0005247; voltage-gated chloride channel activity | GO:0005216; ion channel activity | GenBank:AY236970; product:chloride channel | Ent…
GRMZM2G333833_T01	transport.unspecified anions	chloride channel protein CLC-e, putative, expressed	AT4G35440.1	CLC-E (CHLORIDE CHANNEL E); ion channel/ voltage-gated chloride channel	1.85414222	11.9633791	11.51443535	8.733255135	GO:0055085; transmembrane transport | GO:0016020; membrane | GO:0006821; chloride transport | GO:0005247; voltage-gated chloride channel activity | GO:0005216; ion channel activity
GRMZM2G135056_T01	development.unspecified	nodulin-like protein, putative, expressed	AT3G01930.2	nodulin family protein	0.355203474	7.714914495	12.56425011	8.582307958	UniGene:Zm.80880; Nodulin-like protein | RefSeq_dna:NM_001158631; nodulin-like protein (LOC100285740) mRNA | GO:0055085; transmembrane transport | GO:0022891; substrate-specific transmembrane transporter activity | GO:0016020; membrane
GRMZM2G136523_T01	development.unspecified	nodulin-like protein, putative, expressed	AT3G01930.2	nodulin family protein	0.355203474	7.714914495	12.50508997	8.71031113	UniGene:Zm.80880; Nodulin-like protein | RefSeq_dna:NM_001158631; nodulin-like protein (LOC100285740) mRNA | GO:0055085; transmembrane transport | GO:0022891; substrate-specific transmembrane transporter activity | GO:0016020; membrane
GRMZM2G162078_T01	glycolysis.G6PIsomerase	glucose-6-phosphate isomerase, cytosolic B, putative, expressed	AT5G42740.1	glucose-6-phosphate isomerase, cytosolic (PGIC)	1.116447225	5.028580428	9.787364652	7.702286145	GO:0055085; transmembrane transport | GO:0016020; membrane | GO:0006810; transport | GO:0006096; glycolysis | GO:0006094; gluconeogenesis | GO:0005215; transporter activity | GO:0004347; glucose-6-phosphate isomerase activity
GRMZM2G162078_T02	glycolysis.G6PIsomerase	glucose-6-phosphate isomerase, cytosolic B, putative, expressed	AT5G42740.1	glucose-6-phosphate isomerase, cytosolic (PGIC)	1.116447225	5.028580428	9.787364652	7.702286145	GO:0055085; transmembrane transport | GO:0016020; membrane | GO:0006810; transport | GO:0006096; glycolysis | GO:0006094; gluconeogenesis | GO:0005215; transporter activity | GO:0004347; glucose-6-phosphate isomerase activity
GRMZM2G098011_T02	major CHO metabolism.degradation.starch.transporter	arabinose-proton symporter, putative, expressed	AT5G16150.3	PGLCT (PLASTIDIC GLC TRANSLOCATOR); carbohydrate transmembrane transporter/ sugar:hydrogen symporter	6.553037175	24.38032973	43.21091988	32.94842406	Uniprot/SPTREMBL:B8A2T1; Putative uncharacterized protein | GO:0055085; transmembrane transport | GO:0022891; substrate-specific transmembrane transporter activity | GO:0016021; integral to membrane | GO:0016020; membrane | GO:0006810; transport | GO:0005215; transporter activity
GRMZM2G098011_T01	major CHO metabolism.degradation.starch.transporter	arabinose-proton symporter, putative, expressed	AT5G16150.3	PGLCT (PLASTIDIC GLC TRANSLOCATOR); carbohydrate transmembrane transporter/ sugar:hydrogen symporter	6.553037175	24.38032973	43.21091988	32.94842406	Uniprot/SPTREMBL:B3GS76; Hexose transporter | UniGene:Zm.99270; Hexose transporter | RefSeq_peptide:NP_001123601; hexose transporter | RefSeq_dna:NM_001130129; hexose transporter (LOC100170248) mRNA | GO:0055085; transmembrane transport | GO:0022891; substrate-specific transmembrane transporter activity | GO:0016021; integral to membrane | GO:0016020; membrane | GO:0006810; transport | GO:0005215…
GRMZM2G113332_T01	metal handling.binding, chelation and storage	heavy metal-associated domain containing protein, expressed	AT3G56240.1	CCH (COPPER CHAPERONE); copper chaperone	24.2777725	119.8811078	158.0297656	126.5482584	RefSeq_dna:NM_001150042; hypothetical protein LOC100276197 (LOC100276197) mRNA | RefSeq_peptide:NP_001143514; hypothetical protein LOC100276197 | Uniprot/SPTREMBL:B6SHX8; Putative uncharacterized protein | Uniprot/SPTREMBL:B6SQL3; Putative uncharacterized protein | Uniprot/SPTREMBL:B6ST82; Putative uncharacterized protein | GO:0050826; response to freezing | GO:0050825; ice binding | GO:0046872; …
GRMZM2G098679_T01	not assigned	solute carrier family 2, facilitated glucose transporter member 8, putative, expressed	AT1G75220.1	integral membrane protein, putative	0.5405572	7.881002747	27.85468357	23.0948023	Uniprot/SPTREMBL:B6TZY0; Solute carrier family 2 facilitated glucose transporter member 8 | UniGene:Zm.138407; Solute carrier family 2 facilitated glucose transporter member 8 | UniGene:Zm.104413; Transcribed locus | RefSeq_peptide:NP_001159053; solute carrier family 2 facilitated glucose transporter member 8 | RefSeq_dna:NM_001165581; solute carrier family 2 facilitated glucose transporter membe…
GRMZM2G098679_T02	not assigned	solute carrier family 2, facilitated glucose transporter member 8, putative, expressed	AT1G75220.1	integral membrane protein, putative	0.5405572	7.881002747	27.85468357	23.0948023	UniGene:Zm.104413; Transcribed locus | GO:0055085; transmembrane transport | GO:0046677; response to antibiotic | GO:0022891; substrate-specific transmembrane transporter activity | GO:0016021; integral to membrane | GO:0016020; membrane | GO:0015904; tetracycline transport | GO:0015520; tetracycline:hydrogen antiporter activity | GO:0006810; transport | GO:0005215; transporter activity
GRMZM2G098679_T03	not assigned	solute carrier family 2, facilitated glucose transporter member 8, putative, expressed	AT1G75220.1	integral membrane protein, putative	0.5405572	7.881002747	27.85468357	23.0948023	GO:0022891; substrate-specific transmembrane transporter activity | GO:0046677; response to antibiotic | GO:0055085; transmembrane transport | UniGene:Zm.104413; Transcribed locus | GO:0016021; integral to membrane | GO:0016020; membrane | GO:0015904; tetracycline transport | GO:0015520; tetracycline:hydrogen antiporter activity | GO:0006810; transport | GO:0005215; transporter activity
GRMZM2G072071_T01	transport.ABC transporters and multidrug resistance systems	ATP-binding cassette sub-family B member 10, mitochondrial precursor, putative, expressed	AT5G39040.1	ATTAP2; ATPase, coupled to transmembrane movement of substances / transporter	12.46657252	30.67048651	59.28812389	54.23828504	RefSeq_dna:NM_001158302; ATP-binding cassette sub-family B member 10 (LOC100285409) mRNA | RefSeq_peptide:NP_001151774; ATP-binding cassette sub-family B member 10 | UniGene:Zm.29255; ATP-binding cassette sub-family B member 10 | Uniprot/SPTREMBL:B6U4J2; ATP-binding cassette sub-family B member 10 | Uniprot/SPTREMBL:B8A1E3; Putative uncharacterized protein | Uniprot/SPTREMBL:B8A1R5; Putative unch…
GRMZM2G077361_T01	transport.ABC transporters and multidrug resistance systems	ATNAP8, putative, expressed	AT4G25450.3	ATNAP8; ATPase, coupled to transmembrane movement of substances / transporter	1.419539921	15.93425495	29.47998679	28.61509006	UniGene:Zm.64531; TSA: Zea mays contig47452 mRNA sequence | GO:0055085; transmembrane transport | GO:0042626; ATPase activity coupled to transmembrane movement of substances | GO:0017111; nucleoside-triphosphatase activity | GO:0016887; ATPase activity | GO:0016021; integral to membrane | GO:0006810; transport | GO:0005524; ATP binding | GO:0000166; nucleotide binding
GRMZM2G375807_T01	transport.ABC transporters and multidrug resistance systems	PXA1, putative, expressed	AT4G39850.1	PXA1 (PEROXISOMAL ABC TRANSPORTER 1); ATPase, coupled to transmembrane movement of substances	2.191258988	10.03744445	15.89770833	14.41551261	UniGene:Zm.16447; Transcribed locus strongly similar to XP_002457002.1 hypothetical protein SORBIDRAFT_03g047010 [Sorghum bicolor] | GO:0055085; transmembrane transport | GO:0042626; ATPase activity coupled to transmembrane movement of substances | GO:0017111; nucleoside-triphosphatase activity | GO:0016887; ATPase activity | GO:0016021; integral to membrane | GO:0016020; membrane | GO:0006810; t…
GRMZM2G432390_T01	transport.ABC transporters and multidrug resistance systems	ATP-binding cassette sub-family B member 8, mitochondrial precursor, putative, expressed	AT1G70610.1	ATTAP1; ATPase, coupled to transmembrane movement of substances / transporter	9.974137163	41.54792936	58.63133027	48.70217807	Uniprot/SPTREMBL:B6U3G3; Putative uncharacterized protein | UniGene:Zm.4236; TSA: Zea mays contig43839 mRNA sequence | UniGene:Zm.155659; TSA: Zea mays contig35247 mRNA sequence | UniGene:Zm.154050; TSA: Zea mays contig35319 mRNA sequence | UniGene:Zm.102444; TSA: Zea mays contig43376 mRNA sequence | GO:0055085; transmembrane transport | GO:0042626; ATPase activity coupled to transmembrane moveme…
GRMZM2G086258_T01	transport.metabolite transporters at the envelope membrane	2-oxoglutarate/malate translocator, chloroplast precursor, putative, expressed	AT5G64290.1	DIT2.1 (DICARBOXYLATE TRANSPORT 2.1); oxoglutarate:malate antiporter	22.98778936	95.85534728	191.2352691	121.2683324	GO:0055085; transmembrane transport | GO:0016021; integral to membrane | GO:0016020; membrane | GO:0015746; citrate transport | GO:0015137; citrate transmembrane transporter activity | GO:0006814; sodium ion transport | GO:0005215; transporter activity
GRMZM2G086258_T02	transport.metabolite transporters at the envelope membrane	2-oxoglutarate/malate translocator, chloroplast precursor, putative, expressed	AT5G64290.1	DIT2.1 (DICARBOXYLATE TRANSPORT 2.1); oxoglutarate:malate antiporter	22.98778936	95.85534728	191.2352691	121.2683324	GO:0016021; integral to membrane | GO:0055085; transmembrane transport | RefSeq_dna:NM_001111399; plastidic general dicarboxylate transporter (pDCT2) mRNA | RefSeq_peptide:NP_001104869; plastidic general dicarboxylate transporter | UniGene:Zm.13059; Plastidic general dicarboxylate transporter | Uniprot/SPTREMBL:B4G1Q8; Putative uncharacterized protein | Uniprot/SPTREMBL:Q768R2; Plastidic general …
GRMZM2G174107_T01	transport.metabolite transporters at the envelope membrane	triose phosphate/phosphate translocator, non-green plastid,chloroplast precursor, putative, expressed	AT5G33320.1	CUE1 (CAB UNDEREXPRESSED 1); antiporter/ triose-phosphate transmembrane transporter	120.0816881	813.2954824	1249.93045	815.0984333	Uniprot/SPTREMBL:C0P317; Putative uncharacterized protein | Uniprot/SPTREMBL:B6TKB3; Triose phosphate/phosphate translocator non-green plastidchloroplast | UniGene:Zm.87975; Triose phosphate/phosphate translocator non-green plastidchloroplast | RefSeq_peptide:NP_001150021; triose phosphate/phosphate translocator non-green plastidchloroplast | RefSeq_dna:NM_001156549; triose phosphate/phosphate tr…
GRMZM2G003033_T01	transport.metabolite transporters at the mitochondrial membrane	expressed protein	AT2G35800.1	mitochondrial substrate carrier family protein	6.885024807	13.63149843	18.42926721	17.70368104	Uniprot/SPTREMBL:C0HHD7; Putative uncharacterized protein | UniGene:Zm.138283; Hypothetical protein LOC100381606 | RefSeq_peptide:NP_001167895; hypothetical protein LOC100381606 | RefSeq_dna:NM_001174424; hypothetical protein LOC100381606 (LOC100381606) mRNA | GO:0055085; transmembrane transport | GO:0016020; membrane | GO:0006810; transport | GO:0005743; mitochondrial inner membrane | GO:0005509…
GRMZM2G041831_T03	transport.metabolite transporters at the mitochondrial membrane	calcium-binding mitochondrial carrier F55A11.4, putative, expressed	AT5G51050.1	mitochondrial substrate carrier family protein	7.736087314	13.9381237	19.49995926	18.73077065	Uniprot/SPTREMBL:C0PEQ3; Putative uncharacterized protein | GO:0055085; transmembrane transport | GO:0016020; membrane | GO:0006839; mitochondrial transport | GO:0006810; transport | GO:0005743; mitochondrial inner membrane | GO:0005739; mitochondrion | GO:0005509; calcium ion binding | GO:0005488; binding | GO:0005215; transporter activity
GRMZM2G041831_T01	transport.metabolite transporters at the mitochondrial membrane	calcium-binding mitochondrial carrier F55A11.4, putative, expressed	AT5G51050.1	mitochondrial substrate carrier family protein	7.736087314	13.9381237	19.49995926	18.73077065	EntrezGene:100279872; hypothetical protein LOC100279872 | Uniprot/SPTREMBL:B8A0E7; Putative uncharacterized protein | UniGene:Zm.68103; Hypothetical protein LOC100279872 | UniGene:Zm.151271; TSA: Zea mays contig08337 mRNA sequence | RefSeq_peptide:NP_001146297; hypothetical protein LOC100279872 | GO:0055085; transmembrane transport | GO:0016020; membrane | GO:0006839; mitochondrial transport | GO…
GRMZM2G041831_T02	transport.metabolite transporters at the mitochondrial membrane	calcium-binding mitochondrial carrier F55A11.4, putative, expressed	AT5G51050.1	mitochondrial substrate carrier family protein	7.736087314	13.9381237	19.49995926	18.73077065	GO:0016020; membrane | GO:0055085; transmembrane transport | RefSeq_peptide:NP_001146297; hypothetical protein LOC100279872 | UniGene:Zm.151271; TSA: Zea mays contig08337 mRNA sequence | Uniprot/SPTREMBL:B8A0E7; Putative uncharacterized protein | GO:0006839; mitochondrial transport | GO:0006810; transport | GO:0005743; mitochondrial inner membrane | EntrezGene:100279872; hypothetical protein LOC1…
GRMZM2G041831_T06	transport.metabolite transporters at the mitochondrial membrane	calcium-binding mitochondrial carrier F55A11.4, putative, expressed	AT5G51050.1	mitochondrial substrate carrier family protein	7.736087314	13.9381237	19.49995926	18.73077065	GO:0016020; membrane | GO:0055085; transmembrane transport | RefSeq_dna:NM_001152825; hypothetical protein LOC100279872 (LOC100279872) mRNA | RefSeq_peptide:NP_001146297; hypothetical protein LOC100279872 | UniGene:Zm.151271; TSA: Zea mays contig08337 mRNA sequence | Uniprot/SPTREMBL:B8A0E7; Putative uncharacterized protein | GO:0006839; mitochondrial transport | GO:0006810; transport | GO:000574…
GRMZM2G143512_T01	transport.metal	copper-transporting ATPase 3, putative, expressed	AT1G63440.1	HMA5 (HEAVY METAL ATPASE 5); ATPase, coupled to transmembrane movement of ions, phosphorylative mechanism	0.979997683	4.441616679	8.19115681	6.192939445	GO:0016020; membrane | GO:0016021; integral to membrane | GO:0016820; hydrolase activity acting on acid anhydrides catalyzing transmembrane movement of substances | GO:0030001; metal ion transport | GO:0046872; metal ion binding | GO:0046873; metal ion transmembrane transporter activity | UniGene:Zm.150156; TSA: Zea mays contig13596 mRNA sequence | UniGene:Zm.153717; TSA: Zea mays contig36974 mRN…
GRMZM2G156599_T01	transport.metal	transposon protein, putative, unclassified, expressed	AT5G24380.1	YSL2 (YELLOW STRIPE LIKE 2); oligopeptide transporter	0.005973711	0.290139931	5.505419353	0.811755136	Uniprot/SWISSPROT:Q9AY27; Iron-phytosiderophore transporter yellow stripe 1 (ZmYS1) | UniGene:Zm.582; Yellow stripe1 | RefSeq_peptide:NP_001104952; iron-phytosiderophore transporter yellow stripe 1 | RefSeq_dna:NM_001111482; yellow stripe1 (ys1) mRNA | GO:0055085; transmembrane transport | GenBank:AF186234; product:iron-phytosiderophore transporter protein yellow stripe 1 | EntrezGene:541800; yel…
GRMZM2G379686_T01	transport.metal	solute carrier family 30, putative, expressed	AT1G51610.1	cation efflux family protein / metal tolerance protein, putative (MTPc4)	2.832935719	13.89300399	29.78338078	28.70394457	GO:0006812; cation transport | GO:0008324; cation transmembrane transporter activity | GO:0016020; membrane | GO:0055085; transmembrane transport | UniGene:Zm.47169; Transcribed locus
GRMZM2G010765_T02	transport.misc	transparent testa 12 protein, putative, expressed	AT5G52450.1	MATE efflux protein-related	0.732205415	3.358711323	11.40443762	9.836075598	Uniprot/SPTREMBL:C0P9Z9; Putative uncharacterized protein | GO:0055085; transmembrane transport | GO:0016020; membrane | GO:0015297; antiporter activity | GO:0015238; drug transmembrane transporter activity | GO:0006855; drug transmembrane transport
GRMZM2G010765_T01	transport.misc	transparent testa 12 protein, putative, expressed	AT5G52450.1	MATE efflux protein-related	0.732205415	3.358711323	11.40443762	9.836075598	Uniprot/SPTREMBL:C0P9Z9; Putative uncharacterized protein | Uniprot/SPTREMBL:B4F9S3; Putative uncharacterized proteinTransparent testa 12 protein ; | RefSeq_peptide:NP_001130588; hypothetical protein LOC100191687 | RefSeq_dna:NM_001137116; hypothetical protein LOC100191687 (LOC100191687) mRNA | GO:0055085; transmembrane transport | GO:0016020; membrane | GO:0015297; antiporter activity | GO:00152…
GRMZM2G060742_T05	transport.misc	citrate transporter family protein, expressed	AT1G02260.1	transmembrane protein, putative	3.037815432	82.56957272	166.231351	145.3681848	GO:0055085; transmembrane transport | GO:0016021; integral to membrane | GO:0015746; citrate transport | GO:0015137; citrate transmembrane transporter activity | GO:0015105; arsenite transmembrane transporter activity
GRMZM2G060742_T01	transport.misc	citrate transporter family protein, expressed	AT1G02260.1	transmembrane protein, putative	3.037815432	82.56957272	166.231351	145.3681848	Uniprot/SPTREMBL:B6ST51; Citrate transporter family protein | Uniprot/SPTREMBL:B6SSI8; Citrate transporter family protein | Uniprot/SPTREMBL:B4FXV2; Putative uncharacterized protein | RefSeq_peptide:NP_001147885; citrate transporter family protein | GO:0055085; transmembrane transport | GO:0016021; integral to membrane | GO:0015746; citrate transport | GO:0015137; citrate transmembrane transporte…
GRMZM2G060742_T02	transport.misc	citrate transporter family protein, expressed	AT1G02260.1	transmembrane protein, putative	3.037815432	82.56957272	166.231351	145.3681848	RefSeq_peptide:NP_001147885; citrate transporter family protein | UniGene:Zm.30909; Citrate transporter family protein | Uniprot/SPTREMBL:B4FXV2; Putative uncharacterized protein | Uniprot/SPTREMBL:B6SSI8; Citrate transporter family protein | Uniprot/SPTREMBL:B6ST51; Citrate transporter family protein | RefSeq_dna:NM_001154413; citrate transporter family protein (LOC100281495) mRNA | GO:0055085; …
GRMZM2G060742_T03	transport.misc	citrate transporter family protein, expressed	AT1G02260.1	transmembrane protein, putative	3.037815432	82.56957272	166.231351	145.3681848	Uniprot/SPTREMBL:B6ST51; Citrate transporter family protein | Uniprot/SPTREMBL:B6SSI8; Citrate transporter family protein | Uniprot/SPTREMBL:B4FXV2; Putative uncharacterized protein | RefSeq_peptide:NP_001147885; citrate transporter family protein | GO:0055085; transmembrane transport | GO:0016021; integral to membrane | GO:0015746; citrate transport | GO:0015137; citrate transmembrane transporte…
GRMZM2G060742_T04	transport.misc	citrate transporter family protein, expressed	AT1G02260.1	transmembrane protein, putative	3.037815432	82.56957272	166.231351	145.3681848	RefSeq_peptide:NP_001147885; citrate transporter family protein | Uniprot/SPTREMBL:B4FXV2; Putative uncharacterized protein | Uniprot/SPTREMBL:B6SSI8; Citrate transporter family protein | Uniprot/SPTREMBL:B6ST51; Citrate transporter family protein | GO:0055085; transmembrane transport | GO:0016021; integral to membrane | GO:0015746; citrate transport | GO:0015137; citrate transmembrane transporte…
GRMZM2G073429_T01	transport.misc	biopterin transport-related protein BT1, putative, expressed	AT2G32040.1	integral membrane transporter family protein	2.718723238	25.17314511	40.70986875	36.27956189	GO:0055085; transmembrane transport | UniGene:Zm.23563; TSA: Zea mays contig11836 mRNA sequence
GRMZM2G347174_T02	transport.misc	citrate transporter family protein, expressed	AT1G02260.1	transmembrane protein, putative	0.206394142	3.882928632	4.32355536	4.16690437	GO:0055085; transmembrane transport | GO:0016021; integral to membrane | GO:0015746; citrate transport | GO:0015137; citrate transmembrane transporter activity | GO:0015105; arsenite transmembrane transporter activity
GRMZM2G421491_T01	transport.peptides and oligopeptides	oligopeptide transporter 3, putative, expressed	AT4G16370.1	ATOPT3 (OLIGOPEPTIDE TRANSPORTER); oligopeptide transporter	8.157159885	12.29697108	34.91587095	33.35415455	Uniprot/SPTREMBL:Q6TUA0; Putative glutathione transporter Fragment | Uniprot/SPTREMBL:B8YPX7; Glutathione transporter | UniGene:Zm.16913; GT1 protein | GO:0055085; transmembrane transport | GenBank:FJ573212; product:glutathione transporter
GRMZM2G092793_T01	transport.phosphate	sialin, putative, expressed	AT2G29650.1	PHT4;1; carbohydrate transmembrane transporter/ inorganic diphosphate transmembrane transporter/ inorganic phosphate transmembrane transporter/ organic anion transmembrane transporter/ sugar:hydrogen symporter	8.129338282	49.17124695	90.68615636	78.0510628	Uniprot/SPTREMBL:B6SX01; Sialin | RefSeq_peptide:NP_001148011; sialin | RefSeq_dna:NM_001154539; sialin (LOC100281620) mRNA | GO:0055085; transmembrane transport | EntrezGene:100281620; sialin
GRMZM2G092793_T02	transport.phosphate	sialin, putative, expressed	AT2G29650.1	PHT4;1; carbohydrate transmembrane transporter/ inorganic diphosphate transmembrane transporter/ inorganic phosphate transmembrane transporter/ organic anion transmembrane transporter/ sugar:hydrogen symporter	8.129338282	49.17124695	90.68615636	78.0510628	GO:0055085; transmembrane transport
GRMZM2G326707_T01	transport.phosphate	inorganic phosphate transporter 1-4, putative, expressed	AT2G38940.1	ATPT2 (ARABIDOPSIS THALIANA PHOSPHATE TRANSPORTER 2); carbohydrate transmembrane transporter/ inorganic phosphate transmembrane transporter/ phosphate transmembrane transporter/ sugar:hydrogen symporter	0.034445953	2.081982338	4.99013504	4.709765363	RefSeq_peptide:NP_001105269; phosphate transporter protein1 | UniGene:Zm.66387; Phosphate transporter protein1 | Uniprot/SPTREMBL:B4FQF4; Putative uncharacterized protein | Uniprot/SPTREMBL:B4FSY5; Putative uncharacterized protein | Uniprot/SPTREMBL:B6TND9; Inorganic phosphate transporter 1-4 | Uniprot/SPTREMBL:Q49B43; Inorganic phosphate transporter 4 | Uniprot/SPTREMBL:Q49B45; Inorganic phospha…
GRMZM2G009715_T01	transport.potassium	glutathione-regulated potassium-efflux system protein kefB, putative, expressed	AT4G04850.1	KEA3; potassium ion transmembrane transporter/ potassium:hydrogen antiporter	9.086758412	55.21845599	97.00552462	73.75609989	UniGene:Zm.127141; Hypothetical protein LOC100382049 | RefSeq_peptide:NP_001168285; hypothetical protein LOC100382049 | RefSeq_dna:NM_001174814; hypothetical protein LOC100382049 (LOC100382049) mRNA | GO:0055085; transmembrane transport | GO:0016021; integral to membrane | GO:0015299; solute:hydrogen antiporter activity | GO:0008324; cation transmembrane transporter activity | GO:0006813; potassi…
GRMZM2G009715_T02	transport.potassium	glutathione-regulated potassium-efflux system protein kefB, putative, expressed	AT4G04850.1	KEA3; potassium ion transmembrane transporter/ potassium:hydrogen antiporter	9.086758412	55.21845599	97.00552462	73.75609989	GO:0055085; transmembrane transport | GO:0050826; response to freezing | GO:0050825; ice binding | GO:0042309; homoiothermy | GO:0016021; integral to membrane | GO:0015299; solute:hydrogen antiporter activity | GO:0008324; cation transmembrane transporter activity | GO:0006813; potassium ion transport | GO:0006812; cation transport
GRMZM2G022915_T01	transport.potassium	potassium channel AKT1, putative, expressed	AT2G26650.1	AKT1 (ARABIDOPSIS K TRANSPORTER 1); cyclic nucleotide binding / inward rectifier potassium channel	0.730376185	1.906278578	12.78503247	10.73439229	GO:0055085; transmembrane transport | GO:0016020; membrane | GO:0006811; ion transport | GO:0006418; tRNA aminoacylation for protein translation | GO:0006412; translation | GO:0005737; cytoplasm | GO:0005524; ATP binding | GO:0005216; ion channel activity | GO:0004812; aminoacyl-tRNA ligase activity | GO:0000166; nucleotide binding
GRMZM2G058948_T01	transport.potassium	KEA1, putative, expressed	AT1G01790.1	KEA1 (K EFFLUX ANTIPORTER 1); potassium ion transmembrane transporter/ potassium:hydrogen antiporter	19.31854068	27.80876365	36.4967264	28.14198677	GO:0055085; transmembrane transport | GO:0016021; integral to membrane | GO:0015299; solute:hydrogen antiporter activity | GO:0008324; cation transmembrane transporter activity | GO:0006812; cation transport
GRMZM2G081666_T01	transport.potassium	potassium channel KAT1, putative, expressed	AT4G18290.1	KAT2 (POTASSIUM CHANNEL IN ARABIDOPSIS THALIANA 2); cyclic nucleotide binding / inward rectifier potassium channel	0.550084606	6.085610722	9.271936262	8.339948179	RefSeq_dna:NM_001111770; potassium channel3 (kch3) mRNA | RefSeq_peptide:NP_001105240; potassium channel3 | UniGene:Zm.61601; Transcribed locus | UniGene:Zm.9559; Potassium channel3 | Uniprot/SPTREMBL:C0PJH8; Putative uncharacterized protein | Uniprot/SPTREMBL:Q6SA20; Inward rectifying shaker K+ channel | Uniprot/SPTREMBL:Q8VX27; Inwardly rectifying potassium channel | MaizeGDB_GenBank:AJ421640; …
GRMZM2G081666_T02	transport.potassium	potassium channel KAT1, putative, expressed	AT4G18290.1	KAT2 (POTASSIUM CHANNEL IN ARABIDOPSIS THALIANA 2); cyclic nucleotide binding / inward rectifier potassium channel	0.550084606	6.085610722	9.271936262	8.339948179	GO:0055085; transmembrane transport | GO:0016020; membrane | GO:0006813; potassium ion transport | GO:0006811; ion transport | GO:0005249; voltage-gated potassium channel activity | GO:0005216; ion channel activity
GRMZM2G093313_T01	transport.potassium	potassium channel KAT1, putative, expressed	AT5G46240.1	KAT1 (POTASSIUM CHANNEL IN ARABIDOPSIS THALIANA 1); cyclic nucleotide binding / inward rectifier potassium channel	0.181125419	0.64512542	2.799444551	2.278438108	GO:0055085; transmembrane transport | GO:0016020; membrane | GO:0008076; voltage-gated potassium channel complex | GO:0006813; potassium ion transport | GO:0006811; ion transport | GO:0005249; voltage-gated potassium channel activity | GO:0005216; ion channel activity
GRMZM2G093313_T02	transport.potassium	potassium channel KAT1, putative, expressed	AT5G46240.1	KAT1 (POTASSIUM CHANNEL IN ARABIDOPSIS THALIANA 1); cyclic nucleotide binding / inward rectifier potassium channel	0.181125419	0.64512542	2.799444551	2.278438108	GO:0055085; transmembrane transport | GO:0016020; membrane | GO:0008076; voltage-gated potassium channel complex | GO:0006813; potassium ion transport | GO:0006811; ion transport | GO:0005249; voltage-gated potassium channel activity | GO:0005216; ion channel activity
GRMZM2G093643_T01	transport.potassium	KEA1, putative, expressed	AT1G01790.1	KEA1 (K EFFLUX ANTIPORTER 1); potassium ion transmembrane transporter/ potassium:hydrogen antiporter	10.57070999	29.14047009	45.46050688	39.09686678	UniGene:Zm.131423; Transcribed locus moderately similar to XP_002448794.1 hypothetical protein SORBIDRAFT_06g033310 [Sorghum bicolor] | GO:0055085; transmembrane transport | GO:0016021; integral to membrane | GO:0015299; solute:hydrogen antiporter activity | GO:0008324; cation transmembrane transporter activity | GO:0006812; cation transport
GRMZM2G310569_T01	transport.potassium	potassium channel SKOR, putative, expressed	AT3G02850.1	SKOR; cyclic nucleotide binding / inward rectifier potassium channel/ outward rectifier potassium channel	0.344302955	0.495484758	10.48234599	10.02570304	Uniprot/SPTREMBL:Q5EEQ2; Potassium outward rectifying channel Fragment | UniGene:Zm.149456; TSA: Zea mays contig17010 mRNA sequence | GO:0055085; transmembrane transport | GO:0016020; membrane | GO:0006813; potassium ion transport | GO:0006811; ion transport | GO:0005249; voltage-gated potassium channel activity | GO:0005216; ion channel activity
GRMZM2G115658_T01	transport.sugars	carbohydrate transporter/ sugar porter/ transporter, putative, expressed	AT5G13750.1	ZIFL1 (ZINC INDUCED FACILITATOR-like 1); tetracycline:hydrogen antiporter	0.49109602	0.699666625	4.596478254	3.721851585	Uniprot/SPTREMBL:B6SKE4; Carbohydrate transporter/ sugar porter/ transporter | Uniprot/SPTREMBL:B4FAZ2; Putative uncharacterized protein | UniGene:Zm.24820; Hypothetical protein LOC100192005 | RefSeq_peptide:NP_001130901; hypothetical protein LOC100192005 | RefSeq_dna:NM_001137429; hypothetical protein LOC100192005 (LOC100192005) mRNA | GO:0055085; transmembrane transport | EntrezGene:100192005; …
GRMZM2G115658_T02	transport.sugars	carbohydrate transporter/ sugar porter/ transporter, putative, expressed	AT5G13750.1	ZIFL1 (ZINC INDUCED FACILITATOR-like 1); tetracycline:hydrogen antiporter	0.49109602	0.699666625	4.596478254	3.721851585	GO:0055085; transmembrane transport | GO:0046677; response to antibiotic | GO:0016021; integral to membrane | GO:0015904; tetracycline transport | GO:0015520; tetracycline:hydrogen antiporter activity
GRMZM2G161310_T01	transport.sugars	carbohydrate transporter/ sugar porter/ transporter, putative, expressed	AT3G43790.3	ZIFL2 (ZINC INDUCED FACILITATOR-like 2); carbohydrate transmembrane transporter/ sugar:hydrogen symporter	0.31668091	0.536719167	7.135232264	4.248149044	Uniprot/SPTREMBL:B4FYC3; Putative uncharacterized protein | UniGene:Zm.78921; Hypothetical protein LOC100273965 | RefSeq_peptide:NP_001141824; hypothetical protein LOC100273965 | RefSeq_dna:NM_001148352; hypothetical protein LOC100273965 (LOC100273965) mRNA | GO:0055085; transmembrane transport | GO:0046677; response to antibiotic | GO:0016021; integral to membrane | GO:0015904; tetracycline tran…
GRMZM2G068212_T01	transport.sulphate	sulfate transporter 4.1, chloroplast precursor, putative, expressed	AT5G13550.1	SULTR4;1; sulfate transmembrane transporter	7.150388836	17.83686904	22.23280807	20.64255473	Uniprot/SPTREMBL:C0HHW0; Putative uncharacterized protein | Uniprot/SPTREMBL:B6SXI4; Sulfate transporter 4.1 | Uniprot/SPTREMBL:A5CVC7; Sulfate transporter Fragment | UniGene:Zm.31528; Sulfate transporter | UniGene:Zm.155114; TSA: Zea mays contig30767 mRNA sequence | GO:0055085; transmembrane transport | GO:0016021; integral to membrane | GO:0016020; membrane | GO:0008272; sulfate transport | GO:…
GRMZM2G108477_T01	transport.unspecified cations	MRS2-10, putative, expressed	AT1G16010.2	magnesium transporter CorA-like family protein (MRS2-1)	3.760150698	13.66657794	27.54176525	20.33282932	Uniprot/SPTREMBL:B6TGF7; MRS2-10 | UniGene:Zm.119204; MRS2-10 | RefSeq_peptide:NP_001149635; MRS2-10 | RefSeq_dna:NM_001156163; MRS2-10 (LOC100283261) mRNA | GO:0055085; transmembrane transport | GO:0046873; metal ion transmembrane transporter activity | GO:0030001; metal ion transport | GO:0016020; membrane | EntrezGene:100283261; MRS2-10
GRMZM2G145794_T01	transport.unspecified cations	metal ion transporter, putative, expressed	AT3G58970.1	magnesium transporter CorA-like family protein	4.172958594	8.062899408	10.37621548	9.123022644	RefSeq_peptide:NP_001140675; hypothetical protein LOC100272750 | UniGene:Zm.119168; Hypothetical protein LOC100272750 | Uniprot/SPTREMBL:B4FB43; Putative uncharacterized protein | Uniprot/SPTREMBL:B4FQF3; Putative uncharacterized protein | RefSeq_dna:NM_001147203; hypothetical protein LOC100272750 (LOC100272750) mRNA | GO:0055085; transmembrane transport | GO:0046873; metal ion transmembrane tran…
GRMZM2G145794_T02	transport.unspecified cations	metal ion transporter, putative, expressed	AT3G58970.1	magnesium transporter CorA-like family protein	4.172958594	8.062899408	10.37621548	9.123022644	Uniprot/SPTREMBL:B4FB43; Putative uncharacterized protein | GO:0055085; transmembrane transport | GO:0046873; metal ion transmembrane transporter activity | GO:0030001; metal ion transport | GO:0016020; membrane
GRMZM2G043075_T05	development.unspecified	transparent testa 12 protein, putative, expressed	AT5G65380.1	ripening-responsive protein, putative	1.025803732	3.321515943	32.04849021	52.26813644	GO:0055085; transmembrane transport | GO:0016020; membrane | GO:0015297; antiporter activity | GO:0015238; drug transmembrane transporter activity | GO:0006855; drug transmembrane transport
GRMZM2G043075_T02	development.unspecified	transparent testa 12 protein, putative, expressed	AT5G65380.1	ripening-responsive protein, putative	1.025803732	3.321515943	32.04849021	52.26813644	GO:0055085; transmembrane transport | GO:0016020; membrane | GO:0015297; antiporter activity | GO:0015238; drug transmembrane transporter activity | GO:0006855; drug transmembrane transport
GRMZM2G043075_T01	development.unspecified	transparent testa 12 protein, putative, expressed	AT5G65380.1	ripening-responsive protein, putative	1.025803732	3.321515943	32.04849021	52.26813644	Uniprot/SPTREMBL:B4G1J4; Putative uncharacterized protein | GO:0055085; transmembrane transport | GO:0016020; membrane | GO:0015297; antiporter activity | GO:0015238; drug transmembrane transporter activity | GO:0006855; drug transmembrane transport
GRMZM2G043075_T03	development.unspecified	transparent testa 12 protein, putative, expressed	AT5G65380.1	ripening-responsive protein, putative	1.025803732	3.321515943	32.04849021	52.26813644	GO:0055085; transmembrane transport | GO:0016020; membrane | GO:0015297; antiporter activity | GO:0015238; drug transmembrane transporter activity | GO:0006855; drug transmembrane transport
GRMZM2G043075_T04	development.unspecified	transparent testa 12 protein, putative, expressed	AT5G65380.1	ripening-responsive protein, putative	1.025803732	3.321515943	32.04849021	52.26813644	Uniprot/SPTREMBL:B6SVP1; Transparent testa 12 protein | Uniprot/SPTREMBL:B4G1J4; Putative uncharacterized protein | RefSeq_peptide:NP_001147862; LOC100281472 | RefSeq_dna:NM_001154390; LOC100281472 (CL65845_1) mRNA | GO:0055085; transmembrane transport | GO:0016020; membrane | GO:0015297; antiporter activity | GO:0015238; drug transmembrane transporter activity | GO:0006855; drug transmembrane tr…
GRMZM2G025742_T01	hormone metabolism.auxin.signal transduction	auxin efflux carrier component 6, putative, expressed	AT5G16530.1	PIN5 (PIN-FORMED 5); auxin:hydrogen symporter/ transporter	0.100489365	0.723068853	9.403298108	21.01036352	Uniprot/SPTREMBL:B6SYL2; Auxin efflux carrier component 6 | RefSeq_peptide:NP_001148155; auxin efflux carrier component 6 | RefSeq_dna:NM_001154683; auxin efflux carrier component 6 (LOC100281763) mRNA | GO:0055085; transmembrane transport | GO:0016021; integral to membrane | EntrezGene:100281763; auxin efflux carrier component 6
GRMZM2G175983_T01	hormone metabolism.auxin.signal transduction	auxin efflux carrier component 6, putative, expressed	AT5G16530.1	PIN5 (PIN-FORMED 5); auxin:hydrogen symporter/ transporter	0.022410252	0.193502923	5.125834411	15.85867157	GO:0055085; transmembrane transport | GO:0016021; integral to membrane
GRMZM2G175983_T02	hormone metabolism.auxin.signal transduction	auxin efflux carrier component 6, putative, expressed	AT5G16530.1	PIN5 (PIN-FORMED 5); auxin:hydrogen symporter/ transporter	0.022410252	0.193502923	5.125834411	15.85867157	GO:0016021; integral to membrane | GO:0055085; transmembrane transport
GRMZM2G032896_T01	hormone metabolism.brassinosteroid.synthesis-degradation.BRs.other	cytochrome P450 90D2, putative, expressed	AT3G13730.1	CYP90D1; oxidoreductase, acting on paired donors, with incorporation or reduction of molecular oxygen, NADH or NADPH as one donor, and incorporation of one atom of oxygen / oxygen binding	0.038469604	7.889003125	11.92841295	12.03831158	GO:0055085; transmembrane transport | GO:0055114; oxidation reduction | UniGene:Zm.85623; Clone 1681349 mRNA sequence | Uniprot/SPTREMBL:B6T0I8; Cytochrome P450 CYP90D10.b | GO:0020037; heme binding | GO:0016020; membrane | GO:0009055; electron carrier activity | GO:0006810; transport | GO:0005506; iron ion binding | GO:0005215; transporter activity | GO:0004497; monooxygenase activity
GRMZM2G058227_T01	lipid metabolism.lipid degradation.lysophospholipases.glycerophosphodiester phosphodiesterase	glycerophosphoryl diester phosphodiesterase precursor, putative, expressed	AT5G08030.1	glycerophosphoryl diester phosphodiesterase family protein	0.705714132	9.377279857	10.27329344	32.13649508	GO:0055085; transmembrane transport | RefSeq_dna:NM_001156704; LOC100283806 (si605064b07) mRNA | RefSeq_peptide:NP_001150176; LOC100283806 | UniGene:Zm.16293; LOC100283806 | Uniprot/SPTREMBL:B6TLZ9; Glycerophosphoryl diester phosphodiesterase | GO:0016020; membrane | GO:0008889; glycerophosphodiester phosphodiesterase activity | GO:0008081; phosphoric diester hydrolase activity | EntrezGene:10028…
GRMZM2G089121_T01	misc.oxidases - copper, flavone etc.	disulfide oxidoreductase/ monooxygenase, putative, expressed	AT1G12200.1	flavin-containing monooxygenase family protein / FMO family protein	7.164586702	13.17644127	41.47813573	42.84121618	GO:0055114; oxidation reduction | GO:0050661; NADP or NADPH binding | GO:0050660; FAD binding | GO:0008324; cation transmembrane transporter activity | GO:0006813; potassium ion transport | GO:0006355; regulation of transcription DNA-dependent | GO:0005634; nucleus | GO:0004879; ligand-dependent nuclear receptor activity | GO:0004499; flavin-containing monooxygenase activity | GO:0003677; DNA bin…
GRMZM2G089121_T03	misc.oxidases - copper, flavone etc.	disulfide oxidoreductase/ monooxygenase, putative, expressed	AT1G12200.1	flavin-containing monooxygenase family protein / FMO family protein	7.164586702	13.17644127	41.47813573	42.84121618	GO:0055114; oxidation reduction | GO:0050661; NADP or NADPH binding | GO:0050660; FAD binding | GO:0016491; oxidoreductase activity | GO:0008324; cation transmembrane transporter activity | GO:0006813; potassium ion transport | GO:0004499; flavin-containing monooxygenase activity
GRMZM2G126496_T02	misc.short chain dehydrogenase/reductase (SDR)	retinol dehydrogenase 11, putative, expressed	AT4G23420.2	short-chain dehydrogenase/reductase (SDR) family protein	0	5.569358497	11.81402868	22.16198868	UniGene:Zm.7597; Transcribed locus weakly similar to NP_001173846.1 Os04g0291000 [Oryza sativa Japonica Group] | UniGene:Zm.156023; TSA: Zea mays contig39530 mRNA sequence | GO:0055114; oxidation reduction | GO:0055085; transmembrane transport | GO:0030288; outer membrane-bounded periplasmic space | GO:0016491; oxidoreductase activity | GO:0016020; membrane | GO:0009428; bacterial-type flagellum …
GRMZM2G050329_T01	not assigned	SPX domain-like protein, putative, expressed	AT4G22990.1	SPX (SYG1/Pho81/XPR1) domain-containing protein	5.574881714	33.42469001	60.77142568	63.32045185	GO:0055085; transmembrane transport | UniGene:Zm.17984; TSA: Zea mays contig21071 mRNA sequence
GRMZM2G096008_T01	not assigned	metal ion binding protein, putative, expressed	AT5G02600.2	heavy-metal-associated domain-containing protein	0.522390691	2.029778938	3.24959117	7.463732581	UniGene:Zm.126292; TSA: Zea mays contig33722 mRNA sequence | GO:0046872; metal ion binding | GO:0030001; metal ion transport | GO:0015694; mercury ion transport | GO:0015097; mercury ion transmembrane transporter activity
GRMZM2G128078_T01	not assigned	gtk16 protein, putative, expressed	AT4G17790.1	0	14.34290183	15.69820055	26.73618006	36.96777863	Uniprot/SPTREMBL:B4FUK0; Putative uncharacterized protein | UniGene:Zm.94319; Hypothetical protein LOC100273321 | RefSeq_peptide:NP_001141234; hypothetical protein LOC100273321 | RefSeq_dna:NM_001147762; hypothetical protein LOC100273321 (LOC100273321) mRNA | GO:0055085; transmembrane transport | GO:0016020; membrane | GO:0006821; chloride transport | GO:0005247; voltage-gated chloride channel ac…
GRMZM2G166976_T01	not assigned	beta-lactamase, class A, putative, expressed	AT1G63010.2	SPX (SYG1/Pho81/XPR1) domain-containing protein	0.770958272	3.900524094	15.02733175	19.01652223	Uniprot/SPTREMBL:C4J6T4; Putative uncharacterized protein | Uniprot/SPTREMBL:C0P927; Putative uncharacterized protein | UniGene:Zm.32087; Full-length cDNA clone ZM_BFc0178H02 | GO:0055085; transmembrane transport
GRMZM2G173684_T01	protein.targeting.unknown	solute carrier family 35, member F1, putative, expressed	AT3G59310.1	unknown protein	5.678863854	8.018809128	10.84911422	19.19690422	Uniprot/SPTREMBL:B4FG06; Putative uncharacterized protein | UniGene:Zm.149151; TSA: Zea mays contig18267 mRNA sequence | UniGene:Zm.11705; Hypothetical protein LOC100193708 | RefSeq_peptide:NP_001132272; hypothetical protein LOC100193708 | RefSeq_dna:NM_001138800; hypothetical protein LOC100193708 (LOC100193708) mRNA | GO:0055085; transmembrane transport | EntrezGene:100193708; hypothetical prote…
GRMZM2G084881_T01	redox.ascorbate and glutathione	monodehydroascorbate reductase, putative, expressed	AT3G52880.1	monodehydroascorbate reductase, putative	124.8016237	183.0574025	283.9680335	298.0379355	Uniprot/SPTREMBL:C4J4E4; Putative uncharacterized protein | UniGene:Zm.40076; Full-length cDNA clone ZM_BFc0047P07 | GO:0055114; oxidation reduction | GO:0050660; FAD binding | GO:0016491; oxidoreductase activity | GO:0008324; cation transmembrane transporter activity | GO:0006813; potassium ion transport
GRMZM2G134708_T01	redox.ascorbate and glutathione	monodehydroascorbate reductase, putative, expressed	AT3G52880.1	monodehydroascorbate reductase, putative	0.265644565	3.112915261	12.23919166	17.91633986	RefSeq_dna:NM_001174881; hypothetical protein LOC100382120 (LOC100382120) mRNA | RefSeq_peptide:NP_001168352; hypothetical protein LOC100382120 | UniGene:Zm.1708; Hypothetical protein LOC100382120 | Uniprot/SPTREMBL:C0P4M0; Putative uncharacterized protein | GO:0055114; oxidation reduction | GO:0050660; FAD binding | GO:0016491; oxidoreductase activity | GO:0008324; cation transmembrane transport…
GRMZM2G120563_T08	RNA.regulation of transcription.C2H2 zinc finger family	GTPase activating protein, putative, expressed	AT1G70790.2	C2 domain-containing protein	16.13442995	40.3829023	83.17152895	94.98780982	GO:0055085; transmembrane transport | GO:0016020; membrane | GO:0015297; antiporter activity | GO:0015238; drug transmembrane transporter activity | GO:0006855; drug transmembrane transport
GRMZM2G120563_T09	RNA.regulation of transcription.C2H2 zinc finger family	GTPase activating protein, putative, expressed	AT1G70790.2	C2 domain-containing protein	16.13442995	40.3829023	83.17152895	94.98780982	Uniprot/SPTREMBL:B8A345; Putative uncharacterized protein | UniGene:Zm.98771; Hypothetical protein LOC100280310 | UniGene:Zm.118946; Clone 489830 mRNA sequence | RefSeq_peptide:NP_001146708; hypothetical protein LOC100280310 | RefSeq_dna:NM_001153236; hypothetical protein LOC100280310 (LOC100280310) mRNA | GO:0055085; transmembrane transport | GO:0016020; membrane | GO:0015297; antiporter activit…
GRMZM2G088601_T01	secondary metabolism.isoprenoids.carotenoids.phytoene dehydrogenase	expressed protein	AT4G14210.2	PDS3 (PHYTOENE DESATURASE 3); phytoene dehydrogenase	0.378943775	4.862581099	44.10298394	56.43075721	GO:0006813; potassium ion transport | GO:0008152; metabolic process | GO:0008324; cation transmembrane transporter activity | GO:0016491; oxidoreductase activity | GO:0055114; oxidation reduction | Uniprot/SPTREMBL:B4G090; Putative uncharacterized protein
GRMZM2G088601_T03	secondary metabolism.isoprenoids.carotenoids.phytoene dehydrogenase	expressed protein	AT4G14210.2	PDS3 (PHYTOENE DESATURASE 3); phytoene dehydrogenase	0.378943775	4.862581099	44.10298394	56.43075721	GO:0055114; oxidation reduction | GO:0016491; oxidoreductase activity | GO:0008324; cation transmembrane transporter activity | GO:0008152; metabolic process | GO:0006813; potassium ion transport
GRMZM2G104730_T01	signalling.calcium	calcium-transporting ATPase 4, plasma membrane-type, putative, expressed	AT2G41560.1	ACA4 (AUTO-INHIBITED CA(2+)-ATPASE, ISOFORM 4); calcium-transporting ATPase/ calmodulin binding	2.346067555	13.01341078	22.14145874	33.20053234	UniGene:Zm.82621; TSA: Zea mays contig46341 mRNA sequence | UniGene:Zm.25919; Transcribed locus strongly similar to NP_001065710.2 Os11g0140400 [Oryza sativa Japonica Group] | UniGene:Zm.145477; TSA: Zea mays contig46998 mRNA sequence | GO:0046983; protein dimerization activity | GO:0016820; hydrolase activity acting on acid anhydrides catalyzing transmembrane movement of substances | GO:0016020;…
GRMZM2G104730_T02	signalling.calcium	calcium-transporting ATPase 4, plasma membrane-type, putative, expressed	AT2G41560.1	ACA4 (AUTO-INHIBITED CA(2+)-ATPASE, ISOFORM 4); calcium-transporting ATPase/ calmodulin binding	2.346067555	13.01341078	22.14145874	33.20053234	GO:0015662; ATPase activity coupled to transmembrane movement of ions phosphorylative mechanism | GO:0016020; membrane | GO:0016820; hydrolase activity acting on acid anhydrides catalyzing transmembrane movement of substances | GO:0046983; protein dimerization activity | UniGene:Zm.145477; TSA: Zea mays contig46998 mRNA sequence | UniGene:Zm.25919; Transcribed locus strongly similar to NP_0010657…
GRMZM2G352695_T01	signalling.calcium	calcium-transporting ATPase 2, plasma membrane-type, putative, expressed	AT4G37640.1	ACA2 (CALCIUM ATPASE 2); calcium ion transmembrane transporter/ calcium-transporting ATPase/ calmodulin binding	0.638223001	2.590208234	4.945312036	7.805411931	GO:0015662; ATPase activity coupled to transmembrane movement of ions phosphorylative mechanism | GO:0016020; membrane | GO:0016820; hydrolase activity acting on acid anhydrides catalyzing transmembrane movement of substances | GO:0031177; phosphopantetheine binding | RefSeq_dna:NM_001174261; hypothetical protein LOC100381420 (LOC100381420) mRNA | RefSeq_peptide:NP_001167732; hypothetical protein…
GRMZM2G014089_T02	transport.ABC transporters and multidrug resistance systems	multidrug resistance protein 8, putative, expressed	AT1G02520.1	PGP11 (P-GLYCOPROTEIN 11); ATPase, coupled to transmembrane movement of substances	0	2.436084178	2.71624796	2.953141134	GO:0055085; transmembrane transport | GO:0042626; ATPase activity coupled to transmembrane movement of substances | GO:0017111; nucleoside-triphosphatase activity | GO:0016021; integral to membrane | GO:0006810; transport | GO:0005524; ATP binding | GO:0000166; nucleotide binding
GRMZM2G014089_T01	transport.ABC transporters and multidrug resistance systems	multidrug resistance protein 8, putative, expressed	AT1G02520.1	PGP11 (P-GLYCOPROTEIN 11); ATPase, coupled to transmembrane movement of substances	0	2.436084178	2.71624796	2.953141134	GO:0055085; transmembrane transport | GO:0042626; ATPase activity coupled to transmembrane movement of substances | GO:0017111; nucleoside-triphosphatase activity | GO:0016887; ATPase activity | GO:0016021; integral to membrane | GO:0006810; transport | GO:0005524; ATP binding | GO:0000166; nucleotide binding
GRMZM2G032218_T01	transport.ABC transporters and multidrug resistance systems	multidrug resistance-associated protein 3, putative, expressed	AT3G60160.1	ATMRP9; ATPase, coupled to transmembrane movement of substances	1.125168687	8.524743098	34.69357211	65.9497884	UniGene:Zm.153381; TSA: Zea mays contig38664 mRNA sequence | GO:0055085; transmembrane transport | GO:0042626; ATPase activity coupled to transmembrane movement of substances | GO:0017111; nucleoside-triphosphatase activity | GO:0016887; ATPase activity | GO:0016021; integral to membrane | GO:0006810; transport | GO:0005524; ATP binding | GO:0000166; nucleotide binding
GRMZM2G032218_T02	transport.ABC transporters and multidrug resistance systems	multidrug resistance-associated protein 3, putative, expressed	AT3G60160.1	ATMRP9; ATPase, coupled to transmembrane movement of substances	1.125168687	8.524743098	34.69357211	65.9497884	UniGene:Zm.153381; TSA: Zea mays contig38664 mRNA sequence | GO:0055085; transmembrane transport | GO:0042626; ATPase activity coupled to transmembrane movement of substances | GO:0017111; nucleoside-triphosphatase activity | GO:0016887; ATPase activity | GO:0016021; integral to membrane | GO:0006810; transport | GO:0005524; ATP binding | GO:0000166; nucleotide binding
GRMZM2G084181_T01	transport.ABC transporters and multidrug resistance systems	multidrug resistance-associated protein 2, putative, expressed	AT2G34660.1	ATMRP2 (ARABIDOPSIS THALIANA MULTIDRUG RESISTANCE-ASSOCIATED PROTEIN 2); ATPase, coupled to transmembrane movement of substances	15.38144739	22.31375149	46.00977592	63.37842822	UniGene:Zm.98006; TSA: Zea mays contig41125 mRNA sequence | UniGene:Zm.139185; TSA: Zea mays contig37990 mRNA sequence | UniGene:Zm.115085; Transcribed locus | UniGene:Zm.113959; Transcribed locus | UniGene:Zm.103199; Transcribed locus strongly similar to NP_001053904.1 Os04g0620000 [Oryza sativa (japonica cultivar-group)] | GO:0055085; transmembrane transport | GO:0042626; ATPase activity couple…
GRMZM2G413774_T01	transport.ABC transporters and multidrug resistance systems	multidrug resistance-associated protein 3, putative, expressed	AT3G60160.1	ATMRP9; ATPase, coupled to transmembrane movement of substances	0.142601667	1.140767233	4.282822199	7.757651416	GO:0055085; transmembrane transport | GO:0042626; ATPase activity coupled to transmembrane movement of substances | GO:0017111; nucleoside-triphosphatase activity | GO:0016887; ATPase activity | GO:0016021; integral to membrane | GO:0006810; transport | GO:0005524; ATP binding | GO:0000166; nucleotide binding | UniGene:Zm.153381; TSA: Zea mays contig38664 mRNA sequence
GRMZM2G127150_T01	transport.amino acids	cationic amino acid transporter, putative	AT3G13620.1	amino acid permease family protein	0.369295694	0.664314613	1.276247887	3.122486927	Uniprot/SPTREMBL:B6UB79; Cationic amino acid transporter | UniGene:Zm.28468; Cationic amino acid transporter | RefSeq_peptide:NP_001152250; cationic amino acid transporter | RefSeq_dna:NM_001158778; cationic amino acid transporter (LOC100285888) mRNA | GO:0055085; transmembrane transport | GO:0016020; membrane | GO:0015171; amino acid transmembrane transporter activity | GO:0006865; amino acid tr…
GRMZM2G068904_T01	transport.cyclic nucleotide or calcium regulated channels	cyclic nucleotide-gated ion channel 15, putative, expressed	AT2G28260.1	ATCNGC15; calmodulin binding / cation channel/ cyclic nucleotide binding	0.24367029	1.014423068	2.331967646	4.203177708	UniGene:Zm.37702; Transcribed locus strongly similar to XP_002452480.1 hypothetical protein SORBIDRAFT_04g026580 [Sorghum bicolor] | GO:0055085; transmembrane transport | GO:0016021; integral to membrane | GO:0016020; membrane | GO:0007186; G-protein coupled receptor protein signaling pathway | GO:0006813; potassium ion transport | GO:0006811; ion transport | GO:0005249; voltage-gated potassium c…
GRMZM2G028325_T01	transport.Major Intrinsic Proteins.NIP	aquaporin NIP4.2, putative, expressed	AT4G10380.1	NIP5;1; arsenite transmembrane transporter/ boron transporter/ water channel	0.738541379	3.736516683	108.71865	151.1207231	GO:0055085; transmembrane transport | RefSeq_dna:NM_001112167; NOD26-like membrane integral protein ZmNIP2-1 (NIP2-1) mRNA | RefSeq_peptide:NP_001105637; aquaporin NIP2-1 | UniGene:Zm.84816; NOD26-like membrane integral protein ZmNIP2-1 | Uniprot/SWISSPROT:Q19KC1; Aquaporin NIP2-1 (NOD26-like intrinsic protein 2-1)(ZmNIP2-1)(ZmNIP2;1) | GO:0016021; integral to membrane | GO:0016020; membrane | GO…
GRMZM2G082184_T01	transport.Major Intrinsic Proteins.NIP	aquaporin NIP4.2, putative, expressed	AT4G10380.1	NIP5;1; arsenite transmembrane transporter/ boron transporter/ water channel	0.244951854	1.843893526	13.40480194	24.48045022	Uniprot/SPTREMBL:B4FC34; Putative uncharacterized protein | UniGene:Zm.99759; Hypothetical protein LOC100192638 | RefSeq_peptide:NP_001131324; hypothetical protein LOC100192638 | RefSeq_dna:NM_001137852; hypothetical protein LOC100192638 (LOC100192638) mRNA | GO:0055085; transmembrane transport | GO:0016021; integral to membrane | GO:0016020; membrane | GO:0006810; transport | GO:0005215; transpo…
GRMZM2G137108_T01	transport.Major Intrinsic Proteins.NIP	aquaporin NIP4.1, putative, expressed	AT5G37810.1	NIP4;1 (NOD26-LIKE INTRINSIC PROTEIN 4;1); water channel	12.83963105	65.19495538	110.8307297	191.0704055	RefSeq_peptide:NP_001105020; aquaporin NIP2-2 | UniGene:Zm.23582; NOD26-like membrane intrinsic protein2 | Uniprot/SPTREMBL:B6STJ2; Aquaporin NIP4.1 | Uniprot/SPTREMBL:B6SU72; Aquaporin NIP4.1Putative uncharacterized protein ; | Uniprot/SWISSPROT:Q9ATN2; Aquaporin NIP2-2 (NOD26-like intrinsic protein 2-2)(ZmNIP2-2)(ZmNIP2;2) | RefSeq_dna:NM_001111550; NOD26-like membrane intrinsic protein2 (nip2b…
GRMZM2G027098_T01	transport.Major Intrinsic Proteins.TIP	aquaporin TIP2.1, putative, expressed	AT5G47450.1	AtTIP2;3; ammonia transporter/ methylammonium transmembrane transporter/ water channel	84.54833615	136.8424243	174.5520687	380.7838247	RefSeq_dna:NM_001111560; tonoplast intrinsic protein2 (tip2a) mRNA | RefSeq_peptide:NP_001105030; aquaporin TIP2-1 | UniGene:Zm.100858; Transcribed locus strongly similar to NP_001105030.1 aquaporin TIP2-1 [Zea mays] | UniGene:Zm.613; Tonoplast intrinsic protein2 | UniGene:Zm.95867; Transcribed locus strongly similar to NP_001105030.1 aquaporin TIP2-1 [Zea mays] | Uniprot/SPTREMBL:B6TNY0; Aquapor…
GRMZM2G056908_T01	transport.Major Intrinsic Proteins.TIP	aquaporin TIP2.1, putative, expressed	AT5G47450.1	AtTIP2;3; ammonia transporter/ methylammonium transmembrane transporter/ water channel	4.553361878	5.919930171	7.847641627	21.60773336	Uniprot/SWISSPROT:Q9ATL8; Aquaporin TIP2-2 (Tonoplast intrinsic protein 2-2)(ZmTIP2-2)(ZmTIP2;2) | UniGene:Zm.614; Tonoplast intrinsic protein2 | RefSeq_peptide:NP_001105031; aquaporin TIP2-2 | RefSeq_dna:NM_001111561; tonoplast intrinsic protein2 (tip2b) mRNA | GO:0055085; transmembrane transport | GO:0016021; integral to membrane | GO:0016020; membrane | GO:0006810; transport | GO:0005215; tran…
GRMZM2G009223_T01	transport.metabolite transporters at the envelope membrane	glucose-6-phosphate/phosphate translocator 2, chloroplast precursor, putative, expressed	AT1G61800.1	GPT2; antiporter/ glucose-6-phosphate transmembrane transporter	141.8912849	169.8586536	238.677001	567.4675114	Uniprot/SPTREMBL:B6SRN7; Glucose-6-phosphate/phosphate translocator 2 | UniGene:Zm.15311; Glucose-6-phosphate/phosphate translocator 2 | RefSeq_peptide:NP_001147439; glucose-6-phosphate/phosphate translocator 2 | RefSeq_dna:NM_001153967; glucose-6-phosphate/phosphate translocator 2 (LOC100281048) mRNA | GO:0055085; transmembrane transport | GO:0016021; integral to membrane | GO:0016020; membrane …
GRMZM2G137849_T01	transport.metabolite transporters at the envelope membrane	protein brittle-1, chloroplast precursor, putative, expressed	AT4G32400.1	SHS1 (SODIUM HYPERSENSITIVE 1); binding / nucleotide transmembrane transporter/ transporter	6.151567381	14.90581402	19.13745813	22.23686398	GO:0016765; transferase activity transferring alkyl or aryl (other than methyl) groups | GO:0055085; transmembrane transport | RefSeq_dna:NM_001130116; LOC100170234 (pco089012) mRNA | RefSeq_peptide:NP_001123588; LOC100170234 | UniGene:Zm.67045; LOC100170234 | Uniprot/SPTREMBL:B2LWG6; Nucleotide sugar translocator BT2BProtein brittle-1Putative uncharacterized protein ;; | GO:0016020; membrane | G…
GRMZM2G106921_T01	transport.metabolite transporters at the mitochondrial membrane	inner membrane transport protein, putative, expressed	AT1G12480.1	OZS1 (OZONE-SENSITIVE 1); transporter	0.551636961	1.26521142	4.429631604	7.603167058	GO:0016021; integral to membrane | GO:0055085; transmembrane transport | UniGene:Zm.127357; Clone 1535566 mRNA sequence
GRMZM2G146378_T01	transport.metabolite transporters at the mitochondrial membrane	expressed protein	AT2G35800.1	mitochondrial substrate carrier family protein	7.951928927	14.01116025	22.96817702	23.61270848	Uniprot/SPTREMBL:B6SWZ2; Putative uncharacterized protein | UniGene:Zm.85077; Hypothetical protein LOC100275632 | RefSeq_peptide:NP_001143151; hypothetical protein LOC100275632 | RefSeq_dna:NM_001149679; hypothetical protein LOC100275632 (LOC100275632) mRNA | GO:0055085; transmembrane transport | GO:0016020; membrane | GO:0006810; transport | GO:0005743; mitochondrial inner membrane | GO:0005509;…
GRMZM2G146378_T02	transport.metabolite transporters at the mitochondrial membrane	expressed protein	AT2G35800.1	mitochondrial substrate carrier family protein	7.951928927	14.01116025	22.96817702	23.61270848	GO:0055085; transmembrane transport | GO:0016020; membrane | GO:0006810; transport | GO:0005488; binding
GRMZM2G161299_T01	transport.metabolite transporters at the mitochondrial membrane	Grave disease carrier protein, putative, expressed	AT4G26180.1	mitochondrial substrate carrier family protein	1.964334382	6.463866621	8.459561892	9.077457123	Uniprot/SPTREMBL:B4F8I5; Putative uncharacterized protein | UniGene:Zm.17502; Hypothetical protein LOC100191354 | RefSeq_peptide:NP_001130260; hypothetical protein LOC100191354 | RefSeq_dna:NM_001136788; hypothetical protein LOC100191354 (LOC100191354) mRNA | GO:0055085; transmembrane transport | GO:0016020; membrane | GO:0006810; transport | GO:0005743; mitochondrial inner membrane | GO:0005488;…
GRMZM2G161299_T02	transport.metabolite transporters at the mitochondrial membrane	Grave disease carrier protein, putative, expressed	AT4G26180.1	mitochondrial substrate carrier family protein	1.964334382	6.463866621	8.459561892	9.077457123	GO:0055085; transmembrane transport | GO:0016020; membrane | GO:0006810; transport | GO:0005743; mitochondrial inner membrane | GO:0005488; binding | GO:0005215; transporter activity
GRMZM2G161299_T03	transport.metabolite transporters at the mitochondrial membrane	Grave disease carrier protein, putative, expressed	AT4G26180.1	mitochondrial substrate carrier family protein	1.964334382	6.463866621	8.459561892	9.077457123	Uniprot/SPTREMBL:C0HHG4; Putative uncharacterized protein | GO:0055085; transmembrane transport | GO:0016020; membrane | GO:0006810; transport | GO:0005743; mitochondrial inner membrane | GO:0005488; binding | GO:0005215; transporter activity
GRMZM2G161299_T04	transport.metabolite transporters at the mitochondrial membrane	Grave disease carrier protein, putative, expressed	AT4G26180.1	mitochondrial substrate carrier family protein	1.964334382	6.463866621	8.459561892	9.077457123	Uniprot/SPTREMBL:B4FQ02; Putative uncharacterized protein | GO:0055085; transmembrane transport | GO:0016020; membrane | GO:0006810; transport | GO:0005743; mitochondrial inner membrane | GO:0005488; binding | GO:0005215; transporter activity
GRMZM2G161299_T05	transport.metabolite transporters at the mitochondrial membrane	Grave disease carrier protein, putative, expressed	AT4G26180.1	mitochondrial substrate carrier family protein	1.964334382	6.463866621	8.459561892	9.077457123	GO:0055085; transmembrane transport | GO:0016020; membrane | GO:0006810; transport | GO:0005743; mitochondrial inner membrane | GO:0005488; binding
GRMZM2G169951_T01	transport.metabolite transporters at the mitochondrial membrane	C4-dicarboxylate transporter/malic acid transport protein, expressed	AT5G24030.1	SLAH3 (SLAC1 HOMOLOGUE 3); transporter	0.019099004	0.927628423	3.692172907	4.011629436	GO:0016021; integral to membrane | GO:0055085; transmembrane transport
GRMZM2G144083_T01	transport.metal	copper-transporting ATPase 3, putative, expressed	AT1G63440.1	HMA5 (HEAVY METAL ATPASE 5); ATPase, coupled to transmembrane movement of ions, phosphorylative mechanism	1.198379839	4.287052449	6.163528052	6.306050828	GO:0016021; integral to membrane | GO:0016820; hydrolase activity acting on acid anhydrides catalyzing transmembrane movement of substances | GO:0030001; metal ion transport | GO:0046872; metal ion binding | GO:0046873; metal ion transmembrane transporter activity | RefSeq_dna:NM_001148772; hypothetical protein LOC100274413 (LOC100274413) mRNA | RefSeq_peptide:NP_001142244; hypothetical protein L…
GRMZM2G072632_T01	transport.misc	auxin Efflux Carrier family protein, expressed	AT2G17500.4	auxin efflux carrier family protein	0.178148109	2.633703687	12.36104974	32.51260976	GO:0055085; transmembrane transport | GO:0016021; integral to membrane
GRMZM2G112598_T01	transport.misc	auxin Efflux Carrier family protein, expressed	AT5G65980.1	auxin efflux carrier family protein	0.351836838	0.998906231	3.658975267	11.54924559	GO:0055085; transmembrane transport | GO:0032776; DNA methylation on cytosine | GO:0016021; integral to membrane | GO:0015667; site-specific DNA-methyltransferase (cytosine-N4-specific) activity | GO:0003677; DNA binding
GRMZM2G115105_T01	transport.misc	transparent testa 12 protein, putative, expressed	AT1G15170.1	MATE efflux family protein	0.370481615	0.90879263	8.364332303	12.18716556	Uniprot/SPTREMBL:B4FRU5; Putative uncharacterized protein | UniGene:Zm.3379; Hypothetical protein LOC100272941 | RefSeq_peptide:NP_001140865; hypothetical protein LOC100272941 | RefSeq_dna:NM_001147393; hypothetical protein LOC100272941 (LOC100272941) mRNA | GO:0055085; transmembrane transport | GO:0016020; membrane | GO:0015297; antiporter activity | GO:0015238; drug transmembrane transporter ac…
GRMZM2G115105_T02	transport.misc	transparent testa 12 protein, putative, expressed	AT1G15170.1	MATE efflux family protein	0.370481615	0.90879263	8.364332303	12.18716556	GO:0055085; transmembrane transport | GO:0016020; membrane | GO:0015297; antiporter activity | GO:0015238; drug transmembrane transporter activity | GO:0006855; drug transmembrane transport
GRMZM2G170128_T01	transport.misc	transparent testa 12 protein, putative, expressed	AT3G21690.1	MATE efflux family protein	0.435920893	1.631605898	8.068482771	25.93958811	UniGene:Zm.18431; Transparent testa 12 protein | UniGene:Zm.56780; Transcribed locus | Uniprot/SPTREMBL:B4FTI0; Putative uncharacterized protein | Uniprot/SPTREMBL:B6SXU6; Transparent testa 12 protein | Uniprot/SPTREMBL:D7F4H5; MATE transporter 2 | Uniprot/SPTREMBL:D7F4H6; MATE transporter 2 | RefSeq_peptide:NP_001148084; transparent testa 12 protein | RefSeq_dna:NM_001154612; transparent testa 1…
GRMZM2G170128_T02	transport.misc	transparent testa 12 protein, putative, expressed	AT3G21690.1	MATE efflux family protein	0.435920893	1.631605898	8.068482771	25.93958811	GO:0055085; transmembrane transport | GO:0016020; membrane | GO:0015297; antiporter activity | GO:0015238; drug transmembrane transporter activity | GO:0006855; drug transmembrane transport
GRMZM2G419328_T01	transport.peptides and oligopeptides	peptide transporter PTR2, putative, expressed	AT5G01180.1	PTR5 (PEPTIDE TRANSPORTER 5); dipeptide transporter/ transporter	0.036985669	0	5.051295245	5.317887017	Uniprot/SPTREMBL:B6SY95; Peptide transporter PTR2 | Uniprot/SPTREMBL:B6SXM6; Peptide transporter PTR2 | UniGene:Zm.152096; TSA: Zea mays contig04389 mRNA sequence | RefSeq_peptide:NP_001148128; peptide transporter PTR2 | RefSeq_dna:NM_001154656; peptide transporter PTR2 (LOC100281736) mRNA | GO:0055085; transmembrane transport | GO:0016020; membrane | GO:0006857; oligopeptide transport | GO:00052…
GRMZM2G419328_T02	transport.peptides and oligopeptides	peptide transporter PTR2, putative, expressed	AT5G01180.1	PTR5 (PEPTIDE TRANSPORTER 5); dipeptide transporter/ transporter	0.036985669	0	5.051295245	5.317887017	UniGene:Zm.152096; TSA: Zea mays contig04389 mRNA sequence | GO:0055085; transmembrane transport | GO:0016020; membrane | GO:0006857; oligopeptide transport | GO:0005215; transporter activity
GRMZM2G419328_T03	transport.peptides and oligopeptides	peptide transporter PTR2, putative, expressed	AT5G01180.1	PTR5 (PEPTIDE TRANSPORTER 5); dipeptide transporter/ transporter	0.036985669	0	5.051295245	5.317887017	UniGene:Zm.152096; TSA: Zea mays contig04389 mRNA sequence | GO:0055085; transmembrane transport | GO:0016020; membrane | GO:0006857; oligopeptide transport | GO:0005215; transporter activity
GRMZM2G479703_T01	transport.peptides and oligopeptides	oligopeptide transporter 9, putative, expressed	AT4G10770.1	OPT7 (OLIGOPEPTIDE TRANSPORTER 7); oligopeptide transporter	0.795600455	3.360807968	8.191653222	14.64578133	Uniprot/SPTREMBL:C4J3M6; Putative uncharacterized protein | Uniprot/SPTREMBL:C0PCE0; Putative uncharacterized protein | UniGene:Zm.26385; Hypothetical protein LOC100383021 | RefSeq_peptide:NP_001169171; hypothetical protein LOC100383021 | RefSeq_dna:NM_001175700; hypothetical protein LOC100383021 (LOC100383021) mRNA | GO:0055085; transmembrane transport | EntrezGene:100383021; hypothetical protei…
GRMZM2G092780_T01	transport.phosphate	inorganic phosphate transporter 2-1, chloroplast precursor, putative, expressed	AT3G26570.2	PHT2;1 (PHOSPHATE TRANSPORTER 2;1); low affinity phosphate transmembrane transporter	2.546654619	20.1392129	64.46064024	95.50653733	Uniprot/SPTREMBL:C0P4H8; Putative uncharacterized protein | UniGene:Zm.39495; Hypothetical protein LOC100382112 | UniGene:Zm.148357; TSA: Zea mays contig22051 mRNA sequence | RefSeq_peptide:NP_001168344; hypothetical protein LOC100382112 | RefSeq_dna:NM_001174873; hypothetical protein LOC100382112 (LOC100382112) mRNA | GO:0016020; membrane | GO:0006817; phosphate transport | GO:0005315; inorganic…
GRMZM2G021725_T01	transport.potassium	potassium transporter 1, putative, expressed	AT4G13420.1	HAK5 (HIGH AFFINITY K+ TRANSPORTER 5); potassium ion transmembrane transporter/ potassium:sodium symporter	0.395396384	0.518208332	1.500090916	3.04833208	GO:0006813; potassium ion transport | GO:0015079; potassium ion transmembrane transporter activity | GO:0016020; membrane | UniGene:Zm.146901; TSA: Zea mays contig28449 mRNA sequence
GRMZM2G086389_T01	transport.potassium	potassium transporter 11, putative, expressed	AT1G31120.1	KUP10; potassium ion transmembrane transporter	5.788376766	9.74820966	18.14077549	21.90054171	UniGene:Zm.118937; TSA: Zea mays contig24174 mRNA sequence | GO:0016020; membrane | GO:0015450; P-P-bond-hydrolysis-driven protein transmembrane transporter activity | GO:0015079; potassium ion transmembrane transporter activity | GO:0015031; protein transport | GO:0006813; potassium ion transport
GRMZM2G086389_T02	transport.potassium	potassium transporter 11, putative, expressed	AT1G31120.1	KUP10; potassium ion transmembrane transporter	5.788376766	9.74820966	18.14077549	21.90054171	Uniprot/SPTREMBL:B4F8N8; Putative uncharacterized protein | UniGene:Zm.13502; Hypothetical protein LOC100191398 | RefSeq_peptide:NP_001130304; hypothetical protein LOC100191398 | RefSeq_dna:NM_001136832; hypothetical protein LOC100191398 (LOC100191398) mRNA | GO:0016020; membrane | GO:0015079; potassium ion transmembrane transporter activity | GO:0006813; potassium ion transport | EntrezGene:1001…
GRMZM2G004694_T01	transport.sugars	proton myo-inositol cotransporter, putative, expressed	AT3G18830.1	ATPLT5 (POLYOL TRANSPORTER 5); D-ribose transmembrane transporter/ D-xylose transmembrane transporter/ carbohydrate transmembrane transporter/ galactose transmembrane transporter/ glucose transmembrane transporter/ glycerol transmembrane transporter/ mann	0.042843128	2.096281667	5.15800492	10.1577661	UniGene:Zm.21384; TSA: Zea mays contig48933 mRNA sequence | UniGene:Zm.155760; Full-length cDNA clone ZM_BFc0171D09 | UniGene:Zm.139063; TSA: Zea mays contig10630 mRNA sequence | GO:0055085; transmembrane transport | GO:0022891; substrate-specific transmembrane transporter activity | GO:0016021; integral to membrane | GO:0016020; membrane | GO:0006810; transport | GO:0005215; transporter activity
GRMZM2G029153_T01	transport.sugars	sugar carrier protein A, putative, expressed	AT4G02050.1	sugar transporter, putative	4.160559139	4.75473257	4.840532641	13.46118448	Uniprot/SPTREMBL:B8A1E9; Putative uncharacterized protein | Uniprot/SPTREMBL:B6TMZ9; Sugar carrier protein A | Uniprot/SPTREMBL:B4FZ36; Putative uncharacterized protein | RefSeq_peptide:NP_001141959; hypothetical protein LOC100274108 | RefSeq_dna:NM_001148487; hypothetical protein LOC100274108 (LOC100274108) mRNA | GO:0055085; transmembrane transport | GO:0022891; substrate-specific transmembrane…
GRMZM2G034061_T01	transport.sugars	hexose carrier protein HEX6, putative, expressed	AT1G11260.1	STP1 (SUGAR TRANSPORTER 1); carbohydrate transmembrane transporter/ sugar:hydrogen symporter	0.156744232	5.709737702	9.07542315	9.280561118	Uniprot/SPTREMBL:Q6B4G6; Monosaccharide transport protein 4 Fragment | UniGene:Zm.153963; TSA: Zea mays contig35735 mRNA sequence | UniGene:Zm.150192; TSA: Zea mays contig13418 mRNA sequence | UniGene:Zm.145545; TSA: Zea mays contig46487 mRNA sequence | UniGene:Zm.144837; TSA: Zea mays contig51999 mRNA sequence | UniGene:Zm.138955; TSA: Zea mays contig54959 mRNA sequence | GO:0055085; transmembra…
GRMZM2G064437_T01	transport.sugars	proton myo-inositol cotransporter, putative, expressed	AT3G18830.1	ATPLT5 (POLYOL TRANSPORTER 5); D-ribose transmembrane transporter/ D-xylose transmembrane transporter/ carbohydrate transmembrane transporter/ galactose transmembrane transporter/ glucose transmembrane transporter/ glycerol transmembrane transporter/ mann	5.983911032	20.55374345	22.61338417	44.81295763	RefSeq_dna:NM_001138590; hypothetical protein LOC100193474 (LOC100193474) mRNA | RefSeq_peptide:NP_001132062; hypothetical protein LOC100193474 | Uniprot/SPTREMBL:B4FF54; Putative uncharacterized protein | Uniprot/SPTREMBL:B6TDG1; Proton myo-inositol cotransporter | Uniprot/SPTREMBL:C0HH07; Putative uncharacterized protein | GO:0055085; transmembrane transport | GO:0022891; substrate-specific tra…
GRMZM2G301885_T01	transport.sugars	polyol transporter protein 4, putative, expressed	AT2G16120.1	mannitol transporter, putative	8.562031167	25.80322078	64.35788441	65.11225551	GO:0055085; transmembrane transport | GO:0022891; substrate-specific transmembrane transporter activity | GO:0016021; integral to membrane | GO:0016020; membrane | GO:0006810; transport | GO:0005215; transporter activity
GRMZM2G301885_T02	transport.sugars	polyol transporter protein 4, putative, expressed	AT2G16120.1	mannitol transporter, putative	8.562031167	25.80322078	64.35788441	65.11225551	Uniprot/SPTREMBL:B4G088; Putative uncharacterized protein | UniGene:Zm.136895; Hypothetical protein LOC100274325 | RefSeq_peptide:NP_001142160; hypothetical protein LOC100274325 | RefSeq_dna:NM_001148688; hypothetical protein LOC100274325 (LOC100274325) mRNA | GO:0055085; transmembrane transport | GO:0022891; substrate-specific transmembrane transporter activity | GO:0016021; integral to membrane…
GRMZM2G301885_T03	transport.sugars	polyol transporter protein 4, putative, expressed	AT2G16120.1	mannitol transporter, putative	8.562031167	25.80322078	64.35788441	65.11225551	Uniprot/SPTREMBL:B6UEW2; Polyol transporter protein 4 | GO:0055085; transmembrane transport | GO:0022891; substrate-specific transmembrane transporter activity | GO:0016021; integral to membrane | GO:0016020; membrane | GO:0006810; transport | GO:0005215; transporter activity
GRMZM2G034302_T01	transport.sugars.sucrose	sucrose Transporter, putative, expressed	AT2G02860.2	SUT2 (SUCROSE TRANSPORTER 2); carbohydrate transmembrane transporter/ sucrose transmembrane transporter/ sucrose:hydrogen symporter/ sugar:hydrogen symporter	1.539291016	35.19955585	199.4672845	339.3649979	Uniprot/SPTREMBL:Q9SXM0; Sucrose Transporter | Uniprot/SPTREMBL:C4J718; Putative uncharacterized protein | Uniprot/SPTREMBL:C4J697; Putative uncharacterized protein | Uniprot/SPTREMBL:C4J5U5; Putative uncharacterized protein | Uniprot/SPTREMBL:C4J3K4; Putative uncharacterized protein | RefSeq_peptide:NP_001104840; sucrose transporter1 | RefSeq_dna:NM_001111370; sucrose transporter1 (sut1) mRNA | …
GRMZM2G034302_T03	transport.sugars.sucrose	sucrose Transporter, putative, expressed	AT2G02860.2	SUT2 (SUCROSE TRANSPORTER 2); carbohydrate transmembrane transporter/ sucrose transmembrane transporter/ sucrose:hydrogen symporter/ sugar:hydrogen symporter	1.539291016	35.19955585	199.4672845	339.3649979	GO:0005887; integral to plasma membrane | GO:0008515; sucrose transmembrane transporter activity | GO:0015770; sucrose transport
GRMZM2G034302_T04	transport.sugars.sucrose	sucrose Transporter, putative, expressed	AT2G02860.2	SUT2 (SUCROSE TRANSPORTER 2); carbohydrate transmembrane transporter/ sucrose transmembrane transporter/ sucrose:hydrogen symporter/ sugar:hydrogen symporter	1.539291016	35.19955585	199.4672845	339.3649979	Uniprot/SPTREMBL:Q9SXM0; Sucrose Transporter | Uniprot/SPTREMBL:C4J718; Putative uncharacterized protein | Uniprot/SPTREMBL:C4J697; Putative uncharacterized protein | Uniprot/SPTREMBL:C4J5U5; Putative uncharacterized protein | Uniprot/SPTREMBL:C4J3K4; Putative uncharacterized protein | RefSeq_peptide:NP_001104840; sucrose transporter1 | GO:0015770; sucrose transport | GO:0008515; sucrose transmem…
GRMZM2G307561_T03	transport.sugars.sucrose	sucrose transport protein SUC4, putative, expressed	AT1G09960.1	SUT4 (SUCROSE TRANSPORTER 4); carbohydrate transmembrane transporter/ sucrose transmembrane transporter/ sucrose:hydrogen symporter/ sugar:hydrogen symporter	14.96818638	30.12431953	39.3134146	74.16033781	RefSeq_peptide:NP_001137486; sucrose transporter4 | UniGene:Zm.17525; Hypothetical protein LOC100276924 | UniGene:Zm.98112; Sucrose transporter4 | Uniprot/SPTREMBL:Q6GUI0; Sucrose transport protein | Uniprot/SPTREMBL:Q6J2T0; Sucrose transporter SUT4 | RefSeq_dna:NM_001150618; hypothetical protein LOC100276924 (LOC100276924) mRNA | RefSeq_dna:NM_001144014; sucrose transporter4 (sut4) mRNA | GO:001…
GRMZM2G042171_T01	transport.sulphate	low affinity sulphate transporter 3, putative, expressed	AT5G10180.1	AST68; sulfate transmembrane transporter	11.69070941	17.58503451	80.47855428	311.0000827	Uniprot/SPTREMBL:B7ZZJ6; Putative uncharacterized protein | Uniprot/SPTREMBL:B4FEI2; Putative uncharacterized protein | UniGene:Zm.10545; LOC100193294 | GO:0055085; transmembrane transport | GO:0016021; integral to membrane | GO:0016020; membrane | GO:0008272; sulfate transport | GO:0008271; secondary active sulfate transmembrane transporter activity | GO:0006810; transport | GO:0005215; transpor…
GRMZM2G042171_T02	transport.sulphate	low affinity sulphate transporter 3, putative, expressed	AT5G10180.1	AST68; sulfate transmembrane transporter	11.69070941	17.58503451	80.47855428	311.0000827	Uniprot/SPTREMBL:B7ZZJ6; Putative uncharacterized protein | Uniprot/SPTREMBL:B4FEI2; Putative uncharacterized protein | GO:0055085; transmembrane transport | GO:0016021; integral to membrane | GO:0016020; membrane | GO:0008272; sulfate transport | GO:0008271; secondary active sulfate transmembrane transporter activity | GO:0006810; transport | GO:0005215; transporter activity
GRMZM2G158013_T01	transport.sulphate	sulfate transporter 3.5, putative, expressed	AT3G51895.1	SULTR3;1 (SULFATE TRANSPORTER 3;1); secondary active sulfate transmembrane transporter/ sulfate transmembrane transporter/ transporter	2.817643498	5.48376334	9.258579939	16.36275143	Uniprot/SPTREMBL:C0P3Z9; Putative uncharacterized protein | UniGene:Zm.39435; Hypothetical protein LOC100382058 | RefSeq_peptide:NP_001168294; hypothetical protein LOC100382058 | RefSeq_dna:NM_001174823; hypothetical protein LOC100382058 (LOC100382058) mRNA | GO:0055085; transmembrane transport | GO:0016021; integral to membrane | GO:0016020; membrane | EntrezGene:100382058; hypothetical protein …
GRMZM2G096683_T01	transport.sugars	proton myo-inositol cotransporter, putative, expressed	AT3G18830.1	ATPLT5 (POLYOL TRANSPORTER 5); D-ribose transmembrane transporter/ D-xylose transmembrane transporter/ carbohydrate transmembrane transporter/ galactose transmembrane transporter/ glucose transmembrane transporter/ glycerol transmembrane transporter/ mann	0.03246285	1.837540615	10.58366847	21.72884942	UniGene:Zm.64930; Transcribed locus strongly similar to XP_002467638.1 hypothetical protein SORBIDRAFT_01g031360 [Sorghum bicolor] | GO:0055085; transmembrane transport | GO:0046677; response to antibiotic | GO:0022891; substrate-specific transmembrane transporter activity | GO:0016021; integral to membrane | GO:0016020; membrane | GO:0015904; tetracycline transport | GO:0015520; tetracycline:hyd…
GRMZM2G135739_T01	transport.sugars	sugar transport protein 1, putative, expressed	AT1G11260.1	STP1 (SUGAR TRANSPORTER 1); carbohydrate transmembrane transporter/ sugar:hydrogen symporter	4.212706439	5.004503417	7.886557453	14.03526012	Uniprot/SPTREMBL:Q6B4G9; Monosaccharide transport protein 1Sugar transport protein 1 ; | Uniprot/SPTREMBL:C0PHL2; Putative uncharacterized protein | UniGene:Zm.83972; Monosaccharide transporter1 | RefSeq_peptide:NP_001105681; monosaccharide transporter1 | RefSeq_dna:NM_001112211; monosaccharide transporter1 (mstr1) mRNA | GO:0055085; transmembrane transport | GO:0022891; substrate-specific transm…
GRMZM2G138589_T01	transport.sugars	polyol transporter protein 4, putative, expressed	AT3G18830.1	ATPLT5 (POLYOL TRANSPORTER 5); D-ribose transmembrane transporter/ D-xylose transmembrane transporter/ carbohydrate transmembrane transporter/ galactose transmembrane transporter/ glucose transmembrane transporter/ glycerol transmembrane transporter/ mann	2.098160925	3.829017097	8.548452825	12.00669503	Uniprot/SPTREMBL:B7ZZ55; Putative uncharacterized protein | Uniprot/SPTREMBL:B6TSL9; Polyol transporter protein 4 | Uniprot/SPTREMBL:B4FVV7; Putative uncharacterized protein | UniGene:Zm.64472; LOC100284344 | RefSeq_peptide:NP_001150711; LOC100284344 | RefSeq_dna:NM_001157239; LOC100284344 (IDP2462) mRNA | GO:0055085; transmembrane transport | GO:0022891; substrate-specific transmembrane transpor…
GRMZM2G160069_T01	transport.sugars	proton myo-inositol cotransporter, putative, expressed	AT1G30220.1	INT2 (INOSITOL TRANSPORTER 2); carbohydrate transmembrane transporter/ sugar:hydrogen symporter	1.217056697	4.932721831	9.830080784	9.919890655	Uniprot/SPTREMBL:C0PK36; Putative uncharacterized protein | UniGene:Zm.41812; Hypothetical protein LOC100383930 | RefSeq_peptide:NP_001170020; hypothetical protein LOC100383930 | RefSeq_dna:NM_001176549; hypothetical protein LOC100383930 (LOC100383930) mRNA | GO:0055085; transmembrane transport | GO:0022891; substrate-specific transmembrane transporter activity | GO:0017153; sodium:dicarboxylate …
GRMZM2G087901_T01	transport.sugars.sucrose	sucrose Transporter, putative, expressed	AT2G02860.1	SUT2 (SUCROSE TRANSPORTER 2); carbohydrate transmembrane transporter/ sucrose transmembrane transporter/ sucrose:hydrogen symporter/ sugar:hydrogen symporter	1.002904613	2.637257581	12.83947158	32.46948332	UniGene:Zm.99434; Transcribed locus strongly similar to NP_001104840.1 sucrose transporter1 [Zea mays] | UniGene:Zm.94466; TSA: Zea mays contig49891 mRNA sequence | GO:0015770; sucrose transport | GO:0008515; sucrose transmembrane transporter activity | GO:0005887; integral to plasma membrane
GRMZM2G087901_T02	transport.sugars.sucrose	sucrose Transporter, putative, expressed	AT2G02860.1	SUT2 (SUCROSE TRANSPORTER 2); carbohydrate transmembrane transporter/ sucrose transmembrane transporter/ sucrose:hydrogen symporter/ sugar:hydrogen symporter	1.002904613	2.637257581	12.83947158	32.46948332	UniGene:Zm.99434; Transcribed locus strongly similar to NP_001104840.1 sucrose transporter1 [Zea mays] | UniGene:Zm.94466; TSA: Zea mays contig49891 mRNA sequence | UniGene:Zm.72711; Sucrose transporter1 | UniGene:Zm.155587; TSA: Zea mays contig49899 mRNA sequence | GO:0015770; sucrose transport | GO:0008515; sucrose transmembrane transporter activity | GO:0005887; integral to plasma membrane
GRMZM2G159632_T01	transport.sulphate	sulfate transporter 1.2, putative, expressed	AT1G22150.1	SULTR1;3; sulfate transmembrane transporter	0.491861365	3.700521667	6.700837643	13.26650453	RefSeq_dna:NM_001111580; sulfate permease1 (sfp1) mRNA | RefSeq_peptide:NP_001105050; sulfate permease1 | UniGene:Zm.626; Sulfate permease1 | Uniprot/SPTREMBL:A7YF68; Sulfate transporter | Uniprot/SPTREMBL:O48889; Sulfate permease Fragment | Uniprot/SPTREMBL:Q93YY1; Sulfate transporter Fragment | Uniprot/SPTREMBL:Q94ES1; Putative high affinity sulfate transporter Fragment | Uniprot/SPTREMBL:Q9AT1…
GRMZM2G395114_T01	transport.sulphate	sulfate transporter 3.3, putative, expressed	AT1G23090.1	AST91 (SULFATE TRANSPORTER 91); sulfate transmembrane transporter	43.23075624	73.12433797	237.4990069	333.7520034	Uniprot/SPTREMBL:C0PH01; Putative uncharacterized protein | UniGene:Zm.10614; Hypothetical protein LOC100383552 | RefSeq_peptide:NP_001169671; hypothetical protein LOC100383552 | RefSeq_dna:NM_001176200; hypothetical protein LOC100383552 (LOC100383552) mRNA | GO:0055085; transmembrane transport | GO:0016021; integral to membrane | GO:0016020; membrane | GO:0008272; sulfate transport | GO:0008271;…
GRMZM2G096365_T01	transport.unspecified anions	chloride channel protein CLC-c, putative, expressed	AT5G49890.1	CLC-C (CHLORIDE CHANNEL C); anion channel/ voltage-gated chloride channel	2.237089765	6.852070104	10.70852931	12.79824314	Uniprot/SPTREMBL:C0PMD9; Putative uncharacterized protein | UniGene:Zm.66745; Hypothetical protein LOC100384199 | UniGene:Zm.41256; Transcribed locus strongly similar to XP_002447895.1 hypothetical protein SORBIDRAFT_06g017570 [Sorghum bicolor] | RefSeq_peptide:NP_001170245; hypothetical protein LOC100384199 | RefSeq_dna:NM_001176774; hypothetical protein LOC100384199 (LOC100384199) mRNA | GO:005…
GRMZM2G096365_T02	transport.unspecified anions	chloride channel protein CLC-c, putative, expressed	AT5G49890.1	CLC-C (CHLORIDE CHANNEL C); anion channel/ voltage-gated chloride channel	2.237089765	6.852070104	10.70852931	12.79824314	RefSeq_peptide:NP_001170245; hypothetical protein LOC100384199 | UniGene:Zm.41256; Transcribed locus strongly similar to XP_002447895.1 hypothetical protein SORBIDRAFT_06g017570 [Sorghum bicolor] | UniGene:Zm.66745; Hypothetical protein LOC100384199 | Uniprot/SPTREMBL:C0PMD9; Putative uncharacterized protein | RefSeq_dna:NM_001176774; hypothetical protein LOC100384199 (LOC100384199) mRNA | GO:005…
GRMZM2G096365_T03	transport.unspecified anions	chloride channel protein CLC-c, putative, expressed	AT5G49890.1	CLC-C (CHLORIDE CHANNEL C); anion channel/ voltage-gated chloride channel	2.237089765	6.852070104	10.70852931	12.79824314	RefSeq_peptide:NP_001170245; hypothetical protein LOC100384199 | UniGene:Zm.41256; Transcribed locus strongly similar to XP_002447895.1 hypothetical protein SORBIDRAFT_06g017570 [Sorghum bicolor] | UniGene:Zm.66745; Hypothetical protein LOC100384199 | Uniprot/SPTREMBL:C0PMD9; Putative uncharacterized protein | RefSeq_dna:NM_001176774; hypothetical protein LOC100384199 (LOC100384199) mRNA | GO:005…
GRMZM2G397836_T01	transport.unspecified anions	chloride channel protein CLC-d, putative, expressed	AT5G26240.1	CLC-D (CHLORIDE CHANNEL D); anion channel/ voltage-gated chloride channel	7.34127198	8.839614627	10.98531262	15.02563629	UniGene:Zm.26334; Full-length cDNA clone ZM_BFb0240N15 | UniGene:Zm.154291; TSA: Zea mays contig34279 mRNA sequence | UniGene:Zm.124830; TSA: Zea mays contig57700 mRNA sequence | GO:0055085; transmembrane transport | GO:0016020; membrane | GO:0006821; chloride transport | GO:0005247; voltage-gated chloride channel activity | GO:0005216; ion channel activity
GRMZM2G397836_T02	transport.unspecified anions	chloride channel protein CLC-d, putative, expressed	AT5G26240.1	CLC-D (CHLORIDE CHANNEL D); anion channel/ voltage-gated chloride channel	7.34127198	8.839614627	10.98531262	15.02563629	UniGene:Zm.154291; TSA: Zea mays contig34279 mRNA sequence | GO:0055085; transmembrane transport | GO:0016020; membrane | GO:0006821; chloride transport | GO:0005247; voltage-gated chloride channel activity | GO:0005216; ion channel activity
GRMZM2G397836_T03	transport.unspecified anions	chloride channel protein CLC-d, putative, expressed	AT5G26240.1	CLC-D (CHLORIDE CHANNEL D); anion channel/ voltage-gated chloride channel	7.34127198	8.839614627	10.98531262	15.02563629	UniGene:Zm.154291; TSA: Zea mays contig34279 mRNA sequence | GO:0055085; transmembrane transport | GO:0016020; membrane | GO:0006821; chloride transport | GO:0005247; voltage-gated chloride channel activity | GO:0005216; ion channel activity
GRMZM2G037342_T01	transport.unspecified cations	sodium/hydrogen exchanger 2, putative, expressed	AT5G27150.1	NHX1 (NA+/H+ EXCHANGER); protein binding / sodium ion transmembrane transporter/ sodium:hydrogen antiporter	6.70503752	18.53705852	45.45377851	56.3054791	GO:0055085; transmembrane transport | GO:0016021; integral to membrane | GO:0016020; membrane | GO:0015385; sodium:hydrogen antiporter activity | GO:0015299; solute:hydrogen antiporter activity | GO:0006885; regulation of pH | GO:0006814; sodium ion transport | GO:0006812; cation transport
GRMZM2G037342_T02	transport.unspecified cations	sodium/hydrogen exchanger 2, putative, expressed	AT5G27150.1	NHX1 (NA+/H+ EXCHANGER); protein binding / sodium ion transmembrane transporter/ sodium:hydrogen antiporter	6.70503752	18.53705852	45.45377851	56.3054791	RefSeq_dna:NM_001148643; hypothetical protein LOC100274279 (LOC100274279) mRNA | RefSeq_peptide:NP_001142115; hypothetical protein LOC100274279 | Uniprot/SPTREMBL:B4FZY1; Sodium/hydrogen exchanger | Uniprot/SPTREMBL:B6U2S2; Sodium/hydrogen exchanger | Uniprot/SPTREMBL:C4J1R2; Sodium/hydrogen exchanger | GO:0055085; transmembrane transport | GO:0016021; integral to membrane | GO:0015385; sodium:hy…
GRMZM2G066923_T01	transport.unspecified cations	nucleoside transporter, putative, expressed	AT4G05120.1	FUR1 (FUDR RESISTANT 1); nucleoside transmembrane transporter	1.419140987	5.600312206	6.688854029	8.138809153	Uniprot/SPTREMBL:B6U145; Nucleoside transporter | Uniprot/SPTREMBL:B4FZG7; Putative uncharacterized protein | UniGene:Zm.98836; Nucleoside transporter | RefSeq_peptide:NP_001151494; nucleoside transporter | RefSeq_dna:NM_001158022; nucleoside transporter (LOC100285127) mRNA | GO:0016020; membrane | GO:0006810; transport | GO:0005337; nucleoside transmembrane transporter activity | EntrezGene:1002…
GRMZM2G066923_T03	transport.unspecified cations	nucleoside transporter, putative, expressed	AT4G05120.1	FUR1 (FUDR RESISTANT 1); nucleoside transmembrane transporter	1.419140987	5.600312206	6.688854029	8.138809153	Uniprot/SPTREMBL:B6U145; Nucleoside transporter | Uniprot/SPTREMBL:B4FZG7; Putative uncharacterized protein | RefSeq_peptide:NP_001151494; nucleoside transporter | GO:0016020; membrane | GO:0006810; transport | GO:0005337; nucleoside transmembrane transporter activity | EntrezGene:100285127; nucleoside transporter
GRMZM2G339122_T01	cell wall.modification	alpha-expansin 10 precursor, putative, expressed	AT1G69530.2	ATEXPA1 (ARABIDOPSIS THALIANA EXPANSIN A1)	12.1574189	73.03381318	70.39574293	2.771638868	Uniprot/SPTREMBL:Q94KT7; Alpha-expansin 1Alpha-expansin 10Putative uncharacterized protein Precursor ;; | UniGene:Zm.665; Alpha expansin1 | RefSeq_peptide:NP_001105040; alpha expansin1 | RefSeq_dna:NM_001111570; alpha expansin1 (expa1) mRNA | MaizeGDB_GenBank:EU958648; product:alpha-expansin 10 precursor | MaizeGDB_GenBank:AY104146; | GO:0016021; integral to membrane | GO:0015450; P-P-bond-hydrol…
GRMZM2G339122_T02	cell wall.modification	alpha-expansin 10 precursor, putative, expressed	AT1G69530.2	ATEXPA1 (ARABIDOPSIS THALIANA EXPANSIN A1)	12.1574189	73.03381318	70.39574293	2.771638868	GO:0016021; integral to membrane | GO:0015450; P-P-bond-hydrolysis-driven protein transmembrane transporter activity | GO:0009664; plant-type cell wall organization | GO:0009306; protein secretion | GO:0005576; extracellular region
GRMZM2G021055_T01	development.unspecified	transparent testa 12 protein, putative, expressed	AT1G47530.1	ripening-responsive protein, putative	2.212350006	17.51080347	4.049675955	0.518095363	RefSeq_peptide:NP_001143129; hypothetical protein LOC100275607 | RefSeq_peptide:NP_001152910; hypothetical protein LOC100275776 | UniGene:Zm.137930; Hypothetical protein LOC100275776 | UniGene:Zm.26853; Hypothetical protein LOC100275607 | Uniprot/SPTREMBL:B4FMA4; Putative uncharacterized protein | Uniprot/SPTREMBL:B6SWI0; Putative uncharacterized protein | Uniprot/SPTREMBL:B6SZ59; Putative unchar…
GRMZM2G106588_T01	misc.oxidases - copper, flavone etc.	disulfide oxidoreductase/ monooxygenase/ oxidoreductase, putative	AT5G61290.1	flavin-containing monooxygenase family protein / FMO family protein	2.878732549	15.4382929	5.620004218	2.367290134	UniGene:Zm.99591; Full-length cDNA clone ZM_BFc0099C20 | GO:0055114; oxidation reduction | GO:0050661; NADP or NADPH binding | GO:0050660; FAD binding | GO:0016491; oxidoreductase activity | GO:0008324; cation transmembrane transporter activity | GO:0006813; potassium ion transport | GO:0004499; flavin-containing monooxygenase activity
GRMZM2G106588_T02	misc.oxidases - copper, flavone etc.	disulfide oxidoreductase/ monooxygenase/ oxidoreductase, putative	AT5G61290.1	flavin-containing monooxygenase family protein / FMO family protein	2.878732549	15.4382929	5.620004218	2.367290134	GO:0055114; oxidation reduction | GO:0050661; NADP or NADPH binding | GO:0050660; FAD binding | GO:0016491; oxidoreductase activity | GO:0008324; cation transmembrane transporter activity | GO:0006813; potassium ion transport | GO:0004499; flavin-containing monooxygenase activity
GRMZM2G051949_T01	not assigned	bark storage protein A precursor, putative, expressed	AT4G24340.1	phosphorylase family protein	3.274959772	69.21237923	26.6659269	2.419965141	Uniprot/SPTREMBL:C0HE08; Putative uncharacterized protein | UniGene:Zm.152023; TSA: Zea mays contig04740 mRNA sequence | GO:0055085; transmembrane transport | GO:0016020; membrane | GO:0009116; nucleoside metabolic process | GO:0006810; transport | GO:0005215; transporter activity | GO:0003824; catalytic activity
GRMZM2G051949_T02	not assigned	bark storage protein A precursor, putative, expressed	AT4G24340.1	phosphorylase family protein	3.274959772	69.21237923	26.6659269	2.419965141	Uniprot/SPTREMBL:C0HFB9; Putative uncharacterized protein | UniGene:Zm.152023; TSA: Zea mays contig04740 mRNA sequence | GO:0055085; transmembrane transport | GO:0016020; membrane | GO:0006810; transport | GO:0005215; transporter activity
GRMZM2G051949_T03	not assigned	bark storage protein A precursor, putative, expressed	AT4G24340.1	phosphorylase family protein	3.274959772	69.21237923	26.6659269	2.419965141	UniGene:Zm.20638; Hypothetical protein LOC100384486 | UniGene:Zm.152023; TSA: Zea mays contig04740 mRNA sequence | RefSeq_dna:NM_001177016; hypothetical protein LOC100384486 (LOC100384486) mRNA | GO:0055085; transmembrane transport | GO:0016020; membrane | GO:0006810; transport | GO:0005215; transporter activity
GRMZM2G140651_T03	protein.degradation.ubiquitin.E3.RING	RING-H2 finger protein ATL1Q, putative, expressed	AT1G74410.1	zinc finger (C3HC4-type RING finger) family protein	6.480850577	31.96413313	8.183356737	3.554527957	Uniprot/SPTREMBL:C4IZN8; Putative uncharacterized protein | GO:0055085; transmembrane transport | GO:0016020; membrane | GO:0006821; chloride transport | GO:0005247; voltage-gated chloride channel activity
GRMZM2G140651_T02	protein.degradation.ubiquitin.E3.RING	RING-H2 finger protein ATL1Q, putative, expressed	AT1G74410.1	zinc finger (C3HC4-type RING finger) family protein	6.480850577	31.96413313	8.183356737	3.554527957	RefSeq_peptide:NP_001150758; RING-H2 finger protein ATL1Q | UniGene:Zm.131840; RING-H2 finger protein ATL1Q | Uniprot/SPTREMBL:B6SM04; Putative uncharacterized proteinRING-H2 finger protein ATL1Q ; | Uniprot/SPTREMBL:B6TML2; RING-H2 finger protein ATL1Q | Uniprot/SPTREMBL:B6TT13; RING-H2 finger protein ATL1Q | RefSeq_dna:NM_001157286; RING-H2 finger protein ATL1Q (LOC100284391) mRNA | GO:0055085;…
GRMZM2G140651_T04	protein.degradation.ubiquitin.E3.RING	RING-H2 finger protein ATL1Q, putative, expressed	AT1G74410.1	zinc finger (C3HC4-type RING finger) family protein	6.480850577	31.96413313	8.183356737	3.554527957	Uniprot/SPTREMBL:B4FCV2; Putative uncharacterized protein | UniGene:Zm.66631; LOC100192846 | RefSeq_peptide:NP_001131508; hypothetical protein LOC100192846 | RefSeq_dna:NM_001138036; LOC100192846 (pco127689) mRNA | GO:0055085; transmembrane transport | GO:0016020; membrane | GO:0006821; chloride transport | GO:0005247; voltage-gated chloride channel activity | EntrezGene:100192846; LOC100192846
GRMZM2G047476_T01	signalling.calcium	calmodulin binding protein, putative, expressed	AT3G15050.1	IQD10 (IQ-domain 10); calmodulin binding	8.897940444	26.77406319	10.00795766	6.970834612	GO:0015986; ATP synthesis coupled proton transport | GO:0015078; hydrogen ion transmembrane transporter activity | GO:0006412; translation | GO:0005840; ribosome | GO:0005622; intracellular | GO:0003735; structural constituent of ribosome | GO:0033179; proton-transporting V-type ATPase V0 domain
GRMZM2G047476_T03	signalling.calcium	calmodulin binding protein, putative, expressed	AT3G15050.1	IQD10 (IQ-domain 10); calmodulin binding	8.897940444	26.77406319	10.00795766	6.970834612	GO:0003735; structural constituent of ribosome | GO:0005622; intracellular | GO:0005840; ribosome | GO:0006412; translation | GO:0015078; hydrogen ion transmembrane transporter activity | GO:0015986; ATP synthesis coupled proton transport | GO:0033179; proton-transporting V-type ATPase V0 domain
GRMZM2G080450_T01	transport.ABC transporters and multidrug resistance systems	antiporter/ drug transporter, putative, expressed	AT4G38380.1	antiporter/ drug transporter	20.96735958	68.1053951	25.07476602	12.35833247	RefSeq_dna:NM_001138423; LOC100193278 (cl19958_1) mRNA | RefSeq_peptide:NP_001131895; hypothetical protein LOC100193278 | UniGene:Zm.138131; LOC100193278 | Uniprot/SPTREMBL:B4FEG3; Putative uncharacterized protein | Uniprot/SPTREMBL:B8A177; Putative uncharacterized protein | GO:0055085; transmembrane transport | GO:0017153; sodium:dicarboxylate symporter activity | GO:0016020; membrane | EntrezGe…
GRMZM2G085111_T01	transport.ABC transporters and multidrug resistance systems	multidrug resistance protein 17, putative, expressed	AT3G62150.1	PGP21 (P-GLYCOPROTEIN 21); ATPase, coupled to transmembrane movement of substances	10.55177217	18.16454634	21.27269288	9.605504446	GO:0055085; transmembrane transport | GO:0042626; ATPase activity coupled to transmembrane movement of substances | GO:0016021; integral to membrane | GO:0006810; transport | GO:0006334; nucleosome assembly | GO:0005634; nucleus | GO:0005524; ATP binding | GO:0003677; DNA binding | GO:0000786; nucleosome
GRMZM2G085111_T02	transport.ABC transporters and multidrug resistance systems	multidrug resistance protein 17, putative, expressed	AT3G62150.1	PGP21 (P-GLYCOPROTEIN 21); ATPase, coupled to transmembrane movement of substances	10.55177217	18.16454634	21.27269288	9.605504446	GO:0055085; transmembrane transport | RefSeq_dna:NM_001139309; LOC100194270 (pco084581a) mRNA | RefSeq_peptide:NP_001132781; hypothetical protein LOC100194270 | UniGene:Zm.94453; LOC100194270 | Uniprot/SPTREMBL:B4FI32; Putative uncharacterized protein | Uniprot/SPTREMBL:C0HGQ6; Putative uncharacterized protein | GO:0042626; ATPase activity coupled to transmembrane movement of substances | GO:0017…
GRMZM2G042027_T04	transport.metabolite transporters at the mitochondrial membrane	mitochondrial carrier C12B10.09, putative, expressed	AT4G39460.1	SAMC1 (S-ADENOSYLMETHIONINE CARRIER 1); S-adenosylmethionine transmembrane transporter/ binding	14.93417665	30.65811938	17.87669309	9.673923986	Uniprot/SPTREMBL:C0PKD1; Putative uncharacterized protein | GO:0055085; transmembrane transport | GO:0016020; membrane | GO:0006810; transport | GO:0005743; mitochondrial inner membrane | GO:0005488; binding | GO:0005215; transporter activity
GRMZM2G042027_T01	transport.metabolite transporters at the mitochondrial membrane	mitochondrial carrier C12B10.09, putative, expressed	AT4G39460.1	SAMC1 (S-ADENOSYLMETHIONINE CARRIER 1); S-adenosylmethionine transmembrane transporter/ binding	14.93417665	30.65811938	17.87669309	9.673923986	Uniprot/SPTREMBL:B6U3K8; Mitochondrial carrier C12B10.09 | Uniprot/SPTREMBL:B6TYC7; Mitochondrial carrier C12B10.09 | Uniprot/SPTREMBL:B4F887; Putative uncharacterized protein | UniGene:Zm.7892; LOC100191279 | RefSeq_peptide:NP_001130185; hypothetical protein LOC100191279 | GO:0055085; transmembrane transport | GO:0016020; membrane | GO:0006810; transport | GO:0005743; mitochondrial inner membran…
GRMZM2G042027_T02	transport.metabolite transporters at the mitochondrial membrane	mitochondrial carrier C12B10.09, putative, expressed	AT4G39460.1	SAMC1 (S-ADENOSYLMETHIONINE CARRIER 1); S-adenosylmethionine transmembrane transporter/ binding	14.93417665	30.65811938	17.87669309	9.673923986	RefSeq_peptide:NP_001130185; hypothetical protein LOC100191279 | Uniprot/SPTREMBL:B4F887; Putative uncharacterized protein | Uniprot/SPTREMBL:B6TYC7; Mitochondrial carrier C12B10.09 | Uniprot/SPTREMBL:B6U3K8; Mitochondrial carrier C12B10.09 | GO:0055085; transmembrane transport | GO:0016020; membrane | GO:0006810; transport | GO:0005743; mitochondrial inner membrane | GO:0005488; binding | Entrez…
GRMZM2G042027_T03	transport.metabolite transporters at the mitochondrial membrane	mitochondrial carrier C12B10.09, putative, expressed	AT4G39460.1	SAMC1 (S-ADENOSYLMETHIONINE CARRIER 1); S-adenosylmethionine transmembrane transporter/ binding	14.93417665	30.65811938	17.87669309	9.673923986	RefSeq_peptide:NP_001130185; hypothetical protein LOC100191279 | Uniprot/SPTREMBL:B4F887; Putative uncharacterized protein | Uniprot/SPTREMBL:B6TYC7; Mitochondrial carrier C12B10.09 | Uniprot/SPTREMBL:B6U3K8; Mitochondrial carrier C12B10.09 | RefSeq_dna:NM_001136713; LOC100191279 (si618001e02) mRNA | GO:0055085; transmembrane transport | GO:0016020; membrane | GO:0006810; transport | GO:0005743; …
GRMZM2G042027_T05	transport.metabolite transporters at the mitochondrial membrane	mitochondrial carrier C12B10.09, putative, expressed	AT4G39460.1	SAMC1 (S-ADENOSYLMETHIONINE CARRIER 1); S-adenosylmethionine transmembrane transporter/ binding	14.93417665	30.65811938	17.87669309	9.673923986	Uniprot/SPTREMBL:B6U3K8; Mitochondrial carrier C12B10.09 | Uniprot/SPTREMBL:B6TYC7; Mitochondrial carrier C12B10.09 | Uniprot/SPTREMBL:B4F887; Putative uncharacterized protein | RefSeq_peptide:NP_001130185; hypothetical protein LOC100191279 | GO:0055085; transmembrane transport | GO:0016020; membrane | GO:0006810; transport | GO:0005743; mitochondrial inner membrane | GO:0005488; binding | Entrez…
GRMZM2G014454_T01	transport.metal	metal tolerance protein C3, putative, expressed	AT2G39450.1	MTP11; cation transmembrane transporter/ manganese ion transmembrane transporter/ manganese:hydrogen antiporter	10.98667629	24.37918923	15.77166442	10.86268365	UniGene:Zm.155753; Transcribed locus strongly similar to NP_001044741.1 Os01g0837800 [Oryza sativa Japonica Group] | GO:0055085; transmembrane transport | GO:0016020; membrane | GO:0008324; cation transmembrane transporter activity | GO:0006812; cation transport
GRMZM2G015955_T01	transport.metal	zinc transporter 4, chloroplast precursor, putative, expressed	AT4G33020.1	ZIP9; cation transmembrane transporter/ metal ion transmembrane transporter	11.21691389	20.47380414	14.83804175	10.72771244	Uniprot/SPTREMBL:C0HIK6; Putative uncharacterized protein | Uniprot/SPTREMBL:B6TQ79; Zinc transporter 4 | UniGene:Zm.21545; Zinc transporter 4 | RefSeq_peptide:NP_001150490; zinc transporter 4 | RefSeq_dna:NM_001157018; zinc transporter 4 (LOC100284121) mRNA | GO:0055085; transmembrane transport | GO:0046873; metal ion transmembrane transporter activity | GO:0030001; metal ion transport | EntrezG…
GRMZM2G414813_T02	transport.misc	permease I, putative, expressed	AT5G62890.3	permease, putative	14.27292252	67.0931406	28.08272726	14.14535556	Uniprot/SPTREMBL:C4JA61; Putative uncharacterized protein | Uniprot/SPTREMBL:B6TEJ2; Permease I | Uniprot/SPTREMBL:B4F8S3; Putative uncharacterized protein | UniGene:Zm.82410; LOC100272944 | RefSeq_peptide:NP_001140868; hypothetical protein LOC100272944 | RefSeq_dna:NM_001147396; LOC100272944 (TIDP3720) mRNA | GO:0055085; transmembrane transport | GO:0016020; membrane | GO:0006810; transport | GO…
GRMZM2G414813_T03	transport.misc	permease I, putative, expressed	AT5G62890.3	permease, putative	14.27292252	67.0931406	28.08272726	14.14535556	GO:0055085; transmembrane transport | GO:0016020; membrane | GO:0006810; transport | GO:0005215; transporter activity
GRMZM2G058910_T01	transport.p- and v-ATPases	vacuolar ATP synthase 91 kDa subunit, putative, expressed	AT4G39080.1	VHA-A3 (VACUOLAR PROTON ATPASE A3); ATPase	49.56763311	56.10646882	59.89508361	47.88699204	Uniprot/SPTREMBL:C0HIP8; Putative uncharacterized protein | UniGene:Zm.85215; Hypothetical protein LOC100381766 | UniGene:Zm.35989; Transcribed locus | UniGene:Zm.150375; TSA: Zea mays contig12492 mRNA sequence | UniGene:Zm.124480; Clone 235417 mRNA sequence | GO:0033177; proton-transporting two-sector ATPase complex proton-transporting domain | GO:0015986; ATP synthesis coupled proton transport …
GRMZM2G143998_T01	transport.peptides and oligopeptides	peptide transporter PTR2, putative, expressed	AT2G37900.1	proton-dependent oligopeptide transport (POT) family protein	3.050906744	6.510119177	6.754069255	1.933351623	GO:0005215; transporter activity | GO:0006810; transport | GO:0006857; oligopeptide transport | GO:0016020; membrane | GO:0055085; transmembrane transport | UniGene:Zm.129297; Clone 358934 mRNA sequence Uniprot/SPTREMBL:C0HH87; Putative uncharacterized protein | Uniprot/SPTREMBL:B6UHB6; Histone H1 | Uniprot/SPTREMBL:B4FD93; Putative uncharacterized protein | UniGene:Zm.67235; H1 histone | GO:0030…
GRMZM2G137985_T01	transport.porins	outer mitochondrial membrane protein porin, putative, expressed	AT5G67500.1	VDAC2 (VOLTAGE DEPENDENT ANION CHANNEL 2); voltage-gated anion channel	47.29412459	50.11186582	51.90721831	34.50210817	Uniprot/SPTREMBL:C4IYM7; Putative uncharacterized protein | GO:0055085; transmembrane transport | GO:0008308; voltage-gated anion channel activity | GO:0006820; anion transport | GO:0005741; mitochondrial outer membrane
GRMZM2G120163_T01	transport.potassium	potassium transporter 8, putative, expressed	AT1G70300.1	KUP6; potassium ion transmembrane transporter	0.978295911	3.226053407	1.914835679	0.446627892	RefSeq_dna:NM_001177278; hypothetical protein LOC100384841 (LOC100384841) mRNA | RefSeq_peptide:NP_001170749; hypothetical protein LOC100384841 | UniGene:Zm.139960; Hypothetical protein LOC100384841 | Uniprot/SPTREMBL:C4J0J3; Putative uncharacterized protein | GO:0055114; oxidation reduction | GO:0016020; membrane | GO:0015079; potassium ion transmembrane transporter activity | GO:0006813; potass…
GRMZM2G085301_T01	transport.sugars	sugar transporter family protein, putative, expressed	AT5G59250.1	sugar transporter family protein	14.02437979	31.00213788	22.33939246	8.604237025	RefSeq_dna:NM_001148456; hypothetical protein LOC100274077 (LOC100274077) mRNA | RefSeq_peptide:NP_001141928; hypothetical protein LOC100274077 | UniGene:Zm.151767; TSA: Zea mays contig05993 mRNA sequence | UniGene:Zm.33120; Hypothetical protein LOC100274077 | Uniprot/SPTREMBL:B4FYX8; Putative uncharacterized protein | GO:0055085; transmembrane transport | GO:0022891; substrate-specific transmemb…
GRMZM2G171702_T01	hormone metabolism.auxin.signal transduction	auxin efflux carrier component 1b, putative, expressed	AT1G73590.1	PIN1 (PIN-FORMED 1); transporter	6.092062167	1.080691791	1.125634782	2.894504614	Uniprot/SPTREMBL:C4J1S5; Putative uncharacterized protein | Uniprot/SPTREMBL:B6U8W0; Auxin efflux carrier component 1c | UniGene:Zm.98279; Transcribed locus strongly similar to NP_001152108.1 LOC100285745 [Zea mays] | RefSeq_peptide:NP_001152108; LOC100285745 | RefSeq_dna:NM_001158636; LOC100285745 (cl464_-1) mRNA | GO:0055085; transmembrane transport | GO:0016021; integral to membrane | EntrezGe…
GRMZM2G171702_T02	hormone metabolism.auxin.signal transduction	auxin efflux carrier component 1b, putative, expressed	AT1G73590.1	PIN1 (PIN-FORMED 1); transporter	6.092062167	1.080691791	1.125634782	2.894504614	GO:0055085; transmembrane transport | GO:0016021; integral to membrane
GRMZM2G171702_T03	hormone metabolism.auxin.signal transduction	auxin efflux carrier component 1b, putative, expressed	AT1G73590.1	PIN1 (PIN-FORMED 1); transporter	6.092062167	1.080691791	1.125634782	2.894504614	GO:0016021; integral to membrane | GO:0055085; transmembrane transport | UniGene:Zm.98279; Transcribed locus strongly similar to NP_001152108.1 LOC100285745 [Zea mays]
GRMZM2G157018_T01	mitochondrial electron transport / ATP synthesis.F1-ATPase	ATP synthase D chain, mitochondrial, putative, expressed	AT3G52300.1	ATPQ (ATP SYNTHASE D CHAIN, MITOCHONDRIAL); hydrogen ion transmembrane transporter	295.0258138	193.9172678	211.7700848	228.6440762	Uniprot/SPTREMBL:B4FS99; ATP synthase D chain mitochondrialPutative uncharacterized protein ; | RefSeq_peptide:NP_001150316; ATP synthase D chain mitochondrial | RefSeq_dna:NM_001156844; ATP synthase D chain mitochondrial (LOC100283946) nuclear gene encoding mitochondrial protein mRNA | GO:0015986; ATP synthesis coupled proton transport | GO:0015078; hydrogen ion transmembrane transporter activit…
GRMZM2G444748_T02	RNA.regulation of transcription.bZIP transcription factor family	ocs element-binding factor 1, putative, expressed	AT4G34590.1	GBF6 (G-BOX BINDING FACTOR 6); DNA binding / protein heterodimerization/ transcription factor	21.05875821	6.083481219	9.821324163	20.60290323	GO:0046983; protein dimerization activity | GO:0043565; sequence-specific DNA binding | GO:0016068; type I hypersensitivity | GO:0016020; membrane | GO:0006810; transport | GO:0006355; regulation of transcription DNA-dependent | GO:0005634; nucleus | GO:0005337; nucleoside transmembrane transporter activity | GO:0003700; transcription factor activity
GRMZM2G444748_T01	RNA.regulation of transcription.bZIP transcription factor family	ocs element-binding factor 1, putative, expressed	AT4G34590.1	GBF6 (G-BOX BINDING FACTOR 6); DNA binding / protein heterodimerization/ transcription factor	21.05875821	6.083481219	9.821324163	20.60290323	GO:0043565; sequence-specific DNA binding | GO:0046983; protein dimerization activity | RefSeq_dna:NM_001176137; hypothetical protein LOC100383489 (LOC100383489) mRNA | UniGene:Zm.75219; Hypothetical protein LOC100383489 | GO:0016068; type I hypersensitivity | GO:0016020; membrane | GO:0006810; transport | GO:0006355; regulation of transcription DNA-dependent | GO:0005634; nucleus | GO:0005337; n…
GRMZM2G004414_T01	transport.calcium	sodium/potassium/calcium exchanger 6 precursor, putative, expressed	AT1G08960.1	CAX11; calcium:sodium antiporter/ cation:cation antiporter	7.01437077	3.13909598	3.274573911	6.509441974	Uniprot/SPTREMBL:B8A3Q5; Putative uncharacterized protein | Uniprot/SPTREMBL:B4FQD4; Putative uncharacterized protein | UniGene:Zm.18726; Hypothetical protein LOC100272741 | RefSeq_peptide:NP_001140666; hypothetical protein LOC100272741 | RefSeq_dna:NM_001147194; hypothetical protein LOC100272741 (LOC100272741) mRNA | GO:0055085; transmembrane transport | GO:0016021; integral to membrane | GO:001…
GRMZM2G004414_T02	transport.calcium	sodium/potassium/calcium exchanger 6 precursor, putative, expressed	AT1G08960.1	CAX11; calcium:sodium antiporter/ cation:cation antiporter	7.01437077	3.13909598	3.274573911	6.509441974	GO:0055085; transmembrane transport | GO:0016021; integral to membrane
GRMZM2G004414_T03	transport.calcium	sodium/potassium/calcium exchanger 6 precursor, putative, expressed	AT1G08960.1	CAX11; calcium:sodium antiporter/ cation:cation antiporter	7.01437077	3.13909598	3.274573911	6.509441974	Uniprot/SPTREMBL:B8A3Q5; Putative uncharacterized protein | GO:0055085; transmembrane transport | GO:0016021; integral to membrane | GO:0016020; membrane | GO:0006816; calcium ion transport | GO:0006355; regulation of transcription DNA-dependent | GO:0005634; nucleus | GO:0005432; calcium:sodium antiporter activity | GO:0004879; ligand-dependent nuclear receptor activity | GO:0003677; DNA binding
GRMZM2G092125_T01	transport.Major Intrinsic Proteins.PIP	aquaporin PIP2.1, putative, expressed	AT2G37170.1	PIP2B (PLASMA MEMBRANE INTRINSIC PROTEIN 2); water channel	365.472189	72.1491053	103.3768792	246.2428978	EntrezGene:542644; plasma membrane intrinsic protein2 | Uniprot/SWISSPROT:Q9ATM8; Aquaporin PIP2-2 (Plasma membrane intrinsic protein 2-2)(ZmPIP2-2)(ZmPIP2;2) | Uniprot/SPTREMBL:B6TS83; Aquaporin PIP2.1Putative uncharacterized protein ; | Uniprot/SPTREMBL:B4FCN0; Putative uncharacterized protein | UniGene:Zm.605; Plasma membrane intrinsic protein2 | RefSeq_peptide:NP_001105638; aquaporin PIP2-2 |…
GRMZM2G042146_T03	transport.metabolite transporters at the mitochondrial membrane	mitochondrial 2-oxoglutarate/malate carrier protein, putative, expressed	AT5G19760.1	dicarboxylate/tricarboxylate carrier (DTC)	195.2559625	73.48485108	80.42165846	84.33996874	GO:0005488; binding | GO:0005743; mitochondrial inner membrane | GO:0006810; transport | GO:0016020; membrane | GO:0055085; transmembrane transport
GRMZM2G042146_T01	transport.metabolite transporters at the mitochondrial membrane	mitochondrial 2-oxoglutarate/malate carrier protein, putative, expressed	AT5G19760.1	dicarboxylate/tricarboxylate carrier (DTC)	195.2559625	73.48485108	80.42165846	84.33996874	Uniprot/SPTREMBL:B6T8M6; Mitochondrial 2-oxoglutarate/malate carrier protein | Uniprot/SPTREMBL:B4FRG8; Putative uncharacterized protein | UniGene:Zm.157062; Clone 295666 mitochondrial 2-oxoglutarate/malate carrier protein mRNA complete cds; nuclear gene for mitochondrial product | GO:0055085; transmembrane transport | GO:0016020; membrane | GO:0006810; transport | GO:0005743; mitochondrial inner…
GRMZM2G042146_T02	transport.metabolite transporters at the mitochondrial membrane	mitochondrial 2-oxoglutarate/malate carrier protein, putative, expressed	AT5G19760.1	dicarboxylate/tricarboxylate carrier (DTC)	195.2559625	73.48485108	80.42165846	84.33996874	GO:0055085; transmembrane transport | GO:0016020; membrane | GO:0006810; transport | GO:0005743; mitochondrial inner membrane | GO:0005488; binding | GO:0005215; transporter activity
GRMZM2G130049_T01	transport.metal	ATCHX15, putative, expressed	AT2G13620.1	ATCHX15; monovalent cation:proton antiporter/ sodium:hydrogen antiporter	1.679587663	0.178309673	0.316208855	0.427607836	GO:0055085; transmembrane transport | GO:0017153; sodium:dicarboxylate symporter activity | GO:0016021; integral to membrane | GO:0016020; membrane | GO:0015299; solute:hydrogen antiporter activity | GO:0006835; dicarboxylic acid transport | GO:0006812; cation transport
GRMZM2G012923_T01	transport.sugars	sugar transporter type 2a, putative, expressed	AT4G35300.1	TMT2 (TONOPLAST MONOSACCHARIDE TRANSPORTER2); carbohydrate transmembrane transporter/ nucleoside transmembrane transporter/ sugar:hydrogen symporter	42.72643962	5.80296062	19.5172132	19.54424321	UniGene:Zm.12169; TSA: Zea mays contig25619 mRNA sequence | GO:0055085; transmembrane transport | GO:0022891; substrate-specific transmembrane transporter activity | GO:0016021; integral to membrane | GO:0016020; membrane | GO:0006810; transport | GO:0005215; transporter activity
GRMZM2G071119_T01	transport.unspecified anions	chloride channel-like protein CLC-g, putative, expressed	AT5G33280.1	chloride channel-like (CLC) protein, putative	4.247318818	1.377078648	1.99422218	2.199788566	Uniprot/SPTREMBL:B4G089; Putative uncharacterized protein | GO:0055085; transmembrane transport | GO:0016020; membrane | GO:0006821; chloride transport | GO:0005247; voltage-gated chloride channel activity | GO:0005216; ion channel activity
GRMZM2G071119_T02	transport.unspecified anions	chloride channel-like protein CLC-g, putative, expressed	AT5G33280.1	chloride channel-like (CLC) protein, putative	4.247318818	1.377078648	1.99422218	2.199788566	Uniprot/SPTREMBL:B4F913; Putative uncharacterized protein | GO:0055085; transmembrane transport | GO:0016020; membrane | GO:0006821; chloride transport | GO:0005247; voltage-gated chloride channel activity | GO:0005216; ion channel activity
GRMZM2G071119_T03	transport.unspecified anions	chloride channel-like protein CLC-g, putative, expressed	AT5G33280.1	chloride channel-like (CLC) protein, putative	4.247318818	1.377078648	1.99422218	2.199788566	Uniprot/SPTREMBL:D5LGX3; Chloride channel G | UniGene:Zm.29156; Chloride channel G | RefSeq_peptide:NP_001130407; chloride channel G | RefSeq_dna:NM_001136935; chloride channel G (LOC100191503) mRNA | GO:0055085; transmembrane transport | GO:0016020; membrane | GO:0006821; chloride transport | GO:0005247; voltage-gated chloride channel activity | GO:0005216; ion channel activity | EntrezGene:1001…
GRMZM2G071119_T04	transport.unspecified anions	chloride channel-like protein CLC-g, putative, expressed	AT5G33280.1	chloride channel-like (CLC) protein, putative	4.247318818	1.377078648	1.99422218	2.199788566	Uniprot/SPTREMBL:B4G089; Putative uncharacterized protein | GO:0055085; transmembrane transport | GO:0016020; membrane | GO:0006821; chloride transport | GO:0005247; voltage-gated chloride channel activity | GO:0005216; ion channel activity
GRMZM2G027851_T01	transport.unspecified cations	sodium/hydrogen exchanger 2, putative, expressed	AT3G05030.2	NHX2 (SODIUM HYDROGEN EXCHANGER 2); sodium ion transmembrane transporter/ sodium:hydrogen antiporter	12.63045334	5.644987061	8.032967551	8.990668555	Uniprot/SPTREMBL:Q9ATZ9; Sodium/hydrogen exchanger Fragment | UniGene:Zm.82157; Na+/H+ antiporter | GO:0055085; transmembrane transport | GO:0016021; integral to membrane | GO:0015385; sodium:hydrogen antiporter activity | GO:0015299; solute:hydrogen antiporter activity | GO:0006885; regulation of pH | GO:0006814; sodium ion transport | GO:0006812; cation transport
GRMZM2G027851_T03	transport.unspecified cations	sodium/hydrogen exchanger 2, putative, expressed	AT3G05030.2	NHX2 (SODIUM HYDROGEN EXCHANGER 2); sodium ion transmembrane transporter/ sodium:hydrogen antiporter	12.63045334	5.644987061	8.032967551	8.990668555	GO:0055085; transmembrane transport | GO:0016021; integral to membrane | GO:0015385; sodium:hydrogen antiporter activity | GO:0015299; solute:hydrogen antiporter activity | GO:0008076; voltage-gated potassium channel complex | GO:0006885; regulation of pH | GO:0006814; sodium ion transport | GO:0006813; potassium ion transport | GO:0006812; cation transport | GO:0005249; voltage-gated potassium c…
GRMZM2G121070_T01	transport.unspecified cations	organic cation transporter protein, putative, expressed	AT3G20660.1	AtOCT4 (Arabidopsis thaliana ORGANIC CATION/CARNITINE TRANSPORTER4); carbohydrate transmembrane transporter/ sugar:hydrogen symporter	11.71635584	0.795884116	2.381731183	3.324188396	Uniprot/SPTREMBL:C0P495; Putative uncharacterized protein | UniGene:Zm.76081; Hypothetical protein LOC100382090 | UniGene:Zm.149362; TSA: Zea mays contig17392 mRNA sequence | RefSeq_peptide:NP_001168323; hypothetical protein LOC100382090 | RefSeq_dna:NM_001174852; hypothetical protein LOC100382090 (LOC100382090) mRNA | GO:0055085; transmembrane transport | GO:0022891; substrate-specific transmemb…
GRMZM2G011592_T01	transport.metal	vacuolar cation/proton exchanger 1a, putative, expressed	AT3G51860.1	CAX3 (CATION EXCHANGER 3); calcium:cation antiporter/ calcium:hydrogen antiporter/ cation:cation antiporter	135.234058	45.77438493	220.4729051	426.5853311	RefSeq_peptide:NP_001131004; hypothetical protein LOC100192109 | UniGene:Zm.119917; Transcribed locus moderately similar to NP_001131004.1 hypothetical protein LOC100192109 [Zea mays] | UniGene:Zm.84261; Hypothetical protein LOC100192109 | Uniprot/SPTREMBL:B4FBD4; Putative uncharacterized protein | RefSeq_dna:NM_001137532; hypothetical protein LOC100192109 (LOC100192109) mRNA | GO:0055085; transm…
GRMZM2G011592_T02	transport.metal	vacuolar cation/proton exchanger 1a, putative, expressed	AT3G51860.1	CAX3 (CATION EXCHANGER 3); calcium:cation antiporter/ calcium:hydrogen antiporter/ cation:cation antiporter	135.234058	45.77438493	220.4729051	426.5853311	GO:0055085; transmembrane transport | GO:0016021; integral to membrane | GO:0008324; cation transmembrane transporter activity | GO:0006812; cation transport
GRMZM2G011592_T03	transport.metal	vacuolar cation/proton exchanger 1a, putative, expressed	AT3G51860.1	CAX3 (CATION EXCHANGER 3); calcium:cation antiporter/ calcium:hydrogen antiporter/ cation:cation antiporter	135.234058	45.77438493	220.4729051	426.5853311	GO:0055085; transmembrane transport | GO:0016021; integral to membrane | GO:0008324; cation transmembrane transporter activity | GO:0006812; cation transport
GRMZM2G011592_T04	transport.metal	vacuolar cation/proton exchanger 1a, putative, expressed	AT3G51860.1	CAX3 (CATION EXCHANGER 3); calcium:cation antiporter/ calcium:hydrogen antiporter/ cation:cation antiporter	135.234058	45.77438493	220.4729051	426.5853311	Uniprot/SPTREMBL:B4FBD4; Putative uncharacterized protein | RefSeq_peptide:NP_001131004; hypothetical protein LOC100192109 | GO:0055085; transmembrane transport | GO:0016021; integral to membrane | GO:0008324; cation transmembrane transporter activity | GO:0006812; cation transport | EntrezGene:100192109; hypothetical protein LOC100192109
GRMZM2G011592_T05	transport.metal	vacuolar cation/proton exchanger 1a, putative, expressed	AT3G51860.1	CAX3 (CATION EXCHANGER 3); calcium:cation antiporter/ calcium:hydrogen antiporter/ cation:cation antiporter	135.234058	45.77438493	220.4729051	426.5853311	Uniprot/SPTREMBL:B4FBD4; Putative uncharacterized protein | RefSeq_peptide:NP_001131004; hypothetical protein LOC100192109 | GO:0055085; transmembrane transport | GO:0016021; integral to membrane | GO:0008324; cation transmembrane transporter activity | GO:0006812; cation transport | EntrezGene:100192109; hypothetical protein LOC100192109
GRMZM2G011592_T06	transport.metal	vacuolar cation/proton exchanger 1a, putative, expressed	AT3G51860.1	CAX3 (CATION EXCHANGER 3); calcium:cation antiporter/ calcium:hydrogen antiporter/ cation:cation antiporter	135.234058	45.77438493	220.4729051	426.5853311	Uniprot/SPTREMBL:B4FBD4; Putative uncharacterized protein | RefSeq_peptide:NP_001131004; hypothetical protein LOC100192109 | GO:0055085; transmembrane transport | GO:0016021; integral to membrane | GO:0008324; cation transmembrane transporter activity | GO:0006812; cation transport | EntrezGene:100192109; hypothetical protein LOC100192109
GRMZM2G028736_T01	transport.ammonium	ammonium transporter 1, member 2, putative, expressed	AT1G64780.1	ATAMT1;2 (AMMONIUM TRANSPORTER 1;2); ammonium transmembrane transporter	0.038372163	0.02070795	10.62208056	28.25164789	Uniprot/SPTREMBL:B4F978; Putative uncharacterized protein | UniGene:Zm.40644; Hypothetical protein LOC100191554 | RefSeq_peptide:NP_001130456; hypothetical protein LOC100191554 | RefSeq_dna:NM_001136984; hypothetical protein LOC100191554 (LOC100191554) mRNA | GO:0055085; transmembrane transport | GO:0016020; membrane | GO:0008519; ammonium transmembrane transporter activity | GO:0006810; transpor…
GRMZM2G045473_T01	transport.phosphate	inorganic phosphate transporter 1-5, putative, expressed	AT2G32830.1	PHT5; inorganic phosphate transmembrane transporter/ phosphate transmembrane transporter	0	0.218596217	7.730422269	10.88280236	Uniprot/SPTREMBL:B4FHN4; Putative uncharacterized protein | UniGene:Zm.120010; Hypothetical protein LOC100194162 | RefSeq_peptide:NP_001132684; hypothetical protein LOC100194162 | RefSeq_dna:NM_001139212; hypothetical protein LOC100194162 (LOC100194162) mRNA | GO:0055085; transmembrane transport | GO:0016021; integral to membrane | GO:0006817; phosphate transport | GO:0006810; transport | GO:0005…
GRMZM2G047187_T01	not assigned	tetracycline transporter protein, putative, expressed	AT2G16990.2	tetracycline transporter	7.968920608	2.809252641	16.597384	19.52057659	RefSeq_dna:NM_001137026; hypothetical protein LOC100191596 (LOC100191596) mRNA | RefSeq_dna:NM_001157805; tetracycline transporter protein (LOC100284910) mRNA | RefSeq_peptide:NP_001130498; hypothetical protein LOC100191596 | RefSeq_peptide:NP_001151277; tetracycline transporter protein | UniGene:Zm.102809; Hypothetical protein LOC100191596 | Uniprot/SPTREMBL:B4F9E5; Putative uncharacterized prot…
GRMZM2G047187_T02	not assigned	tetracycline transporter protein, putative, expressed	AT2G16990.2	tetracycline transporter	7.968920608	2.809252641	16.597384	19.52057659	GO:0005215; transporter activity | GO:0006810; transport | GO:0016020; membrane | GO:0055085; transmembrane transport
GRMZM2G047187_T03	not assigned	tetracycline transporter protein, putative, expressed	AT2G16990.2	tetracycline transporter	7.968920608	2.809252641	16.597384	19.52057659	GO:0055085; transmembrane transport | GO:0016020; membrane | GO:0006810; transport | GO:0005215; transporter activity
GRMZM2G047187_T04	not assigned	tetracycline transporter protein, putative, expressed	AT2G16990.2	tetracycline transporter	7.968920608	2.809252641	16.597384	19.52057659	GO:0005215; transporter activity | GO:0006810; transport | GO:0016020; membrane | GO:0055085; transmembrane transport
GRMZM2G047368_T01	transport.Major Intrinsic Proteins.PIP	aquaporin PIP2.4, putative, expressed	AT2G37170.1	PIP2B (PLASMA MEMBRANE INTRINSIC PROTEIN 2); water channel	28.20329973	18.13527634	53.17566929	199.4343235	UniGene:Zm.103363; Plasma membrane integral protein ZmPIP2-6 | RefSeq_dna:NM_001111557; plasma membrane integral protein ZmPIP2-6 (PIP2-6) mRNA | MaizeGDB_GenBank:AF326495; product:plasma membrane integral protein ZmPIP2-6 | GO:0055085; transmembrane transport | GO:0016021; integral to membrane | GO:0016020; membrane | GO:0006810; transport | GO:0005215; transporter activity | GenBank:AF326495; p…
GRMZM2G047368_T02	transport.Major Intrinsic Proteins.PIP	aquaporin PIP2.4, putative, expressed	AT2G37170.1	PIP2B (PLASMA MEMBRANE INTRINSIC PROTEIN 2); water channel	28.20329973	18.13527634	53.17566929	199.4343235	Uniprot/SWISSPROT:Q9ATM5; Aquaporin PIP2-6 (Plasma membrane intrinsic protein 2-6)(ZmPIP2-6)(ZmPIP2;6) | Uniprot/SPTREMBL:B4FS42; Aquaporin PIP2.4Putative uncharacterized protein ; | RefSeq_peptide:NP_001105027; aquaporin PIP2-6 | GO:0055085; transmembrane transport | GO:0016021; integral to membrane | GO:0016020; membrane | GO:0006810; transport | GO:0005215; transporter activity | EntrezGene:54…
GRMZM2G093323_T01	transport.metabolite transporters at the envelope membrane	protein brittle-1, chloroplast precursor, putative, expressed	AT4G32400.1	SHS1 (SODIUM HYPERSENSITIVE 1); binding / nucleotide transmembrane transporter/ transporter	5.347562514	4.979539508	7.445768678	13.61334295	RefSeq_dna:NM_001130130; nucleotide sugar translocator BT2A (BT2A) mRNA | RefSeq_peptide:NP_001123602; nucleotide sugar translocator BT2A | UniGene:Zm.117511; Nucleotide sugar translocator BT2A | Uniprot/SPTREMBL:B2LWG5; Nucleotide sugar translocator BT2A | Uniprot/SPTREMBL:B4FQD1; Putative uncharacterized protein | Uniprot/SPTREMBL:B6TVG6; Protein brittle-1 | GO:0055085; transmembrane transport …
GRMZM2G104942_T01	transport.membrane system unknown	glycerol 3-phosphate permease, putative, expressed	AT3G47420.1	glycerol-3-phosphate transporter, putative / glycerol 3-phosphate permease, putative	3.189524491	1.780275781	17.98899443	30.12106741	Uniprot/SPTREMBL:B4FK78; Putative uncharacterized protein | UniGene:Zm.74114; Hypothetical protein LOC100216884 | RefSeq_peptide:NP_001136743; hypothetical protein LOC100216884 | RefSeq_dna:NM_001143271; hypothetical protein LOC100216884 (LOC100216884) mRNA | GO:0055085; transmembrane transport | EntrezGene:100216884; hypothetical protein LOC100216884
GRMZM2G104942_T03	transport.membrane system unknown	glycerol 3-phosphate permease, putative, expressed	AT3G47420.1	glycerol-3-phosphate transporter, putative / glycerol 3-phosphate permease, putative	3.189524491	1.780275781	17.98899443	30.12106741	Uniprot/SPTREMBL:B4FK78; Putative uncharacterized protein | UniGene:Zm.155551; Clone 1410393 mRNA sequence | RefSeq_peptide:NP_001136743; hypothetical protein LOC100216884 | GO:0055085; transmembrane transport | EntrezGene:100216884; hypothetical protein LOC100216884
GRMZM2G106703_T02	transport.metabolite transporters at the mitochondrial membrane	mitochondrial carrier protein CGI-69, putative, expressed	AT4G27940.1	mitochondrial substrate carrier family protein	6.346821904	4.673542605	7.549950692	12.85048609	GO:0055085; transmembrane transport | GO:0016020; membrane | GO:0006810; transport | GO:0005743; mitochondrial inner membrane | GO:0005488; binding | GO:0005215; transporter activity
GRMZM2G106703_T01	transport.metabolite transporters at the mitochondrial membrane	mitochondrial carrier protein CGI-69, putative, expressed	AT4G27940.1	mitochondrial substrate carrier family protein	6.346821904	4.673542605	7.549950692	12.85048609	Uniprot/SPTREMBL:C4JC45; Putative uncharacterized protein | UniGene:Zm.118426; Full-length cDNA clone ZM_BFc0172H17 | GO:0055085; transmembrane transport | GO:0016020; membrane | GO:0006810; transport | GO:0005743; mitochondrial inner membrane | GO:0005488; binding | GO:0005215; transporter activity
GRMZM2G118497_T01	transport.metal	metal tolerance protein C3, putative, expressed	AT3G58060.1	cation efflux family protein / metal tolerance protein, putative (MTPc3)	1.807690721	1.522793667	9.557150355	13.83134631	Uniprot/SPTREMBL:C0HGV8; Putative uncharacterized protein | UniGene:Zm.85208; Hypothetical protein LOC100381541 | RefSeq_peptide:NP_001167840; hypothetical protein LOC100381541 | RefSeq_dna:NM_001174369; hypothetical protein LOC100381541 (LOC100381541) mRNA | GO:0055085; transmembrane transport | GO:0016020; membrane | GO:0008324; cation transmembrane transporter activity | GO:0006812; cation tra…
GRMZM2G118497_T02	transport.metal	metal tolerance protein C3, putative, expressed	AT3G58060.1	cation efflux family protein / metal tolerance protein, putative (MTPc3)	1.807690721	1.522793667	9.557150355	13.83134631	GO:0055085; transmembrane transport | GO:0016020; membrane | GO:0008324; cation transmembrane transporter activity | GO:0006812; cation transport
GRMZM2G143204_T01	RNA.regulation of transcription.WRKY domain transcription factor family	OsWRKY3 - Superfamily of rice TFs having WRKY and zinc finger domains, expressed	AT1G69310.2	WRKY57; transcription factor	0.43902618	0.1263601	0.924342751	6.681735937	RefSeq_dna:NM_001136605; hypothetical protein LOC100191170 (LOC100191170) mRNA | RefSeq_dna:NM_001151725; hypothetical protein LOC100278451 (LOC100278451) mRNA | RefSeq_peptide:NP_001130077; hypothetical protein LOC100191170 | RefSeq_peptide:NP_001145197; hypothetical protein LOC100278451 | UniGene:Zm.31459; Hypothetical protein LOC100191170 | Uniprot/SPTREMBL:B4F7V7; Putative uncharacterized pro…
GRMZM2G143204_T02	RNA.regulation of transcription.WRKY domain transcription factor family	OsWRKY3 - Superfamily of rice TFs having WRKY and zinc finger domains, expressed	AT1G69310.2	WRKY57; transcription factor	0.43902618	0.1263601	0.924342751	6.681735937	Uniprot/SPTREMBL:C0PK84; Putative uncharacterized protein | Uniprot/SPTREMBL:B6U8Q4; Putative uncharacterized protein | RefSeq_peptide:NP_001145197; hypothetical protein LOC100278451 | RefSeq_dna:NM_001151725; hypothetical protein LOC100278451 (LOC100278451) mRNA | GO:0055085; transmembrane transport | GO:0045449; regulation of transcription | GO:0043565; sequence-specific DNA binding | GO:001602…
GRMZM2G143204_T03	RNA.regulation of transcription.WRKY domain transcription factor family	OsWRKY3 - Superfamily of rice TFs having WRKY and zinc finger domains, expressed	AT1G69310.2	WRKY57; transcription factor	0.43902618	0.1263601	0.924342751	6.681735937	GO:0055085; transmembrane transport | RefSeq_dna:NM_001151725; hypothetical protein LOC100278451 (LOC100278451) mRNA | RefSeq_peptide:NP_001130077; hypothetical protein LOC100191170 | RefSeq_peptide:NP_001145197; hypothetical protein LOC100278451 | Uniprot/SPTREMBL:B4F7V7; Putative uncharacterized protein | Uniprot/SPTREMBL:B6U8Q4; Putative uncharacterized protein | GO:0045449; regulation of tran…
GRMZM2G146240_T01	not assigned	expressed protein	AT5G20380.1	PHT4;5; inorganic phosphate transmembrane transporter	18.15762264	6.405238085	27.01637357	53.48733723	Uniprot/SPTREMBL:C0P6W0; Putative uncharacterized protein | UniGene:Zm.46292; TSA: Zea mays contig22648 mRNA sequence | UniGene:Zm.150084; TSA: Zea mays contig13980 mRNA sequence | UniGene:Zm.145451; TSA: Zea mays contig47179 mRNA sequence | RefSeq_peptide:NP_001168575; hypothetical protein LOC100382358 | RefSeq_dna:NM_001175104; hypothetical protein LOC100382358 (LOC100382358) mRNA | GO:0055085;…
GRMZM2G153920_T01	transport.sugars	sorbitol transporter, putative, expressed	AT3G18830.1	ATPLT5 (POLYOL TRANSPORTER 5); D-ribose transmembrane transporter/ D-xylose transmembrane transporter/ carbohydrate transmembrane transporter/ galactose transmembrane transporter/ glucose transmembrane transporter/ glycerol transmembrane transporter/ mann	0	0.278385279	23.20962373	29.44661979	RefSeq_dna:NM_001153974; sorbitol transporter (LOC100281055) mRNA | RefSeq_peptide:NP_001147446; sorbitol transporter | UniGene:Zm.120456; Transcribed locus moderately similar to NP_001147446.1 sorbitol transporter [Zea mays] | UniGene:Zm.40112; Sorbitol transporter | Uniprot/SPTREMBL:B4FQN6; Putative uncharacterized proteinSorbitol transporter ; | GO:0055085; transmembrane transport | GO:0022891…
GRMZM2G178356_T01	transport.potassium	potassium channel KAT1, putative, expressed	AT4G18290.1	KAT2 (POTASSIUM CHANNEL IN ARABIDOPSIS THALIANA 2); cyclic nucleotide binding / inward rectifier potassium channel	1.363129901	1.003128651	6.085379596	8.215199121	GO:0055085; transmembrane transport | GO:0016020; membrane | GO:0006813; potassium ion transport | GO:0006811; ion transport | GO:0005249; voltage-gated potassium channel activity | GO:0005216; ion channel activity
GRMZM2G178693_T01	transport.Major Intrinsic Proteins.PIP	aquaporin PIP2.3, putative, expressed	AT2G37170.1	PIP2B (PLASMA MEMBRANE INTRINSIC PROTEIN 2); water channel	34.77606852	26.43263383	61.3509629	248.5510432	Uniprot/SWISSPROT:Q9XF58; Aquaporin PIP2-5 (Plasma membrane intrinsic protein 2-5)(ZmPIP2-5)(ZmPIP2;5)(ZmPIP2a) | UniGene:Zm.600; Plasma membrane intrinsic protein | RefSeq_peptide:NP_001105616; aquaporin PIP2-5 | RefSeq_dna:NM_001112146; plasma membrane intrinsic protein (pip2-5) mRNA | MaizeGDB_GenBank:AY243802; product:aquaporin | MaizeGDB_GenBank:AF130975; product:plasma membrane intrinsic pr…
GRMZM2G455817_T01	transport.potassium	potassium transporter 16, putative, expressed	AT4G13420.1	HAK5 (HIGH AFFINITY K+ TRANSPORTER 5); potassium ion transmembrane transporter/ potassium:sodium symporter	0	0.527451516	53.57894474	74.0910235	UniGene:Zm.27835; Transcribed locus strongly similar to XP_002464314.1 hypothetical protein SORBIDRAFT_01g016010 [Sorghum bicolor] | GO:0016020; membrane | GO:0015079; potassium ion transmembrane transporter activity | GO:0006813; potassium ion transport
GRMZM2G041645_T01	not assigned	expressed protein	AT4G28100.1	unknown protein	17.31578784	0.135266355	0	0	UniGene:Zm.1137; Clone 291872 mRNA sequence | GO:0055085; transmembrane transport | GO:0016020; membrane | GO:0006821; chloride transport | GO:0005247; voltage-gated chloride channel activity
GRMZM2G051630_T01	transport.metabolite transporters at the mitochondrial membrane	mitochondrial 2-oxoglutarate/malate carrier protein, putative, expressed	AT5G19760.1	dicarboxylate/tricarboxylate carrier (DTC)	217.8151376	90.58090895	103.0127294	95.50595747	RefSeq_dna:NM_001148681; hypothetical protein LOC100274318 (LOC100274318) mRNA | RefSeq_peptide:NP_001142153; hypothetical protein LOC100274318 | UniGene:Zm.12735; Hypothetical protein LOC100274318 | Uniprot/SPTREMBL:B4FBF6; Putative uncharacterized protein | GO:0055085; transmembrane transport | GO:0016020; membrane | GO:0006810; transport | GO:0005743; mitochondrial inner membrane | GO:0005488;…
GRMZM2G051630_T02	transport.metabolite transporters at the mitochondrial membrane	mitochondrial 2-oxoglutarate/malate carrier protein, putative, expressed	AT5G19760.1	dicarboxylate/tricarboxylate carrier (DTC)	217.8151376	90.58090895	103.0127294	95.50595747	GO:0055085; transmembrane transport | GO:0016020; membrane | GO:0006810; transport | GO:0005488; binding
GRMZM2G169914_T01	transport.metabolite transporters at the mitochondrial membrane	mitochondrial carrier protein PET8, putative, expressed	AT4G39460.1	SAMC1 (S-ADENOSYLMETHIONINE CARRIER 1); S-adenosylmethionine transmembrane transporter/ binding	5.657028306	0.310461968	0	0	Uniprot/SPTREMBL:C0HG97; Putative uncharacterized protein | RefSeq_peptide:NP_001167783; hypothetical protein LOC100381476 | GO:0055085; transmembrane transport | GO:0016020; membrane | GO:0006810; transport | GO:0005743; mitochondrial inner membrane | GO:0005488; binding | EntrezGene:100381476; hypothetical protein LOC100381476
GRMZM2G169914_T03	transport.metabolite transporters at the mitochondrial membrane	mitochondrial carrier protein PET8, putative, expressed	AT4G39460.1	SAMC1 (S-ADENOSYLMETHIONINE CARRIER 1); S-adenosylmethionine transmembrane transporter/ binding	5.657028306	0.310461968	0	0	GO:0055085; transmembrane transport | GO:0016020; membrane | GO:0006810; transport | GO:0005743; mitochondrial inner membrane | GO:0005488; binding | GO:0005215; transporter activity
[truncated: 93 more rows]
