# Supplementary material for: Correlation of Aquaporins and Transmembrane Solute Transporters Revealed by Genome-Wide Analysis in Developing Maize Leaf
Source: Comp Funct Genomics. 2012 Sep 26;2012:546930. doi: 10.1155/2012/546930 (PMC3463914; doi:10.1155/2012/546930)
Supplement: Supplementary file 1 — Supplemental file1: 812 maize transmembrane transport genes and expression along the leaf developmental gradient. Supplemental file2: 33 identified aquaporins in maize from the MaizeGDB and Affymetrix GeneChip Maize Genome Array. Supplemental file3: Simiar pattern of maize aquaporins and transmembrane solutes(ions) transporters in developing maize leaf. [file 546930.f1.zip › Supplementary_2-_maize_aquaporins_33_gene_CFG_376809.xls]

## Sheet: Sheet1
Supplementary 2. maize_aquaporins_33_gene
Maize MIPs	Accession No.	Family	uid	chr	NCBI-GeneID-kegg	UniGene--GO
ZmNIP1;1	AAK26750	ZmNIP1-1	5	GRMZM2G041980	zma:542741	Zm.67014
ZmNIP2;1	AAK26751	ZmNIP2-1	5	GRMZM2G028325	zma:542643	Zm.84816
ZmNIP2;2	AAK26752	ZmNIP2-2	6	GRMZM2G137108	zma:541884	Zm.23582
ZmNIP2;3	AAK26849	ZmNIP2-3	9	GRMZM2G081239	zma:542497	Zm.623
ZmNIP3;1	AAK26753	ZmNIP3-1	1	GRMZM2G176209	zma:541885	Zm.602
		ZmNIP5-1	4	GRMZM2G000471	zma:100284417	Zm.134162
ZmPIP1;1	Q41870	ZmPIP1-1	2	GRMZM2G174807	zma:542434	Zm.181
ZmPIP1;2	AAD29676	ZmPIP1-2	5	AC209208.3_FGT002	zma:541779	Zm.137978
ZmPIP1;3	AAK26754	ZmPIP1-3	4	GRMZM2G392975	zma:541886	Zm.103315
ZmPIP1;4	AAK26755	ZmPIP1-4	4	GRMZM2G392975	zma:541886	Zm.103315
ZmPIP1;5	AAK26756	ZmPIP1-5	4	GRMZM2G081843	zma:542014	Zm.94737
ZmPIP1;6	AAK26757	ZmPIP1-6	9	GRMZM2G136032	zma:541887	Zm.604
ZmPIP2;1	AAK26758	ZmPIP2-1	7	GRMZM2G014914	zma:541888	Zm.14436
ZmPIP2;2	AAK26759	ZmPIP2-2	2	GRMZM2G092125	zma:542644	Zm.605
ZmPIP2;3	AAK26760	ZmPIP2-3	4	GRMZM2G081192	zma:541889	Zm.15890
ZmPIP2;4	AAK26761	ZmPIP2-4	5	GRMZM2G154628	zma:541890	Zm.138003
ZmPIP2;5	AAD28761	ZmPIP2-5	2	GRMZM2G178693	zma:542619	Zm.600
ZmPIP2;6	AAK26762	ZmPIP2-6	7	GRMZM2G047368	zma:541891	Zm.103363
ZmPIP2;7	AAK26763				zma:542645	Zm.608
ZmSIP1;1	AAK26764	ZmSIP1-1	4	GRMZM2G113470	zma:542494	Zm.609
ZmSIP1;2	AAK26765	ZmSIP1-2	8	GRMZM2G060922	zma:541892	Zm.97099
ZmSIP2;1	AAK26766	ZmSIP2-1	1	GRMZM2G175038	zma:542646	Zm.611
ZmTIP1;1	AAC09245				zma:541675	Zm.9197
ZmTIP1;2	AAK26767	ZmTIP1-2	8	GRMZM2G168439	zma:541893	Zm.612
ZmTIP2;1	AAK26768	ZmTIP2-1	4	GRMZM2G027098	zma:541894	Zm.613
ZmTIP2;2	AAK26769	ZmTIP2-2	5	GRMZM2G056908	zma:541895	Zm.614
ZmTIP2;3	AAK26770	ZmTIP2-3	2	GRMZM2G125023	zma:541687	Zm.615
ZmTIP3;1	AAK26771	ZmTIP3-1	5	GRMZM2G305446	zma:541896	Zm.616
ZmTIP3;2	AAK26848	ZmTIP3-2	1	GRMZM2G103983	zma:541912	Zm.622
ZmTIP4;1	AAK26772	ZmTIP4-1	6	GRMZM2G103945	zma:541897	Zm.617
ZmTIP4;2	AAK26773	ZmTIP4-2	8	GRMZM2G108273	zma:541898	Zm.618
ZmTIP4;3	AAK26774	ZmTIP4-3	3	GRMZM2G146627	zma:541899	Zm.619
ZmTIP4;4	AAK26775	ZmTIP4-4	3	GRMZM2G093090	zma:542647	Zm.85735
