# Supplementary material for: Correlation of Aquaporins and Transmembrane Solute Transporters Revealed by Genome-Wide Analysis in Developing Maize Leaf
Source: Comp Funct Genomics. 2012 Sep 26;2012:546930. doi: 10.1155/2012/546930 (PMC3463914; doi:10.1155/2012/546930)
Supplement: Supplementary file 1 — Supplemental file1: 812 maize transmembrane transport genes and expression along the leaf developmental gradient. Supplemental file2: 33 identified aquaporins in maize from the MaizeGDB and Affymetrix GeneChip Maize Genome Array. Supplemental file3: Simiar pattern of maize aquaporins and transmembrane solutes(ions) transporters in developing maize leaf. [file 546930.f1.zip › Supplementary_3_simiar_pattern_expr_CFG_376810.xls]

## Sheet: after_important_gene_expr
Supplementary 3. simiar pattern of maize aquaporins and transmembrane solutes(ions) transporters in developing maize leaf
Aquaporins Family	nutrient solutes	kgeneID	EntrezGene	kdescription	GO_short_description	RPKM_base	RPKM_1cm	RPKM_4cm	RPKMtip	References
ZmNIP1:1	ZmNIP1:1	GRMZM2G041980	542741	aquaporin NIP1;2 (NOD26-LIKE INTRINSIC PROTEIN 1;2)	water channel	284.425	55.783	1.3292	0.604141	Kamiya.T et al, 2009,[56]
ZmNIP1:1	Glycerol	GRMZM2G160327	100281197	peroxidase 64 (PER64) (P64) (PRXR4)	heme binding (GO:0020037) intracellular accumulation of glycerol (GO:0006973)	34.6028	6.64024	0.0760913	0.0180699
ZmNIP1:1	Glycerol	GRMZM2G078757		glycerol-3-phosphate transporter	GO:0055085; transmembrane ransport	6.67779	1.6835	0.676395	0.643434
ZmNIP1:1	Phosphate	GRMZM2G102521		solute carrier family 35 member C2, phosphate translocator	GO:0055085; transmembrane transport	7.72431	1.1394	0.15623	0.0887332
ZmNIP1:1	Phosphate	GRMZM2G142919	100281669	PHT4;2 (PHOSPHATE TRANSPORTER 4;2);	inorganic phosphate transmembrane transporte	11.0676	3.75288	1.66808	1.40701	Misson J, et al ,2004,[44]
ZmNIP1:1	Phosphate	GRMZM2G048363	100282593	PHT4;6 (PHOSPHATE TRANSPORTER 4;6);	GO:0055085; transmembrane transport	7.29641	2.15233	0.584365	0.612182	Shin H et al ,2004,[43]
ZmNIP1:1	chloride (Cl−)	GRMZM2G064563		major Facilitator Superfamily protein,	GO:0005247; voltage-gated chloride channel activity	36.3021	8.66304	0.665275	0.455243
ZmNIP1:1	chloride (Cl−)	GRMZM2G128969		chloride channel protein CLC-f	GO:0006821chloride transport | GO:0005247; voltage-gated chloride channel activity	10.9919	2.17553	0.739737	0.315437	Marmagne A. et al. 2007,[45] ,von der Fecht-Bartenbach J .2007. 2010,[46][47]
ZmNIP1:1	chloride (Cl−)	GRMZM2G139193 |	100284694	plastocyanin-like domain-containing protein	GO:0005247; voltage-gated chloride channel activity | GO:0006821; chloride transport	19.5421	2.90426	0.0965687	0.104472
ZmNIP1:1	drug	GRMZM2G069098	100286164	drug transmembrane transport	GO:0015238; drug transmembrane transporter activity | GO:0006855; drug transmembrane transport	8.22625	1.49445	0.506657	0.0948669
ZmNIP1:1	Auxin	GRMZM2G072850		ABCB19; auxin efflux transmembrane transporter	transport.ABC GO:0055085; transmembrane transport	8.55876	1.29286	0.148238	0.0477858	Lewis DR.et al.2009,[31]
ZmNIP1:1	malic acid	GRMZM2G061469	100281575	malic acid transport protein, SLAH3 (SLAC1 HOMOLOGUE 3)	GO:0055085; transmembrane transport	12.6892	2.03367	0.178655	0.115965
ZmNIP1:1	peptide transport	GRMZM2G378604	100281589	peptide transporter PTR2-B	GO:0055085; transmembrane transport GO:0006857; oligopeptide transport	16.9847	3.45614	0.817052	0.210355
ZmNIP1:1	potassium	GRMZM2G125387		potassium transporter 8, KT2	GO:0015079; potassium ion transmembrane transporter activity | GO:0006813; potassium ion transport	4.85119	0.915091	0.214134	0.124652
ZmNIP1:1	copper	GRMZM2G139193	100284694	plastocyanin-like domain-containing protein	GO:0005507; copper ion binding |	19.5421	2.90426	0.0965687	0.104472
ZmNIP1:1	zinc ion	AC209819.3_FG01	542503	ROP9 (RHO-RELATED PROTEIN FROM PLANTS 9)	GO:0006877) zinc ion transporter and divalent metal ion transporter involved in manganese homeostasis,	37.5258	7.68491	0.641276	0.491853
ZmNIP1:1	cobalt ion homeostasis	AC209819.3_FG012
ZmNIP1:1	manganese	AC209819.3_FG012
		GRMZM2G028325	542643	ZmNIP2;1	water channe	0.738541	3.7365	108.719	151.121
ZmNIP2;1
ZmNIP2;1	phosphate	GRMZM2G045473	100194162	PHT5; inorganic phosphate transmembrane transporter	GO:0006817; phosphate transport GO:0005315; inorganic phosphate transmembrane transporter activity	0	0.218596	7.73042	10.8828	Okumura S et al. 1998,[57]
ZmNIP2;1	drug	GRMZM2G043075		drug transmembrane transport	GO:0015238; drug transmembrane transporter activity | GO:0006855; drug transmembrane transport	1.0258	3.32152	32.0485	52.2681
ZmNIP2;1	drug	GRMZM2G115105		drug transmembrane transport	GO:0015238; drug transmembrane transporter activity | GO:0006855; drug transmembrane transport	0.370482	0.908793	8.36433	12.1872
ZmNIP2;1	sugar	GRMZM2G153920	100281055	ATPLT5 (POLYOL TRANSPORTER 5); sorbitol transporter,	transport.sugars GO:0055085; transmembrane transport | GO:0022891; substrate-specific transmembrane transporter activity	0	0.278385	23.2096	29.4466
ZmNIP2;1	sugar	GRMZM2G004694		ATPLT5 (POLYOL TRANSPORTER 5); D-ribose transmembrane transporter proton myo-inositol cotransporter	GO:0022891; substrate-specific transmembrane transporter activity	0.0428431	2.09628	5.158	10.1578
ZmNIP2;1	sulfate	GRMZM2G159632	541917	SULTR1;3; sulfate transmembrane transporter sulfate transporter 1:3,	GO:0055085; transmembrane transport	0.491861	3.70052	6.70084	13.2665	Yoshimoto N, 2003,[30]
ZmNIP2;1	peptide transport	GRMZM2G479703	100383021	OPT7 (OLIGOPEPTIDE TRANSPORTER 7	transport.peptides and oligopeptides	0.7956	3.36081	8.19165	14.6458	Cagnac O, et al. 2004,[50]
ZmNIP2;1	potassium	GRMZM2G088601		PDS3 (PHYTOENE DESATURASE 3);	potassium ion transport GO:0006813; potassium ion transport	0.378944	4.86258	44.103	56.4308	Quadrana L,et al.2011,[58]
ZmNIP2;1	potassium	GRMZM2G134708	100382120	monodehydroascorbate reductase, potassium ion transport	GO:0008324; cation transmembrane transporter activity | GO:0006813; potassium ion transport	0.265645	3.11292	12.2392	17.9163
ZmNIP2;2		GRMZM2G137108		ZmNIP2;2		12.8396	65.196	110.83	191.07
ZmNIP2;2	chloride (Cl−)	GRMZM2G397836		chloride channel protein CLC-d,	voltage-gated chloride channel GO:0006821; chloride transport | GO:0005247; voltage-gated chloride channel activity	7.34127	8.83961	10.9853	15.0256	von der Fecht-Bartenbach J, 2007,[47]
ZmNIP2;2	chloride (Cl−)	GRMZM2G158013	100382058	SULTR3;1 (SULFATE TRANSPORTER 3;1) ;sulfate transporter 3.5, sulfate transmembrane transporter	GO:0008271; secondary active sulfate transmembrane transporter activity | GO:0008272; sulfate transport	2.81764	5.48376	9.25858	16.3628
ZmNIP2;2	Auxin	GRMZM2G154332	100284645	SAUR12 - auxin-responsive SAUR family member		2.04849	14.3971	23.7761	40.1364	Rock CD, Sun X .2005,[59]
ZmNIP2;2	calcium ion	GRMZM2G104730		ACA4 (AUTO-INHIBITED CA(2+)-ATPASE, ISOFORM 4); calcium-transporting ATPase 4, plasma membrane-type,	transmembrane transporter activity2011-11-12GO:0016820; hydrolase activity acting on acid anhydrides catalyzing transmembrane movement of substances GO:0015085; calcium ion transmembrane transporter	2.34607	13.0134	22.1415	33.2005
ZmNIP2;2	calcium ion	GRMZM2G352695		ACA2 (CALCIUM ATPASE 2) calcium-transporting ATPase 2,	GO:0016820; hydrolase activity acting on acid anhydrides catalyzing transmembrane movement of substances GO:0015085; calcium ion transmembrane transporter activity	0.638223	2.59021	4.94531	7.80541	Anil VS,et al.2008,[60]
ZmNIP2;3		GRMZM2G081239		ZmNIP2;3		1.39061	38.113	19.331	28.5273
ZmNIP2;3	phosphate	GRMZM2G162699	100384043	DEG15; endopeptidase	alpha-trehalose-phosphate synthase (UDP-forming) activity (GO:0003825)	2.04446	6.85465	4.53762	5.30303
ZmNIP2;3	cadmium	GRMZM2G344634	100281027	ACBP6 (acyl-CoA-binding protein 6);	GO:0000062; acyl-CoA binding / phosphatidylcholine binding	1.55289	67.1359	26.7093	45.8548	Gao W, et al .2010,[61]
ZmNIP3;1		GRMZM2G176209	541885	ZmNIP3;1	GO:0016020; membrane | GO:0006810; transport | GO:0005215; transporter activity |	10.8931	0.6225	0.3794	0.028008
ZmNIP3;1	phosphate	GRMZM2G003379		ATGH9A1 (ARABIDOPSIS THALIANA GLYCOSYL HYDROLASE 9A1)	alpha-trehalose-phosphate synthase (UDP-forming)activity (GO:0003825)	2.88167	0.22216	0.128799	0.0491785
ZmPIP1;1		GRMZM2G174807				1373.24	624.1	551.39	696.954
ZmPIP1;1	phosphate	GRMZM2G015401		phosphate transporter	Mitochondrial phosphate transporter	108.734	51.1696	37.7539	50.253
ZmPIP1;1	sulfate	GRMZM2G444801	100281787	SULTR3;4 (SULFATE TRANSPORTER 3;4); sulfate transmembrane transporter	GO:0008272; sulfate transport	22.8875	2.29075	1.50279	5.17799	Kataoka T et al. 2004,[29]
ZmPIP1;1	Urea	GRMZM2G080603:	542725	glycine-rich RNA-binding protein , CCR2 (COLD, CIRCADIAN RHYTHM, AND RNA BINDING 2	Catalysis of the reaction: xanthine + NAD+ + H2O = urate + NADH + H+.	4939.54	890.583	463.939	1253.39	Schüttpelz M et al. 2008,[62]
ZmPIP1;1	Urea	GRMZM2G000823:		LOS4 (LOW EXPRESSION OF OSMOTICALLY RESPONSIVE GENES 4);	calcium activated cation channel activity (GO:0005227):Catalysis of the reaction: xanthine + NAD+ + H2O = urate + NADH + H+:	45.9858	10.7394	6.73436	13.434	Gong Z, et al. 2005,[63]
ZmPIP1;1	Urea	GRMZM2G000823:		LOS4 (LOW EXPRESSION OF OSMOTICALLY RESPONSIVE GENES 4);	calcium activated cation channel activity (GO:0005227):Catalysis of the reaction: succinyl-CoA + glycine = 5-aminolevulinate + CoA + carbon dioxide:	45.9858	10.7394	6.73436	13.434	Gong Z, et al. 2005,[63]
ZmPIP1;1	drug	GRMZM2G079127	100273132	drug transmembrane transporter	GO:0015238; drug transmembrane transporter activity | GO:0006855; drug transmembrane transport	65.6219	25.1128	20.722	22.8591
ZmPIP1;3		GRMZM2G392975				320.308	208.37	120.404	143.314
ZmPIP1;4		GRMZM2G392975				320.308	208.37	120.404	143.314
ZmPIP1;3	phosphate	GRMZM2G022793		phosphate/phosphoenolpyruvate translocator,	GO:0055085; transmembrane transport	12.9536	8.62666	3.94546	4.28023
ZmPIP1;3	sugar	GRMZM2G083173	100285573	TMT2 (TONOPLAST MONOSACCHARIDE TRANSPORTER2);	GO:0055085; transmembrane transport | GO:0022891; substrate-specific transmembrane transporter activity	102.584	64.2411	37.0034	39.5437	Wormit A, et al. 2006,[40]
ZmPIP1;3	Auxin	GRMZM2G050089		auxin efflux carrier family protein	GO:0016021; integral to membrane | GO:0055085; transmembrane transport	24.8951	13.9903	2.89348	3.79629
ZmPIP1;3	amino acid transpor	GRMZM2G078292		cationic amino acid transporter,	GO:0015171; amino acid transmembrane transporter activity | GO:0006865; amino acid transport	17.9814	10.4663	6.80658	7.2805
ZmPIP1;3	potassium	GRMZM2G106250	100191282	3-hydroxybutyryl-CoA dehydrogenase,	GO:0006813; potassium ion transport;	15.2624	9.51774	3.40815	5.5306
ZmPIP1;5		GRMZM2G081843				6.40368	129.4	92.4027	203.534
ZmPIP1;5	sugar	GRMZM2G374812		STP1 (SUGAR TRANSPORTER 1); carbohydrate transmembrane transporter/ sugar:hydrogen symporter	GO:0055085; transmembrane transport	16.1474	32.2928	25.4992	42.8974	Hem S, et al. 2007,[64]
ZmPIP1;5	magnesium ion	GRMZM2G159295		magnesium transporter CorA-like family protein (MRS2-2)	GO:0055085; transmembrane transport | GO:0046873; metal ion transmembrane transporter activity | GO:0030001; metal ion transport	17.9929	25.793	22.4066	29.3898
ZmPIP1;6		GRMZM2G136032				8.86477	2.9476	5.88405	10.3373
ZmPIP1;6	peptide transport	GRMZM2G026391	100273385	YSL2 (YELLOW STRIPE LIKE 2); oligopeptide transporter	GO:0055085; transmembrane transport	6.21363	0.775833	3.69503	6.74278	Schaaf G, S. et al. 2005,[41]
ZmPIP2;1		GRMZM2G014914				863.196	222.715	133.095	270.824
ZmPIP2;1	phosphate	GRMZM2G109315	100192764	MAG1 (MAIGO 1); calcineurin-like phosphoesterase family protein hydrolase/ protein serine/threonine phosphatase		40.4408	17.1786	14.2017	19.1608	Kleine-Vehn J, et al. 2008,[65]
ZmPIP2;1	phosphate	GRMZM2G152827	541617	mitochondrial phosphate transporter		120.306	59.7583	43.0282	54.8797
ZmPIP2;1	sulfate	GRMZM2G444801	100281787	SULTR3;4 (SULFATE TRANSPORTER 3;4); sulfate transmembrane transporter	GO:0008272; sulfate transport	22.8875	2.29075	1.50279	5.17799
ZmPIP2;1	Carbon dioxide-CO2（urate）	GRMZM2G000823:		LOS4 (LOW EXPRESSION OF OSMOTICALLY RESPONSIVE GENES 4)	calcium activated cation channel activity (GO:0005227):Catalysis of the reaction: succinyl-CoA + glycine = 5-aminolevulinate + CoA + carbon dioxide:Catalysis of the reaction: xanthine + NAD+ + H2O = urate + NADH + H+:	45.9858	10.7394	6.73436	13.434	Gong Z, et al. 2005,[63]
ZmPIP2;1	sodium ion	GRMZM2G311165		NHX2 (SODIUM HYDROGEN EXCHANGER 2); sodium ion transmembrane transporter/ sodium:hydrogen antiporter	GO:0055085; transmembrane transport | GO:0016021; integral to membrane | GO:0015385; sodium:hydrogen antiporter activity | GO:0015299; solute:hydrogen antiporter activity | GO:0006885; regulation of pH | GO:0006814; sodium ion transport |	20.4002	4.59235	3.05251	3.82052	Yokoi S,et alo. 2002 ,[42]
ZmPIP2;1	zinc ion	GRMZM2G005036	100280280	MPPalpha (mitochondrial processing peptidase alpha subunit); catalytic/ metal ion binding / metalloendopeptidase/ zinc ion binding	GO:0046872; metal ion binding:GO:0008270; zinc ion binding:	30.6425	17.3866	15.501	18.1966
ZmPIP2;1	Mercury	GRMZM2G155525	100282516	heavy-metal-associated domain-containing protein	GO:0046872; metal ion binding | GO:0030001; metal ion transport | GO:0015694; mercury ion transport | GO:0015097; mercury ion transmembrane transporter activity	72.3628	18.4975	8.64898	13.3048
ZmPIP2;1	Mercury	GRMZM2G087101		heavy-metal-associated domain-containing protein	GO:0015694; mercury ion transport | GO:0015097; mercury ion transmembrane transporter activity	68.3465	17.0668	8.33896	12.5239
ZmPIP2;2		GRMZM2G092125				365.472	72.1491	103.377	246.243
ZmPIP2;2	Urea – urate (CO2)	GRMZM2G013461		cysteine protease inhibitor protein.degradation.cysteine protease	urea carboxylase activity (GO:0004847)	42.2777	19.9676	24.2857	35.2509
ZmPIP2;2	Urea – urate (CO2)	GRMZM2G071589	100383130	RNA recognition motif (RRM)-containing protein	:nucleic acid binding (GO:0003676) (GO):Definition: Catalysis of the reaction: xanthine + NAD+ + H2O = urate + NADH + H+.	25.4365	13.5193	15.2452	21.7182
ZmPIP2;2	hydrogen peroxide (H2O2)	GRMZM2G165272		AT-HSFB2B; transcription factor/ transcription repressor	Catalysis of the reaction: vanillyl alcohol + O2 = vanillin + hydrogen peroxide.""	23.6224	8.31656	11.2228	18.3177
ZmPIP2;3		GRMZM2G081192				99.4106	97.247	32.2351	64.3703
ZmPIP2;3	fatty acid	GRMZM2G038953:		signal recognition particle 54 kDa protein 3 / SRP54 (SRP-54C)	SRP-dependent cotranslational protein targeting to membrane (GO:0006614) (GO):Enables the directed movement of short-chain fatty acids into, out of, or within a cell. Short-chain fatty acids have a chain length of less than 10 carbons.	22.266	19.9655	12.8227	16.7936	Rutschow H.et al.2008,[67]
ZmPIP2;3	Carbon dioxide-CO2（urate）	GRMZM2G403797	100277394	ubiquitin thiolesterase	ubiquitin thiolesterase activity (GO:0004221) (GO) Catalysis of the reaction: prephenate + NAD+ = 4-hydroxyphenylpyruvate + carbon dioxide + NADH + H+	29.9125	28.4117	2.87662	8.60053
ZmPIP2;4		GRMZM2G154628				159.127	254.008	62.2685	66.4611
ZmPIP2;4	Urea – urate (CO2)	GRMZM2G078275		ATP-dependent RNA helicase SUV3	calcium activated cation channel activity (GO:0005227): helicase activity (GO:0004386) Catalysis of the reaction: succinyl-CoA + glycine = 5-aminolevulinate + CoA + carbon dioxide:Catalysis of the reaction: xanthine + NAD+ + H2O = urate + NADH + H+.	4.19635	6.21812	2.07331	2.34571
ZmPIP2;4	Urea – urate (CO2)	GRMZM2G373175			helicase domain-containing protein helicase activity (GO:0004386) (GO):Catalysis of the reaction: succinyl-CoA + glycine = 5-aminolevulinate + CoA + carbon dioxide.:Definition: Catalysis of the reaction: xanthine + NAD+ + H2O = urate + NADH + H+.	15.1028	19.6219	10.5139	10.7845
ZmPIP2;4	peptide transport	GRMZM2G112456		OPT4 (OLIGOPEPTIDE TRANSPORTER 4); oligopeptide transporter	GO:0055085; transmembrane transport	6.2937	9.85199	1.27644	1.44562
ZmPIP2;5		GRMZM2G178693				34.7761	26.4326	61.351	248.551
ZmPIP2;6		GRMZM2G047368				28.2033	18.1353	53.1757	199.434
ZmTIP1;2		GRMZM2G168439		ZmTIP1;2		124.288	11.9075	13.8056	12.931
ZmTIP1;2	hydrogen peroxide (H2O2)	AC202864.3_FG002	100279625	GATA transcription factor 13 zinc finger (GATA type) family protein	sequence-specific DNA binding transcription factor activity (GO:0003700) (GO)2011-11-12Definition: Catalysis of the reaction: vanillyl alcohol + O2 = vanillin + hydrogen peroxide	16.2601	0.355766	0.599359	0.537496
ZmTIP2;1		GRMZM2G027098	541894	water channel	GO:0055085; transmembrane transport	84.5483	136.842	174.552	380.784
ZmTIP2;1	Phosphate	GRMZM2G009223	100281048	GPT2; glucose-6-phosphate transmembrane transporter GO:0055085; transmembrane transport	| GO:0016021; integral to membrane	141.891	169.859	238.677	567.468	Kunz HH, et al. 2010,[71]
ZmTIP2;1	drug	GRMZM2G170128		MATE efflux family protein	GO:0015238; drug transmembrane transporter activity | GO:0006855; drug transmembrane transport	0.435921	1.63161	8.06848	25.9396
ZmTIP2;1	sucrose transport	GRMZM2G307561	100240688	SUT4 (SUCROSE TRANSPORTER 4); carbohydrate transmembrane transporter/ sucrose transmembrane transporter/ sucrose:hydrogen symporter/ sugar:hydrogen symporter	GO:0015770; sucrose transport | GO:0008515; sucrose transmembrane transporter activity	14.9682	30.1243	39.3134	74.1603	Hofmann J, et al. 2007,[69]
ZmTIP2;1	hydrogen peroxide (H2O2)	GRMZM2G445575	100192007	TGA4 (TGACG MOTIF-BINDING FACTOR 4); DNA binding / calmodulin binding / transcription factor	sequence-specific DNA binding transcription factor activity (GO:0003700) (GO):Definition: Catalysis of the reaction: vanillyl alcohol + O2 = vanillin + hydrogen peroxide	3.43771	9.7645	14.1859	34.0589
ZmTIP2;1	Auxin	GRMZM2G112598		auxin Efflux Carrier family protein	GO:0055085; transmembrane transport GO:0015667; site-specific DNA-methyltransferase (cytosine-N4-specific) activity |	0.351837	0.998906	3.65898	11.5492	Rock CD te al.2005,[59]
ZmTIP2;1	cobalt ion homeostasis	GRMZM2G063162		BAG6 (BCL-2-ASSOCIATED ATHANOGENE 6);	calmodulin binding / protein binding cellular cobalt ion homeostasis (GO:0006877)	7.10145	79.8835	139.948	448.035	Kang CH.et al,2006,[70]
ZmTIP2;1	Mercury	GRMZM2G096008		heavy-metal-associated domain-containing protein	GO:0046872; metal ion binding | GO:0030001; metal ion transport | GO:0015694; mercury ion transport | GO:0015097; mercury ion transmembrane transporter activity	0.522391	2.02978	3.24959	7.46373
ZmTIP2;2		GRMZM2G056908	541895	water channel	GO:0055085; transmembrane transport	4.55336	5.91993	7.84764	21.6077
ZmTIP2;2	phosphate	GRMZM2G009223	100281048	GPT2; glucose-6-phosphate transmembrane transporter	GO:0055085; transmembrane transport	141.891	169.859	238.677	567.468	Kunz HH, et al. 2010,[68]
ZmTIP2;2	sulfate	GRMZM2G042171		SULTR2;1, transport.sulphate	GO:0008272; sulfate transport | GO:0008271; secondary active sulfate transmembrane transporter activity	11.6907	17.585	80.4786	311	Kataoka T, et al. 2004[29]
ZmTIP2;2	chloride (Cl−)	AC234165.1_FG002	100280698	Lipoprotein	voltage-gated chloride channel activity (GO:0005247)	1.75783	11.4124	42.554	205.634
ZmTIP2;3	ZmTIP2;3	GRMZM2G125023				16.4143	1.50129	0.66028	0.912982
ZmTIP2;3	nitrate	GRMZM2G455124		ATNRT2.5 (nitrate transporter2.5); nitrate transmembrane transporter	transport.nitrate GO:0055085; transmembrane transport	1.78005	0.081755	0.0362454	0.0588175
ZmTIP2;3	Urea – urate (CO2)	GRMZM2G099231		APP (ARABIDOPSIS POLY(ADP-RIBOSE) POLYMERASE);	NAD+ ADP-ribosyltransferase/ nucleic acid binding:Definition: Catalysis of the reaction: xanthine + NAD+ + H2O = urate + NADH + H+.2011-11-12Definition: Catalysis of the reaction: dibenzothiophene + NADH + O2 + H+ = NAD+ + cis-1,2-dihydroxy-1,2-dihydrodibenzothiophene.	8.34907	0.848894	0.43425	0.563746	Doucet-Chabeaud G, et al. 2001[72]
ZmTIP2;3	drug	GRMZM2G423884		MATE efflux protein-related transport.ABC transporters and multidrug resistance systems	GO:0006855; drug transmembrane transport GO:0015238; drug transmembrane transporter activity	2.5537	0.169616	0.037599	0.213549
ZmTIP2;3	copper ion	GRMZM2G043301		sks17 (SKU5 Similar 17); copper ion binding / oxidoreductase	GO:0005507; copper ion binding | GO:0005215; transporter activity	7.73554	0.166244	0.20473	0.0132891	Sedbrook JC.et al.2002[73]
ZmTIP2;3	potassium	GRMZM2G162222		flavin-containing monooxygenase family protein / FMO family protein	GO:0006813; potassium ion transport | GO:0004499; flavin-containing monooxygenase activity	3.85667	0.288419	0.114045	0.078513
ZmTIP2;3	potassium	GRMZM2G423886	100272315	flavin-containing monooxygenase family protein / FMO family protein	GO:0006813; potassium ion transport	4.67572	0.524847	0.340081	0.697096
ZmTIP2;3	Auxin	GRMZM2G085236		multidrug resistance protein 11, ABCB19; ATPase, coupled to transmembrane movement of substances / auxin efflux transmembrane transporter transport.ABC transporters and multidrug resistance systems	GO:0019001; guanyl nucleotide binding | GO:0042626; ATPase activity coupled to transmembrane movement of substances | GO:0055085; transmembrane transport |GO:0017111; nucleoside-triphosphatase activity | GO:0016887; ATPase activity | GO:0000166; nucleotide binding | GO:0004871; signal transducer activity | GO:0005524; ATP binding | GO:0006810; transport | GO:0007186; G-protein coupled	18.5136	1.54962	0.216284	0.492475	Morris PF, et al. 2009[74]
ZmTIP2;3	Auxin	GRMZM2G315375	1003840	multidrug resistance protein 1, ABCB1 (ATP BINDING CASSETTE SUBFAMILY B1); ATPase, coupled to transmembrane movement of substances / auxin efflux transmembrane transporter/ calmodulin binding transport.ABC transporters and multidrug resistance systems	GO:0055085; transmembrane transport | GO:0042626; ATPase activity coupled to transmembrane movement of substances	105.122	9.92189	1.48954	0.0629468	Shen C, et al.2010[75]
ZmTIP2;3	hydrogen peroxide (H2O2)	GRMZM2G102314		mitochondrial SBP40 PTAC9 (PLASTID TRANSCRIPTIONALLY ACTIVE 9)	single-stranded DNA binding """single-stranded DNA binding (GO:0003697)	2.24628	0.169148	0.0499937	0.0811275
					Definition: Catalysis of the reaction: methanol + O2 = formaldehyde + H2O2
ZmTIP2;3	peptide transport	GRMZM2G316889	100381733	peptide transporter PTR2-B	proton-dependent oligopeptide transport (POT) family protein transport.peptides and oligopeptides	7.34753	1.07626	0.384753	0.587901
ZmTIP3;1		GRMZM2G305446				1.72853	0.06663	0	0
ZmTIP3;1	Nitrate	GRMZM2G455124		ATNRT2.5 (nitrate transporter2.5); nitrate transmembrane transporter	transport.nitrate GO:0055085; transmembrane transport	1.78005	0.081755	0.0362454	0.0588175
ZmTIP3;1	chloride (Cl−)	GRMZM2G041645			GO:0006821; chloride transport | GO:0005247; voltage-gated chloride channel activity	17.3158	0.135266	0	0
ZmTIP3;1	sugar	GRMZM2G481021		ATPLT5 (POLYOL TRANSPORTER 5); D-ribose transmembrane transporter/ D-xylose transmembrane transporter/ carbohydrate transmembrane transporter/ galactose transmembrane transporter/ glucose transmembrane transporter/ glycerol transmembrane transporter	transport.sugars GO:0016020; membrane | GO:0022891; substrate-specific transmembrane transporter activity | GO:0055085; transmembrane transport	1.1362	0.0215145	0.123998	0.0773914
ZmTIP3;1	potassium	GRMZM2G428628		sarcosine oxidase family protein	GO:0006813; potassium ion transport | GO:0008324; cation transmembrane transporter activity | GO:0016491; oxidoreductase activity |	15.6648	0.218159	0	0
ZmTIP3;2		GRMZM2G103983				15.5604	0.91543	0.686821	1.13987
ZmTIP3;2	Nitrate	GRMZM2G455124		ATNRT2.5 (nitrate transporter2.5); nitrate transmembrane transporter	transport.nitrate GO:0055085; transmembrane transport	1.78005	0.081755	0.0362454	0.0588175
ZmTIP3;2（ZmPIP1;1	sulfate	GRMZM2G444801	100281787	SULTR3;4 (SULFATE TRANSPORTER 3;4); sulfate transmembrane transporter	transport.sulphate GO:0008272; sulfate transport	22.8875	2.29075	1.50279	5.17799	Kataoka T,et al.2004[29]
ZmTIP3;2	cobalt	GRMZM2G121275		ammonia transporter/ methylammonium transmembrane transporter/ water channel	transport GO:0055085; transmembrane transport	30.198	3.40646	3.13575	4.30239
ZmTIP3;2	Auxin	GRMZM2G085236		multidrug resistance protein 11, ABCB19; ATPase, coupled to transmembrane movement of substances / auxin efflux transmembrane transporter transport.ABC transporters and multidrug resistance systems	GO:0019001; guanyl nucleotide binding | GO:0042626; ATPase activity coupled to transmembrane movement of substances | GO:0055085; transmembrane transport GO:0016887; ATPase activity | GO:0000166; nucleotide binding | GO:0004871; signal transducer activity | GO:0005524; ATP binding | GO:0006810; transport | GO:0007186; G-protein coupled	18.5136	1.54962	0.216284	0.492475
ZmTIP4;2		GRMZM2G108273				0.028412	0.11653	8.45954	13.8006
ZmTIP4;2	silicate	GRMZM2G068557	100281526	ferric reductase-like transmembrane component silicate transport (id: GO:0015708) ATFRO7 (FERRIC REDUCTION OXIDASE 7); ferric-chelate reductase/ oxidoreductase ATFRO7 (FERRIC REDUCTION OXIDASE 7); ferric-chelate reductase/ oxidoreductase ferric reduction oxidase 7,	nitrite transport (id: GO:0015707)	3.26182	11.6793	240.067	406.978	Jeong J,et al. 2009,[34]
ZmTIP4;2	formate	GRMZM2G068557			silicate transport (id: GO:0015708)	3.26182	11.6793	240.067	406.978	Jeong J,et al. 2009,[34]
ZmTIP4;2	nitrite transport	GRMZM2G068557			formate uptake transmembrane transporter activity (id: GO:0015659)	3.26182	11.6793	240.067	406.978	Jeong J,et al. 2009,[34]
ZmTIP4;2	sodium ion	GRMZM2G068557			sodium-translocating F-type ATPase activity (id: GO:0016468)
ZmTIP4;4		GRMZM2G093090				10.0232	0.695458	0.034258	0
ZmTIP4;4	Nitrate transport	GRMZM2G455124		ATNRT2.5 (nitrate transporter2.5); nitrate transmembrane transporter	transport.nitrate GO:0055085; transmembrane transport	1.78005	0.081755	0.0362454	0.0588175
ZmTIP4;4	copper ion	GRMZM2G043301		sks17 (SKU5 Similar 17); copper ion binding / oxidoreductase	GO:0005507; copper ion binding | GO:0005215; transporter activity	7.73554	0.166244	0.20473	0.0132891	Sedbrook JC, et al.2002 [73]
ZmTIP4;4	potassium	GRMZM2G174773		oxidoreductase family protein	GO:0016616; oxidoreductase activity acting on the CH-OH group of donors NAD or NADP as acceptor | GO:0008324; cation transmembrane transporter activity | GO:0008152; metabolic process | GO:0006813; potassium ion transport	2.22784	0.141445	0.125417	0.0508802
